# Supplementary material for: Metagenomic Analyses Reveal the Influence of Depth Layers on Marine Biodiversity on Tropical and Subtropical Regions
Source: MDPI journal article supplement (doi:10.3390/microorganisms11071668), 2023-06-27
Supplement: s1 [file s1]

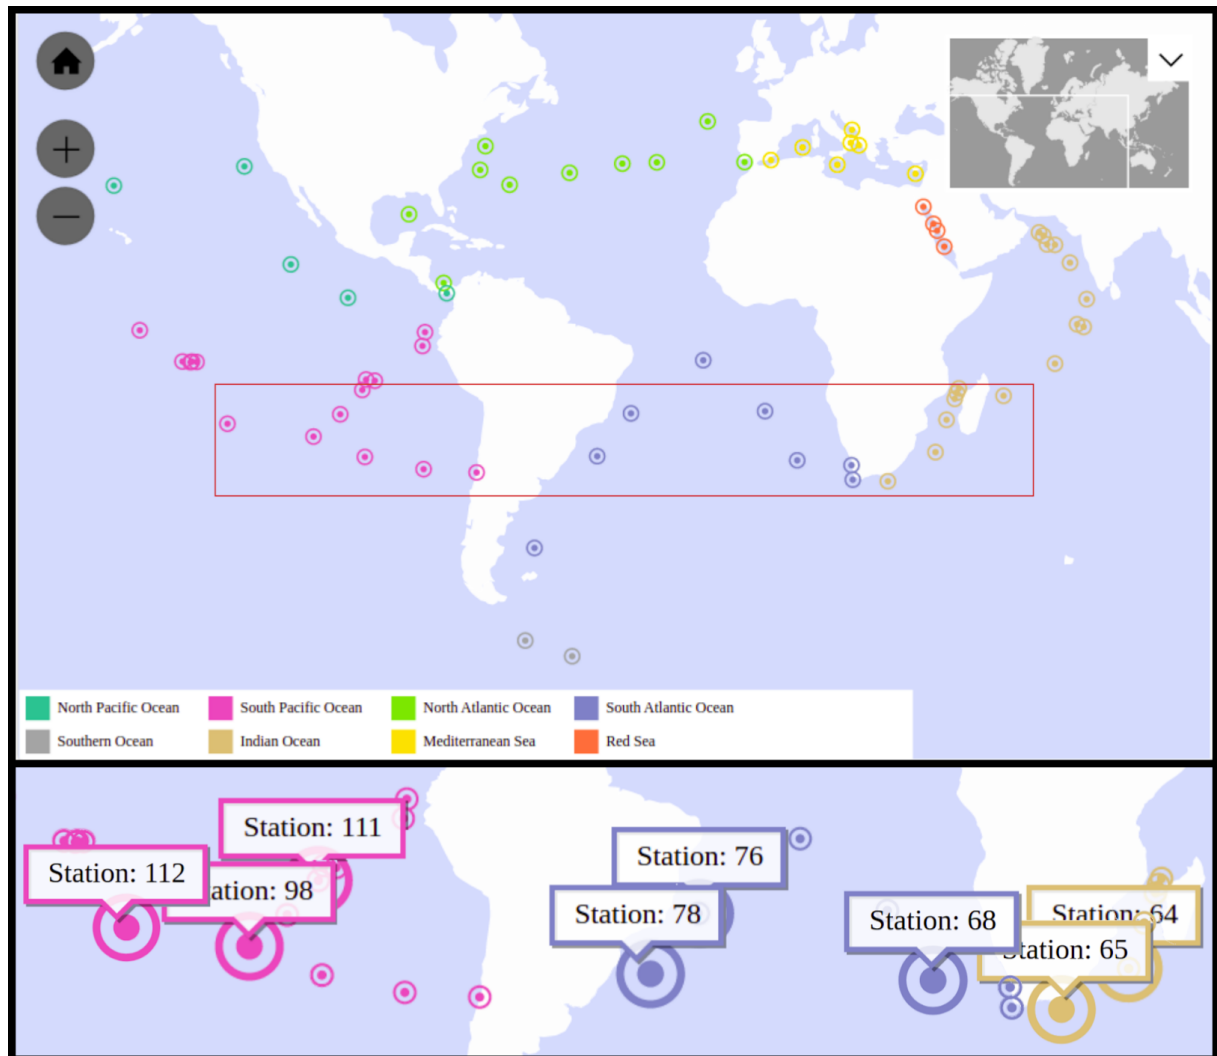

**Figure S1.** Latitude filter of collection stations. **A)** Filter 1: selection of stations within an interval of  $5^\circ$  positive or negative in relation to stations 76 and 78. **B)** Filter 2: from filter 1, selection of stations with samples in the three depth layers simultaneously.

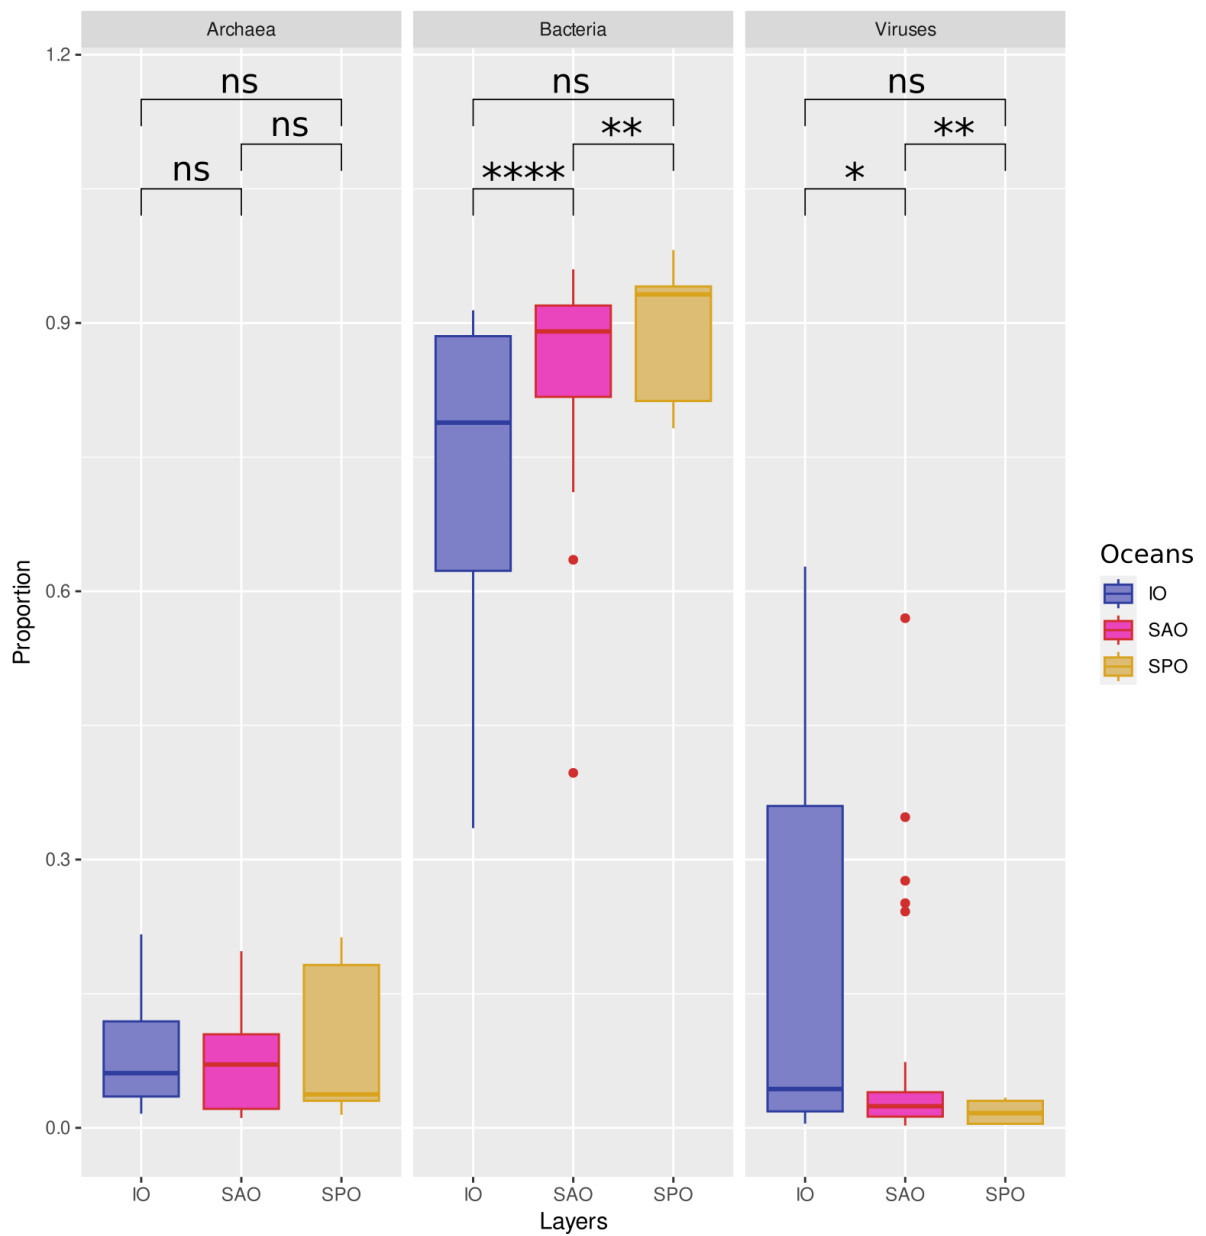

**Figure S2.** Distribution of domain proportions considering the samples of each ocean. The oceans are represented by the acronyms: (IO - Indian Ocean, SAO - South Atlantic Ocean, and SPO - South Pacific Ocean). Statistical significance is represented as follows. ns (adjusted p-value > 0.05); \* (adjusted p-value ≤ 0.05); \*\* (adjusted p-value ≤ 0.01); \*\*\* (adjusted p-value ≤ 0.001); \*\*\*\* (adjusted p-value ≤ 0.0001).

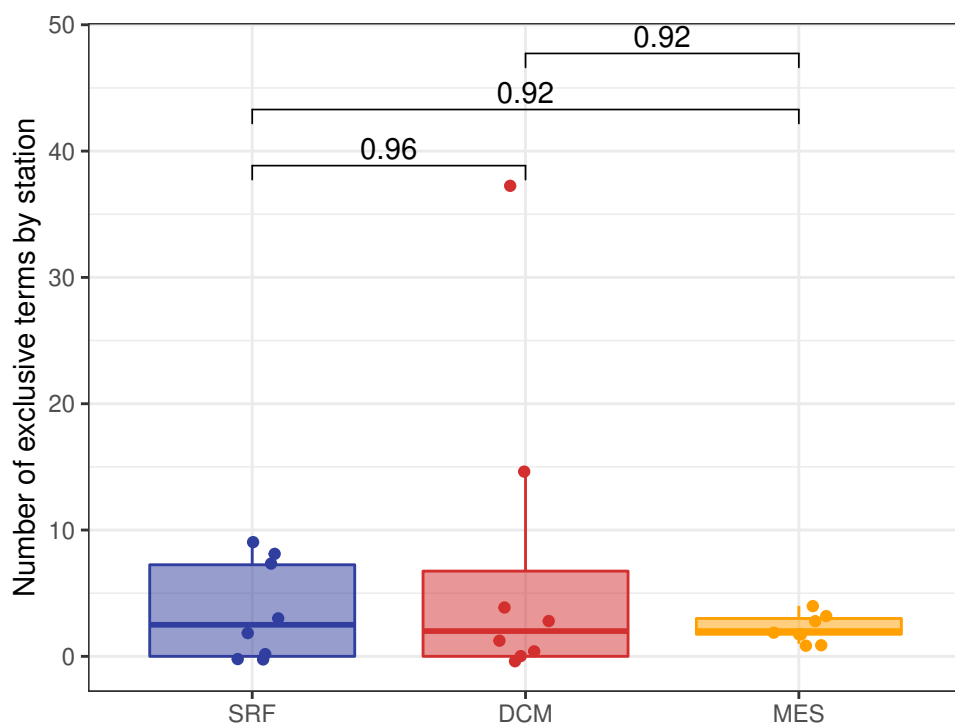

**Figure S3:** Distribution of exclusive terms by stations in each depth layer. Exclusive terms are the ones that appear only in a given depth layer of a given station. Comparisons are performed with the Wilcoxon rank sum test and Bonferroni-adjusted p-values are represented in each comparison. No significant comparison was observed.
