# Supplementary material for: Metagenomic Analyses Reveal the Influence of Depth Layers on Marine Biodiversity on Tropical and Subtropical Regions
Source: Microorganisms. 2023 Jun 27;11(7):1668. doi: 10.3390/microorganisms11071668 (PMC10386303; doi:10.3390/microorganisms11071668)
Supplement: Supplementary file 1 [file microorganisms-11-01668-s001.zip]

Archive with 6 entries (6 files):
- SupFigures.pdf
- SupTableS1.xlsx
- SupTableS2.xlsx
- SupTableS3.xlsx
- SupTableS4.xlsx
- SupTableS5.xlsx
