# Supplementary material for: Metagenomic Analyses Reveal the Influence of Depth Layers on Marine Biodiversity on Tropical and Subtropical Regions
Source: Microorganisms. 2023 Jun 27;11(7):1668. doi: 10.3390/microorganisms11071668 (PMC10386303; doi:10.3390/microorganisms11071668)
Supplement: Supplementary file 1 [file microorganisms-11-01668-s001.zip › SupTableS1.xlsx]

## Sheet: Supplementary Table S1
Supplementary Table S1. List of samples from Tara Oceans Project, by oceans, stations, and layers
SAMPLES (INSDC run accession number(s))	OCEANS	STATIONS	LAYERS
ERR594324	(IO) Indian Ocean	64	DCM
ERR598972	(IO) Indian Ocean	64	DCM
ERR599023	(IO) Indian Ocean	64	DCM
ERR599025	(IO) Indian Ocean	64	DCM
ERR594385	(IO) Indian Ocean	64	DCM
ERR599021	(IO) Indian Ocean	64	MES
ERR599164	(IO) Indian Ocean	64	MES
ERR598970	(IO) Indian Ocean	64	SRF
ERR599088	(IO) Indian Ocean	64	SRF
ERR599150	(IO) Indian Ocean	64	SRF
ERR594392	(IO) Indian Ocean	64	SRF
ERR594291	(IO) Indian Ocean	65	DCM
ERR598990	(IO) Indian Ocean	65	DCM
ERR599018	(IO) Indian Ocean	65	DCM
ERR599110	(IO) Indian Ocean	65	DCM
ERR594382	(IO) Indian Ocean	65	DCM
ERR594414	(IO) Indian Ocean	65	DCM
ERR598960	(IO) Indian Ocean	65	MES
ERR599034	(IO) Indian Ocean	65	MES
ERR594320	(IO) Indian Ocean	65	SRF
ERR598979	(IO) Indian Ocean	65	SRF
ERR599146	(IO) Indian Ocean	65	SRF
ERR594359	(IO) Indian Ocean	65	SRF
ERR594361	(IO) Indian Ocean	65	SRF
ERR599017	(SAO) South Atlantic Ocean	68	DCM
ERR599056	(SAO) South Atlantic Ocean	68	DCM
ERR599103	(SAO) South Atlantic Ocean	68	DCM
ERR594294	(SAO) South Atlantic Ocean	68	DCM
ERR594348	(SAO) South Atlantic Ocean	68	DCM
ERR594415	(SAO) South Atlantic Ocean	68	DCM
ERR598947	(SAO) South Atlantic Ocean	68	MES
ERR599131	(SAO) South Atlantic Ocean	68	MES
ERR594302	(SAO) South Atlantic Ocean	68	MES
ERR599129	(SAO) South Atlantic Ocean	68	SRF
ERR599171	(SAO) South Atlantic Ocean	68	SRF
ERR599174	(SAO) South Atlantic Ocean	68	SRF
ERR594318	(SAO) South Atlantic Ocean	68	SRF
ERR594297	(SAO) South Atlantic Ocean	68	SRF
ERR594391	(SAO) South Atlantic Ocean	68	SRF
ERR599040	(SAO) South Atlantic Ocean	76	DCM
ERR599148	(SAO) South Atlantic Ocean	76	DCM
ERR594321	(SAO) South Atlantic Ocean	76	DCM
ERR594298	(SAO) South Atlantic Ocean	76	DCM
ERR594355	(SAO) South Atlantic Ocean	76	DCM
ERR599000	(SAO) South Atlantic Ocean	76	MES
ERR599154	(SAO) South Atlantic Ocean	76	MES
ERR594333	(SAO) South Atlantic Ocean	76	MES
ERR599010	(SAO) South Atlantic Ocean	76	SRF
ERR599126	(SAO) South Atlantic Ocean	76	SRF
ERR594310	(SAO) South Atlantic Ocean	76	SRF
ERR594286	(SAO) South Atlantic Ocean	76	SRF
ERR594354	(SAO) South Atlantic Ocean	76	SRF
ERR599046	(SAO) South Atlantic Ocean	78	DCM
ERR599101	(SAO) South Atlantic Ocean	78	DCM
ERR594336	(SAO) South Atlantic Ocean	78	DCM
ERR594303	(SAO) South Atlantic Ocean	78	DCM
ERR599124	(SAO) South Atlantic Ocean	78	MES
ERR599159	(SAO) South Atlantic Ocean	78	MES
ERR594289	(SAO) South Atlantic Ocean	78	MES
ERR599006	(SAO) South Atlantic Ocean	78	SRF
ERR599022	(SAO) South Atlantic Ocean	78	SRF
ERR594340	(SAO) South Atlantic Ocean	78	SRF
ERR594332	(SAO) South Atlantic Ocean	78	SRF
ERR594411	(SAO) South Atlantic Ocean	78	SRF
ERR599042	(SPO) South Pacific Ocean	98	DCM
ERR599079	(SPO) South Pacific Ocean	98	DCM
ERR599071	(SPO) South Pacific Ocean	98	MES
ERR599085	(SPO) South Pacific Ocean	98	MES
ERR599093	(SPO) South Pacific Ocean	98	SRF
ERR599120	(SPO) South Pacific Ocean	98	SRF
ERR598961	(SPO) South Pacific Ocean	111	DCM
ERR599086	(SPO) South Pacific Ocean	111	MES
ERR599077	(SPO) South Pacific Ocean	111	SRF
ERR598957	(SPO) South Pacific Ocean	112	DCM
ERR599072	(SPO) South Pacific Ocean	112	MES
ERR598954	(SPO) South Pacific Ocean	112	SRF
