# Supplementary material for: Metagenomic Analyses Reveal the Influence of Depth Layers on Marine Biodiversity on Tropical and Subtropical Regions
Source: Microorganisms. 2023 Jun 27;11(7):1668. doi: 10.3390/microorganisms11071668 (PMC10386303; doi:10.3390/microorganisms11071668)
Supplement: Supplementary file 1 [file microorganisms-11-01668-s001.zip › SupTableS2.xlsx]

## Sheet: matrix_diss
Supplementary Table S2. Euclidean dissimilarity matrix
	DCM - T064 - 598972	DCM - T064 - 599023	DCM - T064 - 599025	DCM - T064 - 594385	MES - T064 - 599021	MES - T064 - 599164	SRF - T064 - 598970	SRF - T064 - 599088	SRF - T064 - 599150	SRF - T064 - 594392	DCM - T065 - 594291	DCM - T065 - 598990	DCM - T065 - 599018	DCM - T065 - 599110	DCM - T065 - 594382	DCM - T065 - 594414	MES - T065 - 598960	MES - T065 - 599034	SRF - T065 - 594320	SRF - T065 - 598979	SRF - T065 - 599146	SRF - T065 - 594359	SRF - T065 - 594361	DCM - T068 - 599017	DCM - T068 - 599056	DCM - T068 - 599103	DCM - T068 - 594294	DCM - T068 - 594348	DCM - T068 - 594415	MES - T068 - 598947	MES - T068 - 599131	MES - T068 - 594302	SRF - T068 - 599129	SRF - T068 - 599171	SRF - T068 - 599174	SRF - T068 - 594318	SRF - T068 - 594297	SRF - T068 - 594391	DCM - T076 - 599040	DCM - T076 - 599148	DCM - T076 - 594321	DCM - T076 - 594298	DCM - T076 - 594355	MES - T076 - 599000	MES - T076 - 599154	MES - T076 - 594333	SRF - T076 - 599010	SRF - T076 - 599126	SRF - T076 - 594310
DCM - T064 - 594324	0	0.129061208516437	0.143055929971343	0.12961631063722	0.0251894149162485	0.159617331420817	0.149628336192566	0.0927801663472751	0.088096603179778	0.0963730440401759	0.0653937271950198	0.0407180217623611	0.13799581429963	0.139640489321006	0.137600370273856	0.0260539320059961	0.0345881608132341	0.176408053990704	0.180711205770422	0.0354155554138285	0.119338647618564	0.115577399880363	0.047442276049409	0.038617739708508	0.0917381948448695	0.0949924650719207	0.0930013954827086	0.090699829826454	0.0922563792161659	0.0326233681525757	0.155928944383507	0.159558764913114	0.160199554738493	0.0941859165730245	0.0948982586207416	0.0999782033235789	0.0750273271887971	0.0887789232147499	0.0510148895562714	0.180170338403773	0.171428965497113	0.104673270576362	0.164374398449004	0.0635570122388089	0.175890614891223	0.179585164186912	0.213029020512515	0.13685248191302	0.125779541999705
DCM - T064 - 598972	0.129061208516437	0	0.0139947214549061	0.000555102120782802	0.154250623432686	0.0305561229043797	0.0205671276761289	0.0362810421691619	0.040964605336659	0.0326881644762611	0.0636674813214173	0.088343186754076	0.00893460578319305	0.0105792808045689	0.0085391617574192	0.103007276510441	0.094473047703203	0.0473468454742672	0.0516499972539849	0.0936456531026086	0.00972256089787338	0.0134838086360745	0.081618932467028	0.0904434688079291	0.0373230136715675	0.0340687434445164	0.0360598130337284	0.038361378689983	0.0368048293002712	0.161684576669013	0.0268677358670704	0.0304975563966767	0.0311383462220559	0.0348752919434125	0.0341629498956955	0.0290830051928581	0.05403388132764	0.0402822853016871	0.0780463189601656	0.0511091298873355	0.0423677569806764	0.0243879379400752	0.035313189932567	0.0655041962776282	0.0468294063747857	0.0505239556704745	0.0839678119960777	0.00779127339658325	0.00328166651673223
DCM - T064 - 599023	0.143055929971343	0.0139947214549061	0	0.0134396193341233	0.168245344887592	0.0165614014494736	0.00657240622122279	0.050275763624068	0.0549593267915651	0.0466828859311672	0.0776622027763234	0.102337908208982	0.00506011567171305	0.00341544065033716	0.0054555596974869	0.117001997965347	0.108467769158109	0.0333521240193611	0.0376552757990788	0.107640374557515	0.0237172823527795	0.0274785300909806	0.0956136539219341	0.104438190262835	0.0513177351264736	0.0480634648994225	0.0500545344886345	0.0523561001448891	0.0507995507551773	0.175679298123919	0.0128730144121643	0.0165028349417706	0.0171436247671498	0.0488700133983186	0.0481576713506016	0.0430777266477642	0.0680286027825461	0.0542770067565932	0.0920410404150717	0.0371144084324294	0.0283730355257703	0.0383826593949813	0.0213184684776609	0.0794989177325343	0.0328346849198796	0.0365292342155684	0.0699730905411716	0.00620344805832285	0.0172763879716383
DCM - T064 - 599025	0.12961631063722	0.000555102120782802	0.0134396193341233	0	0.154805725553468	0.0300010207835969	0.0200120255553461	0.0368361442899447	0.0415197074574418	0.0332432665970439	0.0642225834422001	0.0888982888748588	0.00837950366241025	0.0100241786837861	0.0079840596366364	0.103562378631224	0.0950281498239858	0.0467917433534843	0.0510948951332021	0.0942007552233914	0.0102776630186562	0.0140389107568573	0.0821740345878108	0.0909985709287119	0.0378781157923503	0.0346238455652992	0.0366149151545112	0.0389164808107658	0.037359931421054	0.162239678789796	0.0263126337462876	0.0299424542758939	0.0305832441012731	0.0354303940641953	0.0347180520164783	0.0296381073136409	0.0545889834484228	0.0408373874224699	0.0786014210809484	0.0505540277665527	0.0418126548598936	0.024943040060858	0.0347580878117842	0.066059298398411	0.0462743042540029	0.0499688535496917	0.0834127098752949	0.00723617127580045	0.00383676863751503
DCM - T064 - 594385	0.0251894149162485	0.154250623432686	0.168245344887592	0.154805725553468	0	0.184806746337065	0.174817751108814	0.117969581263524	0.113286018096027	0.121562458956424	0.0905831421112683	0.0659074366786096	0.163185229215879	0.164829904237255	0.162789785190105	0.0512433469222446	0.0597775757294826	0.201597468906953	0.20590062068667	0.060604970330077	0.144528062534812	0.140766814796611	0.0726316909656576	0.0638071546247565	0.116927609761118	0.120181879988169	0.118190810398957	0.115889244742703	0.117445794132414	0.00743395323632712	0.181118359299756	0.184748179829362	0.185388969654741	0.119375331489273	0.12008767353699	0.125167618239827	0.100216742105046	0.113968338130998	0.07620430447252	0.205359753320021	0.196618380413362	0.12986268549261	0.189563813365253	0.0887464271550574	0.201080029807471	0.20477457910316	0.238218435428763	0.162041896829269	0.150968956915953
MES - T064 - 599021	0.159617331420817	0.0305561229043797	0.0165614014494736	0.0300010207835969	0.184806746337065	0	0.00998899522825081	0.0668371650735416	0.0715207282410387	0.0632442873806408	0.094223604225797	0.118899309658456	0.0216215171211867	0.0199768420998108	0.0220169611469605	0.133563399414821	0.125029170607583	0.0167907225698875	0.0210938743496052	0.124201776006988	0.0402786838022531	0.0440399315404542	0.112175055371408	0.120999591712309	0.0678791365759472	0.0646248663488961	0.0666159359381081	0.0689175015943627	0.0673609522046509	0.192240699573392	0.00368838703730934	5.85665077029729e-05	0.000582223317676211	0.0654314148477922	0.0647190728000752	0.0596391280972378	0.0845900042320197	0.0708384082060668	0.108602441864545	0.0205530069829558	0.0118116340762967	0.0549440608444549	0.00475706702818735	0.0960603191820079	0.016273283470406	0.0199678327660948	0.053411689091698	0.0227648495077964	0.0338377894211119
MES - T064 - 599164	0.149628336192566	0.0205671276761289	0.00657240622122279	0.0200120255553461	0.174817751108814	0.00998899522825081	0	0.0568481698452908	0.0615317330127879	0.05325529215239	0.0842346089975461	0.108910314430205	0.0116325218929358	0.00998784687155996	0.0120279659187097	0.12357440418657	0.115040175379332	0.0267797177981383	0.031082869577856	0.114212780778737	0.0302896885740023	0.0340509363122034	0.102186060143157	0.111010596484058	0.0578901413476964	0.0546358711206453	0.0566269407098573	0.0589285063661119	0.0573719569764001	0.182251704345142	0.00630060819094147	0.00993042872054783	0.010571218545927	0.0554424196195414	0.0547300775718244	0.049650132868987	0.0746010090037689	0.060849412977816	0.0986134466362945	0.0305420022112066	0.0218006293045475	0.0449550656162041	0.0147460622564382	0.0860713239537571	0.0262622786986568	0.0299568279943456	0.0634006843199488	0.0127758542795456	0.0238487941928611
SRF - T064 - 598970	0.0927801663472751	0.0362810421691619	0.050275763624068	0.0368361442899447	0.117969581263524	0.0668371650735416	0.0568481698452908	0	0.00468356316749707	0.00359287769290084	0.0273864391522553	0.052062144584914	0.045215647952355	0.0468603229737309	0.0448202039265811	0.066726234341279	0.058192005534041	0.0836278876434291	0.0879310394231468	0.0573646109334466	0.0265584812712886	0.0227972335330875	0.0453378902978661	0.0541624266387671	0.00104197150240559	0.00221229872464557	0.000221229135433543	0.00208033652082107	0.000523787131109232	0.125403534499851	0.0631487780362323	0.0667785985658387	0.0674193883912179	0.0014057502257494	0.00211809227346649	0.00719803697630383	0.017752839158478	0.00400124313252515	0.0417652767910037	0.0873901720564975	0.0786487991498384	0.0118931042290867	0.071594232101729	0.0292231541084662	0.0831104485439477	0.0868049978396365	0.12024885416524	0.0440723155657452	0.0329993756524297
SRF - T064 - 599088	0.088096603179778	0.040964605336659	0.0549593267915651	0.0415197074574418	0.113286018096027	0.0715207282410387	0.0615317330127879	0.00468356316749707	0	0.00827644086039792	0.0227028759847582	0.047378581417417	0.0498992111198521	0.051543886141228	0.0495037670940782	0.0620426711737819	0.053508442366544	0.0883114508109262	0.0926146025906439	0.0526810477659496	0.0312420444387856	0.0274807967005846	0.040654327130369	0.0494788634712701	0.00364159166509148	0.00689586189214264	0.00490479230293062	0.002603226646676	0.00415977603638784	0.120719971332354	0.0678323412037294	0.0714621617333357	0.0721029515587149	0.00608931339324648	0.00680165544096356	0.0118816001438009	0.013069275990981	0.000682320034971928	0.0370817136235066	0.0920737352239945	0.0833323623173354	0.0165766673965838	0.0762777952692261	0.0245395909409691	0.0877940117114447	0.0914885610071335	0.124932417332737	0.0487558787332423	0.0376829388199268
SRF - T064 - 599150	0.0963730440401759	0.0326881644762611	0.0466828859311672	0.0332432665970439	0.121562458956424	0.0632442873806408	0.05325529215239	0.00359287769290084	0.00827644086039792	0	0.0309793168451561	0.0556550222778149	0.0416227702594542	0.04326744528083	0.0412273262336803	0.0703191120341798	0.0617848832269419	0.0800350099505283	0.084338161730246	0.0609574886263475	0.0229656035783877	0.0192043558401866	0.0489307679907669	0.057755304331668	0.00463484919530643	0.00138057896825527	0.0033716485574673	0.00567321421372191	0.00411666482401007	0.128996412192752	0.0595559003433315	0.0631857208729378	0.063826510698317	0.00218712746715144	0.00147478541943435	0.00360515928340299	0.0213457168513789	0.00759412082542599	0.0453581544839045	0.0837972943635966	0.0750559214569375	0.0083002265361859	0.0680013544088282	0.0328160318013671	0.0795175708510468	0.0832121201467356	0.116655976472339	0.0404794378728444	0.0294064979595289
SRF - T064 - 594392	0.0653937271950198	0.0636674813214173	0.0776622027763234	0.0642225834422001	0.0905831421112683	0.094223604225797	0.0842346089975461	0.0273864391522553	0.0227028759847582	0.0309793168451561	0	0.0246757054326587	0.0726020871046103	0.0742467621259862	0.0722066430788365	0.0393397951890237	0.0308055663817857	0.111014326795684	0.115317478575402	0.0299781717811913	0.0539449204235439	0.0501836726853428	0.0179514511456108	0.0267759874865118	0.0263444676498497	0.0295987378769009	0.0276076682876888	0.0253061026314342	0.0268626520211461	0.0980170953475955	0.0905352171884876	0.094165037718094	0.0948058275434732	0.0287921893780047	0.0295045314257218	0.0345844761285591	0.00963359999377728	0.0233851960197302	0.0143788376387484	0.114776611208753	0.106035238302094	0.039279543381342	0.0989806712539843	0.00183671495621091	0.110496887696203	0.114191436991892	0.147635293317495	0.0714587547180005	0.060385814804685
DCM - T065 - 594291	0.0407180217623611	0.088343186754076	0.102337908208982	0.0888982888748588	0.0659074366786096	0.118899309658456	0.108910314430205	0.052062144584914	0.047378581417417	0.0556550222778149	0.0246757054326587	0	0.097277792537269	0.0989224675586449	0.0968823485114952	0.014664089756365	0.00612986094912699	0.135690032228343	0.139993184008061	0.0053024663485326	0.0786206258562026	0.0748593781180015	0.00672425428704798	0.0021002820538531	0.0510201730825084	0.0542744433095596	0.0522833737203476	0.049981808064093	0.0515383574538048	0.0733413899149367	0.115210922621146	0.118840743150753	0.119481532976132	0.0534678948106634	0.0541802368583805	0.0592601815612179	0.034309305426436	0.0480609014523889	0.0102968677939104	0.139452316641412	0.130710943734752	0.0639552488140008	0.123656376686643	0.0228389904764478	0.135172593128862	0.138867142424551	0.172310998750154	0.0961344601506592	0.0850615202373438
DCM - T065 - 598990	0.13799581429963	0.00893460578319305	0.00506011567171305	0.00837950366241025	0.163185229215879	0.0216215171211867	0.0116325218929358	0.045215647952355	0.0498992111198521	0.0416227702594542	0.0726020871046103	0.097277792537269	0	0.00164467502137589	0.00039544402577385	0.111941882293634	0.103407653486396	0.0384122396910741	0.0427153914707918	0.102580258885802	0.0186571666810664	0.0224184144192675	0.0905535382502211	0.0993780745911221	0.0462576194547606	0.0430033492277094	0.0449944188169215	0.0472959844731761	0.0457394350834642	0.170619182452206	0.0179331300838773	0.0215629506134837	0.0222037404388629	0.0438098977266056	0.0430975556788885	0.0380176109760512	0.062968487110833	0.0492168910848801	0.0869809247433587	0.0421745241041425	0.0334331511974834	0.0333225437232683	0.026378584149374	0.0744388020608212	0.0378948005915927	0.0415893498872815	0.0750332062128847	0.0011433323866098	0.0122162722999253
DCM - T065 - 599018	0.139640489321006	0.0105792808045689	0.00341544065033716	0.0100241786837861	0.164829904237255	0.0199768420998108	0.00998784687155996	0.0468603229737309	0.051543886141228	0.04326744528083	0.0742467621259862	0.0989224675586449	0.00164467502137589	0	0.00204011904714974	0.11358655731501	0.105052328507772	0.0367675646696982	0.041070716449416	0.104224933907178	0.0203018417024423	0.0240630894406434	0.0921982132715969	0.101022749612498	0.0479022944761365	0.0446480242490853	0.0466390938382973	0.048940659494552	0.0473841101048401	0.172263857473582	0.0162884550625014	0.0199182755921078	0.020559065417487	0.0454545727479815	0.0447422307002644	0.039662285997427	0.0646131621322089	0.050861566106256	0.0886255997647346	0.0405298490827666	0.0317884761761075	0.0349672187446441	0.0247339091279981	0.0760834770821971	0.0362501255702168	0.0399446748659056	0.0733885311915088	0.00278800740798568	0.0138609473213012
DCM - T065 - 599110	0.137600370273856	0.0085391617574192	0.0054555596974869	0.0079840596366364	0.162789785190105	0.0220169611469605	0.0120279659187097	0.0448202039265811	0.0495037670940782	0.0412273262336803	0.0722066430788365	0.0968823485114952	0.00039544402577385	0.00204011904714974	0	0.11154643826786	0.103012209460622	0.038807683716848	0.0431108354965657	0.102184814860028	0.0182617226552926	0.0220229703934937	0.0901580942244472	0.0989826305653483	0.0458621754289867	0.0426079052019356	0.0445989747911476	0.0469005404474022	0.0453439910576904	0.170223738426432	0.0183285741096512	0.0219583946392575	0.0225991844646367	0.0434144537008317	0.0427021116531147	0.0376221669502773	0.0625730430850592	0.0488214470591063	0.0865854807175848	0.0425699681299163	0.0338285952232572	0.0329270996974944	0.0267740281751478	0.0740433580350474	0.0382902446173665	0.0419847939130553	0.0754286502386585	0.000747888360835947	0.0118208282741514
DCM - T065 - 594382	0.0260539320059961	0.103007276510441	0.117001997965347	0.103562378631224	0.0512433469222446	0.133563399414821	0.12357440418657	0.066726234341279	0.0620426711737819	0.0703191120341798	0.0393397951890237	0.014664089756365	0.111941882293634	0.11358655731501	0.11154643826786	0	0.00853422880723798	0.150354121984708	0.154657273764426	0.00936162340783236	0.0932847156125676	0.0895234678743665	0.0213883440434129	0.0125638077025119	0.0656842628388734	0.0689385330659246	0.0669474634767125	0.0646458978204579	0.0662024472101698	0.0586773001585718	0.129875012377511	0.133504832907118	0.134145622732497	0.0681319845670284	0.0688443266147455	0.0739242713175828	0.048973395182801	0.0627249912087539	0.0249609575502753	0.154116406397776	0.145375033491117	0.0786193385703657	0.138320466443008	0.0375030802328128	0.149836682885227	0.153531232180915	0.186975088506519	0.110798549907024	0.0997256099937087
DCM - T065 - 594414	0.0345881608132341	0.094473047703203	0.108467769158109	0.0950281498239858	0.0597775757294826	0.125029170607583	0.115040175379332	0.058192005534041	0.053508442366544	0.0617848832269419	0.0308055663817857	0.00612986094912699	0.103407653486396	0.105052328507772	0.103012209460622	0.00853422880723798	0	0.14181989317747	0.146123044957188	0.000827394600594389	0.0847504868053296	0.0809892390671285	0.012854115236175	0.00402957889527389	0.0571500340316354	0.0604043042586866	0.0584132346694746	0.05611166901322	0.0576682184029318	0.0672115289658097	0.121340783570273	0.12497060409988	0.125611393925259	0.0595977557597904	0.0603100978075075	0.0653900425103449	0.040439166375563	0.0541907624015159	0.0164267287430374	0.145582177590538	0.136840804683879	0.0700851097631278	0.12978623763577	0.0289688514255748	0.141302454077989	0.144997003373677	0.178440859699281	0.102264321099786	0.0911913811864707
MES - T065 - 598960	0.176408053990704	0.0473468454742672	0.0333521240193611	0.0467917433534843	0.201597468906953	0.0167907225698875	0.0267797177981383	0.0836278876434291	0.0883114508109262	0.0800350099505283	0.111014326795684	0.135690032228343	0.0384122396910741	0.0367675646696982	0.038807683716848	0.150354121984708	0.14181989317747	0	0.00430315177971774	0.140992498576876	0.0570694063721405	0.0608306541103416	0.128965777941295	0.137790314282196	0.0846698591458347	0.0814155889187835	0.0834066585079956	0.0857082241642502	0.0841516747745383	0.20903142214328	0.0204791096071968	0.0168492890775904	0.0162084992522112	0.0822221374176797	0.0815097953699626	0.0764298506671253	0.101380726801907	0.0876291307759542	0.125393164434433	0.00376228441306836	0.00497908849359074	0.0717347834143424	0.0120336555417001	0.112851041751895	0.000517439099481432	0.00317711019620737	0.0366209665218106	0.0395555720776839	0.0506285119909994
MES - T065 - 599034	0.180711205770422	0.0516499972539849	0.0376552757990788	0.0510948951332021	0.20590062068667	0.0210938743496052	0.031082869577856	0.0879310394231468	0.0926146025906439	0.084338161730246	0.115317478575402	0.139993184008061	0.0427153914707918	0.041070716449416	0.0431108354965657	0.154657273764426	0.146123044957188	0.00430315177971774	0	0.145295650356593	0.0613725581518583	0.0651338058900593	0.133268929721013	0.142093466061914	0.0889730109255524	0.0857187406985013	0.0877098102877133	0.0900113759439679	0.0884548265542561	0.213334573922998	0.0247822613869145	0.0211524408573082	0.020511651031929	0.0865252891973974	0.0858129471496804	0.080733002446843	0.105683878581625	0.091932282555672	0.129696316214151	0.000540867366649378	0.00928224027330848	0.0760379351940601	0.0163368073214178	0.117154193531613	0.00482059087919917	0.00112604158351037	0.0323178147420928	0.0438587238574016	0.0549316637707171
SRF - T065 - 594320	0.0354155554138285	0.0936456531026086	0.107640374557515	0.0942007552233914	0.060604970330077	0.124201776006988	0.114212780778737	0.0573646109334466	0.0526810477659496	0.0609574886263475	0.0299781717811913	0.0053024663485326	0.102580258885802	0.104224933907178	0.102184814860028	0.00936162340783236	0.000827394600594389	0.140992498576876	0.145295650356593	0	0.0839230922047352	0.0801618444665341	0.0120267206355806	0.0032021842946795	0.056322639431041	0.0595769096580922	0.0575858400688802	0.0552842744126256	0.0568408238023374	0.0680389235664041	0.120513388969679	0.124143209499285	0.124783999324664	0.058770361159196	0.0594827032069131	0.0645626479097505	0.0396117717749686	0.0533633678009215	0.015599334142443	0.144754782989944	0.136013410083285	0.0692577151625334	0.128958843035176	0.0281414568249804	0.140475059477394	0.144169608773083	0.177613465098686	0.101436926499192	0.0903639865858764
SRF - T065 - 598979	0.119338647618564	0.00972256089787338	0.0237172823527795	0.0102776630186562	0.144528062534812	0.0402786838022531	0.0302896885740023	0.0265584812712886	0.0312420444387856	0.0229656035783877	0.0539449204235439	0.0786206258562026	0.0186571666810664	0.0203018417024423	0.0182617226552926	0.0932847156125676	0.0847504868053296	0.0570694063721405	0.0613725581518583	0.0839230922047352	0	0.00376124773820108	0.0718963715691546	0.0807209079100557	0.0276004527736942	0.024346182546643	0.026337252135855	0.0286388177921096	0.0270822684023978	0.151962015771139	0.0365902967649437	0.0402201172945501	0.0408609071199293	0.0251527310455392	0.0244403889978221	0.0193604442949847	0.0443113204297666	0.0305597244038137	0.0683237580622922	0.0608316907852089	0.0520903178785498	0.0146653770422018	0.0450357508304404	0.0557816353797548	0.0565519672726591	0.0602465165683479	0.0936903728939511	0.0175138342944566	0.00644089438114115
SRF - T065 - 599146	0.115577399880363	0.0134838086360745	0.0274785300909806	0.0140389107568573	0.140766814796611	0.0440399315404542	0.0340509363122034	0.0227972335330875	0.0274807967005846	0.0192043558401866	0.0501836726853428	0.0748593781180015	0.0224184144192675	0.0240630894406434	0.0220229703934937	0.0895234678743665	0.0809892390671285	0.0608306541103416	0.0651338058900593	0.0801618444665341	0.00376124773820108	0	0.0681351238309535	0.0769596601718546	0.0238392050354931	0.0205849348084419	0.0225760043976539	0.0248775700539086	0.0233210206641967	0.148200768032938	0.0403515445031448	0.0439813650327512	0.0446221548581304	0.0213914833073381	0.020679141259621	0.0155991965567837	0.0405500726915655	0.0267984766656126	0.0645625103240912	0.06459293852341	0.0558515656167509	0.0109041293040008	0.0487969985686415	0.0520203876415537	0.0603132150108602	0.064007764306549	0.0974516206321522	0.0212750820326577	0.0102021421193422
SRF - T065 - 594359	0.047442276049409	0.081618932467028	0.0956136539219341	0.0821740345878108	0.0726316909656576	0.112175055371408	0.102186060143157	0.0453378902978661	0.040654327130369	0.0489307679907669	0.0179514511456108	0.00672425428704798	0.0905535382502211	0.0921982132715969	0.0901580942244472	0.0213883440434129	0.012854115236175	0.128965777941295	0.133268929721013	0.0120267206355806	0.0718963715691546	0.0681351238309535	0	0.00882453634090108	0.0442959187954605	0.0475501890225116	0.0455591194332996	0.043257553777045	0.0448141031667568	0.0800656442019847	0.108486668334098	0.112116488863705	0.112757278689084	0.0467436405236155	0.0474559825713325	0.0525359272741699	0.027585051139388	0.0413366471653409	0.00357261350686239	0.132728062354364	0.123986689447704	0.0572309945269528	0.116932122399595	0.0161147361893998	0.128448338841814	0.132142888137503	0.165586744463106	0.0894102058636113	0.0783372659502958
SRF - T065 - 594361	0.038617739708508	0.0904434688079291	0.104438190262835	0.0909985709287119	0.0638071546247565	0.120999591712309	0.111010596484058	0.0541624266387671	0.0494788634712701	0.057755304331668	0.0267759874865118	0.0021002820538531	0.0993780745911221	0.101022749612498	0.0989826305653483	0.0125638077025119	0.00402957889527389	0.137790314282196	0.142093466061914	0.0032021842946795	0.0807209079100557	0.0769596601718546	0.00882453634090108	0	0.0531204551363615	0.0563747253634127	0.0543836557742007	0.0520820901179461	0.0536386395076579	0.0712411078610836	0.117311204674999	0.120941025204606	0.121581815029985	0.0555681768645165	0.0562805189122336	0.061360463615071	0.0364095874802891	0.050161183506242	0.0123971498477635	0.141552598695265	0.132811225788605	0.0660555308678539	0.125756658740496	0.0249392725303009	0.137272875182715	0.140967424478404	0.174411280804007	0.0982347422045123	0.0871618022911969
DCM - T068 - 599017	0.0917381948448695	0.0373230136715675	0.0513177351264736	0.0378781157923503	0.116927609761118	0.0678791365759472	0.0578901413476964	0.00104197150240559	0.00364159166509148	0.00463484919530643	0.0263444676498497	0.0510201730825084	0.0462576194547606	0.0479022944761365	0.0458621754289867	0.0656842628388734	0.0571500340316354	0.0846698591458347	0.0889730109255524	0.056322639431041	0.0276004527736942	0.0238392050354931	0.0442959187954605	0.0531204551363615	0	0.00325427022705116	0.00126320063783913	0.00103836501841548	0.00051818437129636	0.124361562997445	0.0641907495386379	0.0678205700682443	0.0684613598936235	0.00244772172815499	0.00316006377587208	0.00824000847870943	0.0167108676560724	0.00295927163011955	0.0407233052885981	0.0884321435589031	0.0796907706522439	0.0129350757314923	0.0726362036041346	0.0281811826060606	0.0841524200463533	0.0878469693420421	0.121290825667645	0.0451142870681508	0.0340413471548353
DCM - T068 - 599056	0.0949924650719207	0.0340687434445164	0.0480634648994225	0.0346238455652992	0.120181879988169	0.0646248663488961	0.0546358711206453	0.00221229872464557	0.00689586189214264	0.00138057896825527	0.0295987378769009	0.0542744433095596	0.0430033492277094	0.0446480242490853	0.0426079052019356	0.0689385330659246	0.0604043042586866	0.0814155889187835	0.0857187406985013	0.0595769096580922	0.024346182546643	0.0205849348084419	0.0475501890225116	0.0563747253634127	0.00325427022705116	0	0.00199106958921202	0.00429263524546664	0.0027360858557548	0.127615833224496	0.0609364793115867	0.0645662998411931	0.0652070896665723	0.000806548498896165	9.42064511790797e-05	0.00498573825165827	0.0199651378831236	0.00621354185717071	0.0439775755156492	0.0851778733318519	0.0764365004251928	0.00968080550444117	0.0693819333770834	0.0314354528331118	0.0808981498193021	0.0845926991149909	0.118036555440594	0.0418600168410996	0.0307870769277842
DCM - T068 - 599103	0.0930013954827086	0.0360598130337284	0.0500545344886345	0.0366149151545112	0.118190810398957	0.0666159359381081	0.0566269407098573	0.000221229135433543	0.00490479230293062	0.0033716485574673	0.0276076682876888	0.0522833737203476	0.0449944188169215	0.0466390938382973	0.0445989747911476	0.0669474634767125	0.0584132346694746	0.0834066585079956	0.0877098102877133	0.0575858400688802	0.026337252135855	0.0225760043976539	0.0455591194332996	0.0543836557742007	0.00126320063783913	0.00199106958921202	0	0.00230156565625461	0.000745016266542775	0.125624763635284	0.0629275489007988	0.0665573694304051	0.0671981592557843	0.00118452109031586	0.00189686313803294	0.00697680784087029	0.0179740682939116	0.00422247226795869	0.0419865059264372	0.0871689429210639	0.0784275700144048	0.0116718750936532	0.0713730029662955	0.0294443832438998	0.0828892194085141	0.0865837687042029	0.120027625029806	0.0438510864303117	0.0327781465169962
DCM - T068 - 594294	0.090699829826454	0.038361378689983	0.0523561001448891	0.0389164808107658	0.115889244742703	0.0689175015943627	0.0589285063661119	0.00208033652082107	0.002603226646676	0.00567321421372191	0.0253061026314342	0.049981808064093	0.0472959844731761	0.048940659494552	0.0469005404474022	0.0646458978204579	0.05611166901322	0.0857082241642502	0.0900113759439679	0.0552842744126256	0.0286388177921096	0.0248775700539086	0.043257553777045	0.0520820901179461	0.00103836501841548	0.00429263524546664	0.00230156565625461	0	0.00155654938971184	0.12332319797903	0.0652291145570534	0.0688589350866597	0.0694997249120389	0.00348608674657047	0.00419842879428756	0.0092783734971249	0.015672502637657	0.00192090661170408	0.0396849402701826	0.0894705085773185	0.0807291356706594	0.0139734407499078	0.0736745686225501	0.0271428175876451	0.0851907850647687	0.0888853343604575	0.122329190686061	0.0461526520865663	0.0350797121732508
DCM - T068 - 594348	0.0922563792161659	0.0368048293002712	0.0507995507551773	0.037359931421054	0.117445794132414	0.0673609522046509	0.0573719569764001	0.000523787131109232	0.00415977603638784	0.00411666482401007	0.0268626520211461	0.0515383574538048	0.0457394350834642	0.0473841101048401	0.0453439910576904	0.0662024472101698	0.0576682184029318	0.0841516747745383	0.0884548265542561	0.0568408238023374	0.0270822684023978	0.0233210206641967	0.0448141031667568	0.0536386395076579	0.00051818437129636	0.0027360858557548	0.000745016266542775	0.00155654938971184	0	0.124879747368742	0.0636725651673415	0.0673023856969479	0.0679431755223271	0.00192953735685863	0.00264187940457572	0.00772182410741307	0.0172290520273688	0.00347745600141591	0.0412414896598944	0.0879139591876067	0.0791725862809476	0.012416891360196	0.0721180192328382	0.028699366977357	0.0836342356750569	0.0873287849707457	0.120772641296349	0.0445961026968544	0.033523162783539
DCM - T068 - 594415	0.0326233681525757	0.161684576669013	0.175679298123919	0.162239678789796	0.00743395323632712	0.192240699573392	0.182251704345142	0.125403534499851	0.120719971332354	0.128996412192752	0.0980170953475955	0.0733413899149367	0.170619182452206	0.172263857473582	0.170223738426432	0.0586773001585718	0.0672115289658097	0.20903142214328	0.213334573922998	0.0680389235664041	0.151962015771139	0.148200768032938	0.0800656442019847	0.0712411078610836	0.124361562997445	0.127615833224496	0.125624763635284	0.12332319797903	0.124879747368742	0	0.188552312536083	0.192182133065689	0.192822922891069	0.1268092847256	0.127521626773317	0.132601571476155	0.107650695341373	0.121402291367326	0.0836382577088471	0.212793706556348	0.204052333649689	0.137296638728937	0.19699776660158	0.0961803803913845	0.208513983043798	0.212208532339487	0.24565238866509	0.169475850065596	0.15840291015228
MES - T068 - 598947	0.155928944383507	0.0268677358670704	0.0128730144121643	0.0263126337462876	0.181118359299756	0.00368838703730934	0.00630060819094147	0.0631487780362323	0.0678323412037294	0.0595559003433315	0.0905352171884876	0.115210922621146	0.0179331300838773	0.0162884550625014	0.0183285741096512	0.129875012377511	0.121340783570273	0.0204791096071968	0.0247822613869145	0.120513388969679	0.0365902967649437	0.0403515445031448	0.108486668334098	0.117311204674999	0.0641907495386379	0.0609364793115867	0.0629275489007988	0.0652291145570534	0.0636725651673415	0.188552312536083	0	0.00362982052960636	0.00427061035498555	0.0617430278104829	0.0610306857627658	0.0559507410599285	0.0809016171947103	0.0671500211687575	0.104914054827236	0.0242413940202652	0.015500021113606	0.0512556738071456	0.00844545406549668	0.0923719321446985	0.0199616705077154	0.0236562198034042	0.0571000761290074	0.0190764624704871	0.0301494023838026
MES - T068 - 599131	0.159558764913114	0.0304975563966767	0.0165028349417706	0.0299424542758939	0.184748179829362	5.85665077029729e-05	0.00993042872054783	0.0667785985658387	0.0714621617333357	0.0631857208729378	0.094165037718094	0.118840743150753	0.0215629506134837	0.0199182755921078	0.0219583946392575	0.133504832907118	0.12497060409988	0.0168492890775904	0.0211524408573082	0.124143209499285	0.0402201172945501	0.0439813650327512	0.112116488863705	0.120941025204606	0.0678205700682443	0.0645662998411931	0.0665573694304051	0.0688589350866597	0.0673023856969479	0.192182133065689	0.00362982052960636	0	0.000640789825379184	0.0653728483400893	0.0646605062923722	0.0595805615895348	0.0845314377243167	0.0707798416983638	0.108543875356842	0.0206115734906588	0.0118702005839997	0.0548854943367519	0.00481563353589032	0.0960017526743049	0.016331849978109	0.0200263992737978	0.053470255599401	0.0227062830000935	0.033779222913409
MES - T068 - 594302	0.160199554738493	0.0311383462220559	0.0171436247671498	0.0305832441012731	0.185388969654741	0.000582223317676211	0.010571218545927	0.0674193883912179	0.0721029515587149	0.063826510698317	0.0948058275434732	0.119481532976132	0.0222037404388629	0.020559065417487	0.0225991844646367	0.134145622732497	0.125611393925259	0.0162084992522112	0.020511651031929	0.124783999324664	0.0408609071199293	0.0446221548581304	0.112757278689084	0.121581815029985	0.0684613598936235	0.0652070896665723	0.0671981592557843	0.0694997249120389	0.0679431755223271	0.192822922891069	0.00427061035498555	0.000640789825379184	0	0.0660136381654685	0.0653012961177514	0.060221351414914	0.0851722275496959	0.071420631523743	0.109184665182222	0.0199707836652796	0.0112294107586205	0.0555262841621311	0.00417484371051113	0.0966425424996841	0.0156910601527298	0.0193856094484186	0.0528294657740218	0.0233470728254727	0.0344200127387881
SRF - T068 - 599129	0.0941859165730245	0.0348752919434125	0.0488700133983186	0.0354303940641953	0.119375331489273	0.0654314148477922	0.0554424196195414	0.0014057502257494	0.00608931339324648	0.00218712746715144	0.0287921893780047	0.0534678948106634	0.0438098977266056	0.0454545727479815	0.0434144537008317	0.0681319845670284	0.0595977557597904	0.0822221374176797	0.0865252891973974	0.058770361159196	0.0251527310455392	0.0213914833073381	0.0467436405236155	0.0555681768645165	0.00244772172815499	0.000806548498896165	0.00118452109031586	0.00348608674657047	0.00192953735685863	0.1268092847256	0.0617430278104829	0.0653728483400893	0.0660136381654685	0	0.000712342047717085	0.00579228675055443	0.0191585893842274	0.00540699335827455	0.0431710270167531	0.0859844218307481	0.077243048924089	0.0104873540033373	0.0701884818759796	0.0306289043342156	0.0817046983181983	0.0853992476138871	0.11884310393949	0.0426665653399958	0.0315936254266803
SRF - T068 - 599171	0.0948982586207416	0.0341629498956955	0.0481576713506016	0.0347180520164783	0.12008767353699	0.0647190728000752	0.0547300775718244	0.00211809227346649	0.00680165544096356	0.00147478541943435	0.0295045314257218	0.0541802368583805	0.0430975556788885	0.0447422307002644	0.0427021116531147	0.0688443266147455	0.0603100978075075	0.0815097953699626	0.0858129471496804	0.0594827032069131	0.0244403889978221	0.020679141259621	0.0474559825713325	0.0562805189122336	0.00316006377587208	9.42064511790797e-05	0.00189686313803294	0.00419842879428756	0.00264187940457572	0.127521626773317	0.0610306857627658	0.0646605062923722	0.0653012961177514	0.000712342047717085	0	0.00507994470283735	0.0198709314319445	0.00611933540599163	0.0438833690644702	0.085272079783031	0.0765307068763719	0.00977501195562025	0.0694761398282625	0.0313412463819327	0.0809923562704812	0.08468690556617	0.118130761891773	0.0419542232922787	0.0308812833789632
SRF - T068 - 599174	0.0999782033235789	0.0290830051928581	0.0430777266477642	0.0296381073136409	0.125167618239827	0.0596391280972378	0.049650132868987	0.00719803697630383	0.0118816001438009	0.00360515928340299	0.0345844761285591	0.0592601815612179	0.0380176109760512	0.039662285997427	0.0376221669502773	0.0739242713175828	0.0653900425103449	0.0764298506671253	0.080733002446843	0.0645626479097505	0.0193604442949847	0.0155991965567837	0.0525359272741699	0.061360463615071	0.00824000847870943	0.00498573825165827	0.00697680784087029	0.0092783734971249	0.00772182410741307	0.132601571476155	0.0559507410599285	0.0595805615895348	0.060221351414914	0.00579228675055443	0.00507994470283735	0	0.0249508761347819	0.011199280108829	0.0489633137673075	0.0801921350801936	0.0714507621735345	0.0046950672527829	0.0643961951254252	0.03642119108477	0.0759124115676438	0.0796069608633326	0.113050817188936	0.0368742785894414	0.0258013386761259
SRF - T068 - 594318	0.0750273271887971	0.05403388132764	0.0680286027825461	0.0545889834484228	0.100216742105046	0.0845900042320197	0.0746010090037689	0.017752839158478	0.013069275990981	0.0213457168513789	0.00963359999377728	0.034309305426436	0.062968487110833	0.0646131621322089	0.0625730430850592	0.048973395182801	0.040439166375563	0.101380726801907	0.105683878581625	0.0396117717749686	0.0443113204297666	0.0405500726915655	0.027585051139388	0.0364095874802891	0.0167108676560724	0.0199651378831236	0.0179740682939116	0.015672502637657	0.0172290520273688	0.107650695341373	0.0809016171947103	0.0845314377243167	0.0851722275496959	0.0191585893842274	0.0198709314319445	0.0249508761347819	0	0.0137515960259529	0.0240124376325256	0.105143011214975	0.0964016383083164	0.0296459433875648	0.089347071260207	0.0114703149499882	0.100863287702426	0.104557836998114	0.138001693323718	0.0618251547242232	0.0507522148109077
SRF - T068 - 594297	0.0887789232147499	0.0402822853016871	0.0542770067565932	0.0408373874224699	0.113968338130998	0.0708384082060668	0.060849412977816	0.00400124313252515	0.000682320034971928	0.00759412082542599	0.0233851960197302	0.0480609014523889	0.0492168910848801	0.050861566106256	0.0488214470591063	0.0627249912087539	0.0541907624015159	0.0876291307759542	0.091932282555672	0.0533633678009215	0.0305597244038137	0.0267984766656126	0.0413366471653409	0.050161183506242	0.00295927163011955	0.00621354185717071	0.00422247226795869	0.00192090661170408	0.00347745600141591	0.121402291367326	0.0671500211687575	0.0707798416983638	0.071420631523743	0.00540699335827455	0.00611933540599163	0.011199280108829	0.0137515960259529	0	0.0377640336584785	0.0913914151890226	0.0826500422823635	0.0158943473616119	0.0755954752342541	0.0252219109759411	0.0871116916764728	0.0908062409721616	0.124250097297765	0.0480735586982703	0.0370006187849549
SRF - T068 - 594391	0.0510148895562714	0.0780463189601656	0.0920410404150717	0.0786014210809484	0.07620430447252	0.108602441864545	0.0986134466362945	0.0417652767910037	0.0370817136235066	0.0453581544839045	0.0143788376387484	0.0102968677939104	0.0869809247433587	0.0886255997647346	0.0865854807175848	0.0249609575502753	0.0164267287430374	0.125393164434433	0.129696316214151	0.015599334142443	0.0683237580622922	0.0645625103240912	0.00357261350686239	0.0123971498477635	0.0407233052885981	0.0439775755156492	0.0419865059264372	0.0396849402701826	0.0412414896598944	0.0836382577088471	0.104914054827236	0.108543875356842	0.109184665182222	0.0431710270167531	0.0438833690644702	0.0489633137673075	0.0240124376325256	0.0377640336584785	0	0.129155448847501	0.120414075940842	0.0536583810200904	0.113359508892733	0.0125421226825375	0.124875725334951	0.12857027463064	0.162014130956243	0.0858375923567489	0.0747646524434334
DCM - T076 - 599040	0.180170338403773	0.0511091298873355	0.0371144084324294	0.0505540277665527	0.205359753320021	0.0205530069829558	0.0305420022112066	0.0873901720564975	0.0920737352239945	0.0837972943635966	0.114776611208753	0.139452316641412	0.0421745241041425	0.0405298490827666	0.0425699681299163	0.154116406397776	0.145582177590538	0.00376228441306836	0.000540867366649378	0.144754782989944	0.0608316907852089	0.06459293852341	0.132728062354364	0.141552598695265	0.0884321435589031	0.0851778733318519	0.0871689429210639	0.0894705085773185	0.0879139591876067	0.212793706556348	0.0242413940202652	0.0206115734906588	0.0199707836652796	0.0859844218307481	0.085272079783031	0.0801921350801936	0.105143011214975	0.0913914151890226	0.129155448847501	0	0.00874137290665911	0.0754970678274107	0.0157959399547685	0.116613326164964	0.00427972351254979	0.000585174216860995	0.0328586821087422	0.0433178564907523	0.0543907964040677
DCM - T076 - 599148	0.171428965497113	0.0423677569806764	0.0283730355257703	0.0418126548598936	0.196618380413362	0.0118116340762967	0.0218006293045475	0.0786487991498384	0.0833323623173354	0.0750559214569375	0.106035238302094	0.130710943734752	0.0334331511974834	0.0317884761761075	0.0338285952232572	0.145375033491117	0.136840804683879	0.00497908849359074	0.00928224027330848	0.136013410083285	0.0520903178785498	0.0558515656167509	0.123986689447704	0.132811225788605	0.0796907706522439	0.0764365004251928	0.0784275700144048	0.0807291356706594	0.0791725862809476	0.204052333649689	0.015500021113606	0.0118702005839997	0.0112294107586205	0.077243048924089	0.0765307068763719	0.0714507621735345	0.0964016383083164	0.0826500422823635	0.120414075940842	0.00874137290665911	0	0.0667556949207516	0.00705456704810936	0.107871953258305	0.00446164939410931	0.00815619868979811	0.0416000550154013	0.0345764835840932	0.0456494234974086
DCM - T076 - 594321	0.104673270576362	0.0243879379400752	0.0383826593949813	0.024943040060858	0.12986268549261	0.0549440608444549	0.0449550656162041	0.0118931042290867	0.0165766673965838	0.0083002265361859	0.039279543381342	0.0639552488140008	0.0333225437232683	0.0349672187446441	0.0329270996974944	0.0786193385703657	0.0700851097631278	0.0717347834143424	0.0760379351940601	0.0692577151625334	0.0146653770422018	0.0109041293040008	0.0572309945269528	0.0660555308678539	0.0129350757314923	0.00968080550444117	0.0116718750936532	0.0139734407499078	0.012416891360196	0.137296638728937	0.0512556738071456	0.0548854943367519	0.0555262841621311	0.0104873540033373	0.00977501195562025	0.0046950672527829	0.0296459433875648	0.0158943473616119	0.0536583810200904	0.0754970678274107	0.0667556949207516	0	0.0597011278726423	0.0411162583375529	0.0712173443148609	0.0749118936105497	0.108355749936153	0.0321792113366585	0.021106271423343
DCM - T076 - 594298	0.164374398449004	0.035313189932567	0.0213184684776609	0.0347580878117842	0.189563813365253	0.00475706702818735	0.0147460622564382	0.071594232101729	0.0762777952692261	0.0680013544088282	0.0989806712539843	0.123656376686643	0.026378584149374	0.0247339091279981	0.0267740281751478	0.138320466443008	0.12978623763577	0.0120336555417001	0.0163368073214178	0.128958843035176	0.0450357508304404	0.0487969985686415	0.116932122399595	0.125756658740496	0.0726362036041346	0.0693819333770834	0.0713730029662955	0.0736745686225501	0.0721180192328382	0.19699776660158	0.00844545406549668	0.00481563353589032	0.00417484371051113	0.0701884818759796	0.0694761398282625	0.0643961951254252	0.089347071260207	0.0755954752342541	0.113359508892733	0.0157959399547685	0.00705456704810936	0.0597011278726423	0	0.100817386210195	0.0115162164422187	0.0152107657379075	0.0486546220635107	0.0275219165359838	0.0385948564492993
DCM - T076 - 594355	0.0635570122388089	0.0655041962776282	0.0794989177325343	0.066059298398411	0.0887464271550574	0.0960603191820079	0.0860713239537571	0.0292231541084662	0.0245395909409691	0.0328160318013671	0.00183671495621091	0.0228389904764478	0.0744388020608212	0.0760834770821971	0.0740433580350474	0.0375030802328128	0.0289688514255748	0.112851041751895	0.117154193531613	0.0281414568249804	0.0557816353797548	0.0520203876415537	0.0161147361893998	0.0249392725303009	0.0281811826060606	0.0314354528331118	0.0294443832438998	0.0271428175876451	0.028699366977357	0.0961803803913845	0.0923719321446985	0.0960017526743049	0.0966425424996841	0.0306289043342156	0.0313412463819327	0.03642119108477	0.0114703149499882	0.0252219109759411	0.0125421226825375	0.116613326164964	0.107871953258305	0.0411162583375529	0.100817386210195	0	0.112333602652414	0.116028151948103	0.149472008273706	0.0732954696742114	0.0622225297608959
MES - T076 - 599000	0.175890614891223	0.0468294063747857	0.0328346849198796	0.0462743042540029	0.201080029807471	0.016273283470406	0.0262622786986568	0.0831104485439477	0.0877940117114447	0.0795175708510468	0.110496887696203	0.135172593128862	0.0378948005915927	0.0362501255702168	0.0382902446173665	0.149836682885227	0.141302454077989	0.000517439099481432	0.00482059087919917	0.140475059477394	0.0565519672726591	0.0603132150108602	0.128448338841814	0.137272875182715	0.0841524200463533	0.0808981498193021	0.0828892194085141	0.0851907850647687	0.0836342356750569	0.208513983043798	0.0199616705077154	0.016331849978109	0.0156910601527298	0.0817046983181983	0.0809923562704812	0.0759124115676438	0.100863287702426	0.0871116916764728	0.124875725334951	0.00427972351254979	0.00446164939410931	0.0712173443148609	0.0115162164422187	0.112333602652414	0	0.0036945492956888	0.037138405621292	0.0390381329782025	0.0501110728915179
MES - T076 - 599154	0.179585164186912	0.0505239556704745	0.0365292342155684	0.0499688535496917	0.20477457910316	0.0199678327660948	0.0299568279943456	0.0868049978396365	0.0914885610071335	0.0832121201467356	0.114191436991892	0.138867142424551	0.0415893498872815	0.0399446748659056	0.0419847939130553	0.153531232180915	0.144997003373677	0.00317711019620737	0.00112604158351037	0.144169608773083	0.0602465165683479	0.064007764306549	0.132142888137503	0.140967424478404	0.0878469693420421	0.0845926991149909	0.0865837687042029	0.0888853343604575	0.0873287849707457	0.212208532339487	0.0236562198034042	0.0200263992737978	0.0193856094484186	0.0853992476138871	0.08468690556617	0.0796069608633326	0.104557836998114	0.0908062409721616	0.12857027463064	0.000585174216860995	0.00815619868979811	0.0749118936105497	0.0152107657379075	0.116028151948103	0.0036945492956888	0	0.0334438563256032	0.0427326822738913	0.0538056221872067
MES - T076 - 594333	0.213029020512515	0.0839678119960777	0.0699730905411716	0.0834127098752949	0.238218435428763	0.053411689091698	0.0634006843199488	0.12024885416524	0.124932417332737	0.116655976472339	0.147635293317495	0.172310998750154	0.0750332062128847	0.0733885311915088	0.0754286502386585	0.186975088506519	0.178440859699281	0.0366209665218106	0.0323178147420928	0.177613465098686	0.0936903728939511	0.0974516206321522	0.165586744463106	0.174411280804007	0.121290825667645	0.118036555440594	0.120027625029806	0.122329190686061	0.120772641296349	0.24565238866509	0.0571000761290074	0.053470255599401	0.0528294657740218	0.11884310393949	0.118130761891773	0.113050817188936	0.138001693323718	0.124250097297765	0.162014130956243	0.0328586821087422	0.0416000550154013	0.108355749936153	0.0486546220635107	0.149472008273706	0.037138405621292	0.0334438563256032	0	0.0761765385994945	0.08724947851281
SRF - T076 - 599010	0.13685248191302	0.00779127339658325	0.00620344805832285	0.00723617127580045	0.162041896829269	0.0227648495077964	0.0127758542795456	0.0440723155657452	0.0487558787332423	0.0404794378728444	0.0714587547180005	0.0961344601506592	0.0011433323866098	0.00278800740798568	0.000747888360835947	0.110798549907024	0.102264321099786	0.0395555720776839	0.0438587238574016	0.101436926499192	0.0175138342944566	0.0212750820326577	0.0894102058636113	0.0982347422045123	0.0451142870681508	0.0418600168410996	0.0438510864303117	0.0461526520865663	0.0445961026968544	0.169475850065596	0.0190764624704871	0.0227062830000935	0.0233470728254727	0.0426665653399958	0.0419542232922787	0.0368742785894414	0.0618251547242232	0.0480735586982703	0.0858375923567489	0.0433178564907523	0.0345764835840932	0.0321792113366585	0.0275219165359838	0.0732954696742114	0.0390381329782025	0.0427326822738913	0.0761765385994945	0	0.0110729399133155
SRF - T076 - 599126	0.125779541999705	0.00328166651673223	0.0172763879716383	0.00383676863751503	0.150968956915953	0.0338377894211119	0.0238487941928611	0.0329993756524297	0.0376829388199268	0.0294064979595289	0.060385814804685	0.0850615202373438	0.0122162722999253	0.0138609473213012	0.0118208282741514	0.0997256099937087	0.0911913811864707	0.0506285119909994	0.0549316637707171	0.0903639865858764	0.00644089438114115	0.0102021421193422	0.0783372659502958	0.0871618022911969	0.0340413471548353	0.0307870769277842	0.0327781465169962	0.0350797121732508	0.033523162783539	0.15840291015228	0.0301494023838026	0.033779222913409	0.0344200127387881	0.0315936254266803	0.0308812833789632	0.0258013386761259	0.0507522148109077	0.0370006187849549	0.0747646524434334	0.0543907964040677	0.0456494234974086	0.021106271423343	0.0385948564492993	0.0622225297608959	0.0501110728915179	0.0538056221872067	0.08724947851281	0.0110729399133155	0
SRF - T076 - 594310	0.0801061956793257	0.0489550128371113	0.0629497342920174	0.0495101149578941	0.105295610595574	0.079511135741491	0.0695221405132402	0.0126739706679494	0.00799040750045232	0.0162668483608502	0.0147124684843059	0.0393881739169646	0.0578896186203044	0.0595342936416803	0.0574941745945305	0.0540522636733296	0.0455180348660916	0.0963018583113785	0.100605010091096	0.0446906402654972	0.039232451939238	0.0354712042010369	0.0326639196299167	0.0414884559708177	0.0116319991655438	0.014886269392595	0.0128951998033829	0.0105936341471283	0.0121501835368402	0.112729563831901	0.0758227487041817	0.0794525692337881	0.0800933590591673	0.0140797208936988	0.0147920629414159	0.0198720076442532	0.00507886849052863	0.00867272753542425	0.0290913061230543	0.100064142724447	0.0913227698177878	0.0245670748970361	0.0842682027696784	0.0165491834405168	0.0957844192118971	0.0994789685075859	0.132922824833189	0.0567462862336946	0.0456733463203791
SRF - T076 - 594286	0.109056237401705	0.0200049711147319	0.033999692569638	0.0205600732355147	0.134245652317954	0.0505610940191116	0.0405720987908608	0.0162760710544301	0.0209596342219271	0.0126831933615292	0.0436625102066854	0.0683382156393441	0.0289395768979249	0.0305842519193008	0.0285441328721511	0.0830023053957091	0.0744680765884711	0.067351816588999	0.0716549683687168	0.0736406819878767	0.0102824102168585	0.00652116247865742	0.0616139613522961	0.0704384976931972	0.0173180425568357	0.0140637723297845	0.0160548419189965	0.0183564075752511	0.0167998581855393	0.141679605554281	0.0468727069818022	0.0505025275114086	0.0511433173367878	0.0148703208286807	0.0141579787809636	0.00907803407812624	0.0340289102129081	0.0202773141869552	0.0580413478454337	0.0711141010020674	0.0623727280954083	0.00438296682534334	0.0553181610472989	0.0454992251628963	0.0668343774895176	0.0705289267852064	0.10397278311081	0.0277962445113151	0.0167233045979996
SRF - T076 - 594354	0.074130020271355	0.054931188245082	0.0689259096999881	0.0554862903658648	0.0993194351876036	0.0854873111494617	0.0754983159212109	0.0186501460759201	0.013966582908423	0.0222430237688209	0.00873629307633522	0.033411998508994	0.0638657940282751	0.065510469049651	0.0634703500025012	0.0480760882653589	0.0395418594581209	0.102278033719349	0.106581185499067	0.0387144648575266	0.0452086273472087	0.0414473796090076	0.026687744221946	0.0355122805628471	0.0176081745735145	0.0208624448005656	0.0188713752113536	0.016569809555099	0.0181263589448108	0.106753388423931	0.0817989241121524	0.0854287446417588	0.0860695344671379	0.0200558963016695	0.0207682383493866	0.0258481830522239	0.000897306917442053	0.0146489029433949	0.0231151307150836	0.106040318132418	0.0972989452257584	0.0305432503050068	0.0902443781776491	0.0105730080325461	0.101760594619868	0.105455143915557	0.13889900024116	0.0627224616416653	0.0516495217283498
DCM - T078 - 599046	0.146483432302448	0.0174222237860112	0.00342750233110511	0.0168671216652284	0.171672847218697	0.0131338991183685	0.00314490389011768	0.0537032659551732	0.0583868291226702	0.0501103882622723	0.0810897051074285	0.105765410540087	0.00848761800281816	0.00684294298144228	0.00888306202859201	0.120429500296452	0.111895271489214	0.0299246216882559	0.0342277734679737	0.11106787688862	0.0271447846838846	0.0309060324220857	0.0990411562530392	0.10786569259394	0.0547452374575788	0.0514909672305276	0.0534820368197396	0.0557836024759942	0.0542270530862824	0.179106800455024	0.00944551208105915	0.0130753326106655	0.0137161224360447	0.0522975157294238	0.0515851736817067	0.0465052289788693	0.0714561051136512	0.0577045090876983	0.0954685427461768	0.0336869061013243	0.0249455331946652	0.0418101617260864	0.0178909661465558	0.0829264200636394	0.0294071825887745	0.0331017318844633	0.0665455882100665	0.00963095038942796	0.0207038903027434
DCM - T078 - 599101	0.143288278285491	0.0142270697690535	0.000232348314147424	0.0136719676482707	0.168477693201739	0.0163290531353262	0.00634005790707537	0.0505081119382155	0.0551916751057125	0.0469152342453146	0.0778945510904708	0.10257025652313	0.00529246398586047	0.00364778896448459	0.00568790801163432	0.117234346279494	0.108700117472256	0.0331197757052136	0.0374229274849314	0.107872722871662	0.0239496306669269	0.027710878405128	0.0958460022360815	0.104670538576983	0.0515500834406211	0.0482958132135699	0.0502868828027819	0.0525884484590365	0.0510318990693247	0.175911646438066	0.0126406660980168	0.0162704866276232	0.0169112764530024	0.0491023617124661	0.048390019664749	0.0433100749619116	0.0682609510966935	0.0545093550707406	0.0922733887292191	0.036882060118282	0.0281406872116229	0.0386150077091287	0.0210861201635135	0.0797312660466817	0.0326023366057322	0.036296885901421	0.0697407422270242	0.00643579637247027	0.0175087362857858
DCM - T078 - 594336	0.100410320811212	0.0286508877052251	0.0426456091601312	0.0292059898260079	0.125599735727461	0.0592070106096048	0.049218015381354	0.00763015446393689	0.012313717631434	0.00403727677103605	0.0350165936161922	0.0596922990488509	0.0375854934884181	0.039230168509794	0.0371900494626443	0.0743563888052159	0.0658221599979779	0.0759977331794922	0.08030088495921	0.0649947653973835	0.0189283268073517	0.0151670790691506	0.0529680447618029	0.061792581102704	0.00867212596634248	0.00541785573929132	0.00740892532850335	0.00971049098475796	0.00815394159504612	0.133033688963788	0.0555186235722954	0.0591484441019018	0.059789233927281	0.00622440423818749	0.0055120621904704	0.000432117487633055	0.0253829936224149	0.011631397596462	0.0493954312549406	0.0797600175925606	0.0710186446859015	0.00426294976514985	0.0639640776377921	0.0368533085724031	0.0754802940800108	0.0791748433756996	0.112618699701303	0.0364421611018083	0.0253692211884928
DCM - T078 - 594303	0.119074279914283	0.00998692860215378	0.0239816500570599	0.0105420307229366	0.144263694830532	0.0405430515065335	0.0305540562782827	0.0262941135670082	0.0309776767345052	0.0227012358741073	0.0536805527192635	0.0783562581519222	0.0189215343853468	0.0205662094067227	0.018526090359573	0.0930203479082872	0.0844861191010492	0.0573337740764209	0.0616369258561387	0.0836587245004548	0.000264367704280399	0.00349688003392068	0.0716320038648742	0.0804565402057753	0.0273360850694138	0.0240818148423626	0.0260728844315746	0.0283744500878292	0.0268179006981174	0.151697648066859	0.0368546644692241	0.0404844849988305	0.0411252748242097	0.0248883633412588	0.0241760212935417	0.0190960765907043	0.0440469527254862	0.0302953566995333	0.0680593903580118	0.0610960584894893	0.0523546855828302	0.0144010093379214	0.0453001185347208	0.0555172676754744	0.0568163349769395	0.0605108842726283	0.0939547405982315	0.017778201998737	0.00670526208542155
MES - T078 - 599124	0.1854460949894	0.0563848864729631	0.042390165018057	0.0558297843521803	0.210635509905649	0.0258287635685834	0.0358177587968342	0.0926659286421251	0.0973494918096222	0.0890730509492242	0.12005236779438	0.144728073227039	0.0474502806897701	0.0458056056683942	0.0478457247155439	0.159392162983404	0.150857934176166	0.00903804099869598	0.00473488921897824	0.150030539575572	0.0661074473708365	0.0698686951090376	0.138003818939991	0.146828355280892	0.0937079001445307	0.0904536299174795	0.0924446995066915	0.0947462651629462	0.0931897157732343	0.218069463141976	0.0295171506058928	0.0258873300762864	0.0252465402509072	0.0912601784163757	0.0905478363686586	0.0854678916658212	0.110418767800603	0.0966671717746502	0.134431205433129	0.00527575658562762	0.0140171294922867	0.0807728244130383	0.0210716965403961	0.121889082750591	0.00955548009817742	0.00586093080248862	0.0275829255231146	0.0485936130763799	0.0596665529896954
MES - T078 - 599159	0.17260047506612	0.0435392665496832	0.0295445450947771	0.0429841644289004	0.197789889982369	0.0129831436453035	0.0229721388735543	0.0798203087188452	0.0845038718863422	0.0762274310259443	0.1072067478711	0.131882453303759	0.0346046607664902	0.0329599857451143	0.035000104792264	0.146546543060124	0.138012314252886	0.00380757892458394	0.00811073070430168	0.137184919652292	0.0532618274475566	0.0570230751857577	0.125158199016711	0.133982735357612	0.0808622802212507	0.0776080099941996	0.0795990795834116	0.0819006452396662	0.0803440958499544	0.205223843218696	0.0166715306826128	0.0130417101530065	0.0124009203276273	0.0784145584930958	0.0777022164453787	0.0726222717425413	0.0975731478773232	0.0838215518513703	0.121585585509849	0.00756986333765231	0.0011715095690068	0.0679272044897584	0.00822607661711616	0.109043462827311	0.00329013982510251	0.00698468912079131	0.0404285454463945	0.0357479931531	0.0468209330664154
MES - T078 - 594289	0.181786643277138	0.0527254347607009	0.0387307133057948	0.0521703326399181	0.206976058193386	0.0221693118563212	0.032158307084572	0.0890064769298629	0.0936900400973599	0.085413599236962	0.116392916082118	0.141068621514777	0.0437908289775079	0.042146153956132	0.0441862730032817	0.155732711271142	0.147198482463904	0.00537858928643375	0.00107543750671601	0.146371087863309	0.0624479956585743	0.0662092433967754	0.134344367227729	0.14316890356863	0.0900484484322684	0.0867941782052173	0.0887852477944293	0.0910868134506839	0.0895302640609721	0.214410011429714	0.0258576988936305	0.0222278783640242	0.021587088538645	0.0876007267041135	0.0868883846563964	0.081808439953559	0.106759316088341	0.093007720062388	0.130771753720867	0.00161630487336539	0.0103576777800245	0.0771133727007761	0.0174122448281339	0.118229631038329	0.00589602838591519	0.00220147909022639	0.0312423772353768	0.0449341613641177	0.0560071012774331
SRF - T078 - 599006	0.0886299710643091	0.040431237452128	0.0544259589070341	0.0409863395729108	0.113819385980558	0.0709873603565077	0.0609983651282568	0.00415019528296601	0.000533367884531066	0.00774307297586685	0.0232362438692893	0.047911949301948	0.049365843235321	0.0510105182566969	0.0489703992095472	0.062576039058313	0.054041810251075	0.0877780829263951	0.0920812347061128	0.0532144156504806	0.0307086765542546	0.0269474288160535	0.0411876950149	0.0500122313558011	0.00310822378056042	0.00636249400761157	0.00437142441839955	0.00206985876214494	0.00362640815185677	0.121253339216885	0.0672989733191983	0.0709287938488047	0.0715695836741839	0.00555594550871541	0.00626828755643249	0.0113482322592698	0.013602643875512	0.000148952150440862	0.0376150815080377	0.0915403673394635	0.0827989944328044	0.0160432995120527	0.075744427384695	0.0250729588255002	0.0872606438269137	0.0909551931226025	0.124399049448206	0.0482225108487112	0.0371495709353957
SRF - T078 - 599022	0.102470862710423	0.0265903458060142	0.0405850672609203	0.027145447926797	0.127660277626671	0.0571464687103939	0.0471574734821431	0.00969069636314779	0.0143742595306449	0.00609781867024695	0.0370771355154031	0.0617528409480618	0.0355249515892072	0.0371696266105831	0.0351295075634334	0.0764169307044268	0.0678827018971888	0.0739371912802813	0.0782403430599991	0.0670553072965944	0.0168677849081408	0.0131065371699397	0.0550285866610138	0.0638531230019149	0.0107326678655534	0.00747839763850222	0.00946946722771425	0.0117710328839689	0.010214483494257	0.135094230862999	0.0534580816730845	0.0570879022026909	0.0577286920280701	0.00828494613739839	0.0075726040896813	0.00249265938684395	0.0274435355216258	0.0136919394956729	0.0514559731541515	0.0776994756933497	0.0689581027866906	0.00220240786593895	0.0619035357385812	0.038913850471614	0.0734197521807999	0.0771143014764887	0.110558157802092	0.0343816192025974	0.0233086792892819
SRF - T078 - 594340	0.0754335473693009	0.0536276611471361	0.0676223826020422	0.0541827632679189	0.100622962285549	0.0841837840515158	0.074194788823265	0.0173466189779742	0.0126630558104771	0.020939496670875	0.0100398201742811	0.0347155256069399	0.0625622669303292	0.0642069419517051	0.0621668229045553	0.0493796153633048	0.0408453865560668	0.100974506621403	0.105277658401121	0.0400179919554725	0.0439051002492628	0.0401438525110617	0.0279912713198919	0.036815807660793	0.0163046474755686	0.0195589177026197	0.0175678481134077	0.0152662824571531	0.0168228318468649	0.108056915521877	0.0804953970142065	0.0841252175438129	0.084766007369192	0.0187523692037236	0.0194647112514407	0.024544655954278	0.000406220180503847	0.013345375845449	0.0244186578130295	0.104736791034472	0.0959954181278125	0.0292397232070609	0.0889408510797032	0.011876535130492	0.100457067521922	0.104151616817611	0.137595473143214	0.0614189345437194	0.0503459946304039
SRF - T078 - 594332	0.0791848201160235	0.0498763884004135	0.0638711098553196	0.0504314905211963	0.104374235032272	0.0804325113047932	0.0704435160765424	0.0135953462312516	0.00891178306375451	0.0171882239241524	0.0137910929210037	0.0384667983536625	0.0588109941836066	0.0604556692049825	0.0584155501578327	0.0531308881100274	0.0445966593027894	0.0972232338746807	0.101526385654398	0.0437692647021951	0.0401538275025402	0.0363925797643391	0.0317425440666145	0.0405670804075156	0.012553374728846	0.0158076449558971	0.0138165753666851	0.0115150097104305	0.0130715591001423	0.111808188268599	0.0767441242674839	0.0803739447970903	0.0810147346224694	0.015001096457001	0.0157134385047181	0.0207933832075554	0.00415749292722645	0.00959410309872644	0.0281699305597521	0.100985518287749	0.0922441453810899	0.0254884504603383	0.0851895783329806	0.0156278078772146	0.0967057947751992	0.100400344070888	0.133844200396491	0.0576676617969968	0.0465947218836813
SRF - T078 - 594411	0.0247362453375689	0.104324963178868	0.118319684633774	0.104880065299651	0.0499256602538174	0.134881086083248	0.124892090854997	0.0680439210097062	0.0633603578422091	0.071636798702607	0.0406574818574509	0.0159817764247921	0.113259568962061	0.114904243983437	0.112864124936287	0.00131768666842719	0.00985191547566516	0.151671808653135	0.155974960432853	0.0106793100762596	0.0946024022809948	0.0908411545427937	0.0227060307118401	0.0138814943709391	0.0670019495073006	0.0702562197343518	0.0682651501451397	0.0659635844888851	0.067520133878597	0.0573596134901446	0.131192699045938	0.134822519575545	0.135463309400924	0.0694496712354556	0.0701620132831727	0.07524195798601	0.0502910818512282	0.064042677877181	0.0262786442187025	0.155434093066204	0.146692720159545	0.0799370252387929	0.139638153111435	0.03882076690124	0.151154369553654	0.154848918849343	0.188292775174946	0.112116236575451	0.101043296662136
DCM - T098 - 599042	0.102237846183162	0.0268233623332752	0.0408180837881813	0.027378464454058	0.12742726109941	0.0573794852376549	0.0473904900094041	0.00945767983588675	0.0141412430033838	0.0058648021429859	0.036844118988142	0.0615198244208008	0.0357579681164683	0.0374026431378441	0.0353625240906944	0.0761839141771657	0.0676496853699278	0.0741702078075424	0.0784733595872601	0.0668222907693334	0.0171008014354018	0.0133395536972007	0.0547955701337528	0.0636201064746539	0.0104996513382923	0.00724538111124118	0.0092364507004532	0.0115380163567078	0.00998146696699598	0.134861214335738	0.0536910982003456	0.0573209187299519	0.0579617085553311	0.00805192961013734	0.00733958756242026	0.00225964285958291	0.0272105189943648	0.0134589229684119	0.0512229566268904	0.0779324922206107	0.0691911193139516	0.00243542439319999	0.0621365522658422	0.038680833944353	0.0736527687080609	0.0773473180037497	0.110791174329353	0.0346146357298585	0.023541695816543
DCM - T098 - 599079	0.0979722355791833	0.0310889729372538	0.0450836943921599	0.0316440750580366	0.123161650495432	0.0616450958416335	0.0516561006133827	0.00519206923190818	0.00987563239940525	0.00159919153900734	0.0325785083841635	0.0572542138168222	0.0400235787204468	0.0416682537418227	0.039628134694673	0.0719183035731872	0.0633840747659492	0.0784358184115209	0.0827389701912387	0.0625566801653548	0.0213664120393804	0.0176051643011793	0.0505299595297742	0.0593544958706753	0.00623404073431377	0.00297977050726261	0.00497084009647464	0.00727240575272925	0.00571585636301741	0.130595603731759	0.0579567088043241	0.0615865293339305	0.0622273191593097	0.00378631900615878	0.00307397695844169	0.00200596774439565	0.0229449083903862	0.00919331236443333	0.0469573460229119	0.0821981028245893	0.0734567299179302	0.00670103499717856	0.0664021628698208	0.0344152233403744	0.0779183793120395	0.0816129286077283	0.115056784933331	0.038880246333837	0.0278073064205215
MES - T098 - 599071	0.162630660251863	0.0335694517354261	0.01957473028052	0.0330143496146433	0.187820075168112	0.00301332883104644	0.0130023240592972	0.0698504939045881	0.0745340570720852	0.0662576162116872	0.0972369330568434	0.121912638489502	0.0246348459522331	0.0229901709308572	0.0250302899780069	0.136576728245867	0.128042499438629	0.013777393738841	0.0180805455185588	0.127215104838035	0.0432920126332995	0.0470532603715006	0.115188384202454	0.124012920543355	0.0708924654069937	0.0676381951799425	0.0696292647691545	0.0719308304254092	0.0703742810356973	0.195254028404439	0.00670171586835577	0.00307189533874941	0.00243110551337022	0.0684447436788387	0.0677324016311216	0.0626524569282843	0.0876033330630661	0.0738517370371132	0.111615770695592	0.0175396781519094	0.00879830524525027	0.0579573896755013	0.00174373819714091	0.0990736480130543	0.0132599546393596	0.0169545039350484	0.0503983602606516	0.0257781783388429	0.0368511182521584
MES - T098 - 599085	0.168283407490521	0.0392221989740843	0.0252274775191782	0.0386670968533015	0.19347282240677	0.0086660760697046	0.0186550712979554	0.0755032411432462	0.0801868043107433	0.0719103634503454	0.102889680295502	0.12756538572816	0.0302875931908912	0.0286429181695154	0.0306830372166651	0.142229475484525	0.133695246677287	0.00812464650018285	0.0124277982799006	0.132867852076693	0.0489447598719577	0.0527060076101588	0.120841131441112	0.129665667782013	0.0765452126456518	0.0732909424186007	0.0752820120078127	0.0775835776640673	0.0760270282743555	0.200906775643097	0.0123544631070139	0.00872464257740757	0.00808385275202839	0.0740974909174968	0.0733851488697798	0.0683052041669424	0.0932560803017243	0.0795044842757714	0.11726851793425	0.0118869309132512	0.00314555800659211	0.0636101369141595	0.00390900904151725	0.104726395251712	0.00760720740070142	0.0113017566963902	0.0447456130219934	0.031430925577501	0.0425038654908165
SRF - T098 - 599093	0.0852180240027687	0.0438431845136683	0.0578379059685744	0.0443982866344511	0.110407438919017	0.074399307418048	0.0644103121897972	0.00756214234450636	0.00287857917700929	0.0111550200374072	0.0198242968077489	0.0445000022404077	0.0527777902968614	0.0544224653182372	0.0523823462710875	0.0591640919967726	0.0506298631895347	0.0911900299879355	0.0954931817676532	0.0498024685889403	0.0341206236157949	0.0303593758775939	0.0377757479533597	0.0466002842942608	0.00652017084210077	0.00977444106915193	0.0077833714799399	0.00548180582368529	0.00703835521339713	0.117841392155344	0.0707109203807387	0.074340740910345	0.0749815307357242	0.00896789257025576	0.00968023461797285	0.0147601793208102	0.0101906968139717	0.00356089921198122	0.0342031344464973	0.0949523144010038	0.0862109414943447	0.0194552465735931	0.0791563744462354	0.0216610117639598	0.090672590888454	0.0943671401841428	0.127810996509746	0.0516344579102516	0.0405615179969361
SRF - T098 - 599120	0.0900373506560793	0.0390238578603578	0.0530185793152639	0.0395789599811406	0.115226765572328	0.0695799807647375	0.0595909855364867	0.00274281569119583	0.00194074747630124	0.00633569338409667	0.0246436234610595	0.0493193288937182	0.0479584636435508	0.0496031386649267	0.047563019617777	0.0639834186500832	0.0554491898428452	0.0863707033346249	0.0906738551143427	0.0546217952422508	0.0293012969624844	0.0255400492242833	0.0425950746066702	0.0514196109475713	0.00170084418879024	0.0049551144158414	0.00296404482662938	0.000662479170374763	0.0022190285600866	0.122660718808655	0.0658915937274281	0.0695214142570345	0.0701622040824137	0.00414856591694523	0.00486090796466232	0.00994085266749967	0.0150100234672822	0.00125842744132931	0.0390224610998078	0.0901329877476933	0.0813916148410342	0.0146359199202826	0.0743370477929248	0.0264803384172704	0.0858532642351435	0.0895478135308323	0.122991669856436	0.046815131256941	0.0357421913436256
DCM - T111 - 598961	0.102598018151909	0.0264631903645282	0.0404579118194343	0.027018292485311	0.127787433068157	0.0570193132689079	0.047030318040657	0.00981785180463379	0.0145014149721309	0.00622497411173295	0.0372042909568891	0.0618799963895478	0.0353977961477212	0.0370424711690971	0.0350023521219474	0.0765440861459128	0.0680098573386748	0.0738100358387953	0.078113187618513	0.0671824627380804	0.0167406294666548	0.0129793817284537	0.0551557421024998	0.0639802784434009	0.0108598233070394	0.00760555307998823	0.00959662266920025	0.0118981883254549	0.010341638935743	0.135221386304485	0.0533309262315985	0.0569607467612049	0.0576015365865841	0.00841210157888439	0.00769975953116731	0.00261981482832996	0.0275706909631118	0.0138190949371589	0.0515831285956375	0.0775723202518637	0.0688309473452046	0.00207525242445294	0.0617763802970952	0.0390410059131	0.0732925967393139	0.0769871460350027	0.110431002360606	0.0342544637611114	0.0231815238477959
MES - T111 - 599086	0.172107072072518	0.043045863556081	0.0290511421011749	0.0424907614352982	0.197296486988767	0.0124897406517013	0.0224787358799521	0.0793269057252429	0.08401046889274	0.0757340280323421	0.106713344877498	0.131389050310157	0.0341112577728879	0.032466582751512	0.0345067017986618	0.146053140066522	0.137518911259284	0.00430098191818618	0.00860413369790392	0.13669151665869	0.0527684244539544	0.0565296721921554	0.124664796023109	0.13348933236401	0.0803688772276485	0.0771146070005974	0.0791056765898094	0.081407242246064	0.0798506928563522	0.204730440225094	0.0161781276890106	0.0125483071594042	0.0119075173340251	0.0779211554994935	0.0772088134517764	0.0721288687489391	0.097079744883721	0.0833281488577681	0.121092182516247	0.00806326633125454	0.000678106575404569	0.0674338014961562	0.00773267362351393	0.108550059833709	0.00378354281870474	0.00747809211439354	0.0409219484399967	0.0352545901594977	0.0463275300728132
SRF - T111 - 599077	0.123396806996271	0.00566440152016578	0.0196591229750719	0.00621950364094859	0.14858622191252	0.0362205244245455	0.0262315291962947	0.0306166406489962	0.0353002038164932	0.0270237629560953	0.0580030798012515	0.0826787852339102	0.0145990073033588	0.0162436823247347	0.014203563277585	0.0973428749902752	0.0888086461830372	0.0530112469944329	0.0573143987741507	0.0879812515824428	0.00405815937770759	0.00781940711590867	0.0759545309468622	0.0847790672877633	0.0316586121514018	0.0284043419243506	0.0303954115135626	0.0326969771698172	0.0311404277801054	0.156020175148847	0.0325321373872361	0.0361619579168425	0.0368027477422217	0.0292108904232468	0.0284985483755297	0.0234186036726923	0.0483694798074742	0.0346178837815213	0.0723819174399998	0.0567735314075013	0.0480321585008422	0.0187235364199094	0.0409775914527328	0.0598397947574624	0.0524938078949515	0.0561883571906403	0.0896322135162435	0.013455674916749	0.00238273500343356
DCM - T112 - 598957	0.088467186164903	0.0405940223515341	0.0545887438064402	0.0411491244723169	0.113656601081151	0.0711501452559138	0.061161150027663	0.00431298018237214	0.000370582985124934	0.00790585787527298	0.0230734589698832	0.0477491644025419	0.0495286281347271	0.051173303156103	0.0491331841089533	0.0624132541589069	0.0538790253516689	0.0879408678258012	0.092244019605519	0.0530516307510745	0.0308714614536607	0.0271102137154596	0.0410249101154939	0.049849446456395	0.00327100867996655	0.00652527890701771	0.00453420931780568	0.00223264366155107	0.00378919305126291	0.121090554317479	0.0674617582186045	0.0710915787482108	0.07173236857359	0.00571873040812154	0.00643107245583863	0.011511017158676	0.0134398589761059	0.000311737049846994	0.0374522966086315	0.0917031522388696	0.0829617793322105	0.0162060844114589	0.0759072122841011	0.0249101739260941	0.0874234287263198	0.0911179780220086	0.124561834347612	0.0483852957481173	0.0373123558348019
MES - T112 - 599072	0.162145113524612	0.0330839050081753	0.0190891835532692	0.0325288028873925	0.187334528440861	0.00252778210379556	0.0125167773320464	0.0693649471773372	0.0740485103448343	0.0657720694844364	0.0967513863295925	0.121427091762251	0.0241492992249822	0.0225046242036063	0.0245447432507561	0.136091181518616	0.127556952711378	0.0142629404660919	0.0185660922458096	0.126729558110784	0.0428064659060486	0.0465677136442497	0.114702837475203	0.123527373816104	0.0704069186797428	0.0671526484526916	0.0691437180419037	0.0714452836981583	0.0698887343084464	0.194768481677188	0.0062161691411049	0.00258634861149853	0.00194555878611935	0.0679591969515878	0.0672468549038707	0.0621669102010334	0.0871177863358152	0.0733661903098624	0.111130223968341	0.0180252248791603	0.00928385197250114	0.0574718429482505	0.00222928492439178	0.0985881012858034	0.0137455013666105	0.0174400506622993	0.0508839069879025	0.025292631611592	0.0363655715249075
SRF - T112 - 598954	0.10882406506393	0.0202371434525074	0.0342318649074135	0.0207922455732902	0.134013479980178	0.0507932663568871	0.0408042711286363	0.0160438987166546	0.0207274618841516	0.0124510210237537	0.0434303378689099	0.0681060433015686	0.0291717492357004	0.0308164242570763	0.0287763052099266	0.0827701330579336	0.0742359042506956	0.0675839889267745	0.0718871407064923	0.0734085096501012	0.010514582554634	0.00675333481643292	0.0613817890145206	0.0702063253554217	0.0170858702190602	0.013831599992009	0.015822669581221	0.0181242352374756	0.0165676858477638	0.141447433216505	0.0471048793195777	0.0507346998491841	0.0513754896745633	0.0146381484909052	0.0139258064431881	0.00884586174035074	0.0337967378751326	0.0200451418491797	0.0578091755076582	0.0713462733398429	0.0626049004331838	0.00415079448756783	0.0555503333850744	0.0452670528251208	0.0670665498272931	0.0707610991229819	0.104204955448585	0.0280284168490906	0.0169554769357751
[truncated: 27 more columns]
