# Supplementary material for: Metagenomic Analyses Reveal the Influence of Depth Layers on Marine Biodiversity on Tropical and Subtropical Regions
Source: Microorganisms. 2023 Jun 27;11(7):1668. doi: 10.3390/microorganisms11071668 (PMC10386303; doi:10.3390/microorganisms11071668)
Supplement: Supplementary file 1 [file microorganisms-11-01668-s001.zip › SupTableS3.xlsx]

## Sheet: Supplementary Table S3
Supplementary Table S3. Number of reads attributed to a taxon in a given sample
	DCM - T064 - 594324	DCM - T064 - 598972	DCM - T064 - 599023	DCM - T064 - 599025	DCM - T064 - 594385	MES - T064 - 599021	MES - T064 - 599164	SRF - T064 - 598970	SRF - T064 - 599088	SRF - T064 - 599150	SRF - T064 - 594392	DCM - T065 - 594291	DCM - T065 - 598990	DCM - T065 - 599018	DCM - T065 - 599110	DCM - T065 - 594382	DCM - T065 - 594414	MES - T065 - 598960	MES - T065 - 599034	SRF - T065 - 594320	SRF - T065 - 598979	SRF - T065 - 599146	SRF - T065 - 594359	SRF - T065 - 594361	DCM - T068 - 599017	DCM - T068 - 599056	DCM - T068 - 599103	DCM - T068 - 594294	DCM - T068 - 594348	DCM - T068 - 594415	MES - T068 - 598947	MES - T068 - 599131	MES - T068 - 594302	SRF - T068 - 599129	SRF - T068 - 599171	SRF - T068 - 599174	SRF - T068 - 594318	SRF - T068 - 594297	SRF - T068 - 594391	DCM - T076 - 599040	DCM - T076 - 599148	DCM - T076 - 594321	DCM - T076 - 594298	DCM - T076 - 594355	MES - T076 - 599000	MES - T076 - 599154	MES - T076 - 594333	SRF - T076 - 599010	SRF - T076 - 599126
uncultured Mediterranean phage uvMED	417103	84871	13142	34290	12181	4087	143	35800	6260	70831	39721	129617	17571	3444	4173	10199	57575	21566	9162	3281809	32907	93756	93966	9105	22530	28983	35243	25587	85224	35647	25513	10287	10404	58064	37268	24467	45852	60379	18680	4188	6569	77611	8621	22828	11418	9243	32924	13864	4035
uncultured virus	104446	11804	1876	4710	5938	2124	80	5670	970	11092	19322	39916	2537	527	586	4180	23207	8677	3656	1027752	4798	13370	29933	2890	8908	10799	13387	7659	31440	19313	12804	5087	5054	23387	15037	9952	12400	19503	12747	959	1545	19771	2332	12556	8515	6960	23918	2802	830
Prokaryotic dsDNA virus sp.	103714	10592	1714	4224	4449	2816	85	3827	676	7720	12927	36630	3122	597	754	4356	24152	10785	4776	872258	4330	12052	36199	3560	5207	6716	8236	7862	25577	13952	16197	6564	7135	14456	9165	6262	10015	15680	7455	1307	1836	20283	2084	11662	8846	7718	32170	2475	703
Bacteroidetes bacterium	42786	41454	7128	16491	1721	12384	405	24654	4398	49836	7882	16126	23849	4488	5447	1430	8227	44742	19273	396235	19711	55936	11000	1029	25474	30347	37540	16700	272416	3839	62356	25479	34057	61803	39353	26852	38119	201944	2975	760	1187	20676	7573	4073	21584	18650	99285	3811	1088
uncultured Caudovirales phage	35038	13450	2110	5218	1598	2623	77	4835	908	9701	5164	17671	3469	640	811	1306	7954	9899	4276	452314	5528	15719	11203	1069	4975	6269	7775	5363	19138	4927	20190	8082	8092	13088	8244	5475	10927	13522	3021	631	916	14344	1680	3558	7791	6545	21916	1645	496
Prochlorococcus phage P-TIM68	31805	23015	3556	9136	1031	127	6	10802	1955	21177	4075	15822	1739	342	423	345	1915	1486	638	444993	6767	19575	2857	275	3651	4646	5919	3932	7077	753	285	104	120	9512	6305	4122	6599	8264	928	836	1274	14837	1326	1055	201	150	570	2938	842
uncultured Mediterranean phage	31670	9939	1593	4024	1543	7362	275	4344	814	8556	5799	14823	2579	494	601	966	5755	23080	9596	381885	4941	14432	7410	714	7607	9613	11856	12096	23039	5059	37255	14730	12614	19619	12558	8283	23684	17966	3856	609	968	23230	1755	3395	15896	13140	49452	1690	503
Flavobacteriales bacterium TMED228	18727	19306	3175	7678	695	1261	40	10210	1905	20912	3086	7849	12241	2232	2922	706	3752	4633	1926	199855	14770	42676	4754	483	13054	15781	19420	19939	91529	3328	10502	4091	4588	31189	19691	13407	38686	75777	2877	400	676	22490	2509	2013	3670	3019	10000	2037	602
Candidatus Pelagibacter sp. TMED64	16597	15069	2594	5909	821	30153	969	8890	1591	18240	2492	8682	8305	1599	1951	591	3204	96223	39599	218611	9589	27698	4653	442	12075	13980	17278	25822	85856	2553	130108	51017	37554	28414	17974	12342	64002	34943	1616	390	642	37953	3996	1458	35298	28628	128955	1444	403
Rhodospirillaceae bacterium TMED8	15035	9426	1821	3842	678	1965	77	2264	343	4838	3118	4566	3153	651	775	485	2880	7313	3347	114745	2485	6581	3587	348	3068	4037	4811	2527	31962	2544	10993	4672	4649	8211	5374	3943	4611	15818	1752	277	400	5363	1646	2235	3569	3213	13742	864	225
Gammaproteobacteria bacterium TMED36	13403	87887	13893	34298	524	8000	253	25175	4402	49356	1666	8006	50803	9590	11985	253	1616	30804	13326	195350	37342	103768	2630	245	24785	31647	38952	86050	248184	1536	56803	22315	28250	59411	38091	25487	78559	112688	1227	753	1190	97069	10370	757	10869	9135	44333	1131	351
Candidatus Pelagibacter sp. TMED203	13273	9037	1577	3498	602	2735	66	4548	827	9284	2380	6129	3584	703	819	422	2339	9010	3705	164560	5048	14676	3099	332	5438	6541	8103	11607	27656	2495	14246	5739	4921	13398	8422	5766	24419	13667	2046	366	534	21096	1484	1632	5261	4255	17409	1156	362
Prochlorococcus virus PGSP1	12623	1365	204	540	193	16	0	559	103	1117	822	1847	253	70	79	125	770	134	68	46830	266	706	1321	126	72	94	109	63	427	80	16	1	11	180	116	74	85	287	42	27	40	627	172	108	8	8	39	107	22
Virus NIOZ-UU157	11254	527	89	224	933	393	11	350	63	727	1734	4685	267	38	76	542	3149	1249	522	123617	369	985	4122	402	707	884	1071	415	3554	2503	3176	1253	1666	2156	1402	888	1033	2138	1083	60	81	1085	166	859	1770	1433	4513	93	30
Candidatus Bathyarchaeota archaeon	10771	1764	312	721	415	1818	84	658	128	1494	1461	4434	765	157	172	495	2656	5655	2491	112033	839	2245	3202	308	1016	1271	1533	1421	6540	1846	6312	2564	3090	2693	1774	1173	2858	3661	1119	91	119	3020	558	703	3247	2638	11673	188	47
Opitutae bacterium TMED67	9668	3930	809	1612	234	840	26	694	121	1617	1411	4285	1750	290	390	436	2155	3055	1491	97729	1236	3098	2475	246	6538	8647	10625	593	65121	1305	4677	2009	2667	17357	11146	7478	881	38477	787	100	145	402	828	306	1579	1476	7810	50	13
Candidatus Poseidoniales archaeon	9628	638875	111244	259875	14	16996	529	146929	24492	303755	62	7112	211198	42718	50768	21	123	63748	30702	124493	126005	330165	613	69	52121	70723	84554	198878	1372539	27	142954	60810	86336	94309	60345	41033	203398	632228	36	6753	9804	106513	57598	21	26305	24500	130777	10030	2726
Synechococcus phage SynMITS9220M01	9553	7499	1175	3017	244	58	5	2793	503	5599	1552	8798	1380	246	325	233	1420	862	325	235134	3632	10245	2069	211	1814	2475	2936	2439	3855	396	172	77	103	4848	3201	2148	3388	3797	535	263	359	6310	452	474	87	79	286	841	224
Cellvibrionales bacterium TMED49	9491	1395	256	557	495	281	8	590	97	1219	2495	2901	504	101	109	371	2221	1078	462	70979	632	1716	2436	243	587	821	968	926	3918	1915	1548	644	584	1579	1063	700	1285	2192	1324	101	119	1582	305	1751	617	550	2081	752	210
Synechococcus virus Bellamy	9255	8796	1390	3611	284	35	3	3189	582	6183	1716	19857	3172	664	730	658	3639	1756	773	554906	8017	22689	5675	554	2068	2605	3139	2864	4100	406	187	75	71	5340	3492	2260	3712	4227	562	248	370	6723	473	566	73	59	216	780	244
Pelagibacter phage HTVC027P	8985	521	63	182	362	173	8	209	36	415	2087	3024	161	21	27	389	2244	705	305	71086	250	766	2319	257	646	850	1127	830	3188	2609	1287	514	501	1916	1217	800	1218	1792	2229	65	120	1301	120	1654	852	674	2340	194	48
Synechococcus phage S-SM2	8663	7992	1268	3225	205	59	1	2954	507	5692	1382	13268	2221	409	537	353	2069	1292	515	367137	5547	16083	3371	365	1800	2134	2749	2335	3657	353	200	100	92	4764	3057	1900	3165	3673	428	214	364	6696	454	424	102	70	281	825	225
Candidatus Endolissoclinum sp. TMED37	8625	85056	14680	33491	432	2609	95	23301	3981	47794	1507	4432	35416	7072	8411	383	2047	8527	3750	117495	26966	72611	2919	292	8448	10637	13241	9331	78111	1181	17425	6952	6519	22623	14440	9734	18326	40139	844	1160	1647	18444	16510	964	4829	4096	14979	4056	1163
Prochlorococcus marinus	7899	456799	76364	180187	40	4642	163	470919	83723	953839	214	1577	35047	6617	8103	41	220	7568	3293	33432	54104	157099	432	41	452904	534799	659093	43082	4387508	72	6864	2873	12545	1015914	647878	442220	429814	2710461	52	7876	12504	162943	207633	91	4706	3880	16984	78035	23010
Candidatus Pelagibacter sp. TMED197	6983	12982	2115	5208	91	2167	79	8881	1662	18056	324	5005	8659	1690	2076	64	369	7527	3057	149924	11923	33842	779	66	8421	9748	12077	15456	52962	207	10663	4184	3441	19808	12535	8535	44488	22223	148	270	420	27542	2609	193	3042	2422	10800	2004	629
Pelagibacter phage HTVC023P	6981	430	58	160	174	82	3	190	24	351	1425	2757	121	24	19	281	1770	432	197	62152	237	624	2037	172	359	428	534	443	1509	863	486	169	170	876	548	359	540	805	966	46	79	1071	96	1026	326	274	960	169	42
Synechococcus virus SSKS1	6045	6450	991	2415	121	81	1	3067	566	5989	664	5365	1107	222	293	153	768	511	214	164615	3263	9436	843	91	1418	1778	2261	1266	3745	264	337	132	165	3620	2285	1522	2400	3486	262	169	268	4342	513	194	82	72	295	875	234
Flavobacteriaceae bacterium TMED48	5947	1129	192	453	118	106	5	564	103	1169	454	855	743	167	183	71	331	463	200	21481	524	1498	615	56	346	423	531	1164	4688	72	625	245	312	906	574	365	2312	2083	46	47	70	2653	398	65	154	117	539	189	54
Euryarchaeota archaeon TMED129	5934	8412	1296	3302	115	103	6	3024	515	6033	688	7330	2716	549	688	172	910	954	416	202565	4751	13131	1703	168	1356	1709	2112	2407	16983	130	463	168	271	2940	1867	1165	3629	6617	127	140	231	3534	297	178	161	112	430	413	129
Rhodobacteraceae bacterium TMED111	5829	43916	7396	17327	416	413	13	16877	2914	34492	1032	1920	34900	6740	8381	287	1565	1689	719	43970	20637	55682	1947	178	10153	13260	15924	5824	128810	1486	1476	682	725	28042	18024	12183	16524	58838	716	217	328	4871	3372	1015	544	470	1585	1418	369
Bathycoccus sp. RCC716 virus 3	5739	32360	5379	12868	0	67	1	7251	1240	14600	221	3318	3286	624	757	39	273	635	263	91058	7691	21225	252	27	382	462	561	748	1586	4	69	21	22	937	607	361	3575	1540	12	1	3	765	37	2	26	25	54	3	2
Prochlorococcus virus NATL1A7	5560	359	61	153	144	12	1	154	25	265	463	1548	89	19	19	156	848	113	44	37020	95	270	1302	116	50	74	101	57	269	57	32	9	11	131	112	63	68	187	31	12	34	520	107	159	13	15	36	56	14
uncultured gamma proteobacterium HF0070_03O15	5498	597	97	261	93	6	0	353	50	684	374	1179	193	45	45	79	524	105	37	26725	225	708	1050	99	95	109	124	686	857	51	16	14	13	212	135	80	723	504	29	43	60	656	80	207	11	14	33	95	25
Vibrio sp. HI00D65	5421	688	100	259	247	51	4	191	45	454	1478	1691	82	17	23	202	1238	297	107	40662	177	465	1479	138	203	306	321	284	842	913	273	103	111	609	386	244	339	549	749	62	77	845	76	1016	217	164	595	137	47
bacterium TMED88	5283	2745	528	1037	138	1108	23	616	89	1315	515	1318	1107	218	266	134	734	4095	2028	30945	645	1585	949	96	652	957	1114	791	4326	177	4480	2123	2295	1679	1185	806	950	3121	120	64	77	1272	349	126	2266	2242	9596	131	36
Euryarchaeota archaeon	5219	93132	17080	37524	175	65749	2030	24427	4017	50295	740	3289	34947	7016	8269	192	997	223029	105275	75848	21463	56990	1436	132	35625	47572	56747	172218	1029781	593	402048	167789	232247	60227	39260	27929	127065	437725	368	1708	2631	58313	30719	305	88278	81297	398267	1368	383
Rickettsiales bacterium TMED131	5108	6386	1119	2574	221	365	8	2175	388	4436	642	2407	2283	447	534	176	975	1355	589	68812	2395	7044	1334	132	1412	1845	2219	1888	10782	466	2369	948	956	4072	2617	1706	4684	5206	336	141	229	4659	1092	507	1083	863	2881	590	165
Pelagibacteraceae bacterium TMED287	5017	12340	2003	4870	244	5601	202	7291	1298	14719	728	2800	6820	1271	1512	128	763	18075	7598	77613	8208	23505	1032	97	6666	7805	9790	14984	43851	728	24323	9567	7163	15768	10324	6781	39106	18162	464	275	454	30465	2516	411	7066	5747	24792	1478	412
Candidatus Pelagibacter sp. TMED275	4972	9482	1609	3683	261	4598	134	6030	1090	12259	881	1873	4996	965	1143	153	957	14902	6040	50736	5532	15774	1218	102	6896	8127	10030	17987	51124	1031	28456	11145	6603	16646	10915	7310	46254	21378	851	199	279	21821	1853	635	5667	4564	18191	1140	332
Bathycoccus sp. RCC716 virus 2	4947	48240	8097	19082	0	76	2	8914	1528	17864	88	2232	5718	1104	1338	32	175	747	337	78241	11456	31961	172	19	129	136	197	291	531	2	24	16	15	317	236	135	1101	559	7	4	7	749	56	4	21	27	17	6	1
Actinomycetales bacterium	4900	1676	330	660	97	120	1	927	170	2019	447	774	1235	251	318	71	344	503	255	18432	837	2212	626	61	517	579	736	609	5584	38	625	264	291	1286	745	572	1582	2440	23	30	72	1264	410	58	174	150	1134	248	66
Pelagibacter phage Mosig EXVC030M	4837	1944	334	734	57	185	4	1397	281	2916	205	3165	1102	188	268	26	135	826	346	91995	2229	6493	324	37	1602	2081	2540	1091	6993	111	1580	579	493	3869	2399	1620	4471	4343	83	95	152	3432	542	131	488	420	1681	558	173
Euryarchaeota archaeon TMED248	4834	3842	606	1459	93	63	0	1878	363	3791	1196	1429	922	160	221	82	466	317	163	34337	968	2535	459	38	617	754	895	1051	11681	79	473	194	374	1323	814	537	3560	6451	186	33	42	585	108	281	41	56	254	125	31
bacterium TMED161	4724	11241	1885	4431	141	11388	355	8359	1501	17016	356	886	5256	1061	1256	94	542	35518	15000	20933	7778	22378	915	72	2067	2514	2935	9088	43137	206	47600	19372	32681	3707	2343	1613	15302	21216	76	334	584	19070	6775	247	14057	11359	73128	306	81
Prochlorococcus phage P-HM1	4617	15626	2292	6233	115	80	2	5954	1004	11371	432	1656	1837	368	461	34	184	280	131	55351	2471	7262	255	20	447	610	717	599	2049	47	19	7	15	1161	741	457	654	1851	43	255	429	4643	517	98	55	47	169	922	249
Betaproteobacteria bacterium TMED156	4551	2903	485	1157	275	594	21	1039	205	2104	871	2266	1069	212	261	200	1120	1934	769	61549	1199	3450	1391	123	803	984	1237	1414	4611	722	3847	1577	1394	2101	1412	857	2298	2672	536	103	156	3291	495	649	1395	1179	3804	350	103
Candidatus Pelagibacter sp. TMED166	4537	10006	1732	4082	355	4377	139	6704	1254	13647	889	3190	5349	1081	1282	135	895	13791	5767	90916	7276	20617	1323	129	5419	6355	7690	11801	39175	781	21433	8235	6842	12835	8079	5602	33398	16453	444	259	428	24855	2371	500	5680	4561	19417	1426	433
Synechococcus virus ST4	4479	4148	585	1647	104	72	2	1823	309	3360	526	2971	630	116	150	84	421	390	144	85132	1605	4552	565	55	797	1079	1284	816	2021	124	230	86	93	2137	1350	844	1392	1957	143	136	190	2853	282	154	115	83	302	492	176
Prochlorococcus phage P-HM2	4464	19402	2936	7637	115	114	5	7604	1347	15051	354	1611	2573	510	600	31	166	337	125	52844	3330	9476	207	19	985	1338	1741	1225	5966	61	88	33	37	2607	1707	1071	1298	4949	71	320	534	5510	684	81	75	69	262	918	287
Euryarchaeota archaeon TMED97	4454	2267	357	860	416	230	8	1175	191	2263	740	1446	1083	203	304	204	1147	880	412	38295	1089	3092	1455	134	1158	1379	1790	2511	12380	1528	1474	562	656	3097	1853	1312	3929	7679	675	59	83	1720	296	605	451	385	1595	203	70
Synechococcus phage S-SCSM1	4309	3980	619	1645	117	48	1	1615	252	3046	589	3384	680	130	189	110	525	453	181	101112	1818	5017	760	76	865	1113	1458	1150	2118	183	301	98	83	2283	1501	1023	1663	2044	218	107	162	2753	213	186	96	117	361	424	96
Prochlorococcus virus PSSP7	4241	517	73	192	79	6	1	218	32	394	307	738	98	12	21	65	407	51	24	18322	106	264	626	61	40	63	73	43	469	25	16	7	16	155	95	61	62	291	12	20	29	355	75	81	6	4	17	51	21
Rickettsiales bacterium TMED211	4103	2457	379	990	191	670	14	1274	218	2534	538	1876	1185	237	295	130	772	2308	933	46877	1502	4559	996	101	1923	2434	2962	3171	13011	768	3422	1372	1049	5155	3358	2185	7154	6320	475	112	192	5152	683	377	1619	1348	4414	521	134
Flavobacteriales bacterium TMED191	3870	7355	1191	2882	112	1058	33	5730	1016	11859	341	1055	2706	496	627	78	384	4014	1794	26483	4515	12888	627	51	3539	4185	5143	958	40185	217	6595	2568	4425	6549	4131	2869	2842	30399	122	307	505	1925	6101	206	2365	1972	8062	259	73
Alphaproteobacteria bacterium TMED194	3749	4858	763	1877	128	447	12	3190	542	6526	216	1657	3049	575	678	54	268	1605	718	62892	3507	10446	459	36	1874	2345	2891	2241	12215	211	2343	936	757	5014	3249	2097	6090	6151	129	218	276	7448	2279	173	1138	939	3072	1512	429
Flavobacteriales bacterium TMED123	3460	6624	1179	2662	142	5210	175	3231	572	6505	466	1750	3450	673	810	139	830	17446	7371	42550	3872	11016	1093	102	4112	5041	6398	1031	41541	594	38412	15576	17674	9476	6096	4128	3572	25640	383	173	259	2105	2581	303	13947	11570	38903	658	198
Prochlorococcus virus MED4-213	3455	12550	1902	4903	99	60	0	4859	796	9258	304	1216	1303	271	318	21	128	221	85	41613	1929	5596	180	15	308	412	540	389	1620	20	25	8	8	818	483	321	494	1350	33	244	402	3682	375	46	37	30	139	710	222
bacterium TMED198	3278	5251	837	2020	178	7089	226	2848	501	5593	500	2041	1744	339	398	80	537	22401	9501	57418	2638	7713	880	103	1967	2370	3039	6253	26766	448	30460	12279	20445	4252	2784	1846	13290	13441	246	189	316	12451	3403	222	8358	6797	40742	255	73
Verrucomicrobia bacterium TMED56	3216	5683	1095	2190	133	787	22	1550	258	3266	762	1334	3682	739	838	110	719	2751	1212	36147	2959	7974	901	69	1527	2013	2334	3272	12506	641	6029	2528	2712	3945	2511	1704	5378	8253	479	140	216	3953	722	522	1385	1196	5452	451	123
Pelagibacter phage HTVC008M	3196	1290	218	526	101	288	11	601	115	1201	313	1969	431	71	98	59	339	1164	439	49516	869	2476	566	61	1022	1333	1612	1246	2996	257	2515	992	771	2605	1676	1133	2995	2471	241	90	113	2587	222	193	978	857	2711	287	66
Candidatus Pelagibacter ubique	3043	630243	105763	247215	20	101624	3384	445576	80745	903889	80	6343	470930	89794	109982	35	195	333466	138501	152148	518862	1497825	356	35	287572	327771	405686	768419	2216170	109	585111	228953	143151	703915	449027	309620	2107869	870144	78	6064	9494	1073668	80062	67	113622	92556	378829	66943	19637
Verrucomicrobia bacterium TMED44	2846	3167	608	1186	161	609	21	747	126	1724	497	916	3439	677	840	142	793	2514	1100	22925	2318	6198	974	79	693	923	1050	624	9277	668	4811	1925	2271	1735	1130	848	1350	6021	383	84	119	1036	606	456	1019	889	4497	157	48
bacterium TMED277	2830	8730	1499	3388	62	1562	46	4590	814	9081	234	1850	4834	914	1102	67	444	5376	2192	47666	5366	15343	741	62	8959	10923	13310	8158	49176	232	8438	3405	2710	32593	20751	13807	22568	28252	178	198	320	10777	2183	142	2173	1747	7476	2191	672
Rhizobiales bacterium TMED227	2817	2197	386	871	115	352	9	1120	210	2254	501	1014	1127	210	306	110	664	1149	489	24211	1163	3352	785	78	729	883	1119	1608	6277	626	1417	575	503	1841	1149	771	3242	2743	480	51	68	3672	452	398	463	389	1699	279	75
Candidatus Marinimicrobia bacterium	2817	21759	3523	8442	122	208693	6505	8876	1579	18126	416	1339	16056	3111	3740	84	444	618922	268011	32897	12364	35058	661	73	8541	10438	12730	61996	200049	421	725568	295233	495975	17428	11313	7747	121584	105909	302	661	1026	70861	12288	274	234371	200263	1149908	662	212
Saprospirales bacterium TMED214	2805	4905	800	2034	73	468	9	1171	205	2406	442	2155	3334	697	883	87	389	2719	1346	56336	1828	4784	571	51	807	1013	1243	1089	4220	127	3044	1208	1406	2140	1355	952	1553	3182	172	110	196	2237	650	141	2351	2213	7066	263	70
Cyanophage P-RSM6	2794	4660	680	1885	83	70	6	1646	293	3313	313	1251	546	115	155	19	155	254	102	37240	828	2472	259	27	535	747	938	712	2053	81	247	132	103	1465	943	589	988	1681	73	105	214	1967	226	84	126	86	338	314	86
Gammaproteobacteria bacterium TMED104	2763	13484	2243	5299	193	414	14	7868	1423	15704	492	853	11215	2248	2675	119	687	1530	663	20550	9991	28353	954	100	802	1010	1250	3230	8369	619	1952	769	695	2076	1247	895	3291	4469	317	62	73	5327	463	393	457	378	1370	719	219
archaeon	2649	22159	5793	9490	3	1606	48	3726	594	9270	9	752	7256	1544	1708	0	12	5084	2395	26709	5589	13927	55	8	11162	14822	16979	1375	37081	6	5471	2328	1508	25596	17030	14606	2011	18044	3	741	1053	2275	1128	5	2933	2593	6320	4199	1100
Synechococcus virus STIP37	2602	578	100	228	70	8	0	164	32	323	187	646	110	11	26	77	398	54	25	15965	112	277	618	59	63	79	110	66	365	26	8	5	2	152	91	82	58	289	11	8	6	211	38	38	3	7	16	38	9
Proteobacteria bacterium	2524	43840	7659	17576	60	65827	2108	14694	2556	30356	291	1498	31395	6073	7265	124	747	225077	99255	31912	20447	57263	1250	110	13993	17375	21298	42738	161295	175	284579	115891	99282	31799	20729	14163	70545	103355	127	921	1405	43431	13293	190	81037	70091	230179	6063	1713
Prochlorococcus virus NATL2A133	2500	170	29	62	48	2	1	91	15	181	185	503	36	11	9	32	221	67	18	11676	57	166	355	34	23	22	47	35	134	39	44	11	25	59	43	35	39	73	24	2	8	171	23	39	5	6	35	35	11
Bacteroidetes bacterium 4572_77	2473	302	53	114	30	132	3	369	69	752	203	2130	137	20	25	29	236	635	261	60606	216	570	317	29	589	696	825	198	2275	168	740	291	372	1384	862	650	546	1427	99	18	10	318	133	65	273	182	940	74	15
uncultured marine virus	2449	396	56	145	74	131	4	137	13	255	315	809	113	24	15	104	680	521	194	20895	155	379	668	75	236	303	316	255	1189	490	1499	581	822	630	416	266	439	687	353	26	21	507	58	228	442	332	1179	67	21
Synechococcus virus SB28	2439	680	115	274	48	4	0	210	31	358	204	661	130	35	24	72	413	49	25	15478	107	279	592	70	95	118	157	108	507	24	12	7	4	264	192	105	64	450	19	11	16	211	45	51	7	3	11	12	5
Candidatus Pelagibacter sp. TMED202	2425	16115	2669	6454	67	2801	97	8759	1540	17687	223	1597	8592	1715	1980	47	259	9001	3728	44774	10180	29124	424	41	7515	8964	11098	19148	49266	181	12320	4903	3988	18414	11873	8049	45216	19877	155	362	525	34729	2589	138	3656	3118	13062	2172	570
Candidatus Pelagibacter sp. TMED239	2347	21511	3751	8414	62	5855	196	14535	2701	30252	192	1709	12835	2507	3046	44	212	20533	8285	47855	14145	41467	461	39	16985	19779	24483	41492	120655	234	40362	15848	8907	41958	26592	18022	110554	51873	184	313	506	48259	3903	62	7555	6107	23533	2186	636
uncultured cyanophage	2311	693	121	276	64	21	0	229	49	443	238	817	161	26	42	73	422	114	55	19718	175	436	652	70	109	150	139	134	515	50	180	64	62	293	208	133	190	368	26	7	23	467	50	69	76	60	177	31	11
Synechococcus virus SCAM9	2302	1498	241	543	38	20	1	614	121	1140	184	1116	189	41	49	22	136	124	47	31323	478	1438	215	24	275	330	421	294	554	41	81	44	27	657	488	287	456	566	52	57	99	887	91	58	36	33	108	226	71
uncultured Mediterranean phage MEDS1 group	2286	58	6	23	35	2	0	27	6	69	123	492	7	0	3	33	189	29	17	10156	16	68	368	34	21	32	29	14	51	103	0	0	0	40	30	17	21	45	31	19	17	87	6	65	3	5	5	28	11
Candidatus Endolissoclinum sp. TMED55	2278	14070	2400	5590	77	1645	47	4974	918	9980	412	1390	7006	1400	1711	56	308	5965	2622	37473	5338	14752	447	41	28632	36358	44301	10483	291799	472	10496	4163	4097	81517	52340	35846	24487	140752	446	389	509	11211	7675	162	2392	2025	9867	868	245
Planctomycetaceae bacterium TMED10	2240	1361	285	548	71	986	29	319	55	684	359	1235	1167	243	282	90	515	3968	1770	29621	594	1578	1101	106	436	590	679	414	12321	417	7708	3290	13997	1350	907	614	672	9426	321	58	109	1545	3449	213	1684	1518	13407	100	20
Flavobacteriales bacterium TMED113	2230	6927	1099	2716	62	558	21	3370	568	6625	239	811	1432	271	323	18	95	2010	834	25034	1643	5004	190	10	1107	1384	1645	865	11408	36	4319	1633	2594	2381	1495	968	1530	7964	34	160	248	2294	1274	43	818	734	3447	367	87
bacterium TMED264	2176	20851	3417	8298	80	8000	250	10197	1780	20508	183	1469	9545	1818	2286	54	263	26195	11288	34782	10021	28737	427	66	2761	3520	4343	16389	48133	171	33510	13599	17680	6283	3920	2634	23673	27323	122	908	1405	24165	6594	130	12637	10688	47085	1729	522
Hyphomonas sp. TMED31	2171	1818	298	799	53	99	2	680	135	1363	603	1749	331	51	76	39	274	280	123	49143	784	2271	447	57	482	630	779	595	1258	102	683	354	104	1301	813	540	756	978	178	85	117	1493	355	520	3833	3649	28380	224	67
Pelagibacter phage HTVC115P	2109	207	32	72	75	15	2	115	25	235	199	832	67	15	19	65	396	164	63	19663	185	478	564	68	166	213	243	179	884	193	174	70	67	392	253	166	279	436	115	22	31	400	45	131	52	60	158	75	26
Prochlorococcus virus PSSM7	2060	2106	337	830	48	33	1	810	147	1635	239	1098	337	64	69	20	149	177	75	31184	564	1647	244	24	1397	1797	2219	1964	5683	228	121	59	68	3880	2442	1594	2333	4372	240	73	127	1611	167	73	71	65	176	150	39
Prochlorococcus phage P-SSM3	2034	2385	368	978	79	16	2	941	180	1838	271	965	265	58	67	28	123	140	45	27329	547	1612	181	13	266	333	406	267	947	39	76	37	35	649	441	257	410	738	45	93	153	1287	153	75	60	58	147	254	75
Chloroflexi bacterium	1997	22102	3961	8650	60	48201	1495	9328	1673	19201	266	759	12218	2396	2859	53	331	138891	63613	17404	11883	33138	449	30	4652	5735	6824	20838	58219	178	192230	80514	116538	9137	6008	4236	34422	24648	164	672	1032	75027	16237	156	78942	71146	354691	821	226
bacterium TMED46	1969	86695	13894	33881	70	28014	873	31352	5627	63378	128	1392	37163	7236	8811	35	171	94707	41301	29626	35951	101721	318	25	21651	27020	33128	171744	451540	112	104788	42589	67417	43241	27356	18618	190710	240991	82	9374	14828	116202	39225	91	32285	27497	142438	2869	798
Cellvibrionales bacterium TMED79	1927	614	118	234	38	75	3	192	37	446	153	519	240	54	46	42	284	265	124	13025	231	632	400	38	105	130	175	192	1058	17	511	192	241	273	211	112	260	606	10	13	20	386	81	45	124	98	540	74	13
Verrucomicrobiaceae bacterium	1922	10550	1942	4265	112	4133	138	2790	490	5692	544	786	8692	1691	2034	53	327	14538	6971	16027	2784	7228	324	40	8555	11163	13467	908	94215	166	49285	20135	24865	21931	14473	9731	1224	40511	88	405	619	1342	5863	192	8478	7687	39434	193	49
Marine Group II euryarchaeote MED-G37	1914	264906	44108	106617	0	486	13	45894	7884	92914	0	1921	112208	22622	26973	1	8	3607	1670	21656	61673	161398	139	17	15391	21415	25589	47838	417376	0	1729	745	1561	30226	19737	12905	48349	231562	1	841	1191	21367	13112	0	290	267	707	325	95
Proteobacteria bacterium TMED261	1909	28694	4994	11676	43	11091	368	7276	1187	15353	152	2594	9393	1900	2271	54	333	35667	14807	66268	7690	20600	547	52	5974	7547	9222	9379	68250	100	49432	19687	15661	13986	8871	6093	22226	30985	117	322	444	11789	3627	65	13023	10553	49831	741	219
Flavobacteriales bacterium TMED235	1897	8545	1442	3350	66	2752	107	6004	1061	12260	157	647	5901	1137	1395	45	254	9144	3685	15389	5227	15146	423	43	5117	5631	7079	11674	42574	249	12798	4966	3451	12370	7774	5394	32649	16887	115	152	250	18900	2229	108	3093	2406	10675	1390	391
uncultured phage MedDCM-OCT-S08-C620	1859	57	4	16	93	0	1	25	11	53	140	394	6	1	2	44	200	19	7	8655	6	34	553	63	14	20	23	4	51	119	1	0	3	42	31	22	15	57	31	11	25	29	7	96	1	2	5	19	13
Rhodospirillaceae bacterium TMED256	1812	10806	2568	4638	82	841	30	1817	253	4381	191	1011	3758	812	933	93	495	3076	1503	26396	2621	6479	660	62	3041	4046	4484	823	40852	171	5396	2285	2815	7963	5303	3868	1725	22235	110	446	690	1991	3774	151	1414	1252	6604	717	162
Crocinitomicaceae bacterium TMED209	1755	4129	724	1631	27	273	10	1470	255	2872	188	1284	1052	212	265	33	206	971	420	34888	1279	3509	313	24	940	1135	1405	815	8285	43	1521	606	837	2191	1337	955	1478	5298	60	62	99	1454	513	48	431	355	1821	1208	340
Pedosvirus S28C3	1721	356	46	152	50	4	1	102	14	230	157	805	66	13	13	83	524	72	30	18312	69	184	836	90	49	83	94	79	350	34	22	7	10	192	131	76	61	352	13	5	6	187	28	56	3	7	15	18	9
Epulopiscium sp. SCG-B10WGA-EpuloB	1718	113	27	40	72	28	0	39	9	62	430	490	18	3	6	58	324	93	49	10852	34	108	391	34	53	65	81	95	239	296	99	36	47	171	98	61	122	155	237	20	12	161	28	314	84	85	286	35	12
Synechococcus virus SRIP1	1713	380	68	170	35	3	0	109	27	180	129	859	93	15	22	82	588	64	29	20679	99	219	903	83	78	104	129	146	352	23	28	13	5	166	100	75	95	242	11	6	4	155	40	28	0	3	6	12	5
Thermoplasmatales archaeon SG8-52-3	1700	128	17	57	82	160	5	52	8	128	352	517	55	8	10	57	369	436	176	13504	72	213	441	42	117	141	197	166	619	300	580	249	218	331	194	141	243	318	281	19	26	355	46	312	403	295	1297	32	11
Prochlorococcus virus PSSM2	1699	1859	266	753	33	21	0	776	148	1604	208	964	217	29	44	17	93	86	27	27829	560	1635	138	12	1641	1994	2564	1408	12285	94	56	16	35	4238	2650	1718	2299	6907	109	63	72	1355	131	52	24	10	54	236	66
Puniceispirillum phage HMO-2011	1669	118	20	60	118	10	1	49	10	114	356	501	31	8	7	84	517	86	40	13327	40	181	544	69	66	110	128	51	335	427	116	48	22	234	136	84	146	208	210	17	19	329	24	222	42	35	86	55	6
Circular genetic element sp.	1593	25	6	11	1	16	2	7	1	22	7	703	26	6	6	15	62	118	47	11560	9	22	115	16	50	66	85	59	389	4	400	167	124	110	36	40	34	147	12	13	21	38	10	20	104	82	154	27	6
Gammaproteobacteria bacterium	1588	134249	22160	53391	52	86616	2709	60151	10539	121897	498	1389	110411	21334	25981	60	244	291150	128630	22806	89575	250920	1297	143	81468	101024	123891	275427	1006192	117	421464	173135	167771	179130	114484	77683	350652	408436	504	1211	1770	127341	19332	238	122786	107477	456421	14793	4278
Synechococcus phage S-CBP1	1583	268	33	91	34	3	0	82	16	185	108	370	53	11	13	46	266	33	17	9705	50	119	376	41	33	51	66	76	195	13	11	2	6	100	56	44	47	141	8	8	6	140	23	38	7	4	16	6	3
SAR202 cluster bacterium	1583	39143	6527	15506	7	62913	1912	16763	2984	33939	21	385	19918	3815	4679	5	21	190389	87325	5371	19605	56189	47	6	6726	8334	10018	44322	107716	27	303434	126611	197321	12665	8124	5683	64534	44932	13	2446	3906	274868	46610	19	111919	102000	508205	792	215
Deltaproteobacteria bacterium	1572	21714	4839	8972	48	22051	683	5915	931	13099	218	703	10611	2266	2474	57	279	75134	35126	16749	6846	17808	403	55	5165	6674	7808	12979	65669	180	90002	38180	44383	11127	7307	5321	19815	39307	186	746	1086	15928	7510	155	32966	30633	145383	1432	352
Cyanophage P-RSM1	1557	2021	272	747	52	16	2	743	137	1487	197	739	246	68	75	24	115	97	49	20770	466	1305	157	11	181	239	318	196	727	30	76	34	32	460	311	219	347	592	31	71	82	891	109	40	26	16	111	200	54
Pelagibacteraceae bacterium TMED247	1534	21286	3630	8465	80	10693	343	12148	2337	25290	235	1147	10436	1945	2353	53	222	34344	14247	31203	11257	32592	305	28	6086	6954	8648	14248	43536	145	37740	14852	12080	14150	8870	6298	35414	16493	136	521	715	61400	5429	147	11474	9405	43815	2578	825
Spirochaetes bacterium	1518	1269	204	467	64	1074	34	502	100	952	216	910	636	125	154	65	382	3472	1543	22122	557	1545	459	34	517	596	707	920	3879	136	4343	1786	2088	1245	748	549	1884	2072	103	41	76	2159	408	107	1714	1484	6447	124	36
Epulopiscium sp. SCG-B11WGA-EpuloA1	1512	280	46	121	98	88	3	108	17	177	450	482	43	4	7	76	386	175	94	11849	69	242	407	41	134	170	207	152	431	343	165	64	49	336	225	130	221	275	262	21	27	299	30	275	109	107	248	99	20
Verrucomicrobia bacterium TMED175	1510	2567	423	1102	51	346	9	1111	192	2246	92	763	2425	453	550	25	148	1311	562	20625	2051	5788	181	23	796	984	1223	1474	6202	76	2595	1100	1064	2069	1348	882	3101	3953	54	73	86	3170	397	87	732	634	2683	282	88
Synechococcus phage S-CAM7	1495	1531	252	664	30	43	1	674	141	1409	191	928	245	47	56	24	139	163	67	28187	583	1696	177	24	332	412	519	325	1019	49	167	56	77	873	570	350	613	839	39	41	75	1132	108	51	73	57	220	172	60
Alteromonas sp. TMED35	1479	258	54	131	35	96	2	73	15	158	105	330	68	17	14	23	103	291	109	8504	88	231	193	16	464	684	764	255	964	31	346	199	63	228	166	109	190	411	17	18	21	237	65	31	174	141	2905	22	11
Synechococcus virus S-PRM1	1468	1106	179	485	28	21	2	429	71	886	162	1033	208	36	58	21	126	122	48	28312	494	1394	209	23	213	243	282	213	539	28	93	45	27	523	328	214	322	483	59	37	46	657	70	34	53	41	121	95	36
Synechococcus phage metaG-MbCM1	1448	1657	273	634	53	21	0	629	95	1176	208	582	190	32	46	24	89	74	31	16895	345	928	130	12	271	357	413	355	1235	38	62	19	22	719	479	274	547	1024	42	55	83	796	84	60	23	20	101	141	49
Myoviridae environmental samples	1444	1267	206	458	50	76	4	512	86	928	190	888	198	37	53	26	128	333	141	25345	452	1287	198	18	408	506	630	559	1075	87	512	217	209	970	619	407	841	943	74	41	75	1265	104	71	235	187	671	149	54
Synechococcus virus SCBP3	1433	304	46	108	27	3	0	96	12	196	134	336	45	12	15	45	205	24	7	8324	34	108	334	28	38	66	66	76	202	11	16	6	5	90	67	33	52	137	3	4	10	134	28	29	5	2	12	8	5
Roseobacter phage CRP-1	1423	154	29	49	88	13	1	50	9	106	255	548	35	9	8	79	502	95	41	13588	88	243	565	61	75	118	135	61	321	349	150	57	45	268	170	111	138	200	186	12	25	313	14	164	50	42	118	42	9
Rhodothermaceae bacterium TMED105	1396	259	52	91	52	54	1	82	13	184	222	421	62	18	13	65	323	198	88	9891	92	240	410	37	103	115	136	154	621	260	229	95	118	251	154	97	274	433	130	19	30	347	61	199	92	77	352	106	31
Gammaproteobacteria bacterium TMED78	1387	1283	202	503	66	670	26	574	99	1145	207	737	583	112	155	23	178	2503	1162	18227	658	1736	286	21	962	1139	1462	2202	6438	218	4028	1635	1574	2393	1534	1056	3264	3708	183	45	61	2419	419	103	1051	944	3422	128	37
Pekhitvirus S04C24	1381	485	75	226	34	2	1	146	26	288	138	1653	170	42	28	209	1196	135	38	39497	153	403	1895	191	31	48	63	70	171	24	8	4	3	75	55	37	48	136	7	2	5	171	41	20	3	3	5	6	6
Synechococcus phage S-SBP1	1330	443	76	176	35	4	0	121	18	201	139	526	78	27	17	75	411	49	15	12825	78	212	550	45	30	36	46	34	120	15	9	4	5	59	38	22	39	88	10	5	6	127	27	26	2	4	8	11	3
Candidatus Pelagibacter sp. TMED273	1311	17435	2827	7003	25	5871	185	11498	2070	23283	65	973	10354	1952	2442	34	205	19333	8087	23547	11983	34518	305	30	8062	9361	11417	21845	67142	59	29634	11689	9098	18632	11941	8257	55489	26342	39	245	391	36345	3546	49	6423	5285	23666	1896	567
Marine Group III euryarchaeote CG-Epi1	1310	23442	3797	9209	0	780	24	9746	1692	19450	1	295	7654	1521	1785	0	1	2876	1283	4542	6526	18652	10	1	4882	6027	7546	29562	123787	0	4470	1805	2969	8567	5525	3748	36277	47769	2	332	561	15986	8099	0	795	705	3806	795	249
Escherichia coli	1276	3006	654	1175	62	931	26	819	135	1762	212	555	1210	244	271	56	293	3321	1563	14826	881	2352	402	41	1084	1434	1739	1731	7699	162	4318	1924	1659	2627	1644	1298	2110	4198	148	65	109	1734	381	75	1664	1509	9611	322	92
Bathycoccus sp. RCC716 virus 1	1246	8279	1306	3285	0	17	1	2453	409	4988	42	749	1424	251	326	13	68	190	97	25253	3016	8779	77	4	152	156	174	388	618	1	32	11	14	381	253	172	1516	691	5	6	3	452	17	1	13	11	28	2	0
Alteromonadaceae bacterium TMED7	1231	1591	267	667	36	672	24	381	70	819	84	851	557	95	101	32	205	929	405	23038	783	2185	311	33	376	507	586	743	3516	139	907	1110	493	1011	606	466	879	2516	56	195	241	883	754	88	2918	2532	19986	329	95
Synechococcus phage S-WAM1	1230	2656	392	1049	28	37	2	893	171	1740	89	651	440	95	98	14	88	166	78	21407	555	1528	150	12	135	163	203	203	443	25	168	66	75	342	208	140	291	370	29	62	119	884	94	22	111	109	275	137	35
bacterium	1218	56976	9606	22319	31	65496	2036	26438	4661	53394	199	984	39658	7747	9311	129	734	217030	94805	17486	40336	115956	372	34	24569	29909	36726	209536	601001	83	263212	107198	179866	49074	31099	21331	384148	315048	83	1076	1772	100542	27744	156	67461	58059	320246	1490	447
Pelagibacteraceae bacterium TMED237	1187	27898	4658	11001	69	3758	128	20580	3690	41741	123	584	16705	3078	3838	50	209	13880	5559	12807	19167	56240	311	24	8424	9824	12109	16794	94827	116	14198	5686	6705	20622	13100	8874	58043	33413	67	373	540	48796	6587	96	3566	2959	13787	2424	719
Jalkavirus S08C159	1186	55	5	17	33	1	0	37	6	73	127	240	30	3	7	32	153	13	5	5304	29	87	289	24	12	15	17	13	49	82	0	0	0	38	26	12	7	32	26	11	13	33	4	70	0	0	5	19	7
Flavobacteriaceae bacterium TMED208	1153	1239	202	499	19	65	2	535	96	1187	93	202	1213	230	306	7	57	285	135	4894	897	2532	126	11	1392	1842	2108	4818	26390	8	526	206	277	3357	2055	1426	10040	13327	10	27	36	1613	299	10	104	80	406	96	26
uncultured phage MedDCM-OCT-S08-C151	1132	33	3	12	40	3	0	28	5	59	104	179	15	4	2	22	130	15	6	4646	33	61	238	22	14	25	23	4	61	80	3	1	1	49	22	16	15	23	33	15	11	30	4	49	4	2	5	22	5
Rickettsiales bacterium TMED127	1130	3575	611	1506	27	311	12	1125	196	2320	159	391	1287	273	292	15	102	802	306	12582	1397	3791	153	14	883	1129	1374	1499	7006	53	2200	852	775	2471	1611	1103	3172	3416	63	49	89	2236	744	60	515	471	1543	501	155
Actinobacteria bacterium	1121	7163	1411	2962	45	31370	888	2320	388	4831	192	401	4974	1052	1236	39	231	128005	68863	8856	2624	6869	339	55	2802	3561	4345	11324	39399	110	224634	106586	98318	5537	3500	2589	15901	18087	114	214	280	10455	2860	142	52232	53149	215865	464	117
archaeon SCG-AAA382B04	1115	103	11	47	39	99	1	40	9	77	179	384	32	6	6	38	257	351	170	10617	50	161	313	34	87	106	122	126	382	193	461	202	166	220	115	108	192	208	153	7	12	288	31	130	265	240	822	17	3
uncultured phage MedDCM-OCT-S08-C232	1095	36	4	21	17	1	0	25	4	46	65	254	0	0	2	16	119	30	10	5509	16	39	220	23	14	18	24	14	36	39	3	7	0	38	30	17	18	30	26	5	9	49	9	47	10	3	17	11	3
Euryarchaeota archaeon TMED164	1095	6455	1271	2659	72	468	10	1842	312	3990	193	359	1938	406	455	54	313	1934	829	9174	1547	4243	350	37	1694	2273	2797	11967	33637	275	3468	1429	2028	3756	2310	1585	11019	14839	153	117	147	3630	986	124	515	440	1795	157	43
Roseivirga thermotolerans	1084	341	50	128	1	246	9	116	23	227	8	23	170	36	41	1	3	511	207	370	124	356	9	4	76	94	102	226	839	2	540	192	287	178	114	64	527	579	9	5	5	258	84	3	254	209	3736	26	5
Verrucomicrobia bacterium	1075	23250	5691	9489	35	42044	1122	4473	724	10227	153	533	13171	2759	3066	26	139	129308	64735	11314	6680	16018	280	27	6613	8601	10233	3317	87799	80	181894	81602	104007	16242	10632	7757	5814	48493	75	790	1046	5094	7529	77	74678	72833	399621	520	140
Planctomycetes bacterium	1073	13768	3204	5748	35	21751	643	3050	527	6842	205	607	8290	1780	2068	91	620	71286	34669	12984	4661	11663	403	33	2861	3779	4268	4347	39402	128	99633	43492	61935	6862	4418	3311	6806	24185	87	664	927	7162	7718	224	32964	31351	176238	645	190
Flavobacteriaceae bacterium TMED212	1072	2528	459	982	37	179	5	1624	285	3233	138	552	1073	235	261	8	58	568	278	14628	1002	2812	108	12	838	1053	1260	1772	6818	44	968	397	302	2101	1317	917	3972	3794	56	43	97	2640	427	35	209	166	779	522	151
Candidatus Pelagibacter sp. TMED165	1071	8942	1496	3576	13	2959	99	5720	1054	11866	66	585	6050	1128	1408	10	68	9447	3921	16701	6775	19689	102	10	5208	5840	7317	11895	36801	53	12464	4967	3614	12282	7737	5266	32044	13927	36	153	251	20145	1745	61	3299	2646	12124	1144	315
uncultured Mediterranean phage uvDeep-CGR2-AD8-C175	1070	52	6	12	22	33	2	22	1	51	82	237	13	2	2	28	114	109	47	6217	29	74	221	24	123	102	147	84	390	159	198	102	73	212	142	103	165	207	84	18	28	138	24	77	101	101	309	37	14
bacterium TMED15	1069	18438	3066	7215	38	4456	139	2980	509	6158	122	532	5852	1151	1352	38	204	16556	7647	9804	2954	7920	242	32	1970	2400	2993	715	10447	141	24341	10105	6324	4943	3204	2161	1313	4803	99	1423	2163	3028	9556	39	8916	7781	15987	202	69
Roseobacter phage CRP-2	1060	106	15	40	56	7	0	38	7	80	161	320	33	11	13	70	383	65	21	9169	52	161	398	39	66	78	110	45	281	259	104	43	28	220	114	70	112	223	153	12	24	256	13	157	31	39	99	55	16
Acidobacteria bacterium	1059	13237	2737	5279	26	46047	1382	3984	687	8535	142	488	7104	1494	1724	32	151	149452	71781	11967	4820	13127	260	36	3449	4313	5107	8848	40481	70	175880	76612	82639	7780	5018	3859	14310	21709	83	454	583	14702	6016	102	81679	76565	349840	950	274
Candidatus Pelagibacter sp. TMED142	1059	5566	1008	2212	76	2294	73	2815	495	5603	285	591	2611	503	643	52	300	7073	2953	18194	2854	7808	331	39	1803	2240	2700	4734	13390	240	10121	3919	2681	4409	2971	2045	10784	6087	156	121	203	9944	970	175	2706	2312	9692	918	251
Thermus thermophilus	1051	311	47	102	19	22	1	116	14	210	76	511	59	12	14	45	244	127	45	10999	51	146	421	47	22	36	29	41	136	4	94	48	52	46	33	30	52	89	5	3	6	124	41	18	49	40	208	12	3
Prochlorococcus virus PSSP10	1047	75	10	36	30	4	0	40	10	85	88	208	16	5	3	14	77	20	7	5254	25	56	161	17	9	13	20	9	73	15	7	3	0	46	24	15	14	40	8	5	5	57	8	21	3	4	8	6	3
Alphaproteobacteria bacterium TMED62	1041	4092	660	1597	34	427	9	2901	511	5904	98	406	2926	564	680	22	122	1425	619	10264	2909	8553	144	15	2360	2692	3521	2114	24096	41	1592	651	603	6796	4317	3083	8465	8663	42	69	147	3877	2553	46	586	487	1955	1235	395
Cyanophage MED4-117	1039	12	7	7	30	0	0	18	6	25	61	240	0	0	1	16	105	14	10	5507	7	22	237	30	9	8	11	2	13	21	0	0	0	20	11	8	5	15	9	6	11	7	6	43	0	1	0	13	3
Bathycoccus sp. RCC1105 virus BpV	1029	10944	1760	4340	3	26	3	2321	408	4625	43	852	1899	360	440	26	93	259	106	29088	3896	11086	74	9	1320	1662	2009	5548	7124	3	204	69	73	3716	2335	1603	19042	8474	25	3	4	377	22	2	38	39	122	3	2
Crocinitomicaceae bacterium TMED45	1029	5298	1083	2159	31	620	24	1436	234	3013	150	850	1650	354	391	34	180	2024	926	22496	1688	4273	314	31	1051	1421	1718	1277	9618	130	3950	1659	2126	2288	1509	985	1889	6395	85	83	129	1910	417	64	1108	936	4185	2306	569
Candidatus Thorarchaeota archaeon	1025	616	117	232	48	492	11	221	46	453	169	464	256	51	56	48	189	1500	677	11243	254	660	219	23	194	281	319	442	1669	126	1758	751	884	492	326	255	707	928	68	19	31	641	154	65	689	597	2609	70	17
Pelagibacter phage HTVC103P	1009	87	13	38	29	18	2	78	10	127	94	475	24	10	8	38	221	125	52	10871	118	330	285	27	42	69	83	44	216	72	132	44	62	123	85	53	89	103	36	6	14	126	17	54	63	44	207	21	8
Prochlorococcus virus PSSP3	1005	89	19	42	18	2	0	46	5	95	66	134	13	6	1	10	46	13	4	3394	17	44	88	7	11	13	10	8	58	8	1	1	2	26	12	13	12	37	4	7	7	113	32	8	1	3	4	15	5
Synechococcus phage S-EIVl	1003	101	18	38	62	3	0	44	4	83	374	285	10	2	2	18	122	30	2	6855	28	76	125	10	22	22	22	9	36	38	6	4	2	52	32	27	27	41	44	4	18	146	6	104	2	2	15	25	8
Rhodobacteraceae bacterium TMED38	1001	7409	1288	2978	55	117	2	3147	530	6163	207	361	4989	1042	1181	36	287	375	179	8913	2819	7791	380	35	1379	1861	2259	557	15594	173	454	190	177	4621	2781	1892	1267	6877	104	47	71	1575	534	131	158	130	444	612	186
Alphaproteobacteria bacterium TMED93	993	4775	800	1881	29	433	10	3357	601	6916	50	606	3769	769	894	12	43	1498	630	18130	3988	11472	95	8	2359	2690	3326	1983	21392	50	1932	753	677	6223	3911	2709	8026	7810	24	73	122	3650	2107	42	664	521	2222	877	235
Podivirus S05C243	985	99	16	48	8	1	0	35	6	66	42	102	12	5	2	5	36	6	4	2809	15	39	70	4	6	10	23	12	104	3	0	0	1	28	23	18	13	59	1	3	5	29	9	3	0	0	0	3	3
Pelagibacter phage HTVC104P	982	99	6	36	19	29	0	68	14	139	115	549	41	8	14	34	216	146	75	11659	124	426	320	32	72	86	110	68	309	73	178	73	72	149	106	74	146	155	38	4	9	174	9	41	60	49	197	21	4
Methylococcaceae bacterium TMED282	948	1666	272	689	38	600	19	448	71	926	160	313	721	148	158	27	167	2029	936	6965	529	1551	218	23	722	1037	1158	1434	11598	314	3445	1423	1380	1890	1257	867	2315	5920	154	30	33	1243	506	85	860	766	3308	47	13
uncultured Mediterranean phage uvDeep-CGR2-KM22-C255	946	37	4	20	40	189	3	25	2	46	87	284	22	5	4	31	195	638	281	6987	24	75	302	23	35	55	56	33	205	77	891	354	419	76	62	25	72	115	41	9	14	201	27	79	534	426	1638	37	10
uncultured bacterium	945	20018	3477	8127	15	5592	167	9288	1697	19559	171	554	10751	2077	2556	50	207	18617	8226	13021	8379	23299	363	41	6626	8336	10061	13811	70320	86	27022	11015	12022	17057	11079	7446	21561	42840	154	217	347	14555	3070	101	8826	7659	41968	2641	788
Ashivirus S45C4	939	208	27	74	23	3	1	72	14	132	80	327	41	8	11	42	186	25	15	7872	52	148	302	27	24	34	52	47	184	16	10	3	4	102	75	44	36	155	7	3	5	134	8	12	4	5	11	18	4
Pelagibacteraceae bacterium TMED201	927	26617	4491	10480	29	7571	234	19281	3395	39093	54	664	16603	3313	3851	13	69	25134	10509	17635	19121	54815	160	14	18883	21716	26374	46115	138983	59	45631	17784	10702	46169	29272	20107	131395	55069	39	326	525	55468	4682	38	8474	6963	28424	2667	808
uncultured phage MedDCM-OCT-S05-C139	903	59	10	15	15	1	0	36	7	58	46	107	14	4	1	6	43	8	8	2845	24	50	72	6	8	3	10	6	51	11	13	6	5	26	12	3	5	33	9	1	2	41	12	9	6	6	16	7	1
Alphaproteobacteria bacterium	891	49124	8579	19465	27	184961	6008	26375	4713	53966	267	525	31068	5986	7347	28	137	558166	232505	11805	27178	76878	287	22	23007	27130	33468	40211	216500	75	582701	233409	192402	56403	36117	24814	100926	89071	131	842	1351	69632	17543	178	220306	180237	865257	12719	3776
Proteobacteria bacterium TMED154	873	65403	11842	26603	7	4543	135	12301	2083	25748	44	526	31800	6374	7595	6	49	19249	8589	14727	15930	40607	92	14	3898	5187	6271	6486	52883	15	16325	6677	5549	8851	5709	4006	5840	34512	8	734	1169	15327	10280	25	3887	3454	11135	3593	991
Synechococcus virus SCBP4	852	262	41	116	32	3	0	79	8	128	76	266	62	20	14	24	158	23	13	6079	42	129	240	26	40	31	59	80	139	10	5	2	2	78	49	30	45	106	4	3	7	87	21	19	2	2	6	6	1
Gammaproteobacteria virus GOV_bin_2604	849	134	23	50	70	18	1	43	13	91	164	344	49	10	16	42	240	78	34	8450	63	239	323	30	56	53	88	58	226	219	96	37	34	128	75	66	86	196	84	12	22	162	17	138	56	50	160	26	3
Myoviridae sp.	847	627	113	260	21	151	1	236	42	485	85	444	123	27	34	18	119	537	230	12176	277	763	152	18	176	217	270	202	560	52	983	364	382	419	281	181	511	436	56	31	34	670	52	40	447	332	1304	81	24
Candidatus Pelagibacter sp.	841	22473	3814	8937	34	55925	1836	15644	2807	32283	111	433	14399	2786	3329	38	191	177428	73214	10502	15441	44621	220	15	17039	19365	23920	43715	139165	109	266378	104974	61526	40175	25321	17552	119688	50982	107	280	423	59771	5554	84	65951	54001	219358	1567	485
Dehalococcoidia bacterium	791	2180	397	934	28	11911	352	674	120	1410	126	332	1048	166	256	17	145	30567	14616	9165	908	2494	187	17	567	665	812	2046	7243	127	31807	13887	19488	1141	711	537	2782	3104	81	118	188	10292	3534	72	28812	26880	135490	108	27
Rickettsiales bacterium TMED254	782	1706	317	684	20	333	8	917	160	1887	71	393	921	190	201	12	64	1082	439	10820	979	2922	181	20	888	1039	1240	1010	7451	31	1586	661	465	2296	1507	966	3619	3100	36	58	84	2430	587	39	462	367	1503	369	112
Muricauda sp. TMED12	780	654	92	240	27	164	3	230	37	428	98	379	223	40	61	23	152	553	251	10314	258	727	279	33	182	227	287	436	785	51	909	354	345	460	336	213	540	580	35	20	39	747	184	61	745	616	7281	127	24
Pelagibacter phage HTVC034P	779	30	4	16	35	3	0	23	5	43	139	206	11	2	1	23	160	40	15	5153	19	47	247	25	43	53	53	46	180	130	39	12	18	104	51	39	79	101	59	9	22	130	19	169	15	6	44	36	7
Powvirus S08C41	748	173	39	78	15	0	0	76	8	144	58	164	40	5	6	17	101	9	1	3805	28	100	145	19	35	37	56	39	217	8	3	1	0	97	48	35	30	194	3	3	4	68	16	10	0	0	1	8	1
Micromonas sp. RCC1109 virus MpV1	743	11854	1948	4911	2	15	2	2768	472	5623	70	2932	2753	552	647	51	291	340	136	78822	7195	19925	195	19	112	197	222	89	312	4	75	32	27	307	207	129	655	346	2	0	3	299	5	0	18	14	26	0	0
Synechococcus phage S-CBM2	734	827	137	339	24	45	1	317	49	617	101	427	162	37	35	14	74	156	68	12467	283	771	129	9	175	224	273	202	526	32	281	111	83	408	262	213	398	424	24	29	39	584	39	30	124	103	332	63	18
Pagavirus S05C849	724	169	34	58	10	1	0	66	12	90	55	115	25	1	5	11	72	7	4	3125	29	69	122	21	18	12	17	9	122	4	0	2	1	33	16	20	15	78	4	0	2	44	10	15	0	2	1	2	1
Prochlorococcus phage P-RSP2	716	94	12	34	15	13	0	39	13	83	79	223	14	1	1	18	109	36	16	5379	33	93	174	14	18	9	14	11	58	22	67	15	27	39	26	16	17	31	5	7	12	96	15	39	17	19	58	20	9
Betaproteobacteria bacterium TMED22	715	1044	165	408	14	205	4	374	78	836	44	407	300	63	65	8	56	630	279	11201	346	1084	67	7	255	297	385	388	1693	16	929	367	373	681	433	273	630	946	12	33	64	705	193	17	254	228	1055	166	50
Bacteriophage sp.	711	377	60	123	42	21	0	126	24	264	90	351	98	18	25	28	161	126	58	9834	191	495	224	19	76	136	170	131	393	64	202	76	85	239	150	99	247	276	55	9	11	328	32	53	77	60	215	37	15
Synechococcus phage S-H38	710	881	145	372	21	43	0	350	61	690	104	590	207	26	47	17	96	209	77	18277	384	1178	140	13	141	190	201	183	476	26	258	109	112	367	262	153	344	379	33	14	46	616	53	38	124	97	322	83	23
Rhodospirillaceae bacterium TMED167	699	13786	2877	5458	22	1905	62	2702	454	6320	91	837	6250	1322	1653	26	180	6920	3087	21758	4285	10369	254	25	924	1251	1417	610	11646	55	8574	3581	4205	2426	1624	1144	1286	5833	48	160	228	1178	1352	45	2777	2452	12632	838	207
Synechococcus phage S-SSM5	698	664	114	270	29	11	0	285	48	555	92	560	147	24	32	22	84	82	27	15265	279	793	117	14	115	157	189	152	326	29	56	18	15	290	198	119	228	300	15	25	55	421	45	33	36	21	63	66	14
bacterium B17	673	77	19	37	9	39	0	137	28	316	23	876	32	11	10	4	29	206	99	25258	57	194	87	7	254	265	327	48	687	34	250	90	140	597	369	250	106	436	16	5	6	121	47	16	144	93	446	22	4
Prochlorococcus virus SS120-1	671	104	13	39	9	6	1	37	6	64	60	181	20	5	3	16	76	23	8	4756	26	78	126	12	24	51	47	31	153	16	38	18	18	79	50	30	42	100	8	3	9	66	13	22	14	13	32	11	3
Micromonas pusilla virus 12T	668	9328	1580	3807	2	25	0	2660	474	5316	62	3726	2766	542	708	62	249	380	171	101682	7414	20199	182	15	87	145	136	55	293	1	71	39	38	225	144	98	410	272	3	2	0	274	13	2	22	20	44	5	2
Alteromonas macleodii	666	3953	667	1622	1	9143	289	188	34	394	13	97	1041	186	259	3	5	23410	10335	2493	73	197	35	1	6231	8439	10330	13634	23160	1	31220	14278	1123	6920	4410	2973	7079	23413	0	391	596	3389	9902	1	13354	11387	682881	236	79
Prochlorococcus sp. MIT 0604	650	20034	3297	7928	4	220	11	21973	3980	44189	42	105	1477	238	315	2	27	335	135	2546	2406	6977	57	8	1691	2061	2370	319	17990	2	189	93	114	3935	2673	1777	2606	11773	7	201	333	6953	5901	17	228	172	742	3762	1186
SAR86 cluster bacterium	633	103927	17134	41235	6	8289	259	69091	12393	138697	96	814	66264	12522	15733	15	82	32475	14210	9867	65112	185361	171	19	67272	80000	99013	277212	731935	17	61812	24973	28399	160583	102537	69663	350137	376397	31	734	1146	84219	11113	112	12299	10984	50469	14589	4411
Methylococcaceae bacterium TMED69	624	4529	746	1758	52	951	27	1260	197	2510	183	465	1788	361	393	34	195	2910	1236	14085	1466	4011	313	31	679	901	1088	1925	6432	64	4518	1911	1608	1741	1119	778	2954	3508	77	127	161	5751	925	110	1497	1220	4789	438	140
Synechococcus phage S-B68	619	361	61	139	19	17	0	126	25	270	94	391	83	16	17	16	80	98	33	10045	157	397	110	9	163	230	294	164	506	58	136	60	41	399	269	179	319	374	39	12	21	288	21	16	63	42	172	39	14
Betaproteobacteria bacterium TMED41	616	4566	716	1753	14	348	13	880	138	1825	162	585	952	157	220	34	183	1085	489	20523	1010	2901	215	20	1189	1505	1833	3493	6524	104	3285	1281	1237	3236	2067	1293	4657	4485	123	87	145	3005	294	65	741	634	2212	294	73
Candidatus Puniceispirillum sp. TMED52	615	2395	402	938	26	391	7	958	164	2006	45	263	1170	234	267	27	134	1220	559	6837	897	2516	203	19	965	1077	1372	803	8055	68	1804	754	637	3037	1943	1329	2064	4703	31	25	45	1241	429	49	494	441	1871	571	183
Crenarchaeota archaeon	612	459	66	182	13	567	11	196	27	378	39	283	100	19	25	2	38	2029	842	8498	172	437	44	3	151	188	222	432	900	26	2223	919	464	384	258	166	772	407	20	20	18	1024	46	21	856	718	1786	55	18
Gammaproteobacteria bacterium TMED95	606	2259	414	940	42	343	14	565	85	1174	97	222	1018	205	239	30	187	1404	634	5293	705	1832	177	20	256	338	422	529	3231	119	3535	1483	1333	638	392	264	691	1646	64	50	59	742	352	87	513	437	2139	162	43
Flavobacteriaceae bacterium TMED42	595	1151	197	426	26	130	1	632	110	1361	59	394	1094	220	255	10	80	657	299	10520	694	2127	141	15	469	611	716	1626	5435	51	977	417	501	1037	693	460	3325	2578	36	19	41	2268	249	32	279	232	991	88	26
Pelagibacteraceae bacterium TMED65	595	6752	1132	2586	13	1426	42	4036	744	8095	54	421	4747	906	1076	24	77	4665	1896	10071	5194	14724	440	37	3565	4127	4900	3130	34113	25	5823	2314	1908	9584	6040	4262	13427	15180	16	132	200	5881	2892	16	1681	1417	5927	1719	516
Flavobacteriales bacterium	585	35208	5935	13734	6	8016	246	21177	3795	42051	43	595	29312	5601	6878	6	47	37957	15755	12091	25314	74185	101	11	19838	22580	27952	34171	237376	19	92916	35866	49935	47849	30263	20960	90447	142566	35	320	474	30182	7273	28	12326	10277	45448	4479	1406
Synechococcus virus SSM1	580	655	106	254	19	25	2	225	42	469	70	562	161	28	39	21	86	83	49	16834	298	789	125	13	91	118	137	80	304	16	80	39	35	240	142	89	174	259	14	27	50	366	43	26	58	45	118	40	11
Cyanophage S-SSM6a	575	657	105	254	10	8	0	260	53	507	45	236	108	17	19	10	28	29	14	6152	150	398	30	0	54	54	82	83	250	6	11	2	3	164	103	65	91	174	12	20	31	445	38	27	6	5	24	68	29
Puniceicoccaceae bacterium TMED149	574	1859	318	745	53	239	10	1164	195	2196	133	303	1297	248	300	25	164	884	350	7784	1535	4330	252	19	489	565	672	960	3203	100	1390	558	462	1185	714	527	2721	1382	54	35	55	3009	268	112	552	466	1721	257	67
Flammeovirgaceae bacterium TMED32	574	1871	318	756	17	255	6	813	136	1573	46	308	1019	218	231	10	111	966	425	7649	911	2632	133	12	1142	1427	1808	2192	10377	51	1453	561	791	3054	1930	1293	3200	6207	34	35	62	1578	446	31	395	361	1555	129	32
bacterium TMED181	573	2593	713	1098	14	231	4	500	68	1332	25	382	885	170	193	14	63	770	377	9396	625	1546	309	26	1395	1762	1934	373	9475	23	1272	535	693	2592	1770	1516	426	4453	8	25	45	384	82	14	374	333	1582	57	20
Rhodobacteraceae bacterium SB2	567	2129	382	895	47	376	4	828	148	1691	149	174	1266	275	303	38	213	1289	558	4522	801	2203	219	19	802	1003	1227	717	9446	226	2098	843	717	2361	1434	1069	1650	4398	115	29	65	1124	371	103	526	437	1920	609	163
Synechococcus sp. TMED187	566	1916	698	870	14	129	5	329	45	896	27	413	756	148	187	17	79	478	234	10156	629	1355	370	38	812	884	999	148	3393	28	1036	419	493	1402	982	1031	251	1551	16	97	131	351	121	20	352	307	1345	215	45
uncultured delta proteobacterium	558	336	64	153	14	151	5	193	37	387	29	401	163	44	39	9	54	525	230	10310	276	793	106	8	568	746	843	673	1417	67	1657	661	348	1482	971	676	2068	1374	43	27	30	886	96	26	362	308	1105	97	22
Thermoplasmata archaeon	549	707	121	274	14	656	23	312	51	612	74	260	325	67	78	18	95	2031	900	6034	285	913	127	11	223	339	392	543	2518	47	2440	1052	1239	562	387	249	984	1220	40	23	35	937	270	43	961	830	3851	63	24
Synechococcus virus SCAM1	548	905	148	333	23	23	0	372	63	704	77	508	1176	241	240	13	62	129	65	15855	968	2731	111	16	126	169	238	180	516	29	137	46	38	337	232	128	239	399	23	16	37	432	46	27	54	48	154	44	15
Bacteroidetes bacterium SCGC AAA795-G10	545	3199	542	1271	26	257	5	1417	254	2899	137	179	3029	576	685	15	79	889	406	4746	1535	4320	113	9	521	594	715	1899	7040	104	1070	430	537	1212	756	513	3965	3306	71	36	63	3850	721	85	354	261	1208	512	160
Nitrosomonadales bacterium	544	140	34	68	37	195	6	57	11	102	88	289	76	14	27	41	147	540	258	7376	55	200	182	17	85	106	162	209	701	83	1023	401	421	245	156	121	315	329	49	2	8	189	38	28	241	198	986	16	3
Synechococcus phage S-B05	542	441	56	169	11	4	0	155	29	300	68	440	71	23	15	18	78	43	25	12244	172	517	123	15	104	89	121	125	290	23	27	7	13	279	193	121	202	248	36	16	18	329	29	24	13	8	55	33	11
Synechococcus virus SCAM3	537	765	114	293	21	20	0	297	52	626	57	514	434	82	96	22	71	92	34	15527	513	1472	110	7	137	173	182	165	574	22	118	61	57	326	226	145	219	386	23	13	24	475	55	21	54	44	165	48	16
Parcubacteria group bacterium Athens0714_16	536	413	78	151	21	21	1	145	24	231	110	262	45	13	7	6	62	108	35	6989	119	365	69	7	69	103	112	126	161	21	163	74	70	197	131	82	171	177	30	15	26	340	23	29	57	56	177	63	25
Synechococcus phage S-CAM8	531	347	63	149	13	6	1	141	29	292	39	274	52	11	11	21	118	47	21	8143	148	389	131	16	84	123	152	104	259	85	51	28	35	226	149	105	140	223	24	15	17	204	20	22	11	15	53	51	12
Coxiella sp. DG_40	529	165	29	51	32	114	1	52	10	119	88	184	58	13	12	25	119	416	204	4324	77	173	148	16	53	62	80	118	526	73	469	217	257	171	92	53	184	278	66	2	11	210	44	73	213	184	829	30	9
Synechococcus phage S-B43	513	646	110	247	14	8	0	274	51	596	65	328	111	26	28	11	76	45	20	10246	203	598	105	11	97	114	163	97	238	18	39	15	15	214	158	99	166	238	16	21	21	331	34	21	23	15	68	70	13
Prochlorococcus virus PTIM40	510	1101	148	422	13	11	0	332	65	636	86	233	124	27	39	1	32	51	18	6485	162	476	49	3	66	83	101	85	280	9	30	13	11	151	103	60	124	169	11	36	64	384	42	19	27	20	46	54	9
Candidatus Heimdallarchaeota archaeon	498	319	54	124	34	193	7	111	20	194	105	257	114	18	27	21	150	516	226	6198	119	320	149	14	99	137	160	154	661	104	641	232	292	263	164	117	266	355	80	7	24	375	51	59	285	231	965	23	5
Synechococcus phage S-PM2	498	593	81	238	8	22	0	259	38	555	61	264	131	28	29	10	33	93	40	8453	237	612	68	7	107	134	187	119	415	17	145	60	54	316	176	107	193	297	14	22	26	413	62	14	75	55	170	46	9
Pseudomonas stutzeri	495	368	84	155	40	269	4	122	23	282	129	140	188	39	46	38	165	938	394	3710	128	377	465	39	145	190	226	434	1904	100	2263	1000	840	360	206	201	443	813	158	20	34	349	202	108	2451	2441	193727	69	16
Synechococcus phage ACG-2014d	486	501	71	187	14	16	1	212	37	392	63	347	111	20	20	11	86	100	49	10547	206	604	129	9	106	145	188	146	302	18	116	46	42	284	175	116	232	291	18	18	28	350	29	22	68	34	177	51	19
Synechococcus phage S-CAM22	483	514	87	229	7	5	0	199	25	384	64	680	171	42	40	25	106	75	33	20755	395	1111	146	32	91	126	140	106	260	21	36	11	8	244	147	93	158	271	15	18	18	300	18	23	11	10	34	67	19
Synechococcus virus PSSP2	479	54	8	25	16	4	0	27	1	50	42	98	7	0	2	10	32	7	3	2528	7	43	74	4	13	9	19	6	70	7	4	1	1	36	19	10	15	56	2	3	4	40	9	15	5	1	2	4	2
Pelagibacteraceae bacterium GOM-A1	477	48109	8084	19008	19	5267	158	34697	6243	70502	74	360	25946	4987	6097	15	61	17567	7179	7675	27463	79266	79	7	9966	11481	14202	26846	89247	29	26666	10411	6769	23642	15143	10362	72470	32692	24	497	791	79255	7225	22	5703	4601	18594	8289	2548
Pseudoalteromonas sp. TMED43	472	398	65	159	11	43	1	165	24	323	54	138	346	85	80	12	96	204	83	3685	320	951	145	14	65	87	97	215	834	14	132	59	100	171	88	78	352	602	16	8	6	170	42	29	65	54	961	21	2
Synechococcus phage ACG-2014h	467	1253	175	480	10	16	0	491	92	995	60	302	266	75	64	6	52	67	29	9398	352	962	62	4	102	148	182	119	480	15	89	26	35	270	164	107	144	304	13	31	42	361	66	17	41	27	98	49	14
Candidatus Thorarchaeota archaeon SMTZ-45	463	398	53	152	17	18	0	184	32	359	66	414	84	12	18	16	70	83	32	11095	178	562	91	17	111	164	175	187	261	19	63	26	26	324	200	135	246	257	37	7	9	304	22	33	23	14	93	37	13
Gammaproteobacteria bacterium TMED226	459	7986	1307	3125	13	230	8	5920	1030	11815	39	258	4967	938	1111	15	103	833	328	5050	4952	14238	165	13	5885	6914	8424	17690	61127	26	1024	441	458	13685	8697	5923	26517	28324	12	58	114	5583	875	35	286	217	806	658	230
Pelagibacteraceae bacterium TMED232	457	11276	1883	4441	16	1574	52	7021	1252	14532	103	413	5575	1072	1290	12	117	5259	2231	13259	6747	19146	109	9	5385	6221	7667	14270	38927	60	8962	3454	2274	13493	8610	5899	39149	16141	73	170	214	19705	1431	49	1963	1542	6171	1345	396
uncultured phage MedDCM-OCT-S09-C5	455	29	8	15	23	5	1	18	2	39	53	112	3	1	0	10	61	12	7	2869	8	31	100	8	13	20	24	13	31	43	34	11	10	35	31	23	22	28	21	6	7	39	0	21	10	8	24	6	2
Prochlorococcus virus 951510a	455	62	16	42	14	0	0	19	1	42	37	107	16	3	2	17	72	6	2	2908	16	46	108	7	6	7	17	8	44	8	1	0	0	36	10	7	5	36	4	2	1	28	7	10	0	0	2	1	1
uncultured Alphaproteobacteria bacterium	432	699	141	273	25	5859	195	352	55	650	48	124	428	89	106	15	85	18265	7613	3008	385	1055	130	14	531	567	739	1053	4234	53	19540	7724	6234	1188	738	524	2521	1701	23	15	27	1514	256	41	6597	5356	25582	59	12
Pelagibacter phage HTVC106P	430	17	3	7	15	4	0	14	3	23	45	134	4	0	1	18	95	17	17	3441	19	56	133	9	23	26	32	28	85	59	22	14	14	44	28	23	36	47	37	6	7	48	3	27	10	6	22	10	1
Synechococcus virus STIM5	429	411	61	172	16	8	0	143	25	260	57	355	111	12	19	7	82	44	21	10123	206	559	97	8	39	64	61	55	121	17	44	23	11	124	85	43	97	104	9	6	4	180	15	17	10	12	35	27	7
Rhodobacteraceae bacterium	429	46051	7652	18364	6	4587	133	19257	3335	39619	137	452	32820	6214	7693	10	64	15216	6766	7421	19421	54595	127	13	52145	64128	77681	29386	614868	29	23282	9610	10660	132957	85477	58006	100742	272171	75	585	796	18184	10789	74	7947	7157	148787	3802	1148
Thaumarchaeota archaeon	424	1738	289	604	19	138440	4454	632	115	1314	49	302	1724	331	425	5	50	429496	179668	7519	1248	3503	74	10	2648	3001	3732	8151	22015	34	485244	195407	80669	5886	3789	2562	22616	8479	45	43	75	16938	1179	25	227456	186339	458452	109	39
Blastopirellula sp.	423	1883	415	791	25	1703	43	335	45	758	82	152	1101	227	258	23	143	5491	2663	3683	567	1488	152	18	353	464	576	316	5650	84	9442	4189	6108	872	624	479	411	3579	44	103	152	490	1039	72	2820	2697	14894	35	11
Chloroflexi bacterium TMED70	420	709	113	288	25	69	5	458	89	932	68	173	453	97	106	29	123	289	128	4267	598	1743	147	18	934	1062	1325	4713	13274	102	478	183	244	1584	1052	717	10647	4462	44	33	70	6308	673	41	59	78	321	33	9
Candidatus Pelagibacter sp. TMED128	419	23613	3987	9325	5	4197	130	14755	2744	29794	21	390	15903	2999	3773	5	31	13475	5650	10597	18373	51850	56	4	15969	18535	22972	36880	114075	36	20249	7900	6225	37608	24114	16336	96616	42957	24	405	578	53756	4656	18	4768	3721	17147	2966	944
Desulfurellales bacterium	417	88	18	28	16	59	2	27	6	58	83	135	17	9	5	19	97	165	90	3203	27	76	143	15	33	42	52	42	166	69	250	116	127	72	61	33	82	118	34	14	12	145	27	55	122	112	464	11	6
Synechococcus virus SWAM2	416	1458	203	605	7	19	0	637	124	1311	46	215	231	46	50	5	23	49	23	7095	312	958	50	3	71	83	116	69	336	10	51	17	10	158	127	80	90	241	7	16	28	305	39	8	22	14	64	53	19
Pelagibacter phage HTVC035P	404	31	7	19	23	2	0	15	4	28	85	251	10	2	2	25	159	37	15	5237	42	120	216	20	17	22	24	20	82	74	14	6	4	32	22	15	20	49	39	6	5	90	8	53	5	10	16	11	3
uncultured Mediterranean phage uvDeep-CGR2-KM24-C165	403	19	6	14	17	9	0	13	4	18	38	66	6	2	0	6	69	24	8	1925	16	44	98	8	40	57	67	61	177	162	36	12	10	98	53	46	88	103	71	6	7	84	9	87	20	20	63	18	4
Pseudomonas aestusnigri	400	26	5	10	6	30	2	9	2	24	150	11	336	74	73	1440	7650	75	43	95	9	24	38438	3950	2386	2605	2813	3234	33255	203	13799	7206	8839	3492	2373	2764	1344	10447	193	286	364	1380	2447	42	30732	29948	281321	53	16
uncultured cyanobacterium	397	230	29	79	9	1	0	92	11	149	40	93	22	7	8	3	20	13	4	2244	29	96	31	3	35	59	52	8	300	3	2	2	3	135	93	51	21	165	0	2	2	94	27	13	2	4	10	17	2
uncultured Bacteroidetes bacterium	395	188	27	59	11	239	7	76	15	145	52	199	40	3	11	6	70	682	288	4927	79	232	84	7	166	208	272	356	475	60	810	324	203	441	267	199	478	381	42	10	24	724	40	32	537	485	1342	37	10
Pelagibacter phage HTVC109P	391	45	3	19	13	12	0	33	4	56	34	176	25	9	4	18	96	64	29	3840	36	122	157	19	14	21	15	32	116	20	119	65	58	40	25	20	44	48	8	4	2	54	7	7	45	37	121	15	2
Pelagibacter phage HTVC010P	385	15	0	3	14	1	0	9	0	14	41	73	5	0	0	13	42	14	9	1918	2	20	78	4	24	37	44	24	88	103	23	10	13	57	34	29	51	50	33	7	5	55	7	58	14	11	53	17	5
uncultured phage MedDCM-OCT-S08-C239	379	60	10	24	4	0	0	15	5	42	29	68	5	1	1	4	22	14	2	1896	6	41	46	7	13	15	17	10	41	9	13	6	1	30	26	11	20	26	5	2	3	44	10	7	1	2	1	15	5
Prochlorococcus T7-like virus P-TIP34	378	52	5	21	12	0	0	17	1	27	47	57	7	2	3	3	37	2	0	1400	6	25	61	2	3	9	11	4	24	5	0	0	0	20	7	8	11	18	6	3	1	47	7	7	1	0	2	5	1
Synechococcus phage S-CRM01	374	176	31	71	12	18	0	75	13	165	59	238	49	6	13	5	41	99	36	5882	69	233	76	4	136	146	190	128	380	39	141	61	61	273	185	127	251	271	38	3	11	237	14	16	54	63	210	14	6
Cyanophage KBS-P-1A	373	85	15	34	7	0	0	32	6	48	34	95	18	6	2	10	52	7	0	1874	15	45	66	7	10	6	11	2	32	1	0	0	1	14	14	8	6	38	2	0	1	17	2	4	0	0	0	0	0
Acidithiobacillales bacterium SM23_46	372	37	4	5	21	41	0	14	1	35	91	128	14	4	9	25	127	126	50	3203	13	38	151	9	25	21	30	33	128	112	163	58	85	57	45	23	31	61	72	1	4	46	12	87	70	76	302	15	4
Flavobacteriales bacterium TMED84	371	2853	458	1147	23	561	25	2046	354	3990	47	208	1828	332	444	13	82	1909	767	4722	2146	6238	103	6	2040	2494	3040	626	19121	39	4522	1780	2094	4543	2789	1989	1911	13603	15	72	131	979	849	25	1912	1477	4274	9528	2840
Methylophilaceae bacterium	364	191	30	78	11	166	5	95	16	169	78	119	109	21	28	12	93	539	202	2672	101	252	95	11	167	244	286	744	1508	37	829	380	353	539	365	220	941	696	23	5	5	295	76	56	231	215	1307	32	3
Euryarchaeota archaeon TMED85	358	773	118	291	14	80	3	357	68	809	19	198	311	52	61	3	31	325	143	5611	429	1223	53	8	270	354	424	748	2800	22	489	185	184	710	449	289	1324	1546	14	22	25	1745	137	17	172	133	509	60	18
Micromonas pusilla virus SP1 sensu lato	352	5578	911	2178	2	11	0	1304	226	2630	25	1317	1223	263	315	27	159	130	67	36705	3382	9044	87	4	98	149	152	83	337	0	80	33	21	250	159	106	424	258	7	2	0	144	10	0	19	13	28	2	1
Rhodospirillaceae bacterium	352	7944	1911	3285	17	5223	189	1745	297	4106	85	152	3390	736	866	13	78	16449	7391	3355	2431	6032	125	15	1487	1977	2275	2179	18833	45	22405	9315	11471	3728	2443	1750	4324	9031	44	143	201	4717	2017	107	7829	6998	36288	410	141
candidate division MSBL1 archaeon SCGC-AAA382A20	348	14	3	4	15	33	1	5	1	13	62	136	6	2	2	21	96	113	50	2822	4	22	104	12	10	15	19	4	77	64	125	42	50	37	29	17	11	35	51	2	4	28	12	45	109	78	288	2	3
uncultured Mediterranean phage uvDeep-CGR2-AD10-C281	345	22	4	6	15	125	4	12	3	17	61	61	6	4	2	12	62	372	166	2173	8	25	72	8	21	15	16	41	78	37	374	162	156	39	30	13	46	45	47	2	4	74	7	52	385	274	1189	8	2
Acidimicrobiaceae bacterium TMED224	343	1780	355	730	2	329	9	315	43	697	14	171	1715	357	409	4	39	1681	825	3870	554	1440	55	11	1011	1408	1615	1949	22581	9	4355	1833	1993	2286	1535	1083	2632	9736	7	58	64	2100	886	8	538	461	2147	29	9
Pelagibacteraceae bacterium TMED268	341	16735	2842	6453	5	8257	255	11605	2065	23285	17	249	9363	1823	2094	3	16	27073	11151	7237	10690	30877	20	2	10052	11271	14097	27301	85013	11	52813	20318	11789	23278	15120	10130	76890	31602	15	198	303	43365	3569	5	9168	7361	29709	1352	401
Prochlorococcus phage P-RSM4	339	368	55	157	14	1	0	179	30	293	47	119	32	9	8	1	27	11	5	3764	67	216	32	1	45	68	65	45	102	8	1	3	1	108	73	47	88	120	1	12	30	204	22	13	5	3	5	53	14
Candidatus Nitrosopelagicus sp.	333	7054	1182	2842	9	1772	58	1419	259	2820	88	337	5583	1084	1350	15	98	8286	3546	11398	3763	10940	114	12	2779	3420	4204	13671	21721	61	26151	10209	4356	6744	4393	2892	19351	8668	74	98	129	29457	1424	33	2216	1701	4445	166	43
Synechococcus phage S-RSM4	329	1141	178	417	6	16	0	516	72	862	37	210	213	43	42	2	26	31	20	7078	286	798	54	5	73	79	95	53	248	4	36	19	13	147	94	52	97	177	6	23	31	264	24	7	13	21	31	60	15
Prochlorococcus sp. TMED223	327	27	6	20	33	11	0	5	2	19	76	98	38	11	9	16	109	21	9	2468	4	15	90	13	12	29	23	21	89	63	40	13	23	49	40	19	31	81	38	7	7	33	66	54	21	12	43	6	1
Candidatus Nitrosopelagicus brevis	321	38700	6549	15545	1	5129	184	6672	1180	13363	1	161	30676	5747	7030	0	2	21353	8904	3443	19712	56278	5	0	86620	101126	124288	437177	727953	0	66365	25829	11399	192949	124295	84916	636939	250048	7	930	1554	639203	30023	0	6356	5277	12936	4	1
Cyanophage KBS-S-1A	314	44	6	24	5	0	0	17	1	35	38	203	17	2	3	18	101	13	7	4118	13	40	166	13	9	11	12	14	63	4	1	1	0	32	21	14	5	55	1	2	2	17	0	7	0	1	0	2	0
uncultured Mediterranean phage uvDeep-CGR2-KM18-C269	314	8	2	2	5	23	2	5	1	5	21	71	3	0	1	5	29	69	27	1555	5	9	59	4	9	10	16	5	50	33	109	45	55	23	16	7	14	26	9	5	4	20	8	21	53	38	118	2	0
Ruminococcus flavefaciens	311	361	71	133	10	272	7	200	35	340	25	85	164	41	31	4	32	781	342	1802	148	472	55	5	141	155	204	287	1274	15	1058	454	488	328	182	145	561	650	4	13	12	417	97	11	408	344	1606	50	18
Pelagibacteraceae bacterium TMED233	305	1359	219	559	17	2159	64	1047	181	2092	64	106	884	178	184	9	67	6812	2859	2736	980	2856	114	10	1194	1354	1609	2812	9161	57	10263	4058	2465	2680	1730	1181	8115	3405	39	31	44	3520	268	58	2513	2030	8708	167	38
Bacteroidetes bacterium MED-G21	302	17060	2785	6607	9	452	22	10248	1807	20490	27	163	2082	385	496	2	33	1147	499	3519	3138	8641	50	7	5998	7358	8925	1147	63882	24	2207	855	1254	8870	5627	3880	4036	57420	9	37	65	580	814	11	653	497	2232	197	68
Roseobacter phage CRP-3	298	26	5	11	13	7	0	12	2	24	35	120	9	2	2	14	83	16	13	2382	24	62	90	8	20	14	17	13	68	36	23	11	15	43	22	17	25	37	22	4	5	54	5	26	13	16	34	13	3
Virus sp.	296	11	1	5	0	2	0	4	0	5	6	126	10	2	3	1	13	8	2	1817	2	8	18	5	6	5	8	0	37	0	21	13	8	23	9	5	4	11	0	3	1	8	6	6	1	4	6	36	8
Acinetobacter baumannii	296	2064	508	790	3	470	12	471	86	1084	36	134	782	150	196	11	43	2026	874	4294	556	1583	82	13	1164	1453	1694	650	5692	11	2557	1026	879	2349	1613	1251	852	3663	23	71	99	730	213	18	948	788	5076	230	57
Flavobacteriaceae bacterium TMED145	296	45472	7541	17558	1	781	31	31907	5864	65547	0	556	30504	5909	7273	0	2	2829	1148	5036	22656	65693	4	2	12888	14836	18143	5680	136676	0	2644	1035	1383	33031	21078	14481	14771	101585	0	117	187	3475	3200	1	446	313	1393	2122	619
Synechococcus virus SIOM18	294	379	58	134	5	11	0	145	25	284	40	404	146	24	21	13	76	61	35	13688	300	790	108	13	57	65	97	76	190	0	59	23	8	169	89	59	134	181	9	9	24	200	30	18	19	16	53	26	15
Ostreococcus tauri virus RT-2011	292	4883	808	1955	3	18	1	1176	212	2275	26	1221	1061	242	280	26	122	137	63	33589	2940	8053	91	11	53	82	92	31	186	0	47	16	11	134	85	62	223	178	2	3	4	105	3	0	8	7	19	7	1
Candidatus Pelagibacter sp. RS39	292	83194	13812	32603	0	6826	224	58498	10605	118876	3	732	46468	8860	10719	0	6	22580	9365	17978	55431	160230	15	2	31685	36358	44824	78257	227264	2	35254	13911	8802	78635	49549	34139	230618	89572	0	734	1236	129317	9682	4	7627	6122	24669	10179	3090
Prochlorococcus sp. HOT208_60m_810B23	286	10508	1675	4172	0	104	4	11520	2051	23272	3	39	728	127	177	1	14	143	56	895	1277	3649	27	1	711	847	1109	117	7906	2	66	45	58	1849	1154	773	1100	5492	0	101	170	3680	2893	4	99	91	341	1954	624
miscellaneous Crenarchaeota group-1 archaeon SG8-32-1	286	70	11	32	17	19	0	29	3	40	33	117	14	3	4	9	36	48	26	2803	30	81	55	5	19	24	35	30	79	18	76	27	38	43	32	21	51	46	15	7	17	122	10	39	35	27	106	7	2
Lake Baikal phage Baikal-20-5m-C28	285	277	51	110	7	52	0	73	20	207	25	205	105	21	20	13	34	172	80	5124	107	364	87	8	74	92	119	108	388	9	579	207	254	197	120	81	193	267	14	7	12	260	23	15	148	121	454	27	14
Verrucomicrobiales bacterium	284	3946	945	1579	16	10034	271	543	74	1379	31	122	2053	392	501	10	81	32112	15992	2428	1061	2531	88	8	1170	1560	1775	662	18896	66	62789	28270	36675	2831	1850	1252	1009	10514	27	130	194	779	1147	41	22581	22523	125040	12	3
Pelagibacter phage Kolga EXVC016S	283	35	6	14	9	10	0	14	1	19	56	88	8	0	2	15	47	30	17	2047	14	30	59	15	20	29	31	28	84	66	103	40	32	54	36	27	49	60	61	2	3	47	8	37	36	29	115	11	1
Synechococcus virus AC2014fSyn7803C8	280	226	48	119	6	8	0	95	19	176	34	139	44	5	7	11	29	29	22	4447	92	227	40	0	79	108	122	106	194	13	24	14	17	200	115	77	125	198	16	9	12	194	19	12	18	14	44	36	9
Synechococcus phage S-H9-1	280	690	112	267	8	12	1	308	45	572	44	188	156	33	37	5	30	51	25	6738	221	571	51	8	74	78	128	85	384	11	63	36	26	183	115	83	107	240	6	12	11	218	43	10	31	19	73	39	13
Micromonas pusilla virus SP1	279	3995	693	1548	0	7	0	1046	179	1982	24	1182	1027	206	243	20	143	152	65	34211	2836	7687	103	11	46	66	72	45	176	0	104	58	23	203	136	82	348	187	3	1	1	123	6	0	11	12	20	2	1
bacterium TMED144	278	18701	2993	7485	1	8925	300	10753	1908	21865	1	218	9852	1876	2321	1	1	29095	12645	8522	10579	29815	14	0	1971	2479	2976	22017	42303	0	30045	12161	19254	4246	2610	1797	37217	23780	0	183	249	31605	2380	1	7306	6217	33937	1159	330
Prochlorococcus phage P-HS2	278	5	1	1	14	0	0	0	0	7	17	70	0	0	0	8	35	6	4	1492	1	5	70	5	1	1	1	0	2	0	0	0	0	1	0	0	2	1	4	0	3	3	0	12	0	0	0	2	1
Mesorhizobium sp.	277	943	224	393	8	845	26	350	52	735	49	105	479	107	103	6	71	2579	1166	2692	385	1014	96	17	351	459	524	633	3474	32	3589	1444	1561	872	555	398	1171	1686	29	25	37	820	262	65	1390	1214	9900	103	29
Prochlorococcus sp. HOT208_60m_808M21	275	10028	1623	3941	1	92	3	10971	1930	21963	7	39	708	138	160	3	10	144	60	949	1176	3513	25	4	949	975	1271	120	9669	1	85	36	53	2175	1403	1000	1334	6366	0	103	161	3482	2805	5	103	83	397	1851	595
Candidatus Pelagibacter sp. TMED118	274	27902	4818	10920	2	6503	212	18448	3262	37098	14	281	13001	2490	3018	7	30	21342	8812	6850	14310	40537	48	6	10301	11473	14480	33355	90992	11	35290	13797	8743	24561	15625	10626	75371	36017	9	371	562	56964	4967	8	7165	5573	23291	4450	1396
Synechococcus phage S-H25	271	380	54	131	5	2	0	112	20	262	36	222	78	18	14	7	39	27	15	7073	135	421	71	5	40	49	73	65	138	6	23	15	6	104	68	55	81	106	5	7	10	190	16	11	9	3	27	22	8
Pelagibacterales bacterium	263	61231	10370	24208	1	188276	6085	37559	6655	75504	3	447	36121	6956	8533	1	8	605147	250771	11716	38235	108766	16	1	59069	68308	84195	149881	468362	2	781503	308274	229947	136386	87067	59818	362432	171580	3	883	1362	171093	17295	3	207365	168714	802915	4193	1273
Synechococcus phage S-SSM7	262	416	62	168	5	6	0	185	25	375	26	92	77	10	13	3	19	10	3	2547	95	266	19	4	34	51	36	31	214	3	0	1	0	89	55	42	57	101	3	13	15	252	45	7	0	2	6	34	10
Ignavibacteriales bacterium	261	981	172	406	8	927	30	550	96	1035	42	156	541	94	129	4	22	3180	1423	4587	545	1620	27	1	312	361	480	1038	3864	14	3791	1469	2353	672	446	295	1981	1977	14	20	42	1518	409	9	1239	1012	5715	96	29
uncultured T7-like podovirus	256	18	1	7	8	1	0	7	3	22	33	94	3	1	1	11	75	11	4	2197	8	18	92	6	5	8	10	15	46	18	20	7	14	24	14	10	12	31	13	2	1	25	3	12	7	6	8	1	0
Geobacteraceae bacterium	256	187	42	69	29	145	2	49	11	121	54	81	74	17	18	16	109	415	195	2195	61	191	111	14	41	55	78	90	335	72	553	212	214	93	61	46	131	192	26	9	8	375	88	55	253	219	929	21	1
Podovirus SOG	256	54	11	24	12	6	1	8	1	31	44	112	13	2	2	12	62	27	10	2196	8	31	85	6	26	38	29	15	129	34	60	26	30	62	44	29	23	67	15	1	2	61	7	19	18	16	44	9	4
uncultured phage MedDCM-OCT-S05-C532	256	28	3	8	3	0	0	9	1	21	18	49	4	0	2	3	22	3	2	1097	6	14	32	4	7	8	4	3	25	7	7	1	2	9	8	5	3	23	3	1	1	22	2	6	1	0	6	3	2
Gammaproteobacteria bacterium TMED281	255	683	116	290	15	76	2	193	33	387	40	131	220	44	64	13	87	340	136	3368	217	636	87	9	105	134	131	160	942	32	442	165	183	275	173	101	394	527	12	9	8	376	55	21	130	110	463	43	18
Robiginitomaculum sp.	253	2099	386	866	11	990	42	1001	162	2036	61	137	1110	207	245	1	45	3277	1558	3309	1098	2893	88	8	758	916	1140	1983	7378	21	4782	2005	1913	1870	1188	812	3234	3240	42	39	38	2513	430	34	1545	1225	6901	187	61
Marine Group II euryarchaeote MED-G33	252	13426	2202	5481	1	2725	64	2661	401	5632	0	209	5466	1124	1246	2	0	8850	4181	4040	1065	2770	19	2	1248	1744	2023	2792	41412	0	13915	5587	11628	1899	1173	811	2035	13520	1	503	785	2867	4042	0	3941	3680	25918	12	5
Candidatus Puniceispirillum marinum	249	6652	1287	2665	9	510	19	1909	313	4253	27	100	2298	435	549	5	60	1839	799	1996	1673	4411	75	7	1140	1501	1904	996	15751	36	2674	1080	1054	3385	2254	1599	2735	8920	21	69	92	1441	762	27	732	632	2706	1254	315
Marine Group III euryarchaeote CG-Epi3	248	4052	652	1564	0	520	22	1547	287	3253	1	78	1665	303	412	1	4	1740	775	1736	1416	4003	7	1	985	1266	1475	4858	24813	1	3068	1228	1861	1745	1062	707	6860	9531	0	79	125	3373	2104	3	493	446	2410	60	12
Rheinheimera aquimaris	248	44	10	17	0	43	0	11	6	46	4	0	25	6	7	3	16	134	65	41	22	52	33	2	23	17	15	144	379	0	167	63	249	125	95	75	119	112	0	2	6	5167	128	7	215	190	11160	9	3
Alphaproteobacteria bacterium MarineAlpha6_Bin2	246	728	128	273	12	3489	120	444	80	911	21	81	473	87	120	3	34	10487	4315	2345	490	1378	38	4	403	435	590	857	4026	32	7329	2851	2441	920	597	392	2422	1463	30	13	23	1716	264	12	4145	3374	16852	54	16
Cyanophage KBS-S-2A	245	17	3	1	7	1	0	1	3	5	14	80	3	0	0	9	43	7	4	1962	3	13	90	8	7	25	19	14	39	37	1	1	2	38	34	9	20	18	16	3	4	4	0	12	1	0	3	4	1
Flavobacteriaceae bacterium	245	1385	240	591	8	590	16	799	138	1590	36	86	1031	200	229	14	63	2364	935	2338	796	2249	46	6	740	859	1034	1041	7719	39	3470	1432	1914	1873	1145	796	2466	4794	26	14	30	1098	346	16	952	857	6438	177	55
Haloquadratum walsbyi	245	169	28	53	13	76	1	59	12	129	46	153	42	11	11	9	47	235	97	4362	73	188	108	11	72	74	103	85	324	32	279	102	133	164	104	69	199	199	11	11	10	294	29	19	115	125	479	11	1
Pelagibacter phage HTVC031P	244	14	2	7	3	5	0	6	3	23	20	82	9	4	3	12	47	35	17	1900	15	45	67	4	8	17	19	21	68	18	77	30	37	26	17	4	31	45	13	1	3	34	3	13	25	22	83	12	0
Pelagibacter phage HTVC202P	241	53	8	6	4	4	1	10	4	28	24	98	12	3	0	6	37	15	6	1969	8	33	87	7	15	9	17	11	51	30	23	6	5	27	16	11	27	21	10	4	3	35	2	22	10	8	36	11	3
bacterium TMED217	241	23665	3809	9275	0	7511	250	9147	1610	18451	5	204	11643	2253	2862	1	2	28406	12096	2431	12250	34443	15	2	5379	6640	8219	52892	113875	3	39140	15809	19930	11582	7383	5072	85800	64923	1	314	485	17346	5338	3	7925	6571	30223	333	78
Prochlorococcus sp. HOT208_60m_808A10	238	7388	1205	2845	0	53	8	7659	1413	15886	7	29	475	90	130	5	13	68	27	820	841	2407	30	2	581	702	799	75	5994	0	12	7	28	1500	939	679	836	4098	2	74	131	2630	2204	6	59	61	220	1437	432
Prochlorococcus phage P-SSM4	238	341	49	123	6	2	1	128	23	242	38	125	41	8	6	1	13	14	5	3364	63	187	24	1	18	23	34	18	77	1	3	1	1	60	39	23	54	82	6	12	16	171	11	11	1	0	3	41	11
Nonlabens xiamenensis	237	731	124	300	7	33	0	293	44	555	34	108	143	35	41	2	12	143	72	3074	132	405	22	0	111	112	138	116	715	7	192	71	87	238	150	108	279	547	6	21	30	303	60	7	113	70	1547	41	12
Cyanophage S-RIM32	237	337	49	131	3	19	1	147	26	308	26	135	91	18	15	5	26	56	14	4425	131	380	24	3	51	88	95	68	177	17	81	31	36	147	84	51	103	156	16	12	11	204	24	11	28	40	109	29	19
Pelagibacter phage HTVC112P	237	14	2	3	6	5	0	3	0	13	10	71	5	0	0	7	34	23	10	1531	5	29	81	5	22	17	24	7	73	39	23	8	8	42	32	17	45	43	9	2	3	25	1	10	7	8	23	4	2
Candidatus Parcubacteria bacterium	236	612	109	254	9	931	36	314	63	561	41	99	337	58	84	5	47	2827	1205	3016	307	864	59	10	275	382	446	587	2563	28	3296	1288	1431	699	480	321	1245	1368	20	23	28	972	231	17	1336	1122	4628	57	16
Prochlorococcus T7-like virus P-TIP42	236	32	6	14	1	1	0	11	0	20	21	29	5	3	3	2	4	2	1	896	3	11	21	2	2	0	5	0	8	3	0	0	0	3	4	0	2	6	1	0	0	24	2	0	0	0	0	2	1
Synechococcus phage S-H9-2	235	389	55	176	7	11	0	164	31	299	42	219	113	14	21	6	21	43	25	6225	162	447	45	2	79	93	98	77	223	12	77	23	29	145	113	70	118	163	11	4	15	175	31	7	18	20	79	27	10
Synechococcus phage S-H1	235	20	1	15	6	1	0	4	1	11	20	86	6	1	1	12	48	13	4	1891	2	4	99	12	5	8	11	2	16	38	1	1	0	20	13	7	7	12	15	4	0	13	0	15	2	0	4	1	0
Synechococcus virus STIM4	235	252	41	94	7	2	0	124	12	196	22	94	31	2	6	6	15	13	3	2856	61	184	12	1	9	26	11	13	52	1	0	0	0	37	21	21	27	47	4	7	14	149	11	4	0	0	5	36	11
Synechococcus phage S-H34	234	141	21	52	8	4	0	46	15	106	25	156	20	2	13	6	26	30	17	4155	65	174	26	2	54	94	108	67	203	20	50	23	13	175	95	82	119	143	20	3	7	125	7	11	19	14	42	6	4
Candidatus Kaiserbacteria bacterium	233	386	77	143	3	77	2	89	23	224	27	83	109	24	23	6	14	274	125	2238	104	259	37	4	101	139	198	191	532	4	369	158	179	294	175	106	262	297	15	25	29	277	43	7	358	303	539	54	10
uncultured phage MedDCM-OCT-S05-C113	232	33	9	28	12	31	0	12	3	36	37	61	10	3	2	5	41	79	33	1881	17	58	56	4	21	34	32	45	120	33	160	67	75	61	40	18	62	68	29	0	7	72	8	17	64	51	189	9	2
Prochlorococcus sp. HOT208_60m_813I02	231	11322	1919	4453	3	98	3	12025	2153	24763	10	39	723	139	169	0	12	158	63	1194	1361	3844	10	0	840	1044	1243	128	8934	0	55	27	42	1943	1238	884	1073	5847	1	145	230	4161	3366	3	122	112	392	2307	723
Fussvirus S30C28	230	64	6	25	5	38	1	42	2	78	17	83	30	6	8	7	39	128	51	1719	36	118	57	6	72	78	110	168	479	56	186	70	46	176	134	89	362	245	37	3	6	190	18	18	58	41	214	33	5
Rhizobiales bacterium TMED94	229	26205	4392	10320	0	849	23	17579	3156	35914	4	198	17544	3301	4059	0	1	3087	1336	1971	18859	55041	2	0	22252	25968	31872	54756	174743	1	4229	1687	1631	50250	32355	21972	60766	78567	0	144	253	21648	3099	2	941	773	3349	675	222
Planctomycetaceae bacterium TMED240	228	1693	272	660	6	351	15	303	51	629	22	194	1816	364	438	5	21	1888	878	3637	555	1417	48	6	172	227	294	168	2518	14	2294	938	1194	609	401	266	265	1648	15	28	43	344	325	14	549	548	3043	76	20
Pelagibacter phage HTVC026P	227	14	1	2	3	0	0	7	3	16	8	57	6	0	3	3	33	7	4	1370	6	26	46	5	8	23	21	16	61	28	7	3	5	23	20	10	26	36	5	1	6	21	8	6	3	1	9	4	1
Candidatus Dependentiae bacterium	223	168	38	55	9	86	3	59	9	137	38	79	57	15	12	6	50	287	100	2013	84	233	64	8	62	90	80	97	446	27	393	148	215	148	99	55	162	260	16	10	16	224	49	20	148	127	673	11	8
Cryomorphaceae bacterium	223	25578	4513	9946	3	939	32	22977	4132	46746	15	321	13433	2545	3296	4	14	3363	1383	2741	12334	36403	19	2	28940	32881	40772	46710	293671	15	14200	5499	8776	76884	48983	33520	138753	191551	8	190	292	11460	3918	2	1178	970	3986	4586	1371
Candidatus Actinomarinales bacterium	222	112753	18093	44077	0	726	26	55571	9956	111385	0	1131	59260	11141	13880	0	5	2946	1308	27210	57228	164654	13	1	19758	23679	29154	167608	108651	1	2870	1122	796	41340	26450	18097	280773	59885	1	820	1275	174708	4289	0	497	472	1400	2070	630
Burkholderia pseudomallei	222	675	300	266	2	371	10	125	16	358	9	49	204	53	59	1	27	1000	487	2154	225	492	26	3	430	328	376	180	1413	1	1151	553	471	534	322	377	198	416	9	52	78	224	81	12	579	521	1748	714	157
Gammaproteobacteria bacterium TMED222	217	1831	268	691	5	185	6	1061	174	2200	7	124	1056	229	231	3	17	636	227	3259	984	2932	30	0	837	1007	1197	3060	8969	8	816	313	336	1932	1300	889	4429	4382	6	35	61	5285	377	13	282	221	801	1079	328
Pelagibacter phage HTVC028P	216	96	12	46	4	11	0	39	9	87	17	60	32	11	11	3	34	52	12	1456	29	152	61	2	27	39	65	71	218	17	62	26	13	97	52	40	124	91	5	3	2	108	11	12	25	23	78	17	5
Pelagibacter phage HTVC121P	216	21	3	8	6	12	0	8	1	21	19	73	8	0	1	4	38	63	30	1623	15	38	48	6	8	4	21	20	61	12	126	38	38	26	22	13	23	32	7	0	3	42	5	14	28	31	96	3	1
Flavobacteriales bacterium TMED96	216	3002	511	1199	2	123	9	1630	288	3184	6	78	2367	471	528	1	15	453	192	5893	1418	4160	21	2	553	708	838	5763	9149	4	603	225	313	1361	921	584	5895	4589	4	27	28	2605	369	3	140	117	424	160	52
Pelagibacter phage Eistla EXVC025P	213	20	5	14	1	8	0	13	3	26	29	84	8	1	4	13	36	33	17	1986	21	46	74	8	11	11	23	21	72	19	62	32	23	30	18	13	37	33	14	1	3	35	5	18	38	19	83	5	3
Calditrichaeota bacterium	212	4109	691	1666	7	5891	188	1622	289	3373	20	106	2145	406	500	6	32	19735	8554	2421	1894	5221	31	2	974	1207	1379	4295	15247	14	22229	9189	13606	2073	1390	913	7058	8325	13	114	140	5879	1826	22	7373	6602	34544	205	60
Hyphomicrobiaceae bacterium	212	741	178	279	8	526	24	251	50	590	43	87	341	72	105	4	61	1730	753	2034	267	829	68	10	244	318	395	530	2672	34	2215	906	1024	624	398	294	962	1293	33	18	25	712	190	32	905	794	3760	52	11
Methanosarcinales archaeon	210	888	203	349	9	265	10	180	35	424	31	111	306	52	75	15	47	871	376	2836	250	648	44	8	395	556	619	178	1594	19	972	436	458	959	619	537	283	826	20	37	52	404	98	29	462	381	1586	106	33
uncultured Mediterranean phage uvDeep1-CGR2-KM23-C896	208	10	0	3	12	3	0	2	2	7	21	79	4	1	1	16	56	9	4	1891	6	7	79	5	5	12	19	5	37	31	45	15	18	39	16	9	14	21	22	0	4	21	3	25	5	3	12	3	0
Marine Group II euryarchaeote MED-G35	208	16484	3326	6909	0	204	2	3409	527	7679	0	154	4237	889	1040	0	1	835	411	2177	2799	7303	4	0	793	1141	1216	4509	20218	0	2990	1264	1587	1479	989	716	4034	8306	0	282	385	4249	2190	0	165	159	771	88	21
uncultured Mediterranean phage uvDeep-CGR2-KM23-C246	203	31	4	4	12	13	0	10	1	17	43	48	7	2	2	3	61	44	11	1139	4	17	61	4	2	2	8	11	38	15	32	17	32	11	4	5	25	23	11	3	5	58	6	24	29	32	85	5	0
Marine Group III euryarchaeote CG-Epi4	199	3536	604	1367	0	307	4	1488	271	2899	0	64	1402	261	320	0	1	1034	475	861	1153	3373	4	0	729	896	1077	4002	17671	0	1628	652	997	1285	852	528	5492	6960	0	54	71	2430	1498	0	279	268	1415	98	26
Pelagibacter phage HTVC025P	199	81	15	23	5	33	1	54	4	96	16	58	33	4	6	0	27	100	33	1169	37	118	34	4	33	42	44	70	213	13	112	52	48	72	53	21	139	119	5	3	3	140	16	9	43	43	170	32	6
Flavobacteriaceae bacterium TMED171	198	562	101	213	6	81	0	242	46	512	12	96	331	65	80	5	18	234	118	3059	254	752	34	1	173	219	269	523	1888	18	625	258	207	428	280	198	1188	1013	10	11	9	683	87	7	148	114	438	55	12
Bacteriodetes bacterium	198	908	160	338	11	930	35	464	88	1008	33	73	521	106	138	4	20	3071	1369	1687	538	1507	37	4	418	471	589	909	4460	11	4000	1583	2291	918	556	381	1741	2660	10	27	42	1127	369	11	1373	1209	11192	121	34
Prochlorococcus sp. HOT208_60m_813G15	198	12552	2143	4984	0	113	5	13403	2467	27655	3	20	894	145	185	2	4	158	56	428	1480	4422	11	0	863	995	1188	135	9809	0	49	17	40	2126	1392	944	1227	6531	0	179	231	4512	3564	2	104	71	419	2286	712
Oceanicaulis sp. HTCC2633	197	638	264	267	1	1823	62	120	19	448	309	19	204	33	42	0	3	1282	652	589	105	240	12	0	327	349	359	239	4962	30	2818	1475	770	684	471	609	156	4269	10	50	63	738	417	6	2517	2481	43037	207	46
Flavobacteriaceae bacterium TMED121	197	1536	240	585	2	587	22	853	145	1823	3	43	1307	237	309	0	5	1953	819	1810	833	2544	24	3	468	501	614	4082	7801	1	1997	841	1293	1152	685	496	6002	3374	1	24	46	5875	484	4	514	430	2255	80	31
Flavobacteriaceae bacterium TMED206	197	3781	616	1361	0	497	18	2207	400	4265	1	61	3124	560	733	0	2	1658	708	4750	2211	6266	10	0	1337	1436	1917	6067	17466	0	2049	895	1106	2900	1869	1268	10815	6996	1	78	115	4280	747	0	573	446	2333	309	84
Coraliomargarita sp. TMED73	196	800	138	301	7	158	7	397	89	819	20	96	525	113	101	4	18	527	198	1982	566	1591	53	2	298	369	425	916	2214	16	691	289	239	694	481	339	1773	913	10	26	23	1382	128	10	194	174	792	98	28
Synechococcus phage ACG-2014i	196	459	60	165	1	12	0	178	28	381	26	107	89	15	17	7	23	22	14	3120	113	342	18	2	39	45	65	47	153	5	32	11	16	85	76	39	79	131	7	5	19	133	12	9	18	10	35	14	8
Roseobacter phage CRP-5	192	17	0	4	8	7	0	4	0	9	21	49	9	2	1	20	66	20	15	1249	9	42	66	5	5	11	15	4	23	29	27	11	7	18	8	4	14	14	13	0	1	25	4	11	6	10	24	1	1
uncultured phage	191	109	15	36	3	1	0	23	3	43	14	45	21	2	4	3	32	15	1	1099	20	46	43	2	13	19	16	8	99	2	10	5	6	34	33	21	15	87	2	1	0	20	4	7	3	3	18	1	2
Cyanophage S-RIM17	191	242	38	119	4	2	1	91	15	188	17	99	44	5	5	2	16	13	4	2757	72	181	14	1	17	30	42	30	59	3	2	1	0	70	54	31	46	65	5	6	7	126	15	3	0	2	3	17	9
uncultured archaeon	187	750	147	307	10	1387	53	388	47	713	27	95	461	94	111	9	37	4060	1801	2921	360	1148	55	6	342	407	473	707	3177	17	4503	1793	1607	725	473	377	1618	1465	13	36	17	1343	263	16	2020	1752	6106	88	24
Chitinophagaceae bacterium	186	1784	335	764	7	1323	31	942	171	1931	30	98	1105	213	276	4	26	4541	1903	2492	1039	2663	54	4	853	1053	1308	1601	9194	9	5723	2321	3096	1899	1206	780	3553	5572	20	44	68	1812	578	12	1988	1688	9372	203	72
Gammaproteobacteria bacterium TMED182	186	3208	701	1340	5	642	17	681	117	1620	31	147	1227	242	315	5	31	2185	1076	3351	884	2276	45	1	446	594	671	894	7141	27	4879	1963	2160	1011	661	458	1107	3917	20	49	94	724	488	19	988	875	4625	177	35
uncultured phage MedDCM-OCT-S05-C429	185	14	1	8	1	0	0	15	5	30	10	17	3	0	0	0	4	4	1	566	4	10	14	1	1	2	5	1	15	0	0	0	0	2	2	1	4	9	0	0	0	3	0	1	0	0	0	2	0
Parcubacteria group bacterium ADurb.Bin216	180	44	3	19	2	35	2	20	2	36	12	60	22	3	6	7	42	102	59	1785	20	69	41	4	27	23	30	41	166	11	153	58	62	58	28	19	79	110	10	1	2	85	12	9	65	69	243	8	4
Planctomycetaceae bacterium	180	1649	318	653	3	2157	82	307	49	735	15	80	873	172	190	3	30	6486	3193	2240	483	1291	43	3	300	373	470	311	3981	23	9294	4123	6196	780	507	369	524	2547	11	97	175	594	1304	12	3471	3299	16033	88	28
bacterium TMED250	179	19737	3221	7888	0	3503	118	8761	1527	17542	0	131	9444	1832	2156	0	0	11510	4955	3775	10136	28459	4	2	3876	4457	5592	34631	57885	0	13121	5335	6922	8187	5496	3693	66302	32961	0	159	248	38470	3047	1	2880	2443	12580	645	201
uncultured phage MedDCM-OCT-S04-C348	179	27	4	17	10	1	0	13	1	19	79	42	3	1	2	2	25	5	3	1122	7	17	38	2	10	16	8	5	28	12	2	1	1	38	14	15	23	32	18	1	2	14	1	19	0	0	3	3	0
Roseobacter phage CRP-6	179	26	5	11	4	1	0	17	3	31	20	51	3	1	1	24	104	8	7	1585	16	41	49	7	7	10	14	21	46	36	52	26	7	38	15	14	27	35	16	1	4	67	8	15	5	3	13	10	7
Candidatus Wolfebacteria bacterium	177	137	17	47	8	70	2	42	7	121	24	83	45	7	14	6	31	228	95	2072	66	148	45	4	39	45	62	55	281	27	255	110	142	105	84	53	177	165	14	4	8	178	22	7	183	192	391	16	4
Synechococcus phage S-N03	177	137	21	41	5	4	0	62	6	104	18	108	27	1	8	4	20	22	12	2891	41	110	27	5	81	118	139	77	206	15	44	20	18	190	113	63	137	190	21	2	5	136	8	5	10	12	44	12	3
Prochlorococcus sp. HOT208_60m_813O14	176	13822	2255	5529	0	112	3	14797	2553	29503	8	22	928	172	227	0	0	150	70	416	1613	4535	1	3	1093	1347	1541	169	11420	1	68	22	44	2519	1547	1156	1399	7084	1	148	265	4766	3960	4	120	100	394	2395	709
Dishui Lake phycodnavirus 3	174	2014	303	790	2	10	0	478	91	945	11	526	504	110	107	7	43	97	37	13988	1308	3460	37	1	22	35	45	31	130	2	55	18	22	68	50	28	139	106	0	1	1	134	14	1	32	28	57	6	1
uncultured phage MedDCM-OCT-S09-C7	173	113	12	39	0	10	0	71	8	132	4	242	37	9	8	2	3	69	29	5909	141	402	23	2	39	59	61	37	200	1	214	82	100	86	59	54	119	145	2	5	9	95	15	2	30	35	123	12	6
Sphingobacteriales bacterium	172	1081	191	441	7	821	23	595	87	1179	29	86	668	127	146	2	20	2623	1175	2454	602	1661	39	1	522	669	823	792	5571	10	3446	1446	1758	1229	843	532	1922	3411	14	29	51	964	361	12	1215	1029	6150	130	46
Pelagibacteraceae bacterium TMED124	171	6640	1126	2606	9	2590	99	4251	754	8562	18	147	3697	732	874	3	21	8545	3506	3661	4165	12237	22	3	1858	1934	2507	4243	15784	16	9863	3887	3924	4168	2526	1766	10402	7029	9	115	193	16729	2432	9	2695	2278	11004	888	251
Pseudomonas aeruginosa	171	1313	300	513	2	447	18	280	48	646	37	74	597	135	135	28	123	1508	662	1785	410	922	559	63	549	747	834	898	4553	21	2161	964	1771	1222	820	637	818	2454	19	58	78	601	322	32	1932	1781	22706	156	45
Candidatus Pelagibacter sp. FZCC0015	171	38187	6274	14905	1	2132	75	29143	5363	59642	4	465	37647	7092	8815	1	7	7519	3105	9793	40520	119004	22	0	11569	13408	16594	30909	89146	1	11562	4410	2842	29339	18250	12488	91413	35894	1	232	390	47409	3705	3	2370	1882	7580	2721	801
Bdellovibrio bacteriovorus	169	405	80	164	5	239	6	183	32	393	19	69	180	57	48	5	31	771	348	1825	215	524	38	4	223	302	350	1907	2309	14	881	355	438	423	256	182	1118	763	8	9	21	634	126	9	815	660	1998	41	14
Epsilonproteobacteria bacterium	167	559	89	235	6	437	15	229	36	475	30	96	298	67	51	4	21	1352	607	2309	311	828	42	9	212	239	279	710	1882	17	1997	808	915	391	289	206	991	894	17	24	24	832	228	14	658	500	2442	62	17
Pelagibacter phage HTVC203P	167	12	4	5	3	1	0	5	1	14	23	72	3	4	1	7	42	10	9	1710	11	28	84	4	15	25	18	16	64	38	19	3	9	32	20	8	12	40	24	1	2	26	4	25	5	5	10	3	1
Oinezvirus S37C6	166	77	16	47	1	0	0	22	1	54	16	108	14	2	4	13	69	11	5	2481	25	69	133	9	8	5	16	4	25	5	1	3	0	12	10	11	4	23	2	0	1	16	7	4	0	1	2	0	0
Dishui lake phycodnavirus 1	166	533	73	206	5	17	0	161	31	292	22	168	112	24	35	2	9	60	26	4450	255	728	17	2	30	34	64	35	140	4	81	22	27	84	42	41	107	122	4	1	1	156	10	4	36	39	78	13	2
Synechococcus virus SRIM50	165	192	34	72	3	1	1	85	7	140	15	149	39	10	14	11	25	20	7	4039	78	217	25	1	17	39	50	29	85	5	25	9	10	81	47	37	57	70	9	8	12	109	11	7	6	2	20	12	6
uncultured phage MedDCM-OCT-S12-C496	164	4	0	2	3	0	0	2	0	2	2	53	1	0	0	1	17	5	0	986	1	6	43	4	0	0	0	0	1	0	0	0	0	1	0	1	1	2	0	0	0	1	0	2	0	0	0	3	1
Roseobacter phage CRP-4	164	12	3	7	10	3	0	6	1	14	28	51	5	0	0	13	60	16	5	1556	4	24	64	11	8	16	12	13	54	48	29	21	12	42	17	18	17	40	20	1	2	40	6	16	14	7	41	7	0
uncultured Mediterranean phage MEDS2 group	164	17	4	6	1	0	0	4	0	7	15	65	4	0	1	5	42	3	1	1684	2	5	54	6	3	4	5	1	4	18	0	0	0	7	5	5	4	7	6	1	0	10	0	4	0	0	1	3	0
uncultured phage MedDCM-OCT-S04-C650	163	77	15	35	4	2	0	17	8	41	23	1086	55	5	13	121	807	111	42	27262	62	141	1182	135	3	5	8	4	29	5	12	2	7	15	7	2	6	33	3	1	1	40	3	5	1	1	3	3	0
Stenotrophomonas maltophilia	163	402	133	164	4	278	7	92	13	254	27	50	179	34	44	12	44	1058	524	1404	119	338	71	7	146	146	166	234	1088	16	1190	504	743	286	177	148	246	543	12	20	29	253	98	20	580	489	3713	68	17
Pelagibacteraceae bacterium TMED195	162	16312	2860	6420	0	307	15	9817	1785	20263	9	114	15700	3037	3686	1	8	1270	571	1519	17905	51160	11	1	2543	2927	3643	1375	24192	1	931	387	394	6894	4450	3029	6502	10186	3	257	356	7663	7710	0	428	328	1340	2695	793
Megaviridae environmental sample	161	1420	244	611	2	431	13	748	131	1515	7	162	759	127	170	3	16	1293	530	4700	1054	3067	16	1	631	822	986	1040	4012	3	1859	712	685	1580	1148	764	4179	2872	6	31	60	3125	410	6	886	710	2212	376	107
Pelagibacteraceae bacterium GOM-A3	160	62287	10303	24221	3	8412	278	42623	7722	87270	5	309	32464	6235	7486	1	9	29030	11979	6422	32139	92417	11	0	44078	50563	62315	146570	353196	1	44592	17286	10851	104118	66794	45798	374711	142813	4	930	1405	173259	11152	4	8367	6850	28012	10606	3184
Rhizobiales bacterium	160	4954	979	2032	9	2026	64	2069	364	4400	76	103	2429	496	569	5	35	6341	2957	2048	2115	5843	82	7	1752	2127	2568	3651	18052	24	9024	3824	3836	4342	2829	1893	7325	8192	72	90	128	6230	1228	85	3343	2930	17512	495	141
Acidimicrobiaceae bacterium TMED189	159	6041	984	2429	3	43	1	2843	519	5700	19	147	3013	590	670	11	74	193	99	3970	2988	8210	101	9	1085	1359	1647	10019	6147	57	666	285	303	2363	1523	1046	13837	3335	22	71	99	7656	520	17	42	36	137	175	50
Chrysochromulina ericina virus	158	654	106	295	1	314	6	435	72	862	11	183	465	90	119	4	17	939	401	4797	612	1786	9	1	603	742	844	1140	3073	0	1566	592	622	1430	920	635	4013	2076	4	18	24	2898	286	3	682	550	1791	338	94
Sinorhizobium meliloti	158	209	50	83	9	155	1	72	17	159	31	50	110	18	27	5	31	515	232	1082	77	210	39	4	61	91	118	105	702	11	574	242	312	157	114	73	162	333	18	8	18	184	69	28	296	291	2766	26	8
Gammaproteobacteria bacterium TMED257	158	9230	1415	3586	5	871	21	5721	1001	11330	21	114	3453	667	748	5	20	3011	1270	3320	5043	14702	37	3	10525	12199	15119	61113	65284	24	5475	2196	1530	22745	14278	9879	90978	22698	19	85	146	20467	867	16	1133	968	3989	1199	319
Marine Group III euryarchaeote CG-Epi6	158	2777	427	1104	0	225	13	1073	206	2188	0	38	1023	202	243	0	0	764	346	574	820	2473	2	0	976	1173	1502	4761	23949	0	1317	543	899	1660	1112	736	6770	9291	0	30	55	1848	1216	0	238	184	1116	58	16
Candidatus Marinimicrobia bacterium PRS2	156	3994	597	1599	3	53317	1720	1782	338	3579	6	79	2142	382	475	2	9	150680	64755	1520	1592	4834	18	1	807	969	1250	4585	19154	6	222845	90888	166399	1465	968	645	6983	10124	5	107	163	11022	4000	9	78144	65757	448179	46	16
Pelagibacter phage HTVC201P	153	14	3	4	2	4	0	13	0	18	8	53	11	2	2	7	36	15	5	1226	16	41	41	3	8	12	13	15	66	9	36	13	13	31	25	12	24	31	11	0	3	19	3	5	13	3	33	4	0
SAR324 cluster bacterium	153	9085	1534	3616	1	499541	15612	2347	407	4851	2	112	10646	2138	2506	0	4	1276650	558030	1508	4959	13640	10	0	6580	8437	10203	17745	87664	4	2091331	859452	710408	12782	8246	5528	24547	76605	5	297	417	29102	8196	1	830003	712996	2018939	382	103
Podoviridae sp. ctrTa16	152	8	1	6	5	0	0	3	0	4	18	57	5	1	1	5	31	5	2	1603	9	9	41	6	7	6	15	6	46	17	18	4	7	18	14	11	13	35	14	1	1	15	0	11	1	5	5	0	1
SAR86 cluster bacterium SAR86B	152	10141	1652	3966	2	757	14	6782	1209	13941	24	426	26103	5135	6031	4	21	2849	1201	3979	25908	73112	21	4	2781	3213	3856	9462	32602	11	2992	1242	1343	6647	4341	2856	10963	16745	9	49	76	4725	871	14	766	634	2563	805	263
Pelagibacter phage HTVC200P	150	25	3	9	1	6	1	14	4	24	23	62	11	2	1	5	40	17	10	1539	13	51	51	3	11	14	11	27	71	8	27	18	27	22	17	9	19	29	6	2	1	66	3	8	18	11	57	9	2
Cyanophage S-CBP1	150	18	1	3	6	0	0	8	1	18	16	40	7	0	1	1	17	3	0	896	4	14	28	6	1	4	2	4	19	0	0	1	0	8	1	0	7	15	0	1	0	12	4	1	0	0	1	0	0
Klebsiella pneumoniae	149	984	238	378	1	310	8	232	36	554	36	45	426	101	115	10	50	1788	767	1523	325	797	79	13	396	523	630	473	2787	7	1301	589	640	798	584	470	557	1450	13	25	48	423	184	26	710	645	6192	107	33
Salmonella enterica	149	524	106	170	4	303	17	168	30	376	27	54	246	49	60	6	26	1041	450	1478	174	473	58	6	190	260	281	368	1745	14	1171	536	592	434	287	223	611	803	10	23	36	411	170	10	525	484	3591	125	37
Roseobacter phage CRP-7	149	21	3	8	4	0	1	10	1	24	22	57	4	1	0	9	53	3	5	1137	13	26	36	5	2	6	12	8	17	14	41	13	18	23	11	4	10	27	9	1	1	46	7	10	5	2	18	4	2
Gammaproteobacteria bacterium TMED112	149	14595	2410	5728	0	179	10	10207	1773	20557	1	145	9146	1737	2167	0	1	843	375	1363	9099	25916	4	1	2987	3430	4127	30037	34846	0	752	289	396	6961	4540	2977	33369	24110	0	98	149	15437	1526	1	257	199	700	2578	814
SAR86 cluster bacterium SAR86A	147	31243	5159	12395	0	486	7	23475	4198	47098	2	178	18605	3595	4365	0	2	1460	676	1736	18198	51042	4	1	10170	11935	14609	29852	115608	2	1497	647	770	24245	15180	10377	43222	55085	0	228	316	24914	3356	0	549	495	1493	7104	2214
Prochlorococcus sp. HOT208_60m_810P02	146	11373	1822	4362	0	99	1	12232	2172	24821	1	18	708	155	163	0	0	119	35	256	1318	3890	1	0	800	874	1071	105	8830	0	45	14	30	1899	1253	879	1225	5722	0	97	189	3839	3208	0	93	73	304	2186	653
Synechococcus phage ACG-2014g	146	166	27	79	3	8	0	84	12	148	15	125	42	4	6	2	13	16	8	3313	85	183	25	1	31	40	53	46	147	7	22	11	14	84	51	47	81	117	8	8	14	146	14	5	8	9	52	9	1
Candidatus Cloacimonetes bacterium	145	876	159	336	6	1144	38	404	62	912	22	70	437	94	102	5	24	3621	1513	1576	459	1233	30	5	288	350	455	900	3605	12	4344	1675	2674	632	407	296	1632	1863	9	24	39	1265	381	11	1408	1211	6695	71	16
Pelagivirus S35C6	145	12	0	6	2	2	1	5	1	18	13	56	8	0	2	8	42	20	7	1280	10	52	54	1	12	15	11	11	46	15	53	19	21	24	16	12	34	28	8	1	0	15	1	7	19	13	56	1	1
Candidatus Pelagibacter giovannonii	145	8162	1284	3147	0	5197	170	5880	1049	11908	9	112	5131	963	1216	5	25	16682	7023	2379	5658	16208	28	3	6011	6833	8547	15589	47248	12	33618	13144	7955	14713	9451	6290	43638	18206	10	81	149	16799	1399	9	6147	4957	20234	839	253
Sphingomonas sp. SKA58	143	7	1	1	0	4603	137	6	0	5	3	64	1639	373	385	2	13	12487	6453	25	4	6	6	1	3	4	1	248	1698	0	363	259	6783	9	9	4	59	1325	1	196	250	4582	1171	79	10052	9887	195614	226	54
Synechococcus virus ACG2014bSyn7803C61	143	140	19	50	5	4	0	77	11	161	20	93	34	4	10	8	22	24	9	2993	70	194	32	3	35	52	70	46	114	9	46	14	16	114	56	48	82	103	13	5	4	129	14	4	15	11	51	6	8
Desulfovibrio oxyclinae	142	38	12	18	4	36	1	26	2	38	13	39	23	9	5	4	23	139	56	839	20	70	37	1	24	15	25	48	167	13	158	74	78	44	25	19	78	75	3	1	7	68	18	7	54	62	231	9	1
Candidatus Lokiarchaeota archaeon	141	701	145	281	2	527	14	282	45	652	20	69	346	59	78	1	21	1780	748	2193	341	937	24	4	258	332	383	546	2258	20	2117	880	1084	580	373	311	1224	1170	7	25	27	912	205	8	796	678	3227	83	18
Alphaproteobacteria bacterium TMED199	140	16185	2687	6394	0	319	13	11867	2073	24476	1	122	11582	2188	2775	0	5	1076	440	1235	11268	32360	5	0	5146	6094	7435	2208	58406	2	718	269	341	16706	10645	7097	12197	30812	0	233	368	6537	5905	2	519	426	1382	7077	2147
Vibrio parahaemolyticus	139	1352	248	506	1	458	13	455	73	991	24	62	630	147	150	4	32	1838	791	1775	539	1383	54	8	540	653	763	1156	4096	4	2328	1078	928	1148	716	554	1271	2298	10	36	46	1044	265	9	849	771	8966	127	38
Hymenobacter sp.	138	155	31	66	2	74	3	61	11	122	11	75	72	16	19	0	8	291	111	1514	89	221	16	5	69	75	111	93	583	2	377	173	192	201	101	74	186	402	2	5	13	119	35	4	140	127	718	26	9
Synechococcus sp. A15-24	138	1238	268	490	1	32	1	325	56	807	5	9	560	124	115	0	0	105	40	163	155	371	2	0	468	649	712	104	3027	0	107	45	47	1491	1036	714	81	3165	0	15	15	132	164	1	37	31	138	62	21
Synechococcus phage ACG-2014j	137	326	49	157	5	6	0	133	23	263	11	103	68	13	11	5	18	18	6	3100	90	271	21	2	33	49	51	49	170	2	10	5	2	84	44	35	48	115	8	2	10	88	12	2	8	1	15	23	6
Dishui Lake phycodnavirus 2	136	1066	177	411	3	11	0	294	66	555	9	369	311	72	86	5	35	74	38	9402	766	2174	23	2	20	38	36	24	118	1	59	23	22	54	36	22	156	107	3	2	3	102	10	2	28	24	74	6	1
uncultured Rhizobium sp. HF0500_35F13	135	23	6	14	7	22	1	10	1	17	32	36	11	1	5	3	29	89	43	1053	7	19	44	2	6	8	8	7	51	16	232	98	156	22	4	8	9	31	10	0	7	27	35	19	40	43	258	2	3
Prochlorococcus sp. HOT208_60m_813B04	135	9199	1519	3582	1	73	3	10206	1817	20598	1	17	623	123	152	0	1	118	48	289	1083	3249	3	0	646	792	883	74	6915	0	46	16	28	1519	1034	672	971	4615	1	100	185	3282	2727	3	86	77	258	1807	520
Rickettsiales bacterium	134	728	132	305	0	373	11	330	59	650	11	46	401	63	79	4	17	1330	574	1214	362	1017	19	2	383	489	568	512	3011	6	1317	538	543	984	591	424	1167	1522	10	21	28	694	180	10	478	397	2076	100	31
Flavobacteriaceae bacterium TMED184	133	6867	1151	2737	1	1062	40	3283	588	6691	3	91	5505	1042	1305	1	5	4025	1733	3695	3876	11046	3	2	2854	3411	4048	20510	51857	5	6153	2466	3404	6262	3979	2707	37846	20818	3	56	91	7644	1396	1	1082	872	3717	143	50
Desulfobacteraceae bacterium	132	1432	273	597	5	2100	70	622	118	1210	10	71	857	165	197	2	32	6779	3059	1662	658	1776	24	2	471	617	728	1354	5605	8	7840	3429	3958	1090	699	558	2277	2886	8	41	48	1931	576	9	3195	2741	13725	123	35
Rhizobium leguminosarum	132	544	121	209	11	340	9	212	39	437	27	58	285	45	70	9	41	1245	529	1436	226	590	62	3	180	229	256	300	1968	19	1461	611	691	429	287	202	556	873	20	7	16	427	123	41	625	567	5741	71	12
Stenotrophomonas phage vB_SmaS-DLP_6	132	118	16	31	5	37	1	45	10	75	17	100	31	6	7	5	20	143	60	2659	59	160	38	4	32	44	44	45	100	8	202	95	85	59	45	29	71	75	12	5	6	152	13	7	108	96	279	18	7
Synechococcus virus P60	131	30	6	13	4	1	0	8	3	16	15	35	9	0	2	3	28	8	4	790	8	31	32	3	14	22	29	21	71	2	15	9	6	19	13	19	15	39	4	0	0	6	2	3	1	3	8	1	0
Pseudomonas pachastrellae	131	27	8	13	39	223	1	3	0	8	68	48	1762	376	440	85	444	302	153	327	2	13	3978	421	305	372	364	13141	32270	78	4849	3121	39143	953	666	808	4256	14039	79	814	1025	3551	6860	43	61133	59684	709475	472	106
Synechococcus virus Syn5	131	37	8	14	1	0	0	8	4	36	21	47	10	4	0	2	40	8	2	1120	6	19	45	3	23	22	50	21	131	4	10	4	7	59	33	24	12	66	6	0	0	12	1	2	1	2	2	0	0
Pelagibacter phage Lederberg EXVC029P	130	15	1	4	10	2	0	9	3	20	29	58	7	2	2	6	50	20	9	1493	14	36	71	11	11	18	15	13	59	40	27	10	7	30	25	20	29	36	28	2	3	25	5	24	5	3	12	3	1
Bartonella queenslandensis	130	18	1	9	2	10	0	6	3	5	12	20	7	0	1	0	9	23	8	494	9	19	15	0	7	3	7	7	39	1	19	5	7	8	10	6	22	17	2	1	0	11	3	2	3	4	31	2	0
Acidimicrobiaceae bacterium TMED130	129	46378	7698	18333	0	702	20	13523	2360	28050	1	253	12045	2398	2910	0	4	2694	1397	2442	10969	29918	5	1	2911	3897	4825	28651	58475	2	4531	2066	2111	5111	3227	2243	34733	26886	0	474	718	68999	6230	3	1006	964	3664	226	78
Candidatus Rokubacteria bacterium	129	2866	631	1179	4	5480	151	747	123	1638	23	45	1369	296	306	4	20	16460	7811	1255	939	2463	45	8	667	911	1054	1441	8315	9	19272	8485	10263	1574	964	806	2106	3952	12	91	156	3814	1587	18	9679	9387	44611	210	57
Synechococcus elongatus	129	50	20	27	0	25	3	31	6	64	16	39	28	9	8	1	13	79	37	704	21	53	9	0	41	65	41	22	293	0	104	42	42	91	61	52	34	209	3	3	6	34	35	13	59	33	162	8	4
bacterium TMED6	128	6493	1076	2667	1	3660	96	3709	662	7551	3	78	3004	557	692	1	3	11977	5240	1365	3843	11323	4	0	1866	2127	2590	7509	43833	2	18091	7012	12379	3151	2057	1339	14585	20413	3	146	213	8859	3415	1	3833	3063	19483	142	44
Acinetobacter baylyi	128	28	12	15	12	9	0	11	5	40	24	31	24	4	7	5	52	499	207	1116	16	61	50	7	10	18	11	41	111	10	664	295	50	29	27	13	37	55	18	16	32	49	10	13	196	185	189	6	2
Rhizobiales bacterium TMED143	127	534	98	185	6	103	2	210	43	452	9	87	243	46	61	6	20	388	181	2131	239	615	31	1	155	164	199	342	1427	13	672	247	266	372	223	169	509	731	11	10	8	465	66	6	204	177	711	82	19
Marinilabiliales bacterium	126	1319	221	533	3	929	21	810	141	1680	17	58	854	137	194	1	22	3195	1382	1500	845	2359	24	3	733	873	1046	975	7755	9	4507	1772	2677	1573	1001	672	2284	4962	14	30	36	1154	442	9	1525	1261	6521	204	62
Microbacterium sp.	124	45	6	18	0	1541	36	18	4	32	4	28	314	68	66	0	2	5203	2837	67	17	63	3	0	24	23	20	37	179	0	225	113	105	24	14	16	65	71	0	75	89	227	123	47	1617	1579	16350	68	23
Candidatus Dadabacteria bacterium	123	9865	1681	3781	5	1307	37	4272	757	8769	18	118	7862	1535	1743	3	12	4364	1968	1791	6673	19038	28	1	5576	6387	7930	26903	55099	7	5207	2205	2631	12670	8083	5703	52585	21134	8	297	415	79890	6340	10	1894	1753	8851	513	134
Rhodobacteraceae bacterium TMED160	123	12569	2043	4951	2	206	3	4355	773	8995	7	100	7879	1564	1792	2	7	753	345	1021	4577	12515	20	1	4785	6057	7410	4470	59390	2	899	370	386	13343	8482	5778	9466	26820	2	73	105	2145	1288	1	199	166	749	372	107
Hyperionvirus sp.	123	142	28	46	2	36	1	52	15	116	11	61	53	14	12	7	17	170	84	1672	65	222	17	1	67	86	105	29	340	7	200	85	100	132	101	83	171	195	3	2	8	189	35	8	91	73	268	13	4
Cyanophage S-RIM4	122	113	17	55	2	1	0	54	3	88	13	82	31	4	13	1	10	20	8	2569	53	128	18	2	24	43	37	25	65	3	22	6	11	59	36	27	48	57	1	4	12	82	5	5	9	9	22	9	3
Spirochaetes bacterium GWD1_27_9	122	36	6	15	6	13	0	7	4	12	6	59	10	3	1	3	14	40	16	1479	12	39	16	2	7	7	11	2	51	6	72	23	35	18	11	13	20	25	2	2	1	38	7	2	26	19	73	1	0
Cyanophage S-CBP3	121	14	3	2	5	1	0	5	1	14	7	19	2	0	2	4	20	0	0	684	0	4	37	1	1	0	2	0	4	0	1	1	0	1	1	2	1	3	0	0	0	13	4	1	0	0	1	0	0
uncultured Mediterranean phage uvDeep-CGR2-KM19-C184	121	22	3	9	1	1	0	6	2	17	15	50	7	1	1	2	30	6	2	1418	4	12	56	3	13	22	16	7	48	31	27	6	7	22	23	5	12	39	14	1	0	15	1	7	3	4	17	4	2
Pelagibacteraceae bacterium TMED267	119	11557	1961	4445	3	2480	77	8146	1527	16455	10	147	6933	1357	1603	1	7	8020	3401	3010	7721	22139	24	1	7427	8625	10486	20405	62688	6	13072	5115	3437	18227	11550	8072	55850	27577	6	138	198	21428	1809	8	2614	2232	9320	1354	372
Bodo saltans virus	119	1778	432	666	0	74	5	396	81	962	5	30	485	95	101	2	5	221	104	641	590	1556	3	2	592	691	886	92	2614	5	259	115	118	1165	753	563	309	1934	4	32	45	547	199	1	126	123	389	27	13
Pelagibacter phage HTVC105P	119	12	1	6	2	9	0	8	2	13	13	44	5	0	2	4	27	50	13	1005	5	30	32	2	8	12	15	13	45	11	87	36	36	21	12	13	20	16	9	1	3	27	0	8	55	40	140	5	1
Bacillus cereus	119	589	106	236	5	175	7	216	25	453	10	50	260	45	60	6	17	648	283	1696	231	607	30	4	207	228	262	435	1610	11	796	341	358	439	292	214	674	803	4	12	22	490	89	10	288	263	1263	66	13
Candidatus Woesebacteria bacterium GW2011_GWB1_39_12	119	84	9	30	8	17	2	15	5	41	39	76	16	8	1	5	30	68	25	1800	29	96	84	4	26	39	28	29	91	31	82	37	50	51	31	24	71	64	15	2	2	119	8	29	67	44	168	9	1
Caudovirales sp. ctOwN3	118	52	6	12	4	4	0	10	1	26	18	46	10	2	1	3	23	16	8	998	11	18	25	2	7	4	7	8	23	11	31	9	8	22	16	11	13	17	9	0	2	32	2	6	8	8	21	4	1
Methylotenera sp.	118	144	24	64	5	77	3	51	8	128	14	52	73	13	15	9	19	265	113	1323	59	152	31	5	94	122	137	339	767	13	424	182	198	268	180	128	486	352	6	6	8	181	44	11	158	135	1169	31	6
Clostridium botulinum	118	423	89	196	1	234	10	163	31	361	12	26	190	43	33	3	12	705	315	945	153	459	19	3	136	182	228	374	1342	4	1182	464	417	387	237	166	581	620	5	8	15	520	74	7	347	297	1165	53	12
Gammaproteobacteria bacterium TMED234	118	11450	1764	4484	1	301	6	8316	1434	16454	14	290	7178	1321	1626	18	104	1153	470	4547	6897	19887	75	8	7322	8750	10661	26017	77817	13	1337	555	643	17253	11171	7620	35588	37186	26	88	136	8924	1317	11	315	287	1117	1015	286
candidate division Zixibacteria bacterium RBG_16_53_22	118	132	33	56	10	153	12	62	13	81	27	38	66	14	19	2	17	525	245	741	54	166	20	3	36	58	66	139	509	20	702	300	417	99	68	45	231	268	3	3	7	212	58	15	266	234	1150	6	4
Prochlorococcus T7-like virus P-TIP39	116	7	0	4	1	0	0	0	0	7	12	19	1	0	0	1	8	2	1	443	4	6	18	0	0	0	1	0	0	0	0	0	1	0	1	0	0	0	0	1	1	14	4	2	0	2	0	6	1
Betaproteobacteria bacterium	116	2968	602	1183	4	3328	101	907	168	1994	40	61	1530	332	386	4	33	11051	5163	1608	1144	2926	97	8	948	1103	1333	2259	10233	7	14961	6195	7183	2174	1379	1080	3276	4875	29	77	111	2531	1225	24	5516	4953	27371	218	66
uncultured Mediterranean phage uvDeep-CGR2-KM21-C368	116	27	5	6	3	17	1	10	2	16	10	39	4	1	2	3	12	90	35	992	9	28	38	1	16	28	25	36	42	7	62	14	16	65	45	19	52	39	5	0	4	56	6	7	17	20	63	3	2
Rhodobacterales bacterium	116	21543	3618	8491	3	1508	55	13977	2493	28781	105	255	30061	5834	7106	3	19	4130	1748	1993	10635	30522	30	6	8395	9545	11958	2272	87626	1	3886	1644	1615	24424	15662	10560	7483	30891	10	318	535	6762	9568	15	1362	1164	7505	5398	1592
Gammaproteobacteria bacterium TMED243	116	2854	461	1121	0	389	8	682	134	1529	2	17	946	219	229	1	8	1530	661	227	661	1806	14	0	326	428	537	649	4914	31	2723	1197	1111	787	545	362	909	2306	3	50	53	1003	474	3	658	617	2742	419	115
Candidatus Pelagibacter sp. HIMB1321	115	24325	4027	9622	1	6570	220	17534	3149	35905	7	212	16032	3115	3845	0	6	21427	8843	5856	18212	53064	16	1	16238	18943	23161	40423	122711	4	37567	14721	9119	40260	25769	17809	118991	48303	8	255	387	46727	3759	6	7468	5907	24774	2554	723
Podoviridae sp. ct2cs2	115	14	2	3	1	2	0	3	1	8	17	57	2	0	2	5	29	17	6	1142	6	14	43	6	1	4	12	7	40	12	30	15	11	12	9	4	10	21	9	3	1	37	2	12	9	13	33	2	3
uncultured Mediterranean phage uvDeep-CGR2-AD12-C183	115	2	0	3	16	5	0	0	0	1	12	39	1	0	0	6	45	25	12	824	2	7	39	4	6	9	11	4	38	19	49	14	10	14	10	5	4	11	13	0	2	3	1	15	13	6	41	0	0
Aphanizomenon flos-aquae	115	90	22	50	3	48	0	25	6	70	10	50	33	5	4	3	24	231	108	1324	26	63	22	4	33	51	41	26	230	15	155	79	69	57	48	28	35	84	5	4	10	67	21	7	89	78	210	20	1
Prochlorococcus sp. HOT208_60m_805A16	114	7458	1178	2962	1	71	1	8161	1477	16501	0	13	544	118	133	1	1	111	40	198	888	2604	1	0	471	529	689	76	4955	0	53	21	36	1109	760	522	701	3340	0	88	122	2617	2082	0	74	49	258	1411	398
Candidatus Dojkabacteria bacterium	114	57	2	10	2	32	0	15	3	38	15	66	23	2	3	5	38	125	36	1585	23	54	48	6	17	16	42	20	131	12	157	58	82	56	33	26	56	87	8	2	3	71	15	16	47	43	231	3	0
Prochlorococcus sp. MIT 0601	114	773	145	285	4	47	1	561	99	1168	14	49	185	44	48	3	8	190	97	1426	121	368	13	0	622	784	1012	164	5794	1	389	149	159	1507	955	696	614	3412	4	215	331	771	4883	2	99	81	412	71	29
Patescibacteria group bacterium	114	277	55	119	6	313	6	119	20	238	16	49	174	43	42	1	25	979	456	1330	126	396	21	3	104	117	164	238	985	10	1099	424	567	226	157	115	442	528	4	7	11	421	100	13	360	348	1622	25	10
Euryarchaeota archaeon TMED173	113	9411	1726	3749	0	154	6	2183	378	4770	0	79	2355	456	578	0	1	606	302	1395	1854	4544	4	1	498	676	868	2104	11249	0	1225	574	627	959	632	408	2125	4929	0	80	131	1503	773	0	126	93	451	57	22
Pyramidobacter piscolens	113	43	3	16	2	15	0	18	0	36	7	23	8	0	0	1	16	44	16	557	15	36	20	3	1	4	6	9	36	5	62	25	24	9	3	3	13	20	2	3	2	26	7	6	22	15	68	4	2
Thermoprotei archaeon	112	498	98	197	4	596	21	159	31	385	15	47	250	48	52	2	17	1798	785	1535	190	543	35	3	223	267	302	425	1637	15	1890	778	852	429	301	213	632	829	6	19	25	630	155	5	943	812	3442	39	9
Prochlorococcus phage P-SSM5	112	67	7	38	0	2	0	35	5	70	16	59	9	1	1	0	12	6	2	1616	33	87	13	1	334	461	512	319	2833	20	6	3	3	862	580	366	452	1551	26	3	1	73	6	6	1	2	4	7	1
Thermoplasmata archaeon M11B2D	111	88	12	31	2	29	0	43	3	79	14	73	18	7	4	1	13	96	42	1756	28	96	30	2	29	35	41	14	75	13	278	105	116	80	45	25	70	76	6	6	5	87	6	9	90	89	239	10	4
Winogradskyella sp.	109	874	167	330	0	66	2	364	71	731	9	154	293	41	80	1	16	269	125	4528	647	1674	19	0	97	111	149	152	1072	0	634	251	145	304	187	131	326	751	2	1	8	165	56	0	206	162	2683	21	7
Nitrospirae bacterium	108	1475	269	583	4	2838	84	573	105	1225	26	58	856	168	197	1	16	11516	5217	1349	664	1819	24	5	515	604	719	1169	5507	16	10256	4320	4885	1176	732	554	2251	2675	9	37	65	2088	645	15	3730	3312	16510	131	34
Acinetobacter sp.	108	95	19	22	5	83	4	56	6	134	7	34	39	4	7	2	16	251	103	751	54	135	17	1	97	79	89	75	389	8	298	121	107	144	90	62	106	140	4	1	7	105	39	11	120	103	346	72	21
Gemmatimonadetes bacterium	108	3274	694	1352	1	5654	167	615	112	1421	27	66	1252	270	296	2	30	19181	9147	1300	851	2167	48	5	549	651	702	1382	7359	4	24759	10765	12458	1096	760	573	2274	3889	15	67	117	3444	1151	14	9929	9408	38886	131	21
Endozoicomonas ascidiicola	107	169	30	72	4	93	3	53	5	122	12	34	74	24	19	2	18	287	117	729	64	197	26	1	65	81	108	133	674	0	398	163	176	152	96	64	196	253	1	2	6	131	38	4	142	122	562	25	3
Pseudomonas syringae	107	424	108	170	4	149	3	85	14	224	28	31	132	19	28	13	46	527	267	880	123	323	88	10	180	200	251	271	1512	24	712	337	656	443	291	215	281	558	14	15	17	219	105	19	482	434	4234	81	24
Sieqvirus S42C7	106	17	0	12	0	3	1	5	1	13	1	34	3	0	0	2	28	10	3	729	5	15	28	1	4	7	10	13	47	11	8	6	1	16	15	9	22	15	0	1	0	11	3	5	2	3	4	2	0
Synechococcus T7-like virus 7E	105	11	3	7	0	0	0	7	3	6	5	6	1	0	0	1	1	0	2	151	0	0	6	0	0	0	0	0	1	0	0	0	0	0	1	0	0	1	0	0	0	1	1	0	0	0	0	0	0
Candidatus Synechococcus spongiarum	105	529	117	218	4	136	2	246	32	475	19	48	206	55	49	1	12	426	225	1404	122	298	17	2	211	339	370	99	2015	5	458	187	244	769	442	327	201	1334	6	18	40	264	490	13	213	202	936	46	20
Pelagibacter phage HTVC204P	105	4	0	4	3	0	0	4	2	11	13	32	1	1	0	2	29	14	3	842	8	19	31	3	4	7	4	8	32	5	23	7	11	23	9	4	12	10	5	0	4	22	5	10	5	3	26	2	0
Gammaproteobacteria bacterium TMED139	104	26598	4461	10670	0	1359	38	6617	1087	13290	4	96	12037	2341	2771	2	14	5667	2660	1152	8482	22900	18	5	6814	9021	10932	8721	130208	1	11169	4748	5660	18927	12233	8350	14367	75359	4	535	905	11953	9453	3	2275	2111	10285	151	50
Desulfobacter vibrioformis	104	119	19	36	1	55	0	36	12	104	14	50	25	5	6	1	13	197	76	1159	49	102	15	1	33	39	62	65	253	7	274	118	110	84	55	26	124	140	10	1	6	93	16	3	93	96	405	15	3
Methylophilales phage Venkman EXVC282S	104	17	4	2	5	11	0	6	0	12	14	26	4	2	0	6	27	20	8	972	5	22	38	2	7	18	11	15	43	24	38	24	32	23	19	8	15	17	10	0	0	20	2	4	12	4	47	5	2
Candidatus Actinomarina minuta	104	66542	10800	26253	0	387	13	31816	5578	63168	1	527	32322	6171	7680	3	3	1164	510	12726	29806	85710	9	2	9874	11981	14607	91551	56200	0	484	224	257	21648	13584	9331	117438	30101	1	391	637	78693	1855	0	250	217	546	2492	765
Pelagibacter phage HTVC100P	104	7	2	5	4	1	0	7	0	5	17	38	6	1	1	4	18	6	7	842	6	12	36	2	8	7	16	12	30	16	17	5	6	8	6	3	7	19	10	2	3	16	0	12	3	5	19	0	1
Synechococcus phage S-LBS1	103	16	3	4	2	0	0	0	1	6	9	35	5	1	0	2	21	3	1	767	2	6	23	2	3	5	7	5	12	4	1	0	0	4	5	6	4	7	3	1	0	12	1	5	0	2	2	3	2
Rickettsiales bacterium TMED289	103	18640	3089	7310	1	2745	81	12829	2399	26478	2	158	8716	1656	2064	0	2	9356	4011	2603	9856	28659	8	0	6260	7359	8983	27959	62528	1	15148	5809	4021	14554	9262	6573	51792	28844	0	222	376	34240	3214	4	2993	2418	9844	2720	825
Alphaproteobacteria bacterium TMED54	103	9109	1558	3676	0	481	19	6192	1113	12977	4	51	5980	1095	1402	0	1	1670	721	708	5756	16473	2	0	5122	5727	7120	2462	58070	1	1914	801	815	15109	9595	6592	11692	27574	0	110	175	4342	3156	1	680	600	2492	4106	1197
uncultured Mediterranean phage uvDeep-CGR2-AD7-C12	103	47	10	25	0	33	0	5	1	10	11	48	28	5	4	4	39	169	100	1144	12	52	38	3	13	12	12	19	49	30	471	188	208	37	15	12	27	33	11	4	7	142	58	38	90	102	259	0	0
Pelagibacter phage HTVC022P	102	16	1	9	4	4	0	12	0	17	11	47	6	1	1	8	29	17	12	1060	11	28	35	4	7	10	13	19	66	9	30	11	15	26	15	9	33	28	9	0	1	21	2	8	12	4	28	4	1
Alteromonas mediterranea	102	625	112	236	0	1363	31	59	7	132	8	29	275	63	59	2	16	5360	2290	608	66	182	15	0	975	1236	1579	5996	4204	4	6183	4012	393	1714	1055	742	3503	3850	5	250	337	964	2437	5	5097	4407	148927	63	13
Pelagibacter virus HTVC011P	100	26	2	14	3	40	2	20	3	32	6	41	17	1	1	8	33	119	58	920	19	44	31	2	15	25	30	37	144	12	184	73	55	76	40	22	100	72	5	5	7	78	10	15	66	66	225	17	4
Prochlorococcus T7-like virus P-RSP1	99	6	0	5	2	0	0	3	0	6	5	17	1	0	0	5	8	0	1	401	5	9	20	1	1	2	3	1	6	0	0	0	0	5	2	1	1	3	0	0	0	6	0	2	0	1	1	0	0
Mimiviridae sp. ChoanoV1	99	1732	281	705	0	580	19	1149	169	2282	2	113	801	140	199	0	4	1651	694	2638	1825	5467	5	0	519	615	734	688	3964	5	2313	952	848	1423	947	674	4864	2954	3	35	51	3321	580	2	1093	868	2873	202	73
Micavibrio aeruginosavorus	99	1340	259	587	2	734	21	593	110	1143	22	62	906	178	231	2	17	2589	1230	1139	611	1619	32	2	504	538	666	921	4684	6	2224	947	955	1196	763	512	1936	2136	9	31	39	1352	369	9	1115	896	4193	168	25
Alphaproteobacteria bacterium MarineAlpha3_Bin7	99	30238	5109	12025	2	2480	71	7279	1273	14963	5	71	9583	1903	2271	2	0	8839	3955	814	8147	22048	3	0	11104	13621	16700	6238	169337	1	11340	4840	5815	30274	19320	13348	25361	83878	6	338	504	4582	13535	5	3839	3395	18078	188	63
Prochlorococcus sp. HOT212_60m_824E10	99	5618	918	2270	0	65	2	6056	1108	12690	1	17	404	70	98	0	1	136	66	202	691	2014	7	0	395	533	638	82	4917	1	98	45	40	1066	747	508	768	3291	0	62	85	1752	1412	0	81	59	239	887	282
Flavobacterium sp.	99	670	115	276	8	379	11	398	89	800	19	54	526	92	107	4	18	1607	711	1481	352	1059	67	6	334	415	519	500	3532	10	1658	658	872	803	580	364	1212	2353	14	12	21	580	277	9	623	516	11410	103	32
alpha proteobacterium HIMB59	98	25659	4329	10009	1	2010	79	16864	3019	34316	7	191	26945	5192	6339	1	2	6974	3049	2847	20701	58807	10	0	5875	6756	8555	18141	61192	0	8421	3382	3048	15241	9798	6616	48352	22382	0	150	282	42677	2787	5	2215	1795	7166	3539	1047
Helicobacter pylori	98	498	84	180	1	263	8	275	47	554	7	35	278	57	66	2	3	874	412	732	246	751	15	1	284	320	398	592	1953	6	1166	475	486	675	415	277	1035	826	3	20	27	717	133	2	373	321	1190	111	28
Sorangium cellulosum	98	1153	314	510	3	933	25	284	43	643	9	41	598	114	135	1	17	3110	1499	1086	373	896	31	4	293	307	350	338	2633	3	3508	1636	1974	519	340	321	479	1411	12	43	77	543	302	8	1389	1408	7249	110	24
Pelagibacter phage HTVC021P	98	9	1	5	1	2	0	5	1	15	7	56	0	0	0	3	27	6	2	1240	19	41	55	2	3	0	9	5	19	4	5	2	2	9	5	5	12	10	2	0	0	8	1	8	0	1	10	1	1
Candidatus Accumulibacter sp. SK-01	98	33	6	13	2	25	1	7	0	20	16	39	12	0	4	6	17	92	48	866	7	29	33	5	10	10	13	18	65	16	87	47	41	14	18	6	27	42	11	1	3	18	7	13	58	48	221	7	1
uncultured phage MedDCM-OCT-S08-C304	97	19	4	8	4	0	0	11	3	11	7	26	1	1	2	0	16	1	0	589	5	9	17	2	5	1	4	1	27	1	0	0	1	6	4	4	5	12	0	1	1	13	1	2	0	0	0	2	1
Cryomorphaceae bacterium A20-9	97	206	31	88	1	293	5	138	16	249	2	35	379	68	80	0	2	1336	597	159	138	436	23	1	138	149	183	138	1410	2	713	305	305	430	276	193	226	2499	8	58	75	331	447	2	1246	1077	21857	120	39
Flavobacteriaceae bacterium TMED200	97	2285	371	909	0	213	13	1511	245	2970	1	60	2039	394	505	0	2	710	295	3537	1377	3776	6	0	668	755	927	2171	8979	1	983	371	368	1584	1057	674	4829	3621	1	17	23	1997	349	0	235	184	793	161	41
Candidatus Thioglobus singularis	95	739	127	292	3	23278	690	418	81	864	11	46	1870	366	515	1	14	89074	38616	1201	806	2454	7	2	2438	2974	3648	2470	28337	1	277084	109469	101062	5447	3595	2318	9080	14754	1	18	17	913	122	1	27893	23399	103107	52	21
Pelagibacter virus HTVC019P	94	14	1	2	4	6	0	8	4	5	9	37	2	0	1	7	33	8	6	966	3	23	29	3	14	9	18	11	56	19	32	8	9	24	16	13	23	27	15	1	2	22	1	4	11	5	28	5	0
Candidatus Poribacteria bacterium	94	2773	534	1111	1	11457	340	687	113	1430	9	50	1433	285	363	2	10	36243	17108	1071	957	2462	15	1	505	613	745	1392	7370	3	44163	19034	19110	1080	679	551	2083	3782	5	122	203	2845	2078	5	21811	19603	68566	139	39
Rhizobiales bacterium TMED168	94	11763	1912	4530	0	340	9	7465	1289	15007	1	70	7199	1370	1658	0	0	1227	521	690	7631	22207	0	0	7038	8903	10713	19210	59327	0	1709	742	657	17279	10940	7419	19279	25856	0	85	116	9996	1492	0	350	277	1292	274	77
bacterium TMED80	94	10809	1766	4210	1	1445	29	6289	1125	12454	0	157	9675	1838	2203	1	6	5362	2363	1759	10437	29585	17	2	1392	1716	2109	15691	29330	4	6471	2590	3650	3164	2012	1328	23922	17499	1	102	156	4917	1350	1	1528	1325	6499	253	81
Amoebophilaceae bacterium TMED152	93	11296	1952	4549	0	326	12	7575	1359	15123	1	87	5243	1021	1228	0	1	1396	594	1007	5742	16424	4	2	2776	3272	3907	23779	34958	0	1902	696	954	5861	3696	2447	34503	18022	0	59	110	13859	1111	0	302	282	1000	571	163
candidate division KSB1 bacterium	93	1488	259	609	4	2418	99	629	112	1298	16	53	746	140	184	0	7	8049	3614	1158	690	1898	13	2	394	507	588	1776	6188	8	9311	3897	5668	795	526	410	2829	3254	6	47	72	2312	665	6	3285	2832	14739	98	24
Euryarchaeota archaeon TMED279	92	3967	690	1514	0	116	4	1274	203	2646	0	45	1358	299	369	0	0	402	204	964	861	2345	5	1	6700	8902	10755	8880	174133	0	743	309	998	11267	7209	4818	15794	85966	0	20	47	679	215	0	94	92	578	29	10
Microbacterium sp. 67-17	92	4	1	2	0	979	23	2	0	5	1	19	202	56	52	1	0	2952	1719	15	2	5	4	0	0	0	1	1	11	2	99	46	52	1	0	0	1	7	0	13	24	88	56	6	599	614	5730	26	4
uncultured phage MedDCM-OCT-S08-C964	92	92	18	39	3	7	0	39	4	62	9	64	9	0	2	2	15	22	7	1570	21	99	17	2	18	26	32	50	82	1	35	7	5	51	29	16	51	58	4	1	3	64	6	6	7	12	48	4	1
Pelagibacter phage Greip EXVC021P	92	9	1	4	3	8	0	5	0	11	12	37	4	0	0	3	23	38	15	760	6	16	21	4	14	10	19	16	33	16	43	27	26	31	8	10	20	25	14	1	0	15	1	8	34	19	79	6	0
Synechococcus T7-like virus oc41	91	4	1	3	1	0	0	2	0	2	14	14	0	0	0	2	7	2	0	211	2	0	9	3	0	0	0	0	0	0	0	0	0	0	0	0	0	0	0	0	0	12	1	0	0	0	0	2	0
Rickettsiales bacterium TMED174	91	13328	2114	5285	0	2931	103	7714	1417	15706	6	146	8312	1597	1950	2	6	9106	3758	3457	9145	26020	16	0	4690	5193	6586	11757	34256	2	10890	4269	3206	10836	6871	4733	28073	13106	1	194	335	27146	2195	4	3064	2541	11591	1771	548
bacterium TMED178	91	205	40	83	3	38	2	90	18	158	15	47	61	16	24	3	9	176	66	1328	109	320	16	0	207	253	291	306	1680	4	214	87	88	496	305	220	3007	1163	6	6	9	625	76	4	74	76	316	61	12
Desulfovibrio sp. 6_1_46AFAA	91	17	1	4	0	29	3	6	4	16	16	23	8	2	3	3	13	71	37	566	7	21	26	2	1	5	6	17	45	4	146	47	41	12	12	8	20	30	2	1	2	18	1	4	53	47	129	2	2
Synechococcus T7-like virus oc6d	91	15	1	4	4	0	0	7	3	5	9	7	1	0	1	1	6	1	0	257	0	4	12	1	3	2	6	6	20	5	0	0	0	8	7	0	4	18	1	1	0	13	1	3	0	0	0	1	0
Flammeovirgaceae bacterium TMED262	90	2600	483	1091	6	247	7	1715	300	3581	15	52	1113	226	272	4	23	1224	500	1014	1414	3969	21	3	1065	1172	1467	9450	16302	17	1391	525	977	2102	1347	895	22848	12169	6	39	49	5193	465	8	192	179	707	216	65
Cyanobium sp.	90	567	155	207	1	69	1	294	55	620	19	54	305	75	77	2	15	187	102	1354	115	275	19	2	357	425	505	96	2905	4	240	96	130	856	519	437	234	2244	7	57	80	288	1059	9	104	104	362	72	13
Synechococcus virus SCBP42	90	18	0	6	2	0	0	7	0	7	11	28	1	1	1	3	14	0	0	497	8	15	17	1	7	28	24	16	86	8	7	3	0	27	15	16	10	37	4	0	3	15	1	6	0	0	2	2	0
Candidatus Woesearchaeota archaeon	89	374	68	154	2	589	14	133	27	311	9	49	175	35	58	5	22	1689	714	1096	173	481	26	4	130	163	201	311	1313	3	1621	653	816	291	191	166	655	684	3	6	10	468	111	3	810	709	2795	48	14
Marinicaulis flavus	89	2441	772	1033	1	232	4	326	53	935	25	2	212	39	49	1	3	648	274	306	486	1165	11	0	154	188	239	396	1679	0	620	296	304	364	197	171	561	782	6	13	15	480	97	9	361	389	2224	58	8
candidate division Zixibacteria bacterium	89	969	165	356	4	1474	47	398	77	847	5	46	491	109	120	0	12	4670	2143	960	451	1285	21	1	285	333	395	980	3717	7	5606	2354	3451	579	341	279	1797	2013	3	31	54	1539	470	7	1966	1740	9175	68	13
alpha proteobacterium MED-G09	89	8662	1386	3409	0	317	9	5232	996	10640	1	53	5156	1001	1152	0	0	1227	470	538	5463	15642	2	0	4915	5714	7038	13755	40191	0	1880	734	726	11435	7317	5070	13505	17427	0	73	88	8560	1278	0	358	306	1342	147	33
Candidatus Pelagibacter sp. TMED153	89	16682	2838	6470	0	2863	83	10193	1891	20377	0	171	10937	2044	2529	0	2	9134	3849	4393	12395	35195	7	0	10955	12554	15488	28336	83849	0	13949	5610	4464	25651	16215	11258	68070	34953	0	232	361	33958	3136	0	3109	2535	11543	1979	582
Nohivirus S31C1	88	17	4	2	2	1	0	4	1	17	10	12	8	0	3	4	9	1	1	405	5	6	20	2	7	10	6	0	31	5	3	0	0	29	16	10	1	17	1	2	1	15	0	3	0	0	0	0	0
Candidatus Omnitrophica bacterium	88	643	138	297	4	827	30	341	66	679	7	49	459	96	99	2	20	2904	1355	1115	377	1077	24	1	287	319	387	712	2929	3	3448	1496	1824	665	425	305	1597	1479	7	21	23	1173	318	13	1279	1122	5670	57	10
Lentibacter virus vB_LenP_ICBM2	88	13	3	5	7	3	0	5	2	8	17	49	6	0	1	9	61	11	6	917	9	22	37	3	3	7	14	11	37	20	16	9	9	17	8	7	17	20	11	1	2	22	3	7	6	6	13	4	1
Verrucomicrobia subdivision 3 bacterium	88	30296	7796	12513	0	7273	216	4202	575	11056	6	137	10820	2314	2570	1	9	22330	10885	1467	6517	15139	5	4	10655	14193	16786	649	139408	1	34674	15227	20900	26802	17389	12182	1153	87700	1	570	803	718	4421	6	13054	12288	75307	150	27
Synechococcus sp. BIOS-U3-1	88	618	116	227	3	37	0	228	36	492	5	65	340	88	79	0	14	141	64	1789	117	339	13	0	2781	3623	3973	479	24860	6	259	122	194	6530	4370	3622	178	21397	6	28	26	130	274	4	44	53	138	36	6
Microcystis aeruginosa	87	949	208	397	0	168	1	302	53	590	7	38	299	37	61	1	5	675	303	1037	189	559	8	0	395	493	613	362	2930	4	875	328	399	1202	750	547	529	1740	2	21	35	377	137	1	370	315	1546	141	33
Verrucomicrobiaceae bacterium TMED76	87	9115	1505	3672	0	1102	41	3055	540	6068	1	127	7785	1580	1852	0	0	2858	1377	829	2142	5666	2	0	5392	7046	8360	167	50552	0	6400	2796	3473	14655	9405	6371	167	22713	0	280	421	115	3656	0	1400	1381	7193	45	12
Synechococcus phage S-CBS2	87	35	5	14	3	0	0	8	0	17	6	48	10	3	2	6	19	3	4	1161	20	53	46	3	4	7	9	3	26	2	13	9	8	15	11	8	7	18	0	0	0	32	3	0	3	8	14	1	0
Marine Group III euryarchaeote CG-Epi2	87	1910	324	745	0	1248	42	577	115	1162	0	37	866	161	206	0	0	4957	2126	612	553	1426	0	0	1626	2097	2661	6972	45990	0	9912	3883	6297	2832	1896	1268	9893	17877	0	129	186	5979	4541	1	1390	1118	6725	27	9
Phycisphaeraceae bacterium	87	2235	543	923	3	1069	37	614	97	1334	22	97	2441	495	589	14	103	4120	2008	1695	933	2322	39	6	1532	2165	2589	550	37124	8	6522	2879	4972	6262	4075	2826	968	20317	5	41	73	638	791	45	1531	1383	9753	196	41
Caldiserica bacterium	85	154	29	69	1	138	3	88	8	166	12	23	88	11	12	2	11	459	188	658	97	235	8	0	74	90	106	190	664	4	517	193	238	150	106	74	369	350	5	2	4	271	74	3	208	154	828	15	3
uncultured Mediterranean phage uvDeep-CGR2-KM21-C345	85	3	0	1	0	5	0	1	0	5	1	35	0	0	0	3	28	18	8	922	4	4	32	3	1	5	0	1	17	7	23	7	15	9	4	3	12	10	3	0	1	14	1	3	11	5	34	1	1
Flavobacteriales bacterium TMED288	85	1404	249	540	1	222	4	967	158	1810	9	41	718	148	163	1	9	764	334	1184	740	2270	15	2	611	767	902	601	5792	8	1224	482	513	1300	863	554	1796	4014	2	8	22	1212	237	2	329	282	1152	235	60
Synechococcus phage S-CBS4	84	37	7	27	1	0	0	12	2	28	12	73	9	3	2	7	29	4	8	1789	20	35	46	1	4	5	8	1	20	6	8	3	3	16	10	6	12	10	2	1	0	9	4	2	2	3	11	1	0
Opitutae bacterium TMED102	83	29289	8109	12297	0	4824	147	3287	440	9046	0	198	12294	2640	3034	0	3	17079	8550	1075	6978	16136	9	0	5178	6815	8080	249	69030	2	26054	11642	15398	12005	7767	5777	237	38736	0	1095	1448	447	6932	2	8894	8503	48927	42	16
Prochlorococcus sp. HOT208_60m_813O04	83	5036	812	2022	0	43	1	5416	1027	11124	0	6	314	61	77	0	0	56	39	178	550	1771	5	0	338	402	551	63	3983	0	25	10	18	891	552	411	466	2599	0	49	92	1767	1433	0	52	53	151	918	274
Azorhizobium caulinodans	82	12	2	9	6	8	0	4	1	17	6	18	8	1	4	2	17	26	16	554	3	13	19	0	2	6	11	9	48	8	37	21	16	14	10	7	14	20	0	1	1	8	6	2	15	17	101	2	1
Rhodopseudomonas palustris	82	396	69	165	1	272	13	139	20	269	43	25	198	34	56	4	11	994	458	590	141	367	27	4	115	133	183	220	1336	7	1195	508	576	276	177	139	404	605	8	10	9	331	101	12	524	463	3057	41	7
Tenericutes bacterium	81	37	7	14	5	18	2	8	2	26	9	51	9	5	3	4	28	70	24	1267	16	48	31	0	13	18	21	22	96	9	74	22	42	46	24	19	53	59	8	0	1	50	7	6	37	35	137	6	2
Synechococcus phage S-CBS1	81	9	0	3	2	2	0	3	0	4	2	22	2	0	1	4	14	6	1	455	1	4	25	1	1	0	2	0	4	9	20	8	10	2	2	3	2	5	4	1	0	4	0	4	1	3	2	1	0
Marine Group III euryarchaeote CG-Epi5	81	1533	252	633	0	189	11	612	112	1159	0	33	597	110	146	0	1	718	321	391	494	1417	0	0	443	597	686	2266	11626	0	1139	444	673	804	488	336	3163	4447	0	19	29	1057	635	0	164	153	890	21	8
Candidatus Nomurabacteria bacterium RIFCSPLOWO2_01_FULL_42_17	80	24	0	7	6	13	0	13	1	22	10	29	7	1	1	3	13	47	20	688	16	30	21	2	11	13	28	30	77	9	62	32	38	26	23	14	48	51	8	1	1	33	5	3	26	13	100	7	1
SAR202 cluster bacterium Io17-Chloro-G3	80	1753	259	656	0	11017	316	439	85	862	1	14	686	139	173	2	1	30109	13750	275	637	1863	0	0	219	255	310	1543	3423	0	27048	11469	19930	328	199	156	1380	1325	1	112	194	10830	3751	1	18679	16849	87912	13	7
Siphoviridae sp.	79	25	3	5	4	4	0	8	2	18	9	35	5	2	3	4	11	31	7	628	2	17	18	3	9	5	8	14	50	8	49	17	27	12	6	6	24	22	2	0	3	11	2	5	21	18	131	1	0
Neisseriaceae bacterium	79	181	34	58	1	78	3	73	13	158	6	45	68	11	12	1	11	259	135	1136	78	221	18	1	67	91	96	165	583	5	461	176	187	148	108	77	282	294	3	6	4	235	37	5	149	136	713	17	4
Gammaproteobacteria bacterium TMED34	79	8116	1578	3245	1	2159	76	3649	650	7477	15	76	2978	642	704	2	13	6990	2959	2202	2960	8586	20	1	1811	2062	2535	4509	16996	7	9808	3999	3635	4183	2791	1863	12498	7476	9	298	456	11639	2652	10	2832	2330	10824	747	209
Chryseobacterium sp.	79	187	25	66	4	117	2	85	18	212	15	56	116	13	29	5	21	375	153	1380	109	262	42	4	77	89	124	131	740	8	345	126	198	204	111	84	293	450	5	3	8	198	45	10	163	141	865	38	13
Cytophagaceae bacterium	79	317	68	128	0	119	5	81	10	175	4	35	98	12	30	0	7	373	176	818	92	239	9	0	134	149	165	82	733	2	405	172	231	260	186	145	150	448	9	7	18	156	38	3	172	156	1053	40	10
Pseudoxanthomonas indica	79	25	4	11	2	13	0	4	0	5	11	27	9	2	2	2	20	71	28	530	12	26	21	2	10	21	15	29	88	11	65	28	32	24	11	13	22	35	13	4	1	21	8	17	18	24	140	1	1
Candidatus Marinamargulisbacteria bacterium SCGC AAA071-K20	78	338	48	150	1	362	18	138	26	295	10	41	182	30	35	2	17	1209	548	678	155	459	18	5	193	235	305	690	2966	9	1219	484	674	374	264	149	1645	1496	10	4	15	516	152	11	389	287	1476	35	12
Podovirus GOM	78	8	2	0	4	5	0	3	0	4	7	35	1	2	1	10	31	14	3	1174	3	11	53	7	3	9	7	2	20	14	31	12	26	12	10	2	2	13	9	1	1	23	1	10	7	2	14	0	1
Prochlorococcus sp. HOT208_60m_813L03	78	4651	781	1882	0	38	0	5191	966	10494	3	9	327	62	60	0	0	71	23	188	571	1596	6	0	263	261	325	32	2689	2	29	12	12	595	365	273	370	1695	0	46	89	1723	1413	0	51	38	148	926	284
Flavobacteriaceae bacterium TMED68	77	1905	335	783	0	67	4	1191	231	2458	3	42	1780	338	390	0	4	297	126	1423	1192	3470	6	1	503	574	709	2361	5251	2	443	195	218	1133	795	498	5537	2216	3	17	35	3148	328	6	100	80	349	198	64
Candidatus Aenigmarchaeota archaeon	77	199	32	77	0	193	3	82	18	157	14	31	102	24	17	1	15	598	267	796	105	230	13	7	76	98	126	159	662	13	697	311	334	186	103	97	373	335	6	2	7	311	65	8	300	292	1148	32	9
Burkholderia ubonensis	77	145	41	73	1	136	7	37	12	101	11	19	97	7	21	2	12	469	206	627	67	150	21	6	68	67	93	73	526	4	592	255	271	116	77	81	124	244	3	8	10	122	48	6	225	207	1210	34	7
Gammaproteobacteria bacterium TMED159	76	3410	564	1316	0	257	14	2085	381	4382	0	47	1522	285	343	0	1	862	347	1013	1383	3879	0	0	691	761	988	2693	5293	0	1320	540	475	1569	969	668	5129	2178	0	32	45	5706	214	0	345	274	989	659	208
Fluviicola sp.	76	817	152	358	1	471	12	600	99	1349	9	56	610	111	157	27	151	1676	732	1412	505	1648	21	4	532	711	805	386	5471	8	2484	1041	1260	1125	744	515	918	3907	7	15	20	439	246	4	891	763	3990	134	38
Synechococcus phage S-H68	76	73	9	17	1	0	0	25	6	56	12	87	13	1	5	1	18	8	5	2402	50	91	13	2	10	22	23	10	30	0	0	0	0	56	18	18	34	33	1	3	1	48	3	4	0	0	4	5	4
Burkholderiales bacterium	76	761	155	342	2	604	24	278	45	597	15	25	371	84	116	2	14	2117	941	759	296	751	30	4	226	261	316	505	2321	3	2932	1183	1343	564	335	263	711	1046	6	21	30	616	232	10	989	939	4842	60	17
Dishui Lake phycodnavirus 4	76	670	101	301	2	2	0	176	24	313	1	150	171	18	50	2	15	51	15	4244	388	1007	11	1	9	15	32	12	89	1	42	22	22	40	28	13	80	58	2	1	1	80	5	1	13	19	46	3	0
Halobonum sp. Gai3-2	76	27	6	9	4	16	0	3	0	15	6	28	7	1	2	3	14	63	21	613	7	19	20	1	15	12	14	13	80	14	72	28	29	21	15	12	25	24	17	1	4	39	16	5	31	32	128	0	1
Pseudomonas fluorescens	76	437	116	198	1	290	7	167	41	406	17	33	225	56	62	7	23	964	442	656	175	516	64	7	191	261	274	463	2003	5	1263	537	2149	420	289	210	602	927	11	28	22	429	161	8	612	543	4975	59	14
Candidatus Pelagibacter sp. TMED253	76	14849	2410	5733	1	3862	109	8921	1624	17868	1	137	9042	1781	2190	0	7	12294	5139	3199	9974	28504	5	0	8851	10430	12817	23644	76917	2	19346	7544	5968	21214	13674	9305	56900	33973	1	255	397	28606	2915	0	4322	3534	15736	1376	445
Arcticibacterium luteifluviistationis	76	172	27	85	3	133	11	88	14	167	10	31	105	21	25	1	6	413	194	716	91	269	23	5	79	86	121	182	868	3	576	228	353	170	97	80	387	498	2	3	6	185	46	6	174	160	952	16	2
uncultured Mediterranean phage uvDeep-CGR0-KM14-C182	75	12	1	3	5	34	1	1	1	6	7	40	0	0	1	4	22	52	29	783	5	20	36	7	3	9	6	19	21	9	58	24	32	17	11	9	19	19	7	1	2	35	3	5	76	89	254	2	0
Pelagibacterales bacterium MED-G40	75	21447	3497	8515	0	5748	194	11925	2144	24014	0	189	11352	2218	2731	1	1	17816	7342	4971	12679	36505	4	0	10439	11950	14685	26807	75147	2	22757	9146	6658	24377	15332	10803	62960	27848	0	342	511	50005	4150	0	5847	4843	22030	2235	660
Clostridioides difficile	75	230	39	83	3	160	6	92	16	191	7	24	118	31	25	3	9	521	249	667	89	247	9	2	117	123	164	193	877	6	652	267	256	294	178	135	429	472	5	10	4	242	68	1	225	188	937	62	18
Candidatus Pelagibacter sp. TMED263	75	16682	2772	6526	0	2326	75	10318	1868	21020	0	153	10523	1984	2535	0	2	7433	3184	4417	12131	34726	4	0	10397	12092	14710	25136	73995	1	10955	4176	3162	24743	15573	10751	64029	27588	0	248	406	37859	3198	1	2616	2049	9055	2170	666
Phycisphaerales bacterium	75	1637	402	654	2	1298	39	246	36	608	22	36	1132	213	250	16	97	4644	2207	732	511	1193	28	3	254	363	430	275	4130	8	6826	2856	3844	566	371	329	522	2579	2	26	40	530	477	51	1867	1733	13339	43	15
uncultured Mediterranean phage uvDeep-CGR0-AD1-C123	75	4	0	5	2	7	0	3	0	4	6	16	2	0	0	3	14	20	5	451	2	10	26	4	5	7	5	1	17	19	37	13	15	7	4	4	5	9	5	8	4	31	23	26	21	8	45	2	1
Podovirus Lau218	74	14	3	5	7	3	1	4	1	6	9	22	5	0	0	2	12	17	3	591	5	15	22	2	16	5	7	7	20	9	18	5	7	12	9	6	17	18	6	0	1	19	1	5	10	6	17	6	3
Thalassospira profundimaris	74	240	52	89	4	147	4	90	14	206	78	20	113	27	32	2	45	434	210	400	107	232	49	4	87	113	112	571	1067	6	643	290	364	274	176	120	578	505	103	39	43	490	186	87	1696	1629	9570	92	20
Mycobacteroides abscessus	74	467	124	176	3	274	12	136	17	308	17	46	270	53	53	7	24	1090	561	933	168	408	50	5	156	183	185	228	1083	5	1200	500	549	274	178	188	285	479	13	40	51	339	81	15	522	480	3598	80	15
Xylella fastidiosa	74	267	82	116	1	137	5	72	13	183	3	14	88	17	16	0	3	364	182	289	99	242	7	1	205	150	204	152	598	0	519	219	318	307	186	169	118	173	1	33	24	140	35	0	234	231	578	163	46
uncultured Gammaproteobacteria bacterium	74	302	63	99	3	618	18	100	11	190	5	25	124	40	41	1	8	1886	939	469	97	303	15	2	113	152	181	281	1036	3	3385	1403	1330	269	185	134	337	583	1	4	16	218	73	4	922	818	4110	46	14
Prochlorococcus sp. MIT 0801	74	4747	799	1951	1	56	3	2514	426	5032	0	14	365	82	93	0	0	203	91	334	490	1515	1	1	24452	29923	36805	1078	192884	3	304	132	637	50336	31749	21288	1932	104342	4	415	674	1128	11323	0	87	53	344	50	8
Marinobacter hydrocarbonoclasticus	74	1060	231	450	6	306	14	44	9	109	340	5	62	5	9	6	42	527	280	351	69	166	164	13	249	328	408	932	3286	5	451	441	309	236	135	129	477	1050	57	105	128	672	488	46	7968	7389	50344	111	24
Pelagibacter phage HTVC024P	74	11	0	1	2	0	0	5	0	7	12	38	2	1	0	5	26	12	4	826	4	19	29	4	9	11	9	10	25	14	17	5	7	12	8	5	7	13	5	1	3	19	2	5	8	3	13	3	2
Chlorobi bacterium OLB7	74	127	27	41	2	127	4	35	9	90	5	31	48	10	16	3	4	447	201	555	41	119	13	0	34	43	35	77	333	3	606	229	325	82	63	26	137	190	3	4	7	153	47	4	181	186	952	7	1
Enterococcus faecium	73	570	125	245	0	75	1	130	20	317	6	22	208	37	41	0	3	288	137	1089	177	457	2	0	261	330	437	81	1298	0	275	139	112	604	399	315	179	790	0	19	29	151	32	1	118	125	402	53	14
Moorea producens	73	348	135	147	1	190	5	91	17	238	3	29	65	25	15	1	3	581	248	592	111	289	6	1	206	206	230	123	934	2	677	284	291	350	237	208	195	345	2	18	22	161	56	2	280	276	1203	232	49
Sinorhizobium phage phiM6	73	1	0	4	4	9	0	2	0	10	4	20	1	0	0	3	18	19	4	596	4	10	19	1	6	8	6	9	20	10	41	16	21	26	5	4	16	11	6	0	1	24	4	4	8	16	37	1	0
Enhydrobacter aerosaccus	73	836	171	359	1	669	22	265	42	596	24	23	449	71	81	2	13	2212	1060	686	338	809	17	2	290	326	412	439	3050	4	3185	1376	1390	675	454	303	880	1440	12	23	24	638	274	10	1122	1029	4823	69	21
SAR11 cluster bacterium PRT-SC02	73	14837	2323	5761	0	2266	74	8569	1561	17475	0	130	8974	1721	2106	0	2	7174	2895	3937	10009	28912	3	1	4533	4998	6308	11636	32110	0	8584	3413	2469	10429	6525	4656	27538	12192	0	197	324	29323	2204	0	2318	1917	8992	1783	499
Phenylobacterium zucineum	73	140	25	60	0	76	1	70	10	136	11	20	109	18	28	3	15	309	152	540	74	213	24	1	59	89	104	123	598	8	405	160	165	179	128	79	198	343	4	9	6	145	53	7	145	151	1433	33	6
Enhygromyxa salina	73	912	242	390	2	499	14	160	27	451	13	26	381	96	84	0	2	1739	835	559	229	551	9	0	142	181	240	222	1738	3	2087	915	1199	278	212	164	292	997	10	28	39	246	202	4	741	695	3848	70	13
Synechococcus phage S-RIM2	73	89	11	34	1	1	0	30	8	67	15	108	24	6	9	3	22	8	7	3345	75	188	23	1	12	22	28	33	57	1	9	6	5	53	24	11	39	52	4	5	1	65	10	4	9	3	14	3	1
Lachnospiraceae bacterium	73	438	75	152	2	332	20	217	33	444	8	30	199	41	69	0	15	1124	514	850	216	588	19	0	169	187	239	366	1638	13	1463	549	639	465	280	222	767	871	7	18	18	528	147	3	465	449	2087	38	13
uncultured Candidatus Thalassoarchaea euryarchaeote	73	3537	578	1421	0	111	4	1256	216	2483	0	89	2275	440	573	0	1	531	218	1080	1947	5582	2	1	1587	2091	2597	5879	38808	1	755	330	547	2896	1884	1218	7432	18160	0	22	32	843	506	0	110	86	571	35	10
Tardibacter chloracetimidivorans	73	109	29	42	0	97	2	30	12	72	12	21	65	7	9	2	25	270	143	555	40	128	23	2	29	43	41	68	307	12	313	108	156	83	43	46	118	137	15	7	5	134	26	12	129	121	707	9	3
Ostreococcus mediterraneus virus 2	73	1056	164	405	0	4	0	250	42	492	5	274	263	51	58	5	38	37	14	7466	645	1768	19	5	13	21	33	28	54	1	27	13	3	37	28	14	104	71	0	0	0	51	5	1	5	8	7	4	0
Hyphomonadaceae bacterium TMED5	72	180	47	60	0	201	5	58	11	149	46	21	198	34	61	2	3	1189	576	502	66	193	18	0	81	124	107	219	634	8	942	523	1559	188	128	104	222	351	7	19	16	409	325	15	1540	1467	18977	24	5
Pelagibacteraceae bacterium	72	17096	2893	6656	0	53896	1801	11977	2207	24441	2	133	11584	2171	2744	0	2	164940	68072	3681	12591	35536	3	0	13290	14755	18066	31184	101074	2	190037	75535	56698	30407	19273	13436	87910	38419	0	218	342	40162	3940	2	63150	51292	241568	1501	426
Myxococcales bacterium	72	1060	267	429	2	1215	35	288	43	644	23	47	558	127	135	8	19	4287	2051	862	326	856	22	0	246	281	343	539	2604	16	4801	2100	2654	517	318	239	687	1459	12	36	55	715	341	9	2248	2153	11004	83	18
Campylobacter concisus	72	254	52	90	2	236	9	157	35	332	3	27	142	31	39	2	8	625	275	728	165	398	12	3	133	150	207	257	1110	3	841	340	403	322	218	140	681	579	3	9	12	388	91	6	284	202	1087	54	15
Sphingobacteriaceae bacterium	71	846	138	328	1	276	7	358	55	791	7	35	456	93	110	0	11	913	403	822	427	1280	12	0	561	681	849	498	3951	3	1201	493	616	1360	875	579	1178	3040	7	14	17	581	192	2	414	396	2298	118	44
Salipiger bermudensis	71	98	21	41	2	276	6	25	5	56	21	27	158	29	35	5	40	1372	706	345	42	105	270	31	41	38	52	158	660	71	1385	773	667	86	50	50	120	330	61	116	134	1003	236	25	4574	4769	84201	44	7
Haemophilus influenzae	71	450	97	206	1	182	7	136	23	295	7	7	159	31	34	0	12	649	285	292	124	313	14	1	200	234	256	357	1195	0	668	325	281	451	298	206	293	502	2	19	24	239	74	6	322	328	2569	156	52
Spongiibacter tropicus	71	124	25	55	0	635	22	48	5	106	169	4	191	35	45	5	35	386	172	37	64	135	61	6	50	64	73	435	553	77	1239	903	205	151	110	67	561	278	91	119	208	2210	934	6	10977	10646	55534	28	11
Haliscomenobacter hydrossis	71	225	46	92	4	186	5	102	28	228	6	17	118	19	27	0	9	638	285	675	104	283	17	0	83	87	131	150	1007	0	814	315	460	223	102	60	338	564	5	6	6	220	88	0	331	299	1545	23	3
Winogradskyella algicola	71	253	38	95	0	64	1	147	33	319	1	7	40	12	12	2	4	361	156	2554	39	114	7	1	193	240	327	417	2315	0	630	378	116	1036	684	419	277	1532	0	9	12	565	393	3	2017	1641	30965	46	7
Pelagibacterales bacterium MED-G44	70	17163	2901	6706	0	2110	63	12112	2176	24470	2	132	9223	1806	2207	0	1	7516	2952	3636	11114	32152	2	0	10504	12256	14908	28995	79862	1	12195	4954	2895	26492	16948	11411	80559	31200	1	166	284	31288	2384	1	2436	1988	7918	2230	650
Limnoglobus roseus	70	228	51	79	2	224	6	39	11	106	6	21	132	16	23	0	10	757	391	846	59	171	17	1	46	66	89	51	594	5	1095	400	605	123	63	53	121	375	3	15	17	106	94	8	393	316	1806	20	4
Proteobacteria bacterium TMED61	70	2561	474	1033	0	4105	117	879	138	1707	7	66	1995	423	504	0	6	14201	6074	1445	1079	2957	6	1	4061	5333	6201	3204	47628	3	24100	9444	8373	9994	6490	5147	5843	22949	0	44	48	3126	959	0	5292	4581	22406	93	28
uncultured Mediterranean phage uvDeep-CGR2-KM18-C74	70	15	7	8	5	6	1	5	0	11	7	22	1	0	0	0	9	21	15	493	5	6	22	0	17	19	17	26	32	8	52	15	17	37	30	16	36	32	5	3	3	25	2	6	50	40	105	2	0
Planctomycetia bacterium	70	622	124	229	4	745	17	169	29	309	6	33	424	78	93	0	20	2369	1161	727	197	548	17	0	134	174	203	151	1909	4	3638	1613	2417	321	219	172	304	1110	3	23	41	270	344	7	1070	1062	5697	20	8
Pelagibacterales bacterium MED-G43	70	17557	2985	6908	0	1672	56	10645	1841	21365	2	198	14286	2790	3238	0	3	5446	2201	5429	15868	46037	11	0	7539	8942	10987	19968	55837	0	7207	2832	2189	18053	11570	7742	48584	20987	0	200	295	29671	2324	0	1869	1489	6799	1983	593
Candidatus Pelagibacter sp. TMED196	69	21224	3662	8293	0	5672	174	12905	2288	26652	2	152	9978	2002	2416	0	0	18464	7484	4652	11278	32647	2	2	6062	6913	8328	15194	45343	0	21495	8504	6366	14100	8991	6218	39937	16915	0	511	785	67128	5615	1	5767	4769	22262	3466	1037
Pedobacter sp.	69	628	110	238	0	361	18	337	56	710	10	36	375	74	109	1	13	1244	545	905	365	1006	24	0	384	463	531	496	3248	1	1636	689	839	960	590	422	1158	2229	11	15	28	577	215	8	581	505	2993	152	41
Rhodothermaeota bacterium MED-G19	68	12325	2105	4941	0	1755	49	8516	1540	17576	3	130	6610	1296	1656	0	0	8283	3503	1153	7429	21875	2	0	4619	5293	6772	33036	88010	0	9262	3602	6525	9711	6265	4269	110277	57313	0	94	180	29415	2626	2	1283	1082	4976	627	148
Marisediminitalea aggregata	67	82	16	24	0	150	6	30	3	59	0	18	446	79	94	0	0	9616	4596	94	10	43	1	2	32	31	24	215	735	0	173	120	23	78	61	35	203	111	0	14	19	72	277	1	2324	2139	6970	22	0
Pelagibacteraceae bacterium TMED216	67	9218	1516	3675	0	2667	95	5694	1026	11522	0	94	6023	1116	1367	1	3	8809	3590	2963	6590	19037	8	1	3784	4313	5386	9927	27794	5	10797	4276	3130	8920	5832	3972	23761	10393	1	125	185	19656	1577	1	2996	2448	10962	997	338
Planctomycetes bacterium TMED75	67	1308	371	551	2	336	12	160	22	421	10	36	1029	238	261	2	13	1800	889	505	368	814	15	1	192	294	336	152	3834	4	2539	1020	1202	513	352	310	283	2765	3	8	27	146	137	5	429	386	2247	23	5
Qipengyuania flava	67	21	7	14	0	397	8	11	5	26	35	8	143	19	36	12	76	1436	788	32	9	30	69	4	18	27	30	50	419	0	544	248	257	38	36	34	38	172	3	9	12	177	217	57	366	374	22426	11	3
Synechococcus virus SRIM44	67	167	27	49	0	3	0	83	13	122	5	54	50	11	7	1	10	14	7	1858	52	168	15	1	16	14	20	10	68	3	20	8	9	41	29	14	28	34	5	2	6	61	1	7	2	6	27	5	1
Sphingomonadaceae bacterium MED-G03	67	6	0	3	0	3329	92	1	0	0	9	42	2387	604	586	1	4	19389	10506	6	4	8	1	0	1	2	0	658	169	0	72	35	587	6	1	2	110	110	0	29	47	344	65	15	1540	1631	7234	44	18
Alteromonas sp.	67	293	55	123	0	682	17	17	5	37	0	15	78	22	22	1	2	2064	961	124	13	38	12	1	398	568	680	1522	1646	1	2484	1113	494	488	292	261	666	1522	1	17	20	218	344	0	784	654	25288	22	7
Gemmatimonas sp. SG8_38_2	67	136	37	57	2	299	10	20	5	50	14	36	56	13	25	3	16	1085	496	819	38	103	28	2	26	24	32	68	256	19	1311	540	653	57	41	24	97	173	11	5	9	169	43	12	528	438	2017	5	2
uncultured phage MedDCM-OCT-S09-C399	67	1	2	1	0	1	0	2	0	0	4	24	1	0	0	1	4	3	0	483	1	8	14	1	1	4	6	0	9	3	3	0	0	5	2	2	3	6	1	0	0	9	1	2	5	1	9	3	2
SAR92 clade bacterium	66	4300	756	1811	0	682	19	2475	432	5045	7	42	1812	342	394	0	6	2195	973	650	1738	4672	15	3	1100	1341	1576	3027	12970	1	7419	2841	3018	2772	1838	1197	3174	7358	5	55	65	2106	607	4	889	752	3554	3614	1070
Prochlorococcus T7-like virus P-GSP1	66	9	2	6	2	0	0	5	0	8	9	10	1	0	0	0	3	0	0	178	2	4	4	0	0	0	0	0	2	0	0	0	0	0	0	0	0	2	0	0	0	1	2	2	1	0	0	0	0
Burkholderiaceae bacterium	66	4324	815	1702	3	601	19	1777	296	3707	13	44	3076	582	727	4	15	1983	854	939	2028	5535	39	3	362	459	550	583	3795	8	2718	1067	1139	886	581	389	1263	1807	13	42	77	1293	634	8	908	843	4025	516	152
Microbacterium aquimaris	66	2	2	2	1	1832	59	4	0	3	0	31	317	80	72	0	0	11906	6617	13	6	10	1	0	4	7	3	3	46	1	145	74	60	12	6	11	4	34	1	140	147	51	48	22	1569	1712	8422	103	22
Flavobacteriales bacterium MED-G15	66	495	76	196	0	65	1	332	66	649	1	12	553	91	132	0	0	168	85	543	320	868	4	0	163	192	247	1231	2724	1	352	119	161	436	272	168	1952	1102	0	14	12	2080	139	0	97	77	320	37	12
Capsulimonas corticalis	65	174	29	84	0	147	8	55	6	121	4	37	70	22	15	1	3	397	228	814	68	144	6	1	34	42	61	111	443	2	564	225	317	88	52	40	138	237	1	4	5	188	48	2	229	191	1105	9	7
Candidatus Melainabacteria bacterium	65	432	80	164	1	500	10	210	36	408	6	37	238	47	56	4	11	1495	686	892	215	639	12	2	201	235	326	453	1693	4	1771	799	809	589	371	248	800	972	5	9	20	602	176	1	654	598	2770	46	11
Methylophilales phage HIM624-A	65	6	0	4	4	0	0	2	0	4	13	19	1	0	2	3	22	6	6	515	0	7	30	5	2	0	2	3	9	9	9	2	9	9	5	2	4	13	3	0	0	5	0	7	3	7	8	0	0
Synechococcus phage S-SSM4	64	58	9	22	1	0	0	18	1	52	3	14	9	1	1	1	5	3	0	348	12	30	6	1	3	2	3	1	9	1	0	0	0	9	3	6	4	13	3	0	3	14	1	1	1	0	0	1	1
Vibrio cholerae	64	461	78	156	2	356	16	135	20	323	13	24	238	40	41	3	32	1396	665	599	134	348	89	6	314	349	490	863	2693	4	1920	986	577	584	381	257	734	1673	16	27	25	377	254	12	797	686	13859	53	14
Prevotella copri	64	94	24	41	0	85	0	39	5	114	12	15	51	8	14	2	14	207	80	705	55	162	10	1	57	60	66	86	403	4	291	106	143	87	67	56	141	222	5	2	6	90	40	4	89	82	482	16	7
Prochlorococcus phage MED4-184	64	1	0	0	1	1	0	0	1	2	4	21	0	0	0	1	5	0	2	388	2	0	12	0	0	0	1	0	0	1	0	0	0	0	0	0	0	1	0	0	0	0	0	3	0	0	0	1	0
bacterium SCGC AG-212-C10	63	133	24	53	4	175	7	35	5	75	15	21	64	16	16	6	19	631	262	556	49	103	24	5	24	41	44	53	323	13	877	380	480	44	31	24	79	155	6	9	6	351	150	7	333	302	1435	14	1
Candidatus Actinomarina sp. HD9-500m-PIT-SAG01	63	33612	5493	13391	0	168	8	16756	2964	33690	0	174	14396	2803	3372	0	0	446	174	4674	12603	35946	3	0	2048	2366	2816	15302	11429	0	134	63	54	4238	2695	1864	23452	5820	1	205	337	37848	914	1	105	77	126	1701	482
OM182 bacterium MED-G28	63	15040	2583	6128	1	5310	147	3492	613	7426	9	67	6902	1409	1669	0	16	21504	9708	753	4799	12876	41	4	1885	2627	3033	2403	34185	1	46643	19385	23049	5372	3482	2448	3224	19344	8	288	429	5802	4636	5	8832	7888	39722	127	29
Aureliella helgolandensis	63	442	83	187	0	409	11	75	14	182	2	24	207	53	64	1	4	1277	584	430	124	333	10	1	78	98	119	72	1057	1	1875	787	1208	186	119	84	85	686	2	29	39	94	327	0	610	585	3092	13	1
Clostridiales bacterium	63	541	102	225	4	502	21	286	55	600	7	33	357	74	63	2	9	1529	667	816	322	851	19	1	227	223	315	552	2252	6	1957	819	1009	522	341	239	894	1083	4	14	25	894	249	1	687	643	3023	60	17
Leptonema illini	62	70	15	34	0	43	3	18	2	45	2	0	39	5	9	0	0	131	51	99	19	53	0	0	21	26	32	62	177	0	159	59	74	42	26	15	101	120	0	1	2	60	18	0	81	52	261	4	2
Planctomycetes bacterium ETA_A8	62	879	189	339	1	921	29	121	28	302	6	29	391	95	103	2	7	2719	1380	691	248	584	14	2	123	169	203	63	1920	6	4411	1904	3088	341	202	175	93	1365	1	82	105	239	822	2	1397	1349	6976	9	2
Proteus mirabilis	62	126	36	56	0	57	0	46	8	109	2	7	41	9	14	0	3	254	102	371	56	149	2	0	98	96	122	66	406	3	272	117	115	175	127	87	84	175	1	10	12	71	36	1	131	100	998	54	12
Phage NCTB	62	265	49	101	0	27	2	8	0	10	0	6	16	9	3	0	0	27	15	52	4	15	1	0	27	36	29	9	64	0	9	8	4	31	15	7	22	28	0	0	0	19	0	2	7	5	19	2	0
Bdellovibrio sp. NC01	62	86	12	40	1	44	2	42	3	70	10	21	34	7	11	2	6	138	74	634	42	127	16	0	54	60	96	429	545	6	186	67	112	86	58	41	195	170	2	1	3	152	27	1	168	125	361	6	1
Synechococcus phage ACG-2014e	61	220	34	70	1	1	0	94	15	190	9	38	36	9	9	2	6	7	3	1205	36	130	9	1	10	18	17	10	72	3	13	9	2	51	25	18	20	44	1	2	4	54	7	6	2	5	21	15	4
uncultured cyanomyovirus	61	38	11	14	3	7	0	18	2	38	9	41	15	1	6	1	6	14	5	918	16	58	18	1	8	12	22	10	38	2	35	5	13	22	18	12	16	25	3	1	5	53	3	2	23	17	57	5	1
Bacillus thuringiensis	61	225	36	81	3	89	3	69	15	125	2	23	85	27	21	0	4	336	168	723	57	203	11	4	90	101	110	77	554	6	438	157	163	157	121	101	133	256	4	12	14	143	42	1	159	130	557	27	9
bacterium TMED190	61	3006	495	1172	1	2123	65	1769	294	3621	1	37	1544	312	360	0	6	7491	3402	826	1770	4974	7	2	353	418	558	2376	7097	2	6015	2444	3816	761	430	332	4021	3645	0	108	207	25037	1894	1	1941	1732	8537	87	30
Alphaproteobacteria bacterium MarineAlpha9_Bin3	61	14131	2335	5525	0	976	38	8391	1505	17314	3	150	10737	2104	2601	0	0	2674	1191	1647	12856	36766	3	1	4265	4780	5973	5513	64777	1	9464	3647	4613	11105	6972	4785	23027	20696	2	291	474	20303	8093	1	1897	1551	8079	115	36
Pelagibacterales bacterium MED-G42	61	16528	2747	6380	0	4238	125	12063	2212	24790	6	146	10877	2024	2538	0	0	14114	5785	3801	12111	34553	4	0	14698	17014	20763	37495	117214	2	25630	9843	6165	36671	23634	16030	111317	46222	0	195	293	34180	2814	1	4837	3797	15952	1833	495
Rhodocyclaceae bacterium	61	497	96	189	2	447	18	167	34	396	14	23	230	43	70	7	17	1627	666	808	193	540	34	5	194	206	231	551	1842	4	2264	959	996	369	250	179	810	867	10	19	13	466	132	12	769	649	3586	52	12
Nitrosomonas sp.	61	130	32	52	0	91	6	48	7	94	5	8	68	19	11	0	7	330	144	202	48	134	10	1	54	58	82	180	510	0	550	240	239	122	75	54	216	234	1	3	7	107	34	2	137	158	724	12	7
Limnothrix rosea	61	53	7	29	4	18	1	20	6	37	10	12	19	6	8	0	6	78	35	331	21	53	5	1	27	36	54	35	179	1	96	32	50	93	49	39	51	82	0	3	1	31	22	3	45	41	179	6	5
Synechococcus virus Syn30	60	39	8	15	2	0	0	15	3	28	8	97	20	4	9	1	21	8	5	2913	52	149	28	5	7	7	23	19	33	3	0	2	2	22	13	16	41	37	1	0	4	18	2	5	3	0	7	2	0
Gemmata obscuriglobus	60	171	40	88	0	183	3	45	5	103	2	17	113	26	18	1	6	609	301	397	50	163	11	3	34	50	64	76	428	3	808	352	402	99	71	55	103	254	4	11	11	145	88	6	307	290	1357	14	5
Gammaproteobacteria bacterium TMED180	60	9407	1595	3732	0	418	15	3025	545	6373	0	26	2696	554	637	0	0	1390	664	337	1926	5248	5	1	1783	2271	2760	3452	22099	0	2717	1117	1017	4486	2825	1944	4871	13795	0	125	158	2902	1240	0	493	459	1867	572	166
Candidatus Aminicenantes bacterium	60	596	116	214	1	853	22	219	40	450	7	38	281	43	62	3	12	2833	1311	1012	267	746	7	0	163	174	245	559	2071	6	3451	1435	1841	370	254	173	1026	1052	3	8	19	818	211	5	1361	1198	5745	42	12
Verrucomicrobia bacterium RIFCSPHIGHO2_12_FULL_41_10	60	115	28	50	2	83	3	55	6	88	5	22	62	11	11	1	11	230	105	505	46	140	14	2	48	53	69	80	340	9	291	133	166	104	59	49	162	209	2	3	5	93	16	1	108	106	495	11	0
Candidatus Pelagibacter sp. TMED286	60	13384	2379	5324	0	1727	47	9382	1616	19044	0	153	10254	2067	2371	0	1	5726	2313	4112	12339	35603	4	2	7247	8122	10173	16158	52841	0	8271	3265	2313	17470	11085	7498	49779	20045	1	142	232	23491	1954	0	1911	1567	6592	1629	453
Microcella putealis	60	3	2	2	0	6	0	0	0	3	2	1	2	0	1	0	0	41	15	4	1	5	1	0	2	3	1	4	20	0	29	14	18	6	5	4	5	9	0	13	16	44	33	17	191	208	7773	5	4
Dialister micraerophilus	60	43	6	14	6	27	0	17	3	57	4	24	19	2	1	3	4	70	40	507	21	53	7	0	22	23	32	46	152	4	92	42	38	51	32	10	91	57	5	2	5	59	13	4	37	26	161	3	0
Candidatus Korarchaeota archaeon	59	148	28	68	0	157	5	55	7	111	7	31	57	18	12	2	10	445	190	713	51	160	22	3	69	74	101	117	560	5	558	217	264	155	96	81	200	310	4	6	8	170	67	2	251	223	1034	14	5
Candidatus Puniceispirillum sp. TMED213	59	5213	954	2067	1	164	7	1693	302	3620	4	33	2194	414	545	1	7	516	212	1027	1742	4543	12	1	417	496	558	402	4238	7	671	315	316	1057	633	462	1053	2233	4	40	50	695	372	2	222	182	862	661	204
Paraburkholderia caribensis	59	61	11	16	0	23	0	22	2	39	3	10	29	5	3	0	4	111	49	733	9	49	8	0	17	21	38	50	180	0	130	61	66	57	37	22	60	78	1	1	2	66	21	3	59	57	228	19	10
Candidatus Pacearchaeota archaeon	58	155	28	57	4	115	2	89	17	185	3	23	79	10	14	1	6	364	157	663	80	223	14	1	47	48	63	98	403	6	402	159	196	89	56	40	247	204	1	4	12	238	45	2	196	180	662	18	8
Kordia sp.	58	154	31	70	5	135	3	75	21	172	13	43	116	29	35	5	14	495	215	857	109	266	20	6	105	148	152	162	1006	6	1023	377	515	269	171	124	359	635	9	3	10	226	50	4	302	278	1583	21	10
Prochlorococcus sp. HOT212_60m_824O11	58	4432	701	1701	0	47	4	4473	789	9306	2	17	292	62	65	1	2	123	48	304	461	1365	5	1	348	400	497	63	3665	2	57	31	40	826	604	363	551	2294	1	44	69	1433	1088	0	51	60	176	743	205
Synechococcus lacustris	58	537	105	217	1	54	3	251	35	558	8	35	270	59	79	4	7	203	93	1183	104	297	13	1	300	398	459	85	2585	3	237	95	151	685	425	278	160	1600	0	34	56	208	622	1	85	91	412	34	11
Chryseoglobus sp. KN1116	58	6	2	2	0	16	1	0	0	4	51	0	4	3	0	0	1	82	42	4	3	2	20	4	2	0	1	2	20	1	19	9	18	3	0	1	4	16	4	5	6	80	33	13	197	196	4928	11	2
Oceanospirillum beijerinckii	58	971	175	403	0	70	1	43	4	99	4	2	48	9	16	1	5	336	123	106	29	112	4	0	36	46	60	95	414	0	403	182	193	90	71	27	127	186	3	2	1	75	30	0	138	122	546	15	1
Kiritimatiellaeota bacterium S-5007	58	224	36	77	1	149	1	69	11	167	1	28	94	22	26	0	5	509	204	613	71	176	20	1	38	54	67	79	472	0	681	246	358	96	55	35	126	234	0	5	7	140	63	1	232	231	1114	18	8
Synechococcus sp. CBW1004	58	227	52	89	3	19	0	82	13	191	9	24	119	18	37	0	7	60	34	637	43	105	9	1	134	155	182	39	993	0	84	41	49	324	210	158	46	721	1	18	31	119	369	3	46	37	137	13	10
Yasminevirus sp. GU-2018	58	155	37	70	0	34	1	59	17	124	0	34	60	12	15	0	5	140	51	938	77	225	5	0	57	63	90	47	352	0	174	88	80	141	70	63	187	226	1	9	7	137	46	2	96	81	254	22	6
alpha proteobacterium HIMB5	57	13331	2250	5246	0	3990	140	9688	1742	19498	4	135	8654	1646	2029	0	2	13084	5461	3036	10077	28687	5	0	7457	8373	10316	18781	56575	3	22066	8483	5309	18015	11351	7806	52891	21979	2	126	176	24165	1975	4	4517	3685	15049	1365	377
Fluviicola sp. XM-24bin1	57	337	50	124	0	120	7	247	59	521	11	42	261	55	57	3	4	494	202	1076	238	737	15	1	217	280	307	168	2136	5	629	279	366	465	293	203	280	1632	0	6	6	160	111	5	227	181	2466	54	13
Enterobacter hormaechei	57	312	72	130	3	84	2	81	7	157	11	21	115	42	27	2	16	257	143	559	100	194	20	3	106	148	150	130	751	2	324	151	136	285	189	112	164	418	1	6	9	145	34	8	154	151	899	26	11
Alphaproteobacteria bacterium MarineAlpha3_Bin5	57	1845	343	817	0	1431	50	602	114	1294	12	14	901	189	197	1	5	4329	1966	592	678	1917	11	1	911	1151	1412	782	10107	3	5347	2274	2242	2472	1581	1130	1793	4856	6	28	44	1103	564	8	2023	1770	7891	115	35
uncultured bacterium BAC13K9BAC	57	1919	327	754	1	58	2	1140	187	2084	1	42	600	128	135	0	1	223	74	968	750	2296	1	0	590	736	948	4135	3597	0	300	136	87	1423	896	612	4787	1301	0	15	25	3450	107	1	97	57	235	392	113
Candidatus Pelagibacter sp. TMED106	57	14923	2579	5908	0	8484	294	11037	2006	22074	5	153	9413	1779	2317	0	1	27614	11516	3481	10863	31071	5	0	11613	12987	15891	26980	87513	1	55618	21276	12788	27090	17175	11974	80129	33255	2	181	280	34791	3050	4	9922	8009	32529	1524	447
alpha proteobacterium MED-G10	57	5015	850	1944	1	204	8	2947	530	6164	1	35	4029	765	911	0	0	751	317	491	4496	12731	4	1	1515	1690	2260	784	14542	5	692	285	309	4408	2904	1961	3935	6670	4	54	100	1853	1853	1	247	223	829	659	202
Gallionellales bacterium RBG_16_57_15	57	21	4	14	4	17	1	8	1	17	13	20	15	4	5	2	13	59	36	409	8	28	13	1	8	12	17	21	59	12	61	27	34	33	14	8	24	33	2	2	1	31	2	3	28	26	129	0	0
Burkholderia multivorans	56	185	68	80	0	117	1	53	4	121	8	17	86	15	15	1	4	323	147	289	68	131	4	2	91	51	71	55	390	3	409	193	179	101	68	70	78	144	1	18	18	97	41	3	137	163	785	84	17
Zetaproteobacteria bacterium	56	976	155	420	0	548	20	276	48	595	19	15	373	74	80	1	10	1845	842	779	292	804	22	2	186	245	317	512	2206	9	2088	902	1105	500	327	262	866	1089	6	13	14	620	191	4	935	769	3811	56	18
Streptococcus pneumoniae	56	242	73	106	1	192	3	99	13	179	5	36	157	32	46	3	10	577	291	779	94	285	30	0	97	136	126	200	854	7	677	282	323	218	144	123	299	413	4	12	15	250	79	4	333	285	3414	53	8
Hyphomicrobium sp. ghe19	56	37	7	10	2	12	0	9	2	25	10	23	19	3	2	2	8	46	30	392	13	39	21	1	12	11	18	25	93	9	67	22	39	29	23	18	29	55	4	0	0	41	4	2	33	21	191	2	3
Cryomorphaceae bacterium BACL11 MAG-121128-bin16	56	819	131	328	0	504	16	600	118	1284	8	31	513	111	122	1	12	1556	660	474	735	2140	9	0	876	1104	1235	104	9229	15	4940	1878	2348	1808	1143	733	603	5565	5	6	11	62	188	1	1548	1220	3742	60	16
uncultured phage MedDCM-OCT-S09-C299	56	14	0	7	1	2	0	4	0	4	5	35	2	0	0	3	22	6	3	830	4	12	32	5	2	3	2	1	8	14	9	2	1	9	6	0	3	10	4	2	1	37	2	5	1	2	1	0	1
Crocinitomicaceae bacterium TMED114	56	699	144	324	4	261	4	305	48	661	12	32	261	63	50	4	12	932	366	937	296	746	18	3	268	370	434	211	3081	15	1414	585	814	525	320	231	308	1972	10	14	17	317	153	4	442	347	1915	73	19
Zavarzinella formosa	56	237	45	133	2	348	18	82	10	157	3	28	132	27	33	0	7	1051	499	764	89	243	18	0	48	73	106	60	744	7	1600	683	1030	133	101	68	114	451	3	23	11	155	155	4	541	499	2822	16	8
SAR116 cluster bacterium	56	11247	2298	4658	0	823	33	3416	594	7505	9	30	3690	783	861	0	4	2786	1143	414	2768	7315	4	0	1982	2328	2856	1536	23658	7	3723	1497	1488	5097	3229	2405	4143	13337	7	172	173	3346	1573	4	1166	1024	3952	3463	897
Alphaproteobacteria bacterium 43-37	55	184	43	61	1	97	2	81	14	197	7	11	101	14	24	0	2	323	137	296	102	236	12	2	66	93	138	172	874	2	415	158	144	208	131	103	303	352	3	3	1	215	64	5	114	116	521	25	9
Alphaproteobacteria bacterium MarineAlpha8_Bin1	55	4312	752	1669	0	200	9	2597	452	5609	2	36	3432	635	777	0	0	783	330	350	3928	10792	0	1	897	977	1252	654	9120	1	751	283	307	2469	1596	1089	2718	3874	1	54	91	1950	1942	0	229	207	850	610	192
Alteromonas sp. I4	55	83	21	45	0	127	5	17	4	51	1	11	227	45	62	0	0	5464	2589	81	6	32	1	0	44	45	75	127	759	0	177	160	46	97	57	38	117	324	1	9	15	59	223	0	1517	1337	6281	23	6
Bacteriovorax sp. BSW11_IV	55	355	46	131	3	195	8	108	24	239	8	26	187	30	38	1	3	585	287	547	155	449	13	1	73	135	150	872	1063	3	556	264	270	206	150	83	707	468	0	15	24	584	146	0	351	297	1246	22	4
Flavobacterium filum	55	105	21	33	3	17	1	44	4	103	16	44	28	8	12	0	4	69	34	738	33	94	10	1	37	53	62	43	307	2	134	47	66	80	48	39	78	180	4	1	6	60	20	5	33	32	441	11	2
Rhizobium phage Pasto	54	3	1	1	3	0	0	0	0	2	4	9	0	0	0	2	7	2	0	302	1	8	13	3	0	2	2	3	4	0	7	3	2	3	0	0	3	7	0	1	0	8	1	2	3	2	2	1	0
Agrobacterium tumefaciens	54	166	23	63	0	92	1	63	8	124	7	3	72	14	26	2	9	305	127	307	59	160	20	3	59	75	101	118	539	9	361	173	167	170	102	76	157	314	4	2	7	189	42	17	154	157	2344	22	2
Aphanocapsa feldmannii	54	325	60	118	0	66	3	194	38	398	12	27	111	23	28	2	12	177	80	833	61	190	9	1	175	232	255	49	1303	1	239	101	116	481	327	208	169	840	1	28	24	193	360	1	72	84	401	47	8
Flavobacteriaceae bacterium TMED238	54	5763	1001	2247	0	1893	48	4090	758	8250	1	104	4070	807	978	1	5	5888	2520	1513	4484	12821	15	1	3260	3698	4790	9828	34888	1	8499	3489	4442	8236	5247	3611	22991	19458	1	55	103	6702	964	1	2268	1787	10289	463	134
Novosphingobium sp. KN65.2	54	29	5	15	3	33	1	8	3	28	12	13	27	5	2	4	9	190	83	442	17	28	16	2	7	10	14	26	70	9	50	34	46	18	12	11	33	26	4	1	1	34	17	21	59	66	1343	8	0
Fimbriiglobus ruber	54	278	73	112	0	301	11	46	4	120	7	25	141	23	32	2	9	1009	496	537	85	194	13	1	63	65	87	48	653	1	1575	668	920	111	90	77	110	396	3	23	25	105	102	0	521	487	2709	13	4
Oenococcus oeni	53	67	18	35	1	49	2	27	5	25	8	68	51	8	8	3	17	162	77	1928	41	113	33	1	28	38	45	33	148	1	374	167	92	58	50	32	73	70	0	2	4	88	12	3	101	93	294	9	2
Flavobacteriaceae bacterium TMED204	53	1903	341	729	0	90	1	1322	240	2698	0	27	1270	231	283	0	0	346	149	561	1141	3360	2	1	709	815	1045	2747	8178	1	554	187	265	1627	1086	670	4860	3531	0	22	42	2722	245	0	122	95	461	309	83
Pelagibacteraceae bacterium TMED246	53	6758	1183	2699	0	3007	92	4878	855	9856	0	54	3942	739	872	0	0	9854	4053	1320	4415	12854	3	0	3332	3883	4714	8766	31158	0	16760	6557	5103	7588	4996	3368	23555	11959	0	118	135	15556	1827	0	3229	2683	12009	728	229
Azospirillum brasilense	53	620	112	226	1	322	4	204	37	434	15	34	279	67	81	0	19	1128	489	612	220	530	20	3	182	207	256	362	1842	4	1454	574	618	451	280	182	683	828	5	13	22	572	154	14	544	483	2473	78	13
Pyramimonas orientalis virus	53	1608	265	654	0	128	3	327	66	648	2	43	134	35	30	0	3	392	149	1299	330	1029	2	0	93	104	132	97	695	0	492	197	202	227	149	109	714	544	1	11	16	701	106	2	238	246	601	35	10
Alphaproteobacteria bacterium MarineAlpha5_Bin12	53	10347	1754	4143	1	10735	345	6511	1168	12748	3	86	6404	1302	1510	1	3	38782	16073	1476	6620	18854	7	0	6070	7141	8581	13612	65644	1	37316	14771	12272	14542	9081	6305	40392	23389	3	115	209	23788	3175	2	10040	8273	35883	490	169
Xanthomonadales bacterium	53	892	186	309	3	1386	34	263	39	545	14	19	473	89	108	3	17	4458	2095	492	307	801	20	3	204	274	312	630	2603	4	6663	2760	2872	508	323	241	810	1391	12	27	28	989	321	6	2186	1990	9452	59	16
Altibacter sp. ALE3EI	53	106	19	41	1	107	5	62	9	126	18	23	114	34	33	3	31	668	291	395	59	163	133	9	60	64	84	107	720	5	270	102	119	145	103	79	220	474	31	0	5	136	41	4	156	130	5335	17	5
Firmicutes bacterium	53	469	85	180	3	731	27	133	29	346	8	28	258	46	54	2	16	2433	1100	585	198	562	29	4	151	161	196	380	1633	13	2765	1224	1462	333	217	158	593	783	4	18	28	684	201	6	1112	1053	5121	39	14
Rhodothermaeota bacterium MED-G16	53	9656	1578	3770	1	805	28	6799	1179	13761	0	92	5111	983	1234	0	1	3964	1599	837	5714	16616	6	0	7290	8199	10215	45542	130539	1	4653	1763	3385	15107	9462	6509	178739	86487	1	77	113	22179	1826	1	591	511	2254	440	123
Ignavibacteriae bacterium	52	1005	170	397	0	1385	57	501	111	1000	12	32	615	99	132	1	7	4541	2005	774	563	1633	14	1	302	401	485	1273	4614	11	5303	2221	3354	722	511	344	2402	2430	12	25	59	1694	512	6	1705	1506	8378	65	23
Cytophagaceae bacterium FSY-15	52	117	16	36	1	60	2	51	9	105	5	23	52	13	21	1	4	254	112	591	58	151	14	0	40	69	62	112	481	2	287	135	169	103	91	53	229	299	3	3	6	151	36	3	89	71	366	12	7
Prochlorococcus sp. MED-G72	52	2548	487	1036	0	21	1	2564	468	5249	2	13	185	35	40	0	1	48	15	325	304	873	1	0	146084	173027	213512	16659	1584456	0	871	363	3519	347568	221480	151445	212598	997032	0	79	124	2223	2011	2	44	54	132	969	283
Pelagibacter phage HTVC120P	52	4	0	4	1	2	0	3	0	9	7	24	3	1	1	3	14	13	3	579	5	13	17	3	3	6	2	2	11	4	17	9	4	8	5	6	8	8	4	1	2	10	2	4	8	7	15	2	2
Candidatus Saccharibacteria bacterium 49-20	52	8	3	4	0	429	9	18	1	21	0	18	134	22	29	0	4	1185	556	76	13	40	0	0	5	3	4	9	46	0	66	26	11	11	6	3	24	23	0	0	0	70	7	0	48	33	137	2	0
Xanthomonas campestris	52	178	46	92	1	58	4	33	6	91	0	12	46	10	4	1	5	209	91	212	43	102	3	0	130	114	130	46	479	2	320	141	111	192	122	101	71	149	1	15	15	43	25	2	82	81	486	65	19
Rubinisphaera sp. JC658	52	705	139	248	4	820	24	128	12	283	9	41	377	64	73	0	10	2585	1313	830	180	453	7	3	113	132	167	85	1662	3	4707	2088	2934	280	187	143	130	1113	10	39	37	198	413	14	1270	1173	6873	18	3
Methanothrix sp.	52	62	12	29	3	67	2	34	6	44	1	36	38	13	8	1	11	176	86	844	30	94	19	3	19	37	35	31	159	9	245	94	96	49	41	21	85	82	4	2	5	63	16	7	132	106	493	11	4
Candidatus Saccharibacteria bacterium 47-87	52	3	0	1	0	461	20	3	0	6	0	27	144	30	33	0	0	1212	599	46	3	7	0	0	0	3	1	9	18	0	70	33	25	5	5	6	14	11	0	0	1	77	1	0	41	40	123	3	0
Pelagibacter phage HTVC119P	51	3	1	2	1	1	0	0	2	10	6	21	3	1	1	2	14	10	4	358	4	11	16	1	5	2	3	5	19	5	32	12	4	11	6	4	9	12	0	0	1	17	1	6	7	4	13	2	0
Chlorobi bacterium	51	343	63	139	2	310	6	161	32	338	2	32	185	48	44	0	5	1108	477	700	185	511	11	1	113	126	168	434	1533	5	1255	517	775	235	159	120	744	823	6	12	13	502	123	2	434	364	2091	30	9
Pseudomonas oceani	51	39	3	18	1	30	2	7	1	11	16	6	127	31	42	124	755	73	31	43	8	33	3505	385	221	289	320	1671	5986	25	1641	863	2816	393	290	308	541	2087	24	55	70	312	602	5	5387	5340	61726	30	12
uncultured bacterium (gcode 4)	51	103	17	28	2	54	4	44	8	85	6	37	56	10	14	3	13	218	98	592	47	177	6	2	40	59	70	83	364	5	301	108	99	121	71	63	199	194	4	0	4	132	40	7	89	82	551	9	4
Foussvirus S46C10	51	8	2	0	2	1	0	4	0	11	10	27	1	0	1	3	13	10	6	560	4	14	17	2	2	7	3	9	18	5	19	8	6	9	7	6	8	12	4	1	1	11	3	2	8	5	24	2	0
Candidatus Methylopumilus planktonicus	51	222	39	87	4	97	3	138	33	250	4	15	100	16	22	0	2	287	110	623	95	310	4	1	107	152	181	360	1090	0	413	164	175	319	206	146	548	481	0	4	1	252	69	0	149	120	506	39	8
marine actinobacterium MedAcidi-G1	51	2657	425	1069	0	7128	208	480	79	991	1	60	2822	573	671	0	1	29514	15926	861	1783	4740	3	0	15158	20321	24793	53153	235819	0	53209	24608	21704	27078	17154	11518	117763	112233	0	147	217	19005	2937	1	11694	12173	45098	11	1
Erythrobacter sp. A30-3	51	10	1	4	0	4136	113	2	1	4	26	60	1155	266	335	38	258	26935	13987	11	3	6	120	11	32	39	45	240	4402	3	1288	590	7247	37	35	24	100	3007	53	113	131	2498	878	914	6330	6355	94263	79	30
Alteromonas sp. BZK5	51	372	65	135	0	1104	41	17	1	36	1	9	129	31	32	0	2	3857	1644	163	6	15	3	0	370	457	645	1096	2124	0	1568	817	78	459	281	211	613	1689	0	35	61	200	594	0	904	800	36893	33	7
Xanthomonas oryzae	51	108	18	39	2	33	2	22	6	51	8	16	55	11	16	1	10	119	72	345	35	105	6	1	30	49	52	44	200	6	136	71	57	75	44	34	52	134	3	4	2	50	11	1	67	63	352	17	5
Chlamydia trachomatis	51	293	72	132	1	65	3	63	8	173	0	12	130	23	26	1	3	297	141	604	72	239	16	1	150	177	221	87	855	2	265	83	129	273	223	147	154	476	1	7	14	109	59	1	97	95	737	35	8
Chitinophaga pinensis	50	64	7	31	4	45	3	30	4	63	16	12	38	7	6	2	11	181	83	390	27	103	13	1	30	36	51	54	329	10	264	82	120	92	46	42	101	182	5	4	4	81	21	3	80	59	477	10	4
T4-like cyanophage sp.	50	58	6	19	0	0	0	27	2	32	5	24	3	3	0	2	5	0	1	517	12	40	5	1	14	13	16	4	24	1	0	0	0	25	14	7	18	36	2	1	1	28	3	1	0	0	2	3	0
Candidatus Saccharibacteria bacterium	50	155	33	57	3	259	5	55	10	141	7	25	154	28	38	1	7	611	294	631	62	217	10	1	56	69	71	146	545	6	388	165	188	157	103	60	254	286	2	4	6	260	62	3	145	135	728	21	7
Candidatus Marinimicrobia bacterium TMED108	50	6648	1143	2707	0	1280	47	2378	416	4967	1	55	3273	648	771	3	2	4290	1845	1232	3290	9089	4	1	1716	2137	2560	27183	35183	6	4655	1874	2839	3451	2191	1467	45968	20892	2	47	59	10890	786	1	1021	833	4787	149	46
Crocinitomicaceae bacterium TMED16	50	859	115	309	1	140	5	604	103	1239	4	37	514	101	118	0	3	519	207	509	461	1317	7	1	800	1000	1188	216	7429	1	831	366	471	1973	1324	835	549	5975	3	13	18	256	173	3	243	199	864	236	47
Magnetofaba australis	50	271	52	115	2	264	6	116	15	220	9	20	141	25	33	1	6	747	401	610	109	300	15	1	96	124	126	217	906	3	999	401	412	242	148	109	418	395	8	16	8	297	61	5	340	333	1483	22	7
Elusimicrobia bacterium	50	293	51	108	2	355	9	121	17	224	1	24	151	33	37	0	8	1088	476	535	106	354	12	0	89	119	137	177	1027	9	1514	618	790	217	118	96	397	544	1	6	12	366	88	5	508	467	2261	18	11
Candidatus Termititenax persephonae	49	101	22	51	4	45	1	35	11	74	12	30	39	4	7	0	7	106	53	725	38	106	7	0	18	26	32	45	201	0	132	56	94	52	26	14	113	88	3	4	5	117	23	0	66	54	251	8	4
Actinobacteria bacterium TMED172	49	15235	3053	6327	0	969	30	2686	414	5957	1	134	12036	2467	2952	1	4	4015	2026	1009	3189	7504	5	0	2068	2685	3098	4130	43219	0	8393	3635	3755	4260	2800	2073	4590	17475	1	433	642	14474	7420	3	1116	1119	5052	61	18
Pelagibacteraceae bacterium TMED136	49	1477	265	562	2	834	32	1025	176	2017	10	28	1053	189	221	3	10	2654	1065	773	1140	3051	11	0	724	795	926	1648	5804	2	3359	1299	936	1627	1050	693	4253	2345	5	19	27	2727	243	3	866	768	3234	168	40
Bacteroidetes bacterium ADurb.Bin234	49	50	8	15	1	27	0	33	5	79	3	33	45	7	6	0	9	121	55	774	28	96	19	2	36	45	51	33	398	4	175	59	103	53	41	38	121	228	1	2	4	44	24	0	58	45	281	8	3
Candidatus Spechtbacteria bacterium RIFCSPLOWO2_01_FULL_46_10	49	9	1	3	3	12	0	8	0	7	8	19	7	1	1	2	7	35	20	356	3	12	6	0	6	8	7	18	79	5	77	25	26	21	23	9	41	46	5	1	2	38	8	3	12	18	89	2	0
Cyanobacterium aponinum	48	68	18	27	0	30	0	29	5	48	7	7	21	5	6	0	6	144	55	220	23	63	6	3	23	33	37	70	272	0	200	87	91	69	47	19	84	134	0	1	3	48	31	0	65	49	343	6	3
Gammaproteobacteria bacterium RIFCSPHIGHO2_12_FULL_63_22	48	74	16	36	1	43	0	30	8	90	5	28	33	5	12	4	8	195	109	432	33	92	14	2	22	35	22	71	223	2	291	98	123	56	31	15	93	102	0	4	4	95	27	5	93	77	361	14	3
Bacteroidetes bacterium ADurb.BinA104	48	63	15	31	4	95	4	18	4	48	6	13	33	9	15	0	11	360	148	279	17	70	13	2	20	26	37	49	233	2	455	183	175	53	27	19	88	196	2	3	0	74	22	2	192	180	558	14	2
Paenibacillus darwinianus	48	59	13	30	3	21	0	17	4	49	4	32	15	2	3	1	1	54	20	713	15	55	3	0	18	17	25	30	94	2	65	24	38	35	28	24	71	53	2	1	1	70	5	5	23	22	125	13	2
Aureispira sp. CCB-QB1	48	271	44	106	1	156	7	135	29	250	7	35	192	39	44	1	4	718	324	685	181	469	8	0	93	121	176	124	1064	4	940	366	708	229	149	107	275	689	3	11	8	208	92	5	303	283	1732	33	8
Caulobacter phage Cr30	48	31	2	7	1	13	0	5	3	25	6	33	8	1	1	3	5	29	9	802	16	52	16	0	15	7	16	12	25	6	47	12	21	22	20	12	25	22	1	5	4	69	5	6	33	31	69	3	1
Candidatus Magnetomorum sp. HK-1	48	379	74	145	3	432	9	153	28	301	9	35	173	41	60	3	10	1372	554	740	160	423	10	3	115	129	175	293	1266	9	1662	720	929	254	143	128	601	705	5	10	17	427	114	2	598	497	2637	35	10
Candidatus Aerophobetes bacterium	48	538	99	254	0	505	18	224	41	430	2	26	278	47	66	1	6	1442	664	721	241	713	11	0	167	180	238	429	1626	5	1724	730	831	350	238	168	778	838	4	13	21	890	190	5	707	655	3122	40	15
Aeromonas veronii	48	276	64	101	1	126	4	85	15	204	1	13	113	21	31	0	11	470	221	383	96	281	13	1	129	139	183	237	830	1	601	244	267	265	167	120	286	494	2	10	15	164	55	2	304	253	1761	57	21
Blastopirellula marina	48	755	141	305	1	662	24	123	12	301	4	25	362	82	93	3	9	2190	1064	440	220	561	9	0	134	153	206	140	1720	3	3345	1434	2262	286	182	115	265	1111	0	52	73	251	566	1	1100	1033	5550	35	11
Rickettsiaceae bacterium	48	587	95	233	0	72	1	202	37	397	1	8	250	43	49	0	1	294	127	205	266	748	0	0	420	540	741	240	2167	1	233	107	88	1269	789	476	548	1775	2	7	7	220	69	0	68	75	326	46	13
Cytophagales bacterium	48	723	112	318	2	495	15	418	79	916	10	24	419	85	100	2	6	1710	663	468	406	1221	7	2	376	471	552	678	4170	2	2238	889	1150	905	577	419	1901	2575	11	18	26	921	249	3	746	571	3091	91	33
Candidatus Pelagibacter sp. RS40	48	16002	2802	6382	0	4404	162	11908	2165	24047	1	144	9687	1849	2279	0	2	14553	5873	2718	10378	30146	3	0	8093	9111	11254	20872	69116	0	23819	9247	5751	18813	11960	8036	59649	25193	0	170	277	34950	2907	0	4627	3647	15607	1863	524
Listeria monocytogenes	48	260	47	111	1	127	5	78	9	185	1	28	101	25	30	1	3	376	157	565	87	236	12	0	94	138	146	187	713	2	473	202	215	215	146	86	200	368	2	7	16	224	43	1	147	150	579	41	8
Comamonas testosteroni	48	80	18	35	2	69	1	23	7	64	7	11	36	7	8	4	6	252	122	293	22	91	15	3	27	26	38	63	276	0	295	139	147	61	30	29	70	115	3	5	9	81	25	2	124	100	593	12	4
Flexithrix dorotheae	48	399	79	154	0	295	8	197	48	478	8	21	222	44	70	1	3	1054	502	525	210	632	8	0	173	214	279	429	2039	1	1338	543	737	401	279	173	838	1281	10	7	22	546	150	4	533	427	2836	50	29
Microbacterium schleiferi	48	5	1	3	0	531	20	2	0	3	10	13	106	36	40	0	0	2214	1185	16	1	4	2	0	1	4	1	2	33	0	54	25	26	3	4	2	2	17	0	14	19	53	33	8	377	451	3486	17	7
Gammaproteobacteria bacterium TMED186	48	2702	433	1057	0	182	6	1748	309	3737	2	26	1321	276	337	0	3	683	296	480	1387	3766	1	0	10789	12507	15369	16760	124441	1	979	371	600	27957	17747	12108	22547	69963	1	16	25	1207	296	0	222	208	740	238	79
Mesorhizobium sp. B2-4-6	48	8	5	5	1	7	1	4	1	13	2	6	5	1	0	1	2	18	5	111	1	9	3	1	3	3	3	5	19	0	22	7	11	5	2	2	12	11	0	0	2	12	0	0	6	6	121	1	1
Alphaproteobacteria bacterium MarineAlpha5_Bin9	47	11324	1897	4411	0	12414	399	7138	1236	14477	0	60	7292	1405	1689	0	0	44860	18533	1022	7654	21862	3	0	6491	7714	9305	13987	74020	0	37978	14864	13087	15761	10049	6805	45163	25995	1	107	186	20431	2942	1	11003	8807	37979	645	180
Rhodopirellula sp. TMED283	47	1241	328	576	0	228	7	169	32	411	0	39	1468	282	328	2	2	1259	632	251	413	926	1	0	227	336	326	74	2012	0	1251	544	624	714	454	354	76	1253	1	25	43	69	261	0	317	289	1604	36	14
Staphylococcus aureus	47	534	105	203	1	180	5	170	20	370	5	19	218	42	49	0	3	788	345	432	128	363	8	0	171	220	261	217	1486	4	689	300	361	428	268	183	400	901	8	11	14	354	118	3	300	257	1237	34	17
Telmatospirillum sp. J64-1	47	447	104	172	1	269	4	138	25	310	17	23	180	52	67	5	15	836	352	367	162	384	20	2	129	175	205	149	1579	2	1158	437	459	408	232	176	356	767	7	8	15	299	105	12	442	406	2025	34	9
Methylococcales bacterium	46	133	27	52	1	122	5	54	10	106	6	23	66	12	21	2	6	384	178	584	56	195	12	1	57	57	90	197	483	2	536	207	231	118	85	55	239	254	2	3	5	137	43	2	171	171	782	10	3
Persephonella marina	46	54	15	20	0	51	2	28	3	53	0	13	24	4	3	0	2	137	61	254	39	79	2	0	22	24	27	50	196	0	192	81	96	65	42	30	85	123	1	2	3	81	14	2	46	62	277	5	2
Bacteroidetes bacterium MED-G13	46	5606	1024	2240	0	168	7	3957	697	7990	0	61	3407	636	806	0	1	744	326	738	2432	6925	5	0	2952	3443	4111	1179	32257	0	1511	592	984	7810	4991	3578	2852	25804	0	26	41	589	609	0	171	146	564	762	253
Alphaproteobacteria bacterium MarineAlpha5_Bin5	46	13904	2286	5592	0	7146	231	9582	1661	19143	1	96	9812	1812	2293	0	2	24865	10152	1196	10421	30239	1	0	8442	9884	12175	16705	94407	0	29459	11725	9905	20836	13296	9042	57252	32658	3	121	177	23433	3226	0	7266	5900	24822	790	223
Roseivirga spongicola	46	83	10	26	0	389	14	30	4	54	6	9	59	9	10	1	5	478	225	354	21	78	8	2	26	23	18	28	209	0	156	74	87	27	23	15	67	115	0	8	9	715	439	0	371	325	11724	155	44
Pelagibacteraceae bacterium TMED259	46	4611	776	1822	3	1006	26	2561	476	5373	1	33	3168	622	714	1	2	3801	1610	694	2597	7513	3	0	1435	1539	2183	4624	14746	1	4933	1939	1333	3618	2313	1591	10351	5642	1	34	56	7939	523	1	1024	844	3334	596	180
Candidatus Eisenbacteria bacterium	46	614	151	234	3	747	19	170	35	358	8	14	290	69	61	1	11	2495	1178	569	223	582	10	1	129	161	222	416	1742	3	3049	1274	1630	335	207	145	599	885	6	15	23	720	233	3	1202	1111	5609	37	7
beta proteobacterium CB	46	17	2	6	0	3	1	8	1	14	10	23	9	0	3	1	12	31	11	404	11	33	10	4	8	11	15	13	58	9	42	14	17	24	18	11	20	34	13	0	0	21	2	4	13	5	44	3	1
Bdellovibrio sp. ArHS	46	30	8	12	1	39	0	12	3	30	6	8	14	2	2	2	5	99	38	381	13	40	11	1	21	25	26	206	214	1	102	63	69	27	23	22	100	63	1	1	5	53	12	4	59	50	191	6	2
Xanthovirga aplysinae	46	280	44	104	0	183	6	149	26	327	4	18	164	36	31	3	7	479	217	363	156	424	3	1	94	139	158	222	1223	2	701	321	428	227	142	117	622	832	3	8	5	388	70	2	224	209	1079	29	11
Selenomonas ruminantium	46	179	30	73	0	116	7	103	16	184	3	20	111	21	22	2	7	456	211	583	100	261	17	0	66	77	103	121	642	4	526	209	237	151	119	80	324	325	3	4	5	267	53	2	203	160	802	22	2
Mycobacterium tuberculosis	46	282	93	112	0	253	2	75	8	197	7	22	153	42	35	0	9	759	382	453	105	251	24	3	113	129	141	161	765	3	950	441	416	223	126	141	199	384	10	24	20	203	57	5	376	353	2286	73	17
Anaplasma marginale	46	28	6	11	1	16	0	15	2	16	3	26	13	1	2	2	6	67	28	370	11	19	8	1	16	9	30	24	103	6	108	40	48	38	25	25	48	56	3	0	1	35	17	3	27	25	122	4	1
Ignavibacteria bacterium	45	522	95	225	0	730	28	215	41	434	14	20	289	56	60	2	3	2447	1094	589	253	733	11	3	169	205	249	726	2408	4	2847	1158	1628	364	255	165	1174	1276	8	19	20	874	269	1	1082	906	4709	47	11
Thalassobium sp.	45	109	13	47	2	165	5	43	5	101	15	14	55	12	12	3	21	500	205	381	42	124	44	3	40	48	74	174	366	4	515	276	266	75	58	38	176	168	5	11	12	237	112	10	1340	1141	8723	21	7
Pelagibacterales bacterium MED-G39	45	13035	2207	5036	0	2694	85	8675	1552	17626	0	109	8008	1514	1814	0	2	8700	3614	2288	8428	24163	3	0	21320	24638	30410	66681	160500	0	15085	5992	3725	53578	34142	23336	170912	68052	0	207	324	38218	2512	0	2974	2430	10037	2551	730
Pelagibacterales bacterium MED-G41	45	11233	1906	4502	0	2372	75	8301	1483	17208	0	95	7238	1340	1599	1	1	7288	3046	2487	8369	23858	3	0	8025	9212	11235	18520	59139	1	12722	4917	3095	19822	12461	8550	59570	23747	0	123	168	20376	1614	0	2560	2085	8481	1253	352
Aquirufa antheringensis	45	134	25	54	0	54	2	63	11	138	6	10	78	9	15	0	4	170	73	348	59	176	7	0	32	40	65	97	449	1	245	103	132	95	49	36	279	295	0	3	0	118	17	1	66	62	341	6	2
Anaerolineae bacterium	45	717	152	329	4	1249	30	252	54	610	5	42	402	92	84	1	8	3988	1853	778	333	867	13	0	208	259	309	607	2595	7	4456	1940	2230	509	331	254	1002	1224	2	20	53	1219	401	5	2163	2038	8643	66	17
Yellowstone lake phycodnavirus 1	45	68	14	25	4	14	0	19	4	51	3	20	26	2	8	1	4	44	21	707	45	125	6	1	14	13	22	22	73	1	45	30	19	44	28	14	67	54	5	2	0	76	13	4	27	26	72	12	2
Hyphomonas pacifica	45	52	14	22	0	134	4	13	1	44	159	4	68	26	15	30	179	529	265	23	28	54	59	5	13	27	27	64	346	8	269	125	229	37	37	23	55	132	136	9	19	97	90	155	1171	1166	12664	10	6
Ralstonia solanacearum	45	159	38	54	2	120	4	43	8	82	2	13	62	14	10	2	14	399	199	317	58	147	21	3	67	74	84	108	480	3	501	254	257	126	79	65	150	193	3	9	16	129	40	3	203	199	1112	28	8
Yellowstone lake phycodnavirus 2	45	187	27	68	0	8	0	38	6	93	5	28	36	2	12	1	4	27	13	914	62	195	11	0	20	19	15	18	85	1	36	22	22	41	22	19	55	47	1	3	2	69	1	2	18	15	36	4	0
Thiofilum flexile	44	189	31	67	1	135	2	79	16	173	8	25	75	22	20	1	2	422	214	692	69	192	4	0	37	62	75	176	494	1	590	224	264	128	92	54	239	258	3	4	5	210	38	2	135	152	815	23	5
Bdellovibrio sp. qaytius	44	148	19	59	0	156	6	52	9	136	7	17	73	10	21	1	3	516	247	457	62	190	11	1	106	133	173	755	972	3	633	270	318	158	86	68	458	302	1	5	8	280	39	1	461	322	1034	12	5
Enterovibrio norvegicus	44	148	34	51	0	103	2	76	11	136	10	10	96	15	17	2	8	354	146	266	69	165	3	2	58	57	77	128	606	0	482	227	211	109	80	64	216	285	2	5	5	137	40	6	167	109	970	16	6
Cylindrospermopsis raciborskii	44	184	41	83	0	147	4	96	17	193	5	24	75	19	18	0	2	500	211	597	73	189	4	0	91	116	135	104	843	1	682	262	275	229	152	89	282	483	2	4	2	137	44	3	229	186	818	24	10
Delftia virus IMEDE1	44	7	2	4	0	0	0	5	0	7	2	6	1	0	1	0	1	2	0	120	0	0	3	1	1	1	0	1	6	0	1	0	2	0	3	0	1	3	1	0	0	3	0	0	0	0	0	0	0
Reyranella massiliensis	44	88	25	41	1	44	0	34	3	54	4	10	34	7	8	2	2	198	84	194	24	71	4	0	23	23	35	24	190	3	236	98	107	61	25	32	58	121	1	1	2	78	25	3	77	78	361	10	2
Candidatus Saccharibacteria bacterium RIFCSPHIGHO2_12_FULL_49_19	44	7	1	5	1	2	0	5	0	8	8	24	3	0	0	2	3	6	3	453	1	8	4	1	1	2	1	2	10	0	7	6	3	0	1	2	2	9	1	1	1	2	2	4	5	3	8	2	3
Gilliamella apicola	44	305	62	127	0	165	6	174	27	280	4	15	164	24	36	2	5	587	263	434	158	428	7	2	113	137	198	313	1089	4	894	359	358	242	174	110	501	498	4	9	5	314	65	4	263	235	1054	38	16
Comamonadaceae bacterium	44	696	142	266	0	544	19	187	38	488	11	14	333	68	92	5	13	1877	864	443	266	635	34	4	234	315	331	378	2259	6	2540	1058	1120	441	325	256	608	1132	4	15	25	577	166	12	894	823	4588	65	27
Curtobacterium pusillum	43	25	9	9	1	14	1	8	2	16	5	18	11	5	4	0	8	86	35	320	11	19	8	1	11	8	11	6	66	0	40	25	24	15	3	7	7	20	2	3	6	20	8	3	21	31	477	8	0
Winogradskyella sp. J14-2	43	197	30	84	0	48	1	120	20	225	2	9	37	9	9	0	2	255	107	1401	46	117	4	0	128	155	172	244	1529	2	387	186	82	636	424	274	203	1021	2	5	10	356	241	1	1174	958	18256	31	11
Gimesia chilikensis	43	175	42	65	0	171	10	42	7	71	2	14	75	11	18	5	13	599	283	327	63	149	5	2	39	34	48	221	443	8	963	447	643	79	47	37	136	275	78	8	15	111	178	9	347	373	6528	37	9
Candidatus Kaiserbacteria bacterium RIFCSPLOWO2_01_FULL_54_13	43	44	7	11	4	19	2	13	4	37	2	23	14	4	2	0	2	60	23	664	24	60	3	0	12	16	17	21	93	1	55	30	18	25	14	9	55	47	1	3	3	46	4	1	35	22	101	3	2
Halomonas meridiana	43	193	46	76	317	2490	71	23	3	52	367	8	128	26	32	461	2527	2375	1170	228	13	42	9234	934	90	137	156	1051	2611	181	1778	1232	2252	501	362	311	660	1411	228	47	55	238	181	215	1656	1606	17087	34	11
Saprospirales bacterium	43	433	89	186	0	294	4	259	34	526	4	22	261	51	78	1	7	960	404	441	286	745	8	1	233	252	359	436	2393	3	1213	495	659	502	307	220	891	1513	7	15	19	459	152	5	398	365	1940	57	22
Buchnera aphidicola	43	1151	226	400	0	761	24	704	140	1353	3	16	742	128	189	1	5	2389	1045	585	745	1999	6	0	486	572	674	1444	4680	2	3384	1285	1362	1072	719	515	2735	2061	4	17	23	1712	316	2	880	774	3396	133	40
Bacteroidetes bacterium GWA2_32_17	43	92	8	45	2	119	2	55	8	112	0	13	47	7	15	3	4	332	142	430	64	178	11	1	57	69	79	71	635	4	543	177	258	128	76	45	155	377	2	3	4	103	28	4	151	142	641	11	6
Oceanospirillales bacterium TMED59	43	1640	276	674	3	137	4	626	99	1225	4	24	627	123	160	2	5	434	200	316	503	1432	4	1	381	410	571	322	3527	3	504	212	259	1305	777	540	898	1918	1	21	42	762	370	5	196	172	698	956	275
Alphaproteobacteria bacterium CG_4_9_14_3_um_filter_47_13	43	386	66	135	3	238	6	153	33	278	9	18	224	49	43	0	3	847	345	536	157	372	7	0	122	134	181	217	1103	1	783	359	302	310	177	147	442	531	3	12	11	389	116	4	396	313	1653	53	8
Pseudoalteromonas luteoviolacea	43	404	78	160	2	252	7	194	46	410	13	29	214	49	56	1	9	866	387	536	218	561	10	4	171	217	261	531	1821	6	1385	600	546	401	271	198	696	889	6	9	18	412	121	4	429	365	2796	38	9
Enterococcus faecalis	43	175	33	52	0	82	4	59	7	122	7	16	75	19	12	0	3	279	122	297	59	168	4	0	41	60	80	123	568	4	334	144	124	117	57	51	174	280	0	2	4	116	31	1	93	69	451	19	4
Flavobacteriia bacterium	43	450	74	172	3	198	9	351	51	615	17	18	308	61	74	1	10	776	327	524	256	754	19	1	255	284	367	338	2799	3	981	434	563	567	366	252	716	1800	7	10	8	407	132	8	640	489	4407	67	19
Spirochaetales bacterium	42	166	42	65	1	200	9	78	15	180	4	10	100	15	21	0	2	697	310	381	68	204	4	1	73	74	85	177	586	1	780	292	377	136	72	49	250	283	1	4	9	244	62	4	436	367	1636	19	5
Mesorhizobium sp. STM 4661	42	56	6	20	0	30	1	27	8	68	2	17	32	6	8	0	3	117	51	430	34	95	11	0	22	27	39	79	179	1	249	72	88	70	34	26	103	79	1	1	3	65	17	2	44	42	305	8	2
alpha proteobacterium HIMB114	42	3864	644	1556	2	3037	88	2592	483	5429	0	48	2775	543	626	1	7	9595	3936	1320	2881	8412	7	0	2038	2274	2823	5237	16340	5	12199	4618	3514	4677	2924	2026	13139	6477	2	52	80	8398	753	4	3195	2653	12155	489	142
Azoarcus sp. CC-YHH848	42	36	3	14	1	67	2	8	3	20	6	9	21	1	5	0	2	229	98	212	10	22	14	0	21	8	19	32	111	4	249	102	114	23	11	16	27	59	0	1	1	30	11	1	97	84	404	5	0
Candidatus Latescibacteria bacterium	42	563	93	221	0	793	28	149	23	302	5	23	297	63	65	3	13	2630	1220	375	205	557	17	2	78	110	143	329	1549	1	3599	1525	2272	216	167	108	534	838	0	13	32	548	265	4	1389	1217	6160	22	6
bacterium HD9-500m-PIT-SAG08	42	15370	2574	6069	0	960	31	10430	1822	20676	0	119	7961	1467	1864	0	4	3166	1303	2880	9301	27116	3	0	4476	5140	6471	11637	32718	0	4585	1840	1220	11161	7159	4858	32359	12977	0	126	213	22033	1568	3	1019	849	3505	1811	527
marine bacterium AO1-C	42	357	53	154	0	308	3	182	37	348	9	21	190	38	47	0	9	911	433	533	187	460	12	2	140	147	211	249	1336	2	1129	481	667	265	188	123	634	834	3	6	8	350	83	5	399	356	2051	50	7
uncultured Mediterranean phage uvDeep-CGR0-AD1-C239	42	8	0	5	0	9	0	2	0	5	1	5	0	1	0	1	3	27	9	94	0	3	5	2	0	0	2	0	2	0	33	15	20	1	0	0	1	1	3	0	0	5	0	0	38	33	88	0	0
Nitratireductor aquibiodomus	42	225	77	110	0	725	21	70	9	221	27	24	212	47	49	2	8	1902	1011	126	76	170	0	2	40	51	55	75	528	4	334	138	172	111	67	60	125	276	18	4	6	89	48	72	273	265	4677	44	12
Turneriella parva	42	151	28	64	0	122	2	47	10	114	0	2	77	17	22	1	0	382	184	98	78	195	2	0	42	54	64	150	503	0	469	172	209	97	67	42	190	289	0	4	7	174	49	1	160	171	798	11	2
Lewinellaceae bacterium SD302	42	189	36	68	2	111	3	95	15	177	6	19	83	19	15	0	2	388	152	419	89	218	2	2	71	96	96	125	778	1	474	200	244	153	81	80	277	493	4	6	7	141	51	2	184	172	898	16	6
Metabacillus litoralis	42	35	7	15	0	52	3	24	1	41	0	0	16	3	3	0	1	204	80	49	31	51	3	0	20	14	23	46	228	3	250	91	91	33	24	9	79	100	0	0	1	61	11	0	75	60	281	6	1
Enhydrobacter sp. CC-CFT640	42	498	103	211	3	359	8	133	22	276	9	16	227	53	61	1	3	1108	515	338	133	372	15	1	111	153	202	215	1400	1	1513	679	760	307	202	146	281	696	4	16	17	328	156	7	537	474	2490	37	7
Hyphomonas atlantica	42	93	15	30	2	297	6	31	8	62	746	3	50	14	10	25	112	487	251	107	40	91	151	15	268	314	348	440	1213	118	1999	1017	217	700	486	416	217	451	310	113	142	1185	971	1134	12054	11534	109457	122	39
Gemmatimonadales bacterium	42	3632	710	1462	2	5779	153	492	65	1091	15	25	1198	259	277	1	7	19894	9795	389	709	1791	19	1	345	422	466	857	6074	5	25567	11264	12629	733	448	339	1260	3323	9	40	77	3190	1063	11	10449	9892	39163	61	13
Fibrobacter succinogenes	41	270	52	109	1	216	2	105	25	212	3	20	120	24	25	0	3	653	269	387	119	321	6	2	97	133	151	204	975	1	862	359	417	252	154	97	344	514	1	10	6	290	86	3	356	275	1289	34	13
Hyphobacterium sp. CCMP332	41	354	60	126	0	190	2	182	36	382	10	10	186	46	50	0	2	742	311	292	200	546	10	1	155	150	220	367	1881	3	1017	397	492	357	200	138	876	1112	13	5	9	434	108	90	328	237	1830	50	12
uncultured Mediterranean phage uvDeep-CGR1-KM17-C101	41	0	0	0	0	0	1	2	0	0	0	14	0	0	0	9	34	3	1	368	1	0	22	2	0	3	4	3	8	21	12	3	5	10	8	3	1	9	8	0	1	1	0	9	3	0	1	1	0
Sediminitomix flava	41	314	53	124	5	140	1	157	26	285	7	33	192	37	30	0	8	519	224	801	148	408	16	0	126	164	200	252	1472	11	612	282	386	280	173	132	634	929	6	6	8	313	84	4	211	159	1012	22	9
uncultured Clostridium sp.	41	142	24	53	0	122	3	72	9	120	4	17	90	11	15	1	3	324	132	441	62	157	3	2	52	40	66	126	404	3	428	184	216	91	59	44	180	205	1	5	0	164	47	4	148	130	665	12	4
Synechococcus T7-like virus oc43	41	2	2	2	0	0	0	2	0	4	4	8	3	1	0	1	6	1	0	166	0	4	6	1	0	0	0	0	0	0	0	0	0	0	0	0	0	0	0	0	0	3	2	1	0	0	0	2	0
Synechococcus phage S-CAM4	41	53	6	14	1	0	0	21	4	29	7	14	8	4	2	1	7	3	3	564	11	36	5	0	4	9	9	6	9	3	5	1	4	13	8	1	11	8	2	2	0	16	1	1	2	1	2	4	1
Pseudomonas putida	41	258	46	114	4	179	3	92	12	189	15	15	137	29	33	4	28	545	253	398	104	249	82	8	83	126	173	247	1137	4	754	334	822	221	130	106	278	462	12	7	19	227	99	7	441	451	4245	35	11
Elusimicrobia bacterium CG22_combo_CG10-13_8_21_14_all_63_91	41	131	10	54	2	0	0	36	8	72	3	8	37	1	8	0	2	5	4	283	17	66	9	0	6	4	6	7	40	1	16	4	6	5	9	8	6	25	0	1	3	13	4	1	2	3	17	9	1
Bacteroidetes bacterium RIFCSPLOWO2_12_FULL_35_15	41	291	56	121	2	186	11	190	43	442	9	29	196	33	48	3	8	633	272	579	203	593	22	2	207	243	318	134	2079	3	1150	462	589	467	300	209	287	1526	4	11	15	139	85	3	354	301	1418	54	23
Candidatus Magnetoglobus multicellularis	40	263	52	114	2	286	5	89	21	220	6	23	95	25	27	0	9	881	379	529	108	294	8	1	81	74	105	173	840	1	1124	476	586	151	96	63	332	467	4	4	7	233	73	0	378	356	1774	23	4
Pelagibacteraceae bacterium GOM-A2	40	16084	2678	6341	0	1746	58	11324	2097	23577	2	73	8334	1561	1930	0	2	5651	2466	1689	8761	25842	2	0	3430	3898	4886	9214	30914	0	8762	3397	2196	8097	5203	3576	24884	12055	0	144	250	24573	2418	0	1834	1469	5849	2618	786
Candidatus Thermofonsia Clade 2 bacterium	40	299	63	121	0	408	11	114	22	243	4	17	156	41	36	0	6	1340	648	377	121	349	11	0	84	112	155	235	930	1	1496	645	777	194	149	111	365	528	3	12	15	469	179	5	747	678	3025	22	8
cyanobiont of Ornithocercus magnificus	40	350	64	148	2	26	0	161	23	298	8	12	217	59	54	1	10	101	40	468	72	167	20	1	150	156	232	42	1169	1	64	28	32	404	269	171	112	910	0	37	62	191	970	1	18	19	129	31	7
Acidimicrobiaceae bacterium TMED77	40	9044	1456	3585	1	539	21	2767	481	5704	0	58	2946	559	692	1	1	2226	1002	763	2719	7416	2	0	1743	2292	2816	17607	38983	0	3045	1365	1698	3421	2043	1520	27357	19968	1	67	111	11733	1182	0	680	598	2824	78	20
Geobacter sp. SVR	40	70	9	30	3	75	3	26	3	50	5	14	38	4	6	1	7	233	94	333	31	74	6	0	18	25	29	45	189	4	343	159	143	37	22	15	70	109	0	1	2	52	24	3	140	112	555	9	1
Fadolivirus 1	40	182	30	56	2	59	3	102	11	176	3	26	78	11	15	0	7	226	110	631	127	308	4	0	65	78	105	62	392	4	319	110	131	157	103	69	274	256	1	8	11	271	73	4	128	114	421	31	5
Desulfatibacillum aliphaticivorans	40	86	18	26	1	99	1	35	4	74	4	7	45	10	9	0	5	232	113	317	34	101	6	1	29	43	45	78	296	2	386	145	153	72	41	37	115	133	1	4	3	58	25	6	114	101	544	11	1
Flavobacteriaceae bacterium TMED220	40	949	178	443	0	84	6	601	102	1268	0	15	844	198	194	0	1	280	120	305	622	1794	2	0	523	687	798	2728	8224	0	549	236	283	1305	863	594	6542	3800	2	7	14	1841	262	1	87	77	353	90	30
Endozoicomonas atrinae	40	114	23	44	3	78	2	49	11	108	3	15	62	10	12	4	10	246	128	354	44	148	8	1	33	40	55	72	343	6	354	146	122	62	51	38	114	170	2	2	6	109	38	3	100	77	402	16	3
Planctomycetia bacterium TMED53	40	250	39	95	1	293	11	61	13	120	6	45	86	17	23	1	14	1068	547	1010	76	192	14	0	61	80	100	152	614	3	1348	559	660	145	96	71	185	299	5	18	15	172	74	3	439	405	1967	36	5
uncultured DHVE6 group euryarchaeote	40	31	2	14	7	48	1	17	3	48	2	39	22	5	6	0	5	152	76	1098	21	73	7	0	23	21	44	35	124	2	630	242	339	38	28	21	71	59	1	1	1	70	12	4	71	65	181	5	2
Rhodovulum sulfidophilum	40	260	54	91	2	96	6	92	15	178	27	22	152	24	30	2	20	371	177	407	83	237	41	0	70	102	153	127	1042	11	443	220	212	245	159	95	182	442	9	6	8	173	55	9	198	173	1919	31	9
Herbaspirillum sp. RV1423	40	27	11	11	0	27	0	12	3	27	7	4	20	0	3	0	3	79	37	223	10	24	3	1	28	35	38	26	154	0	122	49	46	67	41	32	50	116	0	0	2	34	10	6	35	29	213	4	4
Vibrio phage CHOED	40	2	0	0	3	0	0	2	0	1	5	10	0	1	0	1	19	4	0	433	2	1	21	2	2	3	2	2	6	10	11	4	2	6	5	1	2	6	6	0	0	6	0	2	1	2	6	0	2
Pelagibacteraceae bacterium TMED13	40	3622	587	1371	0	288	15	2295	420	4419	0	27	3428	639	778	0	0	810	374	349	3958	11478	1	0	1412	1561	1978	1037	13372	1	854	341	305	3841	2371	1671	4381	5772	1	47	91	1846	1400	0	300	258	1044	732	210
Pyruvatibacter mobilis	40	631	113	244	1	181	1	268	42	530	19	21	274	46	78	1	8	492	233	348	257	756	14	3	183	231	261	519	1858	0	743	307	312	504	303	224	618	810	3	9	11	694	116	2	215	237	1125	42	13
Tenacibaculum sp. KUL118	40	45	12	21	0	83	5	3	2	14	0	8	24	5	12	0	1	478	224	30	6	21	0	1	110	160	172	501	487	0	516	275	18	181	108	82	449	546	0	8	14	58	140	1	216	185	10975	8	4
Candidatus Pelagibacter sp. IMCC9063	40	4593	781	1733	1	4024	125	2882	531	5923	4	53	2746	490	653	0	3	12189	5203	1459	2807	7948	8	1	2093	2346	3065	5919	17659	4	18321	7470	4916	4905	3304	2247	14137	6823	3	40	103	9938	846	0	4426	3625	15861	513	139
Deltaproteobacteria bacterium HGW-Deltaproteobacteria-14	40	803	214	331	1	371	9	151	24	412	2	17	312	84	83	0	6	1391	725	271	158	441	2	0	78	102	107	87	1058	1	1844	847	1094	161	94	88	105	620	1	28	39	113	187	1	490	456	2723	45	11
Arcobacter sp.	40	254	52	100	1	309	8	122	17	264	2	20	159	37	34	1	8	1021	384	555	145	423	10	1	144	156	188	283	1273	1	1603	593	788	334	190	151	710	696	1	6	10	321	93	2	420	370	1611	23	7
Sphingobium yanoikuyae	39	40	12	14	2	338	13	8	4	37	13	10	145	35	42	2	9	1206	614	185	17	48	12	2	17	10	10	58	218	1	156	75	361	29	13	13	37	126	2	25	39	234	106	10	1465	1399	10669	12	1
Nitrospirales bacterium	39	60	16	21	3	220	7	31	3	70	8	19	39	6	6	2	7	967	453	479	28	102	6	0	29	39	44	59	251	5	821	344	439	53	39	30	100	114	4	2	5	109	29	5	233	204	1103	11	3
Organic Lake phycodnavirus 1	39	242	45	93	0	92	3	118	22	271	0	45	113	28	34	1	8	245	113	1473	222	610	6	0	145	170	206	243	728	1	377	131	152	355	204	141	933	591	2	8	6	604	79	1	172	134	474	95	26
Sulfurimicrobium lacus	39	71	15	32	0	53	1	32	5	85	6	8	22	6	11	2	2	182	69	173	34	85	4	2	39	28	42	75	242	2	273	104	108	74	35	33	81	92	0	2	0	58	14	0	69	86	366	4	7
Herbaspirillum huttiense	39	12	5	5	0	15	0	5	1	18	2	1	9	1	2	0	0	46	30	40	2	9	1	0	2	6	10	8	45	1	75	29	43	16	1	10	12	23	0	0	1	9	5	2	31	38	249	2	1
Mimivirus LCMiAC01	39	106	28	48	3	36	0	51	7	109	4	16	52	5	7	0	7	130	44	711	78	248	12	2	43	63	72	37	284	6	204	64	80	121	67	63	173	188	0	7	4	174	24	2	72	69	211	17	5
Pedobacter glucosidilyticus	39	63	17	33	1	25	1	39	5	69	4	21	30	9	9	0	5	94	31	480	25	68	6	2	30	36	44	46	244	2	119	44	81	54	33	33	98	137	1	1	3	59	17	3	54	46	266	5	3
Cyanophage S-RIM12	39	42	4	16	0	1	0	15	2	26	8	60	19	4	3	0	7	7	1	1302	24	86	11	1	4	12	20	15	35	1	8	3	2	29	20	14	20	17	1	4	4	24	5	0	1	4	4	2	0
Leptolyngbya sp. FACHB-261	39	124	33	47	0	92	6	35	2	94	3	8	60	11	12	1	6	329	157	285	56	126	3	0	87	134	158	54	533	0	345	143	178	379	238	172	104	405	1	4	6	84	53	2	134	110	555	17	6
Pelagibacter phage HTVC111P	39	1	1	1	1	0	0	1	0	2	3	10	1	0	1	1	3	2	1	313	1	3	12	0	4	2	9	5	13	0	12	3	6	4	4	1	7	4	5	0	3	4	1	3	1	0	3	1	0
Spirochaetes bacterium GWB1_59_5	39	48	10	15	2	36	0	11	3	20	7	18	20	4	5	3	10	99	47	322	16	60	15	0	10	13	12	17	95	8	159	48	77	21	8	7	27	54	3	3	5	49	14	4	43	44	223	4	2
Candidatus Moranbacteria bacterium CG_4_8_14_3_um_filter_34_16	39	4	0	2	1	2	0	5	0	7	5	26	2	0	1	2	2	9	3	484	5	20	6	0	3	10	7	5	30	2	13	7	9	25	13	10	28	13	4	2	2	23	2	1	11	12	28	0	1
Ostreococcus lucimarinus virus 7	38	352	60	138	0	2	0	99	19	217	4	124	92	13	22	1	13	15	1	3728	298	746	10	2	21	17	11	7	39	0	5	2	0	36	20	14	39	33	0	2	0	11	0	1	2	1	6	0	0
Parcubacteria group bacterium GW2011_GWA1_47_11	38	16	2	7	3	8	0	9	3	12	5	13	4	1	1	1	5	35	14	269	12	16	4	1	6	3	5	15	41	1	61	23	15	15	7	6	25	23	0	0	1	16	0	1	18	14	63	1	1
Burkholderia vietnamiensis	38	57	20	19	1	59	2	17	3	46	6	17	26	8	8	1	6	190	69	304	24	67	21	1	17	23	30	23	140	5	199	77	100	45	36	24	36	58	7	4	5	42	11	7	94	102	394	14	3
Chryseobacterium vrystaatense	38	19	2	10	1	5	1	8	1	17	4	27	12	1	2	2	5	19	15	525	15	34	11	1	5	21	25	19	63	3	21	9	10	30	13	10	25	49	1	2	3	17	4	3	11	7	55	5	0
Desulfuromonas sp.	38	749	165	340	1	787	29	286	41	628	7	20	378	72	104	5	2	2678	1250	465	281	879	16	1	227	265	322	591	2519	2	3610	1478	1809	487	284	225	850	1262	7	24	34	775	276	1	1210	1024	5677	62	17
Rhizobacter sp. Root1221	38	33	5	8	0	45	0	16	2	21	3	5	7	0	4	1	6	87	51	237	10	23	7	4	9	14	10	40	115	4	172	76	82	42	24	21	37	41	1	4	2	28	16	4	61	61	264	6	0
Blastochloris viridis	38	97	15	48	1	51	4	49	12	102	6	16	60	9	8	0	3	187	86	321	53	123	5	0	46	58	77	119	493	4	235	102	112	109	85	51	220	236	2	5	6	117	32	9	85	100	464	12	4
Freshwater phage uvFW-CGR-AMD-COM-C429	38	8	1	2	0	1	0	3	1	6	5	9	2	0	1	1	7	20	4	424	1	9	12	1	0	3	2	5	14	9	28	14	11	9	5	3	4	12	2	1	3	16	3	0	7	3	18	2	0
Azospirillum sp. 51_20	38	73	10	15	6	18	0	41	7	78	7	11	44	8	13	0	6	120	33	217	40	121	4	0	22	41	34	50	284	1	104	40	47	68	57	34	138	151	2	2	1	68	13	1	40	32	174	16	4
Archaeoglobales archaeon	38	71	11	35	0	136	4	30	6	65	2	20	40	7	9	2	8	388	191	492	44	116	4	2	35	64	69	82	361	1	447	166	200	73	59	39	196	203	2	5	5	137	42	3	210	164	728	13	2
Comamonas thiooxydans	38	38	10	16	0	22	0	9	2	19	2	12	20	1	4	2	11	82	43	248	7	21	23	0	23	20	18	16	91	1	93	40	42	38	24	25	25	58	0	2	1	26	15	5	37	30	201	8	3
Pectinatus frisingensis	38	63	14	24	0	45	4	31	5	55	4	19	28	10	7	0	8	178	53	319	25	79	13	0	25	26	36	69	267	5	192	86	90	60	44	32	186	132	2	4	2	67	16	6	62	63	296	7	0
Vibrio phage 1.123.O._10N.286.48.F3	38	12	0	1	0	0	0	2	0	8	3	4	0	0	0	0	2	0	0	122	0	1	3	1	0	0	0	1	0	0	0	1	0	0	0	1	0	1	0	0	2	1	1	2	0	0	1	0	0
Microbacterium arborescens	37	331	78	130	0	23	1	54	9	155	0	16	103	19	28	0	0	136	64	442	87	214	0	0	148	225	242	18	611	0	73	41	29	377	259	183	29	375	0	16	23	49	19	2	58	50	143	29	9
Candidatus Scalindua rubra	37	285	57	93	1	716	24	124	19	266	2	26	282	55	57	1	5	2243	962	515	146	374	8	1	96	130	138	291	1269	1	2556	1018	1412	195	163	103	715	662	2	10	15	382	102	0	1100	870	4164	38	9
Leeuwenhoekiella blandensis	37	48	7	21	23	7841	266	28	7	64	99	155	3125	614	671	1234	6905	35790	15581	112	29	68	3232	294	310	401	496	7340	1830	92	10356	5240	1717	3018	1960	1309	4917	2720	128	33	47	2923	852	82	2272	1880	81360	65	20
Candidatus Planktophila versatilis	37	88	8	32	1	23	2	49	4	84	2	46	31	4	7	0	4	88	40	893	46	105	7	1	33	39	57	60	292	1	136	54	54	99	51	50	117	156	3	2	3	65	21	0	47	41	178	3	3
Spirochaetaceae bacterium	37	863	179	401	1	894	24	346	64	761	7	33	481	85	125	0	11	2890	1335	552	360	1012	13	2	238	294	334	582	2698	4	3323	1393	1863	541	361	264	1030	1421	2	25	38	1074	366	3	1399	1300	6422	86	13
Albimonas pacifica	37	309	144	143	0	706	20	95	17	209	31	9	207	46	55	1	2	2199	1255	154	89	231	17	3	96	104	135	172	957	3	1157	637	405	202	147	120	247	459	12	83	94	508	649	41	2030	2093	78310	156	34
Ignavibacteriae bacterium HGW-Ignavibacteriae-4	37	134	20	51	1	164	4	66	11	128	3	16	91	16	16	0	6	525	245	390	76	215	10	0	67	75	84	151	661	2	580	246	386	168	102	90	252	363	0	3	1	200	68	1	199	176	1046	17	4
Synechococcus sp. PCC 7502	37	109	17	44	1	39	3	25	3	72	3	4	33	9	9	0	0	137	77	164	33	95	6	0	55	59	87	57	296	1	177	93	100	131	101	70	80	205	0	3	7	72	44	0	42	55	253	10	1
Alteromonas oceani	37	1109	223	484	0	2378	83	18	2	53	0	13	507	98	114	0	2	2808	1295	58	24	81	5	0	794	988	1105	2081	9499	0	2019	3574	916	2714	1712	1276	1327	6318	1	544	865	729	2016	0	8641	7793	38695	986	295
Synechococcus sp. TAK9802	37	4710	1211	1893	0	50	0	1123	159	3001	1	56	4520	954	1074	1	9	194	100	530	1519	3441	14	3	250	324	359	31	1836	0	32	18	25	607	391	317	47	1588	0	6	9	79	84	1	23	16	47	52	14
Planctomycetes bacterium SRT547	37	406	73	168	1	390	7	140	20	309	0	16	204	46	53	0	6	1230	550	476	161	456	6	0	173	181	178	300	1490	1	1486	614	784	279	201	152	471	868	1	8	19	400	159	4	538	453	2526	42	10
Stella sp. ATCC 35155	37	317	65	126	1	198	6	87	13	181	10	21	124	24	28	1	4	682	312	519	109	260	12	0	85	106	150	96	1015	4	872	352	479	223	143	92	190	498	6	6	13	203	95	5	343	343	1903	25	6
Devosia epidermidihirudinis	37	67	9	28	2	48	1	42	6	72	4	19	35	5	6	1	9	114	57	668	44	107	8	0	38	46	59	47	388	4	162	57	87	82	84	46	138	177	0	3	2	69	20	5	74	64	340	7	3
Alteromonas sp. RKMC-009	37	149	24	56	0	162	6	39	9	71	0	2	71	10	16	0	1	587	287	174	28	71	1	0	148	179	202	211	896	0	852	432	110	218	138	105	166	1109	0	6	21	95	133	0	335	305	12061	13	5
Cellvibrionales bacterium TMED148	37	2532	400	1003	0	249	4	810	119	1636	5	35	783	149	204	1	8	836	374	1196	641	1841	19	0	712	945	1126	1111	8114	8	1365	620	597	1921	1263	821	1389	4761	9	63	98	1083	749	7	383	304	1373	689	190
Lignipirellula cremea	37	1358	262	493	0	1450	44	173	25	427	9	27	636	136	149	3	16	4442	2194	605	342	899	9	3	193	267	264	79	2877	6	7220	3223	4991	495	301	223	135	2006	5	95	146	203	1209	7	2154	2099	11647	21	2
Elusimicrobia bacterium GWB2_63_22	37	37	4	19	0	12	1	19	2	28	1	9	18	2	2	1	4	74	25	222	15	39	7	0	4	12	8	33	100	2	81	32	33	27	16	9	35	53	1	0	1	21	4	0	28	28	118	1	0
Blattabacterium cuenoti	37	684	86	268	0	407	16	433	104	970	3	31	456	105	94	0	6	1346	556	569	484	1338	3	0	424	479	587	776	4237	2	1732	681	854	957	634	399	2138	2462	0	13	23	987	273	0	519	412	2012	70	24
Acidimicrobiaceae bacterium TMED210	37	25493	4100	9935	1	144	2	12757	2237	25791	0	225	16950	3136	3962	1	2	479	224	6620	16018	45575	2	3	2306	2847	3391	21778	12781	0	115	53	45	5060	3277	2146	27128	7045	0	97	160	21534	504	0	59	52	96	530	151
Chryseobacterium indologenes	37	42	9	21	2	12	1	16	3	59	7	10	23	10	4	1	6	71	22	327	24	74	9	2	25	25	35	17	192	5	67	29	37	46	44	17	70	85	2	4	2	94	21	1	37	41	279	13	2
Faecalibacterium prausnitzii	36	71	11	22	0	76	0	23	5	39	6	9	34	11	7	3	1	225	114	201	30	85	7	2	29	34	40	43	236	2	264	110	127	65	22	29	76	112	0	1	3	59	17	4	145	98	456	8	3
Edafosvirus sp.	36	135	26	55	0	36	0	55	8	119	2	18	48	11	16	1	2	135	56	609	76	195	1	0	37	63	63	41	272	2	155	63	57	94	66	54	210	180	2	2	11	153	32	1	90	85	239	20	7
Moraxellaceae bacterium	36	564	120	242	1	398	7	203	41	453	2	19	316	56	64	0	4	1307	610	492	225	639	10	2	168	215	221	483	1944	3	1931	804	866	394	258	209	693	912	4	17	15	457	143	3	606	486	2426	46	15
Synechococcus virus Syn19	36	65	6	19	2	2	0	21	1	32	5	121	26	0	2	3	17	10	7	3387	61	192	26	4	5	6	5	4	10	0	1	2	0	16	1	2	2	9	0	1	3	19	1	2	3	1	3	2	0
Firmicutes bacterium ADurb.Bin506	36	20	4	6	1	38	1	8	4	16	7	20	15	1	5	1	10	137	58	370	9	31	17	0	12	10	14	18	75	0	163	74	73	29	5	8	37	29	1	0	0	63	17	5	75	53	230	1	0
Candidatus Hydrogenedentes bacterium	36	483	90	214	4	531	19	178	35	364	6	18	269	43	62	0	9	1917	921	414	225	555	9	0	154	148	213	377	1668	5	2406	1067	1275	382	228	178	571	815	1	15	16	550	188	7	908	872	4094	39	8
Puniceicoccaceae bacterium	36	1568	307	664	3	453	17	395	48	831	6	25	635	141	177	2	9	1442	703	362	500	1246	16	0	158	215	212	253	2040	3	2188	934	1153	364	230	185	425	1229	4	35	54	471	325	5	839	760	3952	351	84
Klosneuvirus KNV1	36	196	42	88	0	52	2	67	17	147	3	18	58	11	25	0	3	174	86	570	98	305	6	0	90	89	107	71	446	1	252	101	81	177	132	99	241	236	1	4	9	221	48	1	81	78	291	28	10
Qipengyuania pelagi	36	19	4	11	2	1324	39	7	3	16	4	18	396	90	101	2	16	5763	3076	25	6	19	20	4	5	15	7	94	2288	0	3789	1909	1071	31	14	22	41	299	2	241	270	405	806	80	3175	3197	31362	7	2
Acidimicrobiales bacterium	36	4863	968	1996	1	3136	103	990	160	2171	12	70	4631	864	1074	1	4	13070	6872	818	1673	4090	27	2	2311	3200	3710	5623	53565	3	27566	12491	12215	4174	2801	2109	6759	17351	11	178	280	11813	4066	4	4752	4801	19327	82	33
Synechococcus sp. SYN20	36	203	37	94	2	18	0	57	9	128	0	11	101	20	16	3	6	50	24	344	31	82	10	2	169	235	283	52	1356	2	523	206	57	478	343	270	33	1165	3	7	8	27	102	3	19	11	73	10	2
Waddlia chondrophila	36	125	18	43	0	103	2	54	11	113	5	26	61	9	18	3	7	345	149	535	48	150	8	0	41	53	83	79	422	3	413	182	211	142	66	58	156	211	1	3	3	161	32	1	179	142	791	8	4
Alteromonas marina	36	181	24	73	0	245	4	3	0	12	0	4	47	8	6	0	0	755	285	73	5	7	2	0	141	206	264	364	568	0	675	336	49	149	94	62	195	508	0	34	41	128	558	0	618	498	31018	12	3
Cryomorphaceae bacterium BACL11 MAG-121015-bin20	36	1053	167	477	0	586	14	814	137	1602	0	22	672	137	171	1	1	1822	766	384	935	2677	2	0	1100	1285	1541	170	11213	0	5575	2198	2779	2109	1402	900	697	7049	0	17	16	76	200	1	1843	1427	4445	67	23
Synechococcus sp. RS9907	36	4062	1161	1763	0	48	3	954	116	2570	3	45	3305	738	855	0	12	151	81	706	1116	2545	18	2	268	381	379	29	2064	1	36	13	18	688	468	324	41	1770	0	10	6	97	79	1	21	20	60	66	8
Brucella sp. 10RB9210	36	4	2	1	1	2	0	1	2	1	2	23	1	1	0	2	11	3	4	229	1	2	8	1	1	2	2	3	5	1	3	3	1	6	5	1	6	11	1	0	0	4	0	4	5	2	10	0	0
Geobacter sp.	36	158	33	66	3	287	9	78	12	151	6	13	85	10	15	2	1	880	396	304	71	194	15	0	59	71	74	113	644	4	1242	553	540	119	82	55	208	348	2	2	6	182	80	2	456	412	1741	24	5
Polynucleobacter sp. 39-45-136	36	45	8	6	1	19	1	15	2	35	5	15	16	0	1	1	4	60	25	311	21	55	6	1	13	20	22	24	144	4	72	43	47	28	18	12	47	65	3	0	2	30	10	5	41	17	115	2	2
Flavobacterium piscinae	36	53	8	26	0	25	1	36	8	67	4	14	40	7	7	2	4	96	48	347	29	87	7	1	35	26	31	38	263	3	129	56	85	54	29	24	106	145	0	0	2	47	14	0	53	42	521	5	0
Priestia megaterium	36	163	26	55	0	151	5	77	20	130	5	21	86	13	10	0	6	434	189	558	73	203	13	1	74	72	97	167	768	2	623	242	268	160	95	65	393	394	2	3	10	218	58	2	215	191	802	18	5
Gemmataceae bacterium	36	228	65	75	1	208	5	51	7	108	3	15	111	35	25	0	9	667	324	370	81	193	6	1	42	66	69	61	557	3	976	462	583	95	70	55	108	342	3	6	17	93	107	5	339	310	1644	13	1
Marine Group II euryarchaeote MED-G36	36	3905	679	1664	1	83	3	716	128	1473	0	35	1952	416	451	0	2	417	215	560	1134	2998	3	0	307	467	564	1135	8978	2	2062	848	1068	631	412	302	1067	4873	1	13	23	395	246	0	79	76	388	6	2
Freshwater phage uvFW-CGR-AMD-COM-C203	36	6	1	3	1	1	0	4	0	7	5	14	1	1	0	2	5	17	6	430	7	14	10	2	3	4	4	7	11	3	31	8	4	4	5	7	13	7	2	0	1	11	1	1	6	7	39	1	0
Magnetospirillum magneticum	35	126	31	33	1	78	2	38	7	85	6	16	52	5	10	0	3	262	117	406	54	122	5	2	44	53	64	82	418	10	367	152	165	94	63	39	160	210	1	1	4	110	25	1	124	115	584	14	2
Candidatus Fermentibacteria bacterium	35	195	23	90	2	198	3	74	18	172	5	25	87	12	30	2	8	649	274	430	80	236	8	0	72	54	86	165	677	7	756	270	420	129	83	58	276	285	1	4	4	192	51	1	280	231	1190	10	3
Bacillus toyonensis	35	25	9	9	1	24	0	12	0	18	6	8	15	2	10	0	7	111	45	295	17	45	12	0	14	17	21	37	125	4	104	32	50	28	18	11	64	57	4	1	2	53	12	6	37	47	151	7	1
Desulfovibrio desulfuricans	35	47	21	22	3	79	6	14	2	57	0	10	18	8	7	0	4	235	120	272	12	63	6	0	18	28	26	25	188	1	253	135	156	42	34	21	50	104	0	5	4	48	16	2	119	106	533	4	2
Paenibacillus xylanexedens	35	61	10	29	0	39	3	37	7	61	0	12	24	7	8	1	4	125	52	174	34	90	5	0	42	42	70	20	220	4	158	56	54	84	64	51	56	89	2	6	3	66	18	3	58	45	418	36	8
Variovorax paradoxus	35	127	29	51	1	124	1	51	5	76	16	14	78	19	17	0	7	425	163	336	58	138	18	4	56	61	74	86	482	4	522	234	274	109	73	46	95	253	3	24	14	148	85	5	644	658	4908	19	6
Nocardioides marinus	35	22	5	6	1	458	15	6	2	7	9	1	97	16	24	1	6	944	565	11	7	16	24	3	6	5	4	23	62	1	338	157	101	6	8	3	19	30	2	21	14	111	301	22	2545	2739	112219	38	10
Citrobacter freundii	35	134	20	36	0	83	2	68	10	132	3	13	67	12	14	0	10	248	117	395	59	160	9	0	57	82	91	102	536	1	355	147	167	123	94	61	202	327	0	7	6	125	40	0	120	110	633	17	7
Caldithrix sp. RBG_13_44_9	35	128	27	46	2	185	5	59	8	127	3	11	67	15	18	0	2	512	235	339	75	182	5	1	37	38	47	162	472	0	563	256	432	86	49	26	269	244	3	5	9	233	42	3	216	171	979	12	2
Flammeovirgaceae bacterium TMED290	35	6210	998	2383	0	532	24	4469	820	9046	0	49	2794	524	681	0	2	2465	1044	548	3309	9350	2	1	1200	1356	1732	10371	20190	0	2903	1208	1933	2671	1649	1120	20199	12611	1	55	83	9559	861	0	480	384	1566	766	221
Janthinobacterium sp. HH106	35	4	0	2	1	1	0	1	0	5	4	15	2	0	0	3	29	4	4	369	1	7	16	2	3	4	2	1	12	6	13	9	4	9	5	2	1	10	3	0	1	2	0	3	4	5	13	2	0
aff. Roholtiella sp. LEGE 12411	35	43	9	14	2	17	0	16	3	32	1	15	5	1	1	0	0	49	27	448	14	41	1	1	14	11	17	7	81	1	64	28	25	20	17	17	30	41	1	0	3	32	13	3	25	25	112	10	2
Pelagibius litoralis	35	816	183	293	2	547	15	284	41	576	13	15	410	76	89	2	7	1890	876	241	282	765	20	3	270	302	392	372	3171	6	2558	1028	1034	654	433	254	743	1526	14	13	20	534	217	23	984	872	4441	70	15
Pirellula sp. SH-Sr6A	34	332	57	134	2	246	9	78	11	152	5	14	147	42	51	1	6	822	387	456	112	239	10	1	59	68	100	64	805	4	1188	494	768	124	95	53	118	533	0	24	27	117	249	2	391	365	1885	11	4
Proteobacteria bacterium SG_bin7	34	175	39	52	1	168	7	88	15	149	4	15	90	16	21	2	5	502	212	354	87	223	12	0	128	178	233	1565	1446	6	497	250	239	232	147	103	705	393	1	3	11	353	68	1	626	575	1227	19	3
Sandaracinaceae bacterium	34	642	178	266	1	447	12	135	18	262	199	27	357	84	92	2	12	1720	934	198	155	377	70	6	84	99	125	113	1032	108	1290	533	781	163	120	95	147	680	2876	35	43	198	695	35	596	546	42922	38	11
Dethiosulfovibrio salsuginis	34	30	4	15	1	29	1	9	2	34	7	5	17	2	6	2	2	114	41	129	15	39	6	1	18	19	27	44	170	0	169	67	78	33	26	10	85	86	0	1	4	50	17	1	59	48	258	4	1
Aeromonas virus Ahp1	34	22	1	8	1	2	0	8	2	14	5	12	1	1	1	2	7	7	7	471	7	15	7	0	11	12	5	17	18	1	33	9	7	14	11	11	5	14	3	0	0	18	1	3	12	11	34	1	1
Aureococcus anophagefferens virus	34	471	89	170	0	53	0	244	53	470	2	44	137	26	39	0	4	184	79	865	270	772	3	0	1043	1137	1435	735	2594	0	201	108	105	1804	1270	817	6498	3050	1	5	10	307	44	0	121	82	285	19	5
Rhizobiales bacterium TMED28	34	5843	986	2295	0	170	7	2097	398	4496	0	29	2521	510	601	0	0	469	245	352	2077	5837	0	0	1646	1902	2421	4976	21315	0	691	250	328	3989	2497	1724	8636	9725	0	55	97	7103	1002	0	201	150	718	487	144
Erythrobacter sp. SAORIC-644	34	6	2	3	0	2248	72	1	0	3	30	24	529	98	123	20	100	12080	6080	12	0	6	94	9	37	47	47	155	2084	2	831	382	2324	53	34	49	56	1214	66	78	122	1323	479	810	5849	5767	53976	46	11
Leptolyngbya sp. PCC 7375	34	117	28	35	1	54	3	40	4	63	0	4	56	9	13	0	5	174	63	203	41	110	8	1	69	96	108	52	372	0	240	96	109	304	183	125	86	236	1	2	3	70	40	1	132	101	516	27	2
Prochlorococcus sp. HOT212_60m_823D04	34	2411	400	927	0	23	1	2718	469	5426	0	7	179	26	34	0	0	22	6	52	282	842	0	0	133	137	170	20	1511	0	3	1	10	289	212	143	167	1000	0	38	39	819	633	0	21	10	66	417	128
Alteromonas alba	34	827	182	314	1	1595	52	19	5	44	1	23	319	51	73	0	2	1755	803	86	15	47	1	0	562	767	896	1296	6455	0	1109	2100	500	1535	1005	767	921	4328	0	293	440	455	1301	0	5097	4568	31430	709	194
Cyanobacteria bacterium J083	34	76	17	29	0	34	0	33	3	52	2	9	30	4	8	2	5	123	59	199	39	90	4	0	66	83	98	42	367	0	136	52	56	215	131	88	74	228	1	2	4	29	52	0	41	34	185	14	3
Halomonas qijiaojingensis	34	42	14	16	1	49	0	18	4	29	7	9	28	5	6	2	12	148	78	216	21	55	17	4	23	18	21	19	211	3	231	91	118	47	46	22	59	94	1	1	1	36	7	3	88	68	418	8	0
Paenibacillus odorifer	34	57	12	27	0	34	1	23	3	53	4	17	30	12	8	2	4	111	53	307	25	87	6	2	25	25	35	25	153	2	142	63	51	54	38	25	73	67	1	3	0	39	12	2	44	58	214	17	5
Cryomorpha ignava	34	349	65	141	2	290	9	196	28	450	6	20	189	48	49	1	8	913	425	466	181	567	11	1	218	269	329	231	2187	3	1101	473	670	421	295	185	406	1365	5	2	15	235	118	5	343	304	1905	59	16
Synechococcus T7-like virus oc3d	34	3	0	0	1	1	0	0	0	4	3	3	2	0	0	0	2	0	0	86	0	0	1	0	0	1	0	0	6	0	0	0	0	0	0	1	0	4	0	0	0	1	0	0	0	0	0	0	0
Balneolaceae bacterium	34	854	136	336	0	760	25	373	50	721	53	12	488	100	103	5	28	2547	1197	472	407	1043	20	2	283	332	426	718	3198	10	3300	1277	1802	555	358	259	1368	1795	65	25	30	1060	303	14	1018	875	4722	66	19
Rhizobium sp. Root149	34	16	3	5	0	2	0	11	1	20	6	6	8	1	0	2	8	14	7	199	9	9	9	1	7	6	14	17	76	2	11	6	10	28	16	7	41	36	0	0	1	18	7	1	10	10	71	2	0
Crocinitomix algicola	34	275	40	130	3	103	4	179	38	390	2	12	178	29	36	0	3	412	184	323	147	478	11	1	173	211	240	134	1715	1	645	272	334	365	233	156	381	1116	1	4	8	159	95	3	198	151	983	58	29
Flavobacteriaceae bacterium TMED116	34	3675	608	1465	0	313	12	2633	440	5298	0	40	3272	596	736	0	0	1263	517	682	2859	8611	2	0	3128	3611	4438	11482	46905	0	1952	778	939	7651	4973	3325	29266	21849	0	43	85	5496	848	0	380	297	1326	398	129
Persicobacter sp. CCB-QB2	33	170	33	82	1	87	1	86	11	175	3	5	87	13	22	0	4	259	122	391	74	260	8	1	84	106	124	124	913	1	417	151	222	168	107	77	489	597	1	4	8	192	41	1	120	95	561	14	2
Phycisphaera sp. TMED151	33	201	47	92	1	12	0	34	4	70	0	15	136	27	32	1	1	78	36	289	106	201	1	0	7	3	10	5	32	2	41	17	24	11	7	8	12	38	0	5	3	32	7	0	37	30	86	44	11
candidate division Zixibacteria bacterium SM23_81	33	102	25	34	0	190	6	38	14	70	3	23	38	11	11	2	3	637	289	343	40	90	5	2	20	28	42	94	308	4	728	304	447	51	35	22	150	173	2	4	8	128	52	2	251	240	1188	6	2
Tautonia plasticadhaerens	33	163	47	71	1	280	8	32	6	89	3	14	94	18	26	3	3	870	464	312	47	113	14	2	42	57	47	29	404	2	1238	559	736	90	66	42	68	264	1	16	15	67	92	2	513	410	2269	11	4
Synechococcus sp. WH 8016	33	449	78	177	1	6	0	214	40	449	5	7	175	39	42	0	3	19	13	240	74	134	2	1	278	387	453	49	2443	1	82	23	16	745	482	333	96	1758	0	7	4	79	90	1	5	6	19	27	8
Synechococcus sp. PROS-U-1	33	5171	1483	2238	1	81	5	1091	149	2973	2	37	3464	705	901	1	3	249	137	465	876	1980	13	1	626	769	891	73	4093	0	54	19	36	1766	1182	1037	39	4243	0	20	39	187	180	4	40	20	108	166	35
Parcubacteria group bacterium GW2011_GWA2_42_11	33	11	4	4	1	14	0	9	0	7	3	9	1	1	1	3	0	43	16	174	3	17	7	0	8	6	8	10	38	2	42	24	22	23	15	10	33	40	3	0	0	20	1	2	18	13	66	2	0
Lentisphaera araneosa	33	846	160	316	4	367	7	177	23	397	2	40	623	150	148	1	3	1245	603	614	455	1171	10	0	101	150	175	163	1700	1	2510	1037	1461	261	176	125	281	1038	1	16	22	241	235	1	664	563	2969	31	6
Prochlorococcus sp. HOT_208_60	33	2993	498	1173	1	34	1	3230	580	6523	0	3	226	40	49	0	0	65	42	94	390	1025	0	0	408	481	545	58	3987	0	42	20	30	930	632	404	524	2491	0	39	53	960	902	0	44	34	164	602	170
Megasphaera hexanoica	33	4	2	3	0	2	0	2	0	3	7	4	3	0	0	0	5	10	3	217	1	6	7	0	2	9	1	5	19	3	22	4	2	3	3	1	4	13	1	0	0	5	3	0	3	8	18	0	0
Thermopolyspora flexuosa	33	65	24	32	0	17	0	25	5	42	0	3	22	12	4	0	0	75	51	246	19	59	0	0	34	72	70	13	178	0	122	37	48	152	97	73	38	204	1	7	3	36	15	0	72	52	247	13	4
Rhodothermaeota bacterium MED-G18	33	4907	801	1899	1	556	11	3407	570	6916	0	62	2282	486	565	0	0	2870	1157	609	2574	7157	0	1	1923	2274	2782	19196	29606	0	3288	1302	2230	4065	2502	1785	45633	23331	0	41	77	9989	830	0	470	310	1518	461	141
Synechococcus sp. A15-62	33	11976	3401	5020	0	127	4	2614	359	7514	4	64	6481	1346	1581	1	6	376	191	595	1681	4088	12	1	249	325	405	45	2192	0	53	25	22	834	541	475	36	2061	0	21	28	260	117	1	28	32	136	241	76
uncultured Aureispira sp.	33	204	29	62	5	138	7	100	11	181	11	21	113	28	35	0	2	584	217	533	99	275	6	1	60	84	77	88	637	1	648	262	457	162	113	60	207	416	5	4	5	118	55	4	207	196	1132	23	4
Anaerolineales bacterium	33	654	113	294	2	1272	47	210	33	425	5	13	361	71	71	1	5	4198	1933	366	251	778	11	1	184	200	262	504	2028	0	4795	1945	2477	406	229	182	851	982	1	22	34	1078	360	2	2315	2258	9574	52	13
Bisgaard Taxon 44	33	308	53	128	1	103	3	115	15	230	5	8	130	20	32	1	3	339	158	310	102	330	2	1	141	149	172	226	953	4	493	225	190	295	195	133	394	493	1	7	9	207	46	2	124	86	547	43	9
Roseimaritima ulvae	33	453	125	182	0	360	8	86	16	202	2	18	261	56	67	4	2	1311	657	208	155	349	1	0	103	108	149	75	1296	0	1973	892	1267	226	178	112	112	747	3	34	32	90	288	2	714	615	3222	27	6
Shewanella algae	33	56	10	26	3	38	0	15	3	39	19	18	22	8	9	1	20	215	102	330	30	61	24	1	39	56	79	104	336	4	397	167	114	91	58	57	100	196	9	2	7	59	44	11	133	125	1923	3	2
Faustovirus	33	24	5	7	0	4	1	6	1	7	6	7	3	0	1	0	11	32	7	222	7	24	5	2	8	4	10	4	21	7	37	13	17	3	3	6	18	12	0	0	1	26	6	1	15	13	58	0	1
Pseudenhygromyxa sp. WMMC2535	33	417	90	146	0	167	5	70	13	174	2	24	177	40	42	0	1	649	315	483	97	282	7	1	62	59	89	90	691	1	741	310	438	130	71	71	117	445	2	12	16	116	76	0	268	240	1394	28	7
Labrenzia alexandrii	33	92	23	49	1	49	1	34	9	81	4	11	38	8	14	0	12	154	71	256	43	111	16	0	21	39	48	48	298	3	189	74	75	63	46	31	93	126	3	0	0	104	18	6	66	63	462	8	4
Xanthomonadaceae bacterium	33	248	49	79	0	214	3	90	13	187	8	12	131	23	22	1	7	873	397	390	92	249	13	0	87	98	125	163	674	1	991	425	432	180	93	72	260	366	1	19	6	194	66	3	351	319	1604	35	5
Burkholderia gladioli	33	131	44	48	1	97	3	35	8	107	9	15	64	24	17	1	9	325	158	367	38	119	19	2	49	56	66	72	410	2	393	183	180	93	81	41	98	185	9	4	7	77	40	4	193	154	1311	27	7
Pelagibacteraceae bacterium BACL20 MAG-120920-bin64	32	8600	1449	3418	0	7639	253	5869	1110	12134	1	75	5253	977	1318	1	0	24431	9927	1786	5776	16600	1	0	6638	7485	9020	16700	51353	2	49553	19231	11254	15473	9801	6907	45459	19533	2	104	186	19069	1603	0	9012	7294	29448	815	238
Kordiimonadales bacterium	32	241	47	79	0	161	9	110	23	232	2	15	115	19	40	0	2	470	215	251	136	348	4	1	92	117	135	217	1015	0	649	255	283	194	145	131	354	479	1	3	3	267	60	4	204	165	970	19	2
Sphingobacterium mizutaii	32	50	12	13	1	40	5	18	4	58	0	10	32	8	12	0	2	128	55	132	22	68	2	0	14	36	32	49	221	0	144	54	82	57	27	16	106	124	2	1	3	48	22	0	42	54	295	2	0
Tenacibaculum skagerrakense	32	110	26	36	0	36	2	67	18	129	2	5	92	16	15	0	2	198	76	154	58	217	2	0	53	80	108	77	743	2	317	93	168	156	107	65	234	486	1	0	4	86	30	5	94	61	695	18	10
Synechococcus sp. BS56D	32	91	11	30	1	7	0	40	9	59	1	19	53	11	21	0	0	11	5	373	24	56	5	1	50	63	91	13	477	2	17	6	5	145	87	58	20	375	0	7	10	26	51	5	4	2	30	4	0
Phascolarctobacterium faecium	32	384	72	146	0	36	0	131	21	271	1	10	76	13	12	1	2	93	33	293	60	134	6	0	80	119	148	73	1157	4	97	50	51	259	186	129	162	870	0	4	6	122	46	0	58	39	209	27	12
bacterium TMED221	32	10452	1677	4034	0	361	8	5499	994	11226	1	76	5593	1014	1342	0	1	1231	578	2307	5643	16098	3	1	2065	2453	2981	14513	15572	0	1614	655	786	4679	2897	2080	22643	7826	0	88	118	13591	488	0	420	332	1415	418	134
Sphingomonas phage Lucius	32	1	0	0	2	8	0	0	0	2	5	7	2	0	0	0	6	1	3	200	0	2	2	0	0	3	2	1	0	3	1	1	3	3	4	1	1	2	0	0	1	5	0	4	14	17	9	3	0
Dehalococcoides mccartyi	32	74	14	27	4	172	9	48	6	46	4	15	34	8	6	2	6	472	209	260	43	89	9	2	30	27	30	103	283	4	544	220	273	53	28	24	111	122	0	7	5	321	76	2	324	286	1279	5	0
Verrucomicrobia bacterium TMED40	32	6585	1369	2672	0	704	26	1414	235	3334	1	52	4893	960	1127	0	3	2774	1295	550	3264	8257	4	0	885	1209	1400	245	15554	0	6119	2655	3398	2317	1565	1098	951	10502	1	111	139	762	1281	1	1101	1007	5919	296	88
Reyranella sp.	32	432	110	194	0	331	6	153	20	299	8	14	225	41	64	0	9	1042	485	209	163	428	5	4	119	180	210	185	1552	2	1396	605	672	304	212	154	336	717	0	11	17	319	142	6	528	478	2634	44	16
Chryseobacterium echinoideorum	32	14	2	3	1	14	0	7	1	20	0	2	6	2	2	0	0	36	22	33	8	19	3	0	4	6	19	10	65	0	48	16	52	13	10	4	22	35	0	0	0	17	11	0	30	22	785	1	1
Euryarchaeota archaeon TMED192	32	2314	424	972	0	46	1	558	99	1146	1	14	824	159	198	0	0	148	80	255	538	1469	1	0	475	704	877	2535	11743	0	240	123	150	881	524	385	1949	5980	0	16	10	212	109	0	19	37	149	43	9
Pseudohaliea rubra	32	967	496	411	0	175	2	94	7	336	8	3	157	34	32	1	9	509	229	208	184	404	83	13	51	58	87	127	712	0	648	274	327	134	88	50	138	311	9	6	13	113	53	12	247	224	999	46	9
Nanoarchaeota archaeon	32	50	7	17	1	45	2	19	3	45	0	16	28	6	6	0	1	151	67	365	25	74	5	0	21	18	28	29	164	1	164	78	77	50	21	13	81	76	0	0	3	82	25	0	79	70	314	5	1
Alcanivorax sp. DG881	32	6	5	1	0	13	1	0	2	7	12	3	3	1	0	1	5	25	7	79	3	4	8	0	1	12	11	81	54	1	137	73	32	28	14	13	43	18	2	3	4	18	9	2	62	46	813	1	0
Deinococcus roseus	32	57	6	22	0	39	1	14	5	50	3	6	15	5	6	0	4	127	54	242	28	58	9	0	12	8	18	27	107	3	213	85	91	24	17	10	34	61	0	1	4	43	10	1	55	67	256	5	0
Streptococcus suis	32	121	33	52	1	90	0	51	11	103	2	17	64	14	13	0	5	305	129	343	57	163	5	1	51	73	77	88	450	0	341	158	138	118	66	55	136	194	1	5	12	152	34	3	143	108	605	29	4
Roseobacter virus SIO1	32	4	0	2	0	0	0	2	0	4	0	6	0	0	0	0	8	2	2	210	2	6	8	0	1	1	2	1	7	5	8	3	3	4	2	3	3	8	2	0	0	6	0	1	0	2	2	0	1
Flavilitoribacter nigricans	32	420	75	182	1	429	12	170	30	368	169	31	255	49	64	2	11	1492	631	514	211	551	89	7	157	155	205	307	1715	6	1770	712	1020	300	195	137	667	1088	289	16	17	462	155	2	751	645	3509	37	19
Clostridium perfringens	32	134	26	58	1	97	3	95	18	185	2	17	66	20	16	0	8	332	163	564	100	253	15	1	71	64	93	117	603	7	570	203	213	149	79	72	312	333	1	2	7	211	50	5	195	162	636	19	3
Thalassoglobus neptunius	32	423	85	185	1	444	20	79	16	176	4	20	219	40	50	0	2	1380	644	286	139	286	5	2	89	95	130	85	1172	2	2336	1049	1471	213	129	91	125	679	2	21	30	157	254	3	702	573	3445	16	4
Nannocystis exedens	32	472	118	179	1	245	4	82	17	208	2	15	196	35	50	0	1	836	396	239	114	282	9	0	68	102	85	94	847	2	1051	437	591	128	92	73	131	440	1	17	18	144	109	1	393	342	1887	36	13
Pectobacterium virus DUPPII	32	0	0	0	1	0	0	0	0	1	1	13	0	0	0	0	10	0	0	263	0	1	17	2	0	2	1	0	5	4	0	0	0	2	1	2	1	0	0	0	0	8	0	3	0	0	0	0	0
Verrucomicrobia bacterium 12-59-8	32	160	35	70	2	110	4	36	6	78	5	20	87	20	25	1	10	364	203	441	47	157	9	1	30	48	60	31	458	5	594	247	354	89	67	46	65	273	3	4	13	52	62	4	178	159	1020	13	3
Serratia marcescens	32	155	32	67	2	98	3	44	6	94	8	11	63	13	18	0	8	331	145	268	59	138	14	1	48	58	56	86	465	4	428	190	195	104	85	69	127	213	7	8	11	80	36	3	132	155	1042	28	11
Persicimonas caeni	32	547	124	244	0	611	15	145	22	328	1	21	230	38	50	6	31	2072	975	459	129	397	9	1	86	100	117	200	1077	2	1902	820	1211	170	101	64	243	655	5	20	27	355	207	3	651	603	4745	36	9
Synechococcus T7-like virus S-TIP46	32	2	0	0	1	0	0	3	0	7	1	10	0	0	0	1	9	0	0	193	0	2	8	1	2	3	0	2	17	1	0	0	0	8	5	0	0	11	0	1	0	9	0	0	0	0	0	1	1
Candidatus Thiodictyon syntrophicum	31	129	31	56	0	124	2	56	9	133	3	6	56	16	20	1	4	393	179	336	46	124	3	0	40	43	59	83	330	1	479	186	227	94	60	53	114	171	3	2	5	84	34	2	220	197	921	16	2
Planctomycetes bacterium TBK1r	31	292	65	116	2	215	6	49	9	103	8	10	150	30	39	1	7	759	327	344	71	173	12	0	47	55	57	14	615	3	1136	491	718	104	66	53	33	389	2	8	15	47	91	10	373	330	1728	5	1
Stopalavirus S38C3	31	28	5	8	1	0	0	8	1	11	2	13	4	3	0	1	5	1	0	267	5	8	3	0	13	12	14	1	24	3	2	1	0	39	20	11	1	13	1	0	0	9	0	0	0	1	0	0	0
Altererythrobacter atlanticus	31	32	9	23	1	60	2	18	3	37	10	8	49	4	9	2	3	391	209	152	17	45	12	0	17	19	25	27	229	0	117	58	76	44	26	17	53	123	0	3	4	47	18	15	125	121	1754	3	0
Candidatus Woesebacteria bacterium	31	76	22	33	4	115	2	36	5	73	8	14	42	14	10	0	10	329	141	354	41	150	11	1	32	33	43	87	286	1	371	133	166	68	51	41	179	149	3	1	3	147	26	4	153	112	536	5	2
uncultured Mediterranean phage uvDeep-CGR2-KM21-C338	31	0	0	0	2	4	0	0	0	0	1	5	0	1	0	2	4	6	4	142	0	0	12	0	1	0	1	0	1	2	11	5	5	0	0	0	0	1	0	1	0	4	1	0	11	20	58	0	0
Synechococcus sp. RS9916	31	1585	415	677	1	48	4	422	50	1132	3	39	1720	343	372	1	3	203	97	584	336	793	7	0	574	736	758	114	4453	0	134	62	69	1313	906	754	143	3811	0	40	57	186	844	0	49	50	211	38	14
Candidatus Marithrix sp. Canyon 246	31	208	35	97	1	233	5	103	18	192	3	9	104	27	25	0	4	788	322	235	106	276	8	2	91	89	137	312	791	1	1217	478	459	187	121	110	383	389	3	3	4	234	57	3	370	311	1407	21	6
SAR116 cluster alpha proteobacterium HIMB100	31	3317	595	1242	2	343	13	1181	212	2602	5	19	1460	273	348	2	3	1217	554	340	1201	3120	4	0	560	718	873	535	6846	3	1664	693	704	1536	1021	720	1427	3530	4	34	43	872	442	2	533	472	1959	585	167
Halomonas titanicae	31	507	99	205	6	319	7	116	21	262	45	11	176	39	40	10	73	654	283	141	116	279	195	18	96	131	184	635	1576	4	908	477	396	305	197	150	450	786	39	12	16	311	89	22	535	463	5988	20	3
Fulvivirga sp. M361	31	343	70	134	1	192	5	189	29	290	7	16	202	27	52	1	3	663	317	384	163	437	12	0	126	179	177	289	1544	0	967	391	439	261	200	145	785	918	2	5	9	420	95	9	334	304	1565	39	12
Micavibrio sp. TMED2	31	877	250	385	2	2031	62	208	38	472	4	20	539	106	131	1	7	2653	1327	159	199	499	5	0	233	298	327	2238	1967	19	24935	11436	5047	1269	806	791	1352	1175	24	404	512	605	1222	10	10585	10045	58277	625	161
Synechococcus sp. KORDI-52	31	5549	1655	2272	1	99	1	1207	189	3397	2	39	3742	783	914	0	6	325	171	393	1064	2277	7	2	397	543	605	55	3143	0	121	43	34	1141	766	684	29	3137	0	34	25	175	247	3	42	44	143	191	50
Leptolyngbya foveolarum	31	92	21	48	0	29	0	34	6	71	3	16	31	13	12	1	2	81	31	345	33	93	1	0	54	87	86	46	389	0	114	38	51	149	102	91	78	255	2	2	3	57	33	2	49	50	206	5	3
Micavibrio sp. TMED27	31	772	168	326	0	210	13	211	37	451	8	9	365	79	80	0	3	1038	445	485	194	557	10	0	148	162	209	347	1483	1	510	231	214	363	213	158	629	649	2	10	12	449	117	2	523	434	1443	27	10
Actinomyces sp.	31	954	228	418	0	3075	95	240	34	576	6	12	505	103	120	0	11	13126	7118	344	307	708	14	4	354	453	540	1688	5759	4	25322	11923	10798	575	339	252	2333	2606	1	17	32	1329	251	1	5042	5345	19648	36	10
Thermoflexibacter ruber	31	205	35	70	1	150	5	89	24	194	4	8	113	12	12	0	1	522	236	192	107	262	5	0	99	90	124	229	1021	2	671	260	347	187	137	86	498	658	1	8	7	249	69	0	204	190	883	15	7
Myxococcaceae bacterium	31	591	143	215	2	341	5	124	17	298	3	26	266	45	54	0	8	1234	632	363	139	410	5	1	175	177	194	142	1163	1	1470	693	813	286	212	186	194	681	6	16	34	170	128	2	563	515	2664	59	11
Rhodospirillales bacterium	31	1010	201	385	0	588	12	320	61	633	17	11	441	101	115	2	3	1827	887	435	363	933	10	0	341	369	443	441	3614	3	2405	1029	1117	886	496	395	913	1764	10	17	17	633	262	13	916	848	4069	96	22
Candidatus Pelagibacter sp. TMED272	31	7464	1234	3065	0	764	26	4497	809	9406	0	82	5101	966	1237	0	0	2572	1053	2059	5784	16978	1	0	3774	4427	5440	9165	27498	0	3512	1353	1046	9090	5793	3917	23917	10406	0	119	169	15679	1212	0	792	663	3164	916	288
Halieaceae bacterium	31	17285	4844	7163	0	367	12	4030	534	10745	5	65	10387	2198	2522	1	5	1198	543	467	4066	9601	19	0	458	572	690	817	6809	1	1803	759	760	1183	822	588	888	3073	2	139	187	1473	882	1	517	435	1950	2055	527
Laribacter hongkongensis	31	79	11	40	0	65	3	34	7	76	1	6	42	12	10	1	2	216	100	154	33	100	4	0	36	50	51	81	403	1	352	143	142	97	66	56	146	217	2	1	3	70	25	2	92	89	553	7	3
Alphaproteobacteria bacterium MarineAlpha9_Bin4	31	3998	697	1582	2	403	10	2661	480	5543	4	24	3158	651	736	1	3	1327	568	567	2987	8436	3	0	1196	1426	1792	1191	13315	3	1518	577	552	3438	2264	1529	4193	4857	2	69	78	2722	2217	1	481	403	1707	815	229
uncultured nuHF2 cluster bacterium HF0770_42C12	31	41	9	23	0	221	8	9	1	22	2	7	17	4	2	0	5	785	382	175	13	28	15	3	10	9	16	4	115	0	851	365	410	24	18	14	15	57	3	2	3	9	8	3	424	408	2110	6	1
Synechococcus phage S-CBS3	31	1	0	2	3	1	0	1	3	3	2	12	3	1	0	2	8	1	0	329	3	6	10	1	2	0	5	0	9	5	4	1	0	5	3	0	0	6	0	0	0	1	0	2	0	0	4	0	0
Bacteriovorax stolpii	31	285	39	111	1	202	6	95	16	203	2	17	168	30	38	1	2	682	320	443	116	331	5	2	67	97	112	488	891	2	746	287	313	165	103	66	520	424	1	12	17	487	149	0	310	258	1137	29	7
Pseudomonas abyssi	31	4	1	1	2	15	1	2	0	8	10	7	430	99	98	37	313	34	18	27	1	11	1368	153	144	184	162	1615	4626	16	801	486	3393	285	202	221	536	1701	10	91	91	354	720	10	5748	5516	72456	40	8
Pelagibacteraceae bacterium GOM-A5	31	10345	1785	4048	0	1492	35	8140	1462	16492	0	76	6117	1163	1446	0	1	4756	1900	1302	6594	19383	2	2	3014	3385	4335	7422	27346	0	7482	2788	1849	7221	4529	3191	23443	9859	0	100	181	19525	2012	0	1553	1260	5065	1916	512
Campylobacter fetus	31	42	5	19	1	28	1	30	7	52	2	6	23	6	7	0	2	130	68	169	34	89	5	0	27	39	29	53	266	2	195	71	63	75	32	21	149	109	3	0	3	80	16	1	59	37	218	12	3
Spartinivicinus ruber	30	129	27	52	2	88	4	55	13	122	3	8	72	17	18	2	6	375	145	196	55	162	7	0	31	59	60	97	430	0	511	211	199	77	69	35	149	205	2	4	2	109	41	2	147	116	629	6	6
Nocardia terpenica	30	72	15	27	0	47	1	9	3	43	2	18	35	5	4	0	7	181	80	277	20	49	4	1	19	22	27	30	141	2	253	106	137	38	27	28	25	61	0	2	2	27	8	3	81	82	370	10	3
Bilophila wadsworthia	30	9	2	5	1	11	1	8	2	10	4	6	8	4	4	1	6	42	15	200	4	14	11	1	7	8	8	7	40	5	53	21	32	14	7	5	18	26	1	1	2	21	2	3	45	33	117	7	2
Ruminiclostridium sp. MA18	30	36	13	21	1	33	3	20	5	38	4	6	25	6	6	1	6	136	44	229	38	74	9	1	20	29	28	34	188	5	184	67	81	42	32	17	97	118	6	3	2	57	14	4	42	56	232	2	3
Pirellula staleyi	30	676	129	252	0	611	21	89	14	227	7	14	277	68	74	1	1	1634	864	265	186	512	4	1	108	141	171	44	1436	0	2747	1228	2048	250	181	132	89	1018	2	54	72	172	646	4	861	810	4261	7	2
Propionispora hippei	30	30	4	10	2	13	0	11	3	25	6	1	9	1	5	0	7	41	21	132	10	27	6	1	2	5	4	16	60	2	64	22	22	15	3	5	33	21	0	1	0	31	5	2	24	17	108	0	0
Virus NIOZ-UU159	30	253	45	88	0	82	4	126	17	252	1	91	325	66	67	2	2	288	132	2183	1103	3409	11	1	87	89	120	108	513	3	449	190	154	210	136	96	525	357	0	7	8	648	65	1	194	151	443	26	13
uncultured phage MedDCM-OCT-S04-C1220	30	1	2	0	1	0	0	0	0	2	3	7	0	0	0	0	2	0	0	141	0	3	6	1	0	0	0	0	0	2	0	0	0	0	0	0	0	0	0	0	0	1	0	2	0	0	0	0	0
uncultured cyanobacterial podovirus	30	14	2	6	0	0	0	1	0	6	1	6	2	0	0	0	2	1	0	112	1	1	9	0	1	0	2	1	3	0	0	0	0	5	0	1	2	5	0	0	0	1	0	0	0	0	0	0	0
Planctomycetes bacterium ETA_A1	30	231	58	91	1	320	3	42	11	106	6	13	125	29	36	1	5	969	544	382	92	186	6	2	42	57	76	53	612	1	1498	661	976	104	67	59	73	372	1	21	20	107	148	5	487	505	2595	12	2
Halobacteriovorax marinus	30	539	87	245	2	334	14	178	28	436	3	18	275	70	58	2	4	1045	434	368	260	736	3	0	202	206	291	1442	2071	4	1187	489	541	411	251	196	1304	819	2	17	42	862	247	2	596	458	2127	45	11
Terrestrivirus sp.	30	147	37	74	3	45	1	61	12	148	1	28	98	15	14	0	1	186	75	816	107	269	4	0	95	89	89	39	451	2	212	81	114	166	89	77	260	249	2	7	8	184	42	2	101	85	280	24	4
Thermotogae bacterium	30	89	27	43	1	95	3	35	8	74	2	8	49	14	11	1	4	318	152	281	56	114	0	0	33	52	50	101	385	2	352	146	187	79	55	36	223	164	2	6	7	199	40	2	110	119	619	12	3
Roseibacillus sp. TMED18	30	1806	424	719	0	598	19	248	37	584	6	21	1466	288	384	0	3	2299	1153	225	381	928	5	0	505	743	838	62	6875	0	4119	1843	1984	1269	877	696	84	3590	1	118	166	46	966	0	930	954	4032	32	5
Anaerolineaceae bacterium	30	354	82	172	0	450	18	130	21	314	2	11	192	37	53	0	6	1435	613	325	162	492	7	1	120	155	201	314	1184	0	1674	696	859	248	165	120	564	572	4	10	20	631	163	4	761	677	2967	14	11
Nocardioides albus	30	22	4	13	0	14	0	10	2	13	2	4	13	0	1	0	2	62	32	149	3	15	5	0	4	6	5	12	34	0	71	26	26	6	4	4	7	20	0	1	3	34	4	1	27	41	203	1	1
Bdellovibrio exovorus	30	139	17	53	0	66	1	41	11	116	4	13	66	8	15	1	2	193	91	575	58	155	6	3	75	93	130	731	864	2	246	91	117	117	89	64	383	226	1	4	3	209	33	0	300	274	621	14	3
Sandaracinus amylolyticus	30	513	142	198	0	313	9	89	11	229	9	19	271	51	66	0	1	1391	651	212	123	300	7	2	77	103	121	106	825	0	899	385	540	151	99	85	136	542	43	19	28	128	150	2	356	351	3006	27	11
uncultured Solirubrobacteraceae bacterium	30	311	90	124	0	268	8	65	13	177	4	12	151	28	42	0	7	852	392	353	103	214	15	2	140	127	103	126	816	2	1076	483	529	184	139	149	159	313	1	16	26	202	66	5	389	367	2093	57	14
uncultured Thermomicrobiales bacterium	30	358	91	152	1	477	21	95	12	224	1	17	190	32	42	0	4	1499	698	269	118	307	17	2	107	127	137	176	964	3	1854	829	988	213	128	120	217	441	1	18	19	544	158	2	939	799	4349	51	15
bacterium A52C2	30	165	38	75	1	74	3	65	12	171	4	11	69	16	24	1	8	216	109	380	60	199	14	1	59	86	83	110	652	5	286	116	120	155	102	61	250	257	2	1	7	188	38	5	103	85	608	14	4
Marine Group III euryarchaeote CG-Bathy1	30	351	49	147	1	2819	100	106	17	215	1	14	226	40	45	0	1	10157	4395	279	119	333	0	0	301	351	472	1225	7671	1	15249	5987	10891	550	376	210	1675	3004	0	26	39	1340	1104	1	2004	1751	10742	8	2
Ostreococcus lucimarinus virus 1	30	301	51	117	0	5	0	72	15	174	2	60	80	8	20	1	4	17	5	1655	179	461	2	0	8	12	6	3	23	0	11	4	2	12	7	6	13	19	2	0	1	20	1	0	3	4	17	1	0
uncultured Mediterranean phage uvDeep-CGR2-KM19-C269	30	2	0	1	1	1	0	0	1	2	1	7	0	2	0	1	8	4	0	189	1	2	3	0	2	0	2	2	9	1	15	9	4	6	5	2	1	3	0	0	0	1	0	0	3	1	2	0	0
uncultured phage MedDCM-OCT-S04-C136	30	1	2	2	1	0	0	1	0	5	8	12	2	1	0	2	6	2	0	258	1	1	15	1	0	7	6	2	13	8	5	2	0	10	6	5	6	7	3	0	1	4	2	3	0	0	3	0	0
Planctomycetales bacterium 10988	30	497	85	189	3	473	8	122	19	228	4	19	249	47	44	0	4	1332	665	249	141	369	11	0	82	98	128	103	1214	2	1930	826	1250	211	150	95	192	715	0	14	44	175	311	2	657	637	3297	14	1
Cupriavidus taiwanensis	30	195	37	85	2	122	7	93	18	187	5	7	126	18	24	1	4	446	208	219	90	204	18	2	100	155	149	220	1346	3	636	263	317	267	162	136	238	757	2	5	10	174	47	4	258	228	1522	42	4
Yangia sp. PrR004	30	115	24	48	0	5	0	17	1	41	0	2	30	7	10	0	0	18	9	354	29	80	0	0	36	69	64	4	194	0	25	4	1	83	67	36	7	126	3	4	3	9	8	5	25	28	221	10	2
Ottowia thiooxydans	30	67	20	30	1	67	3	32	8	71	7	6	49	17	11	1	2	237	104	199	34	92	5	0	33	40	42	81	286	1	275	105	129	69	41	47	100	130	0	4	4	83	35	5	111	121	564	8	1
Leptolyngbya sp. PCC 7376	30	76	21	30	2	36	1	29	3	58	3	9	39	9	8	4	5	134	65	202	31	79	7	0	33	51	59	42	259	2	235	86	99	97	63	53	48	143	0	2	8	48	28	4	70	65	285	10	2
Parachlamydiaceae bacterium	30	86	14	32	0	31	0	48	8	77	1	2	41	6	4	0	0	111	55	152	37	82	2	0	16	23	21	67	228	0	137	58	65	47	39	14	128	118	0	3	3	111	29	1	59	48	285	5	2
Schlesneria paludicola	30	357	70	143	1	525	12	72	13	115	1	7	177	44	43	1	7	1556	841	306	84	227	5	1	66	85	102	79	766	0	2725	1242	1671	152	99	71	100	458	0	25	22	150	235	1	809	768	3882	10	7
Candidatus Nephrothrix sp. EaCA	30	148	23	51	0	101	5	57	5	131	0	3	66	14	20	0	1	308	135	128	68	185	0	1	52	64	63	78	506	1	287	131	145	125	71	33	228	253	4	2	7	109	25	0	141	113	478	32	11
Aequorivita soesokkakensis	30	40	9	21	3	60	3	16	8	39	31	14	41	4	6	15	111	341	151	176	24	56	116	11	16	18	35	28	203	15	95	43	52	47	33	27	54	137	302	1	0	212	33	2	71	63	3279	6	2
Bacteroidales bacterium St1	30	55	10	23	0	43	3	37	9	76	0	5	44	11	13	0	6	150	67	133	40	91	3	0	22	26	40	68	263	2	194	64	112	72	32	27	98	172	1	3	5	63	17	1	58	62	284	12	5
Betaproteobacteria bacterium TMED100	30	356	78	124	3	122	6	160	34	331	5	17	221	46	46	0	12	441	214	434	203	503	6	1	225	267	264	258	2221	3	579	199	227	533	306	225	608	961	3	6	7	312	85	4	158	94	592	31	5
Sphingomonadales bacterium	29	471	92	169	1	265	7	173	34	406	26	14	256	56	51	3	7	1074	538	270	185	481	19	2	131	168	221	308	1568	3	960	409	484	349	226	178	503	728	12	18	11	430	145	30	475	424	6354	43	14
Flavobacteriaceae bacterium TMED179	29	404	73	170	1	72	2	215	49	513	2	20	542	94	129	0	1	229	101	567	275	846	3	0	232	273	347	961	3676	0	377	143	207	569	380	257	2195	1689	1	12	15	1152	185	5	70	47	280	57	13
Synechococcus sp. 1G10	29	96	23	48	0	22	0	40	4	77	1	18	59	17	10	0	3	56	19	330	30	63	6	1	45	73	86	27	434	0	56	21	23	137	97	77	49	310	1	6	15	49	158	1	23	26	102	7	0
Caldithrix sp.	29	592	109	226	1	1499	40	224	44	528	4	17	366	58	75	2	2	4783	2118	312	276	821	9	1	146	209	259	820	2695	2	5793	2425	3355	344	201	157	1450	1363	1	24	33	1063	314	1	2142	1855	9107	22	5
Pelagibacteraceae bacterium TMED170	29	7544	1278	2945	0	3407	125	4532	769	9206	1	71	4939	945	1160	0	2	10819	4380	1914	5471	15484	3	0	4475	5025	6167	10440	32132	0	14286	5472	4347	10540	6629	4496	27306	12133	0	108	177	16840	1438	0	3855	3027	14410	833	226
Runella slithyformis	29	108	16	44	1	106	2	48	9	116	0	8	46	8	14	0	1	227	126	127	50	136	3	0	59	66	69	58	375	0	323	148	164	112	69	51	135	174	2	6	12	81	34	0	111	115	523	49	6
Candidatus Magnetobacterium bavaricum	29	102	25	51	1	374	4	66	9	143	7	28	85	8	18	2	8	1106	469	443	70	165	11	0	61	60	68	80	478	0	1362	544	603	110	71	48	198	272	2	1	6	145	38	3	596	502	1873	13	4
Catovirus CTV1	29	126	32	49	0	52	3	89	11	123	2	19	67	18	14	0	1	155	58	475	100	240	2	0	56	72	102	43	353	1	175	80	75	145	89	70	217	198	1	6	6	149	36	0	78	71	250	22	11
SAR86 cluster bacterium SAR86E	29	7791	1329	3026	0	879	24	4141	711	8139	1	64	5342	1044	1253	0	1	3463	1491	524	4819	13629	2	1	4536	5528	7092	33083	49582	0	6962	2700	2070	10941	6972	4731	27837	25620	0	37	67	6639	599	0	767	635	2213	721	211
Hyphomonas jannaschiana	29	71	9	24	2	34	0	18	3	38	111	3	39	4	11	7	32	126	55	70	26	68	171	19	58	60	63	86	1072	6	139	66	98	118	80	80	63	526	26	16	18	131	254	62	2306	2328	32607	51	12
Chelativorans sp. Marseille-P2723	29	78	25	38	0	77	2	29	8	68	8	7	54	7	9	2	4	254	134	191	39	103	3	0	36	40	49	55	358	0	324	137	165	62	66	34	119	177	0	2	3	99	32	9	128	111	1546	7	2
Organic Lake phycodnavirus 2	29	131	23	70	0	61	4	97	31	208	1	32	141	22	17	1	2	183	71	978	172	529	4	0	128	158	196	245	665	0	327	128	126	342	212	143	883	485	0	10	13	545	61	0	125	92	335	82	25
Prochlorococcus T7-like virus 9f	29	3	0	0	0	0	0	1	0	0	1	7	0	0	0	0	3	0	0	168	0	1	7	3	0	0	0	0	0	0	0	0	0	0	0	0	0	0	0	0	0	1	0	0	0	0	0	0	0
Tuwongella immobilis	29	278	57	131	3	253	9	55	8	152	4	6	125	32	30	1	1	855	389	293	76	215	5	0	65	68	71	54	620	4	1212	530	741	123	88	54	122	364	1	11	20	119	158	0	411	390	2013	12	2
Algiphilus aromaticivorans	29	138	25	68	3	119	4	62	16	137	6	8	84	20	19	3	6	361	171	263	52	185	88	15	35	50	62	136	481	4	507	195	261	100	71	49	179	223	6	3	4	143	54	6	178	177	1230	14	4
uncultured phage MedDCM-OCT-S08-C1615	29	0	1	1	0	0	0	0	0	1	2	19	0	0	0	5	13	1	1	713	1	4	37	3	2	1	5	4	4	7	0	0	0	2	3	1	3	4	2	0	0	0	0	3	0	0	0	0	0
bacterium TMED274	29	5292	874	2070	0	1081	38	3318	542	6486	2	48	2498	437	544	0	3	4884	2004	502	2747	7913	6	0	2075	2365	2985	17454	25866	1	9175	3610	4843	4842	3012	2031	19341	16162	1	47	65	7281	940	0	1306	1018	3872	339	104
Algoriphagus ornithinivorans	29	30	6	10	1	296	13	6	2	24	10	1	27	6	5	2	20	144	62	27	16	25	64	8	12	15	13	440	213	0	69	25	102	35	14	14	211	108	3	2	4	266	41	5	20	20	1040	4	1
Bacteroidales bacterium	29	359	75	130	2	282	9	209	43	433	2	22	223	45	57	1	3	885	385	466	210	619	10	0	220	248	293	327	2243	5	1181	481	652	421	272	181	755	1410	3	14	9	403	138	9	430	380	1827	56	13
Alphaproteobacteria virus phiJl001	29	8	1	2	1	0	0	0	0	2	2	6	1	0	0	0	4	3	2	140	2	8	7	0	0	5	0	1	7	1	2	1	7	2	2	0	0	4	2	0	0	4	1	3	1	0	10	1	0
Rhodopirellula maiorica	29	347	65	144	0	248	10	55	12	161	4	13	220	46	46	2	3	821	379	336	104	243	11	1	65	85	75	53	877	1	1190	545	743	147	97	60	86	532	3	18	19	89	181	3	362	327	1949	17	4
Sulfurimonas sp.	29	221	29	96	2	1379	47	90	19	227	7	18	161	23	38	0	5	3774	1561	333	121	345	7	0	102	120	140	221	1094	1	5187	2095	3128	213	185	96	507	623	1	2	5	350	92	4	2306	1989	10253	32	5
Pseudoalteromonas rubra	29	127	25	41	1	93	3	58	9	90	3	12	55	10	12	0	6	293	116	249	46	156	6	0	60	71	95	125	620	0	401	210	157	169	82	47	208	320	0	2	5	103	44	3	172	152	1264	16	3
Endozoicomonas montiporae	29	189	30	88	0	115	3	76	18	137	12	17	105	12	26	0	9	355	170	439	69	159	12	2	62	73	91	147	592	9	470	208	211	131	75	61	194	242	4	3	4	191	53	10	151	149	611	20	6
Ignavibacteria bacterium GWF2_33_9	29	116	31	46	1	87	5	51	9	128	5	19	59	6	8	0	4	306	149	477	50	164	4	1	27	32	45	82	408	1	381	179	236	67	60	36	187	224	1	4	3	196	50	1	131	122	581	16	5
Cyanophage PSS2	29	25	6	6	0	3	1	5	0	12	6	26	11	2	3	0	7	5	2	479	4	18	13	3	2	6	6	3	20	3	10	6	5	12	6	5	3	10	0	1	1	17	0	0	5	4	18	1	0
Thalassoglobus polymorphus	29	457	85	195	0	536	14	93	10	195	1	18	225	41	50	1	2	1709	817	263	140	322	11	2	60	105	124	83	1095	1	2784	1187	1809	188	118	103	140	735	0	25	30	137	288	3	744	753	4384	18	3
Tenacibaculum sp. SZ-18	29	153	33	70	2	28	2	100	24	218	0	19	139	19	17	0	11	123	63	208	88	313	1	3	83	77	108	89	859	2	211	88	132	181	135	82	232	541	2	4	4	92	35	0	56	41	374	11	6
Campylobacter coli	29	114	18	32	0	110	4	72	12	156	6	16	70	10	14	1	6	304	134	356	82	214	5	1	72	91	90	127	579	0	429	149	183	147	88	69	340	287	1	2	9	239	38	0	140	76	514	12	3
Paeniclostridium sordellii	29	99	15	41	2	74	2	57	9	136	4	10	67	10	18	1	1	225	97	227	66	186	14	0	41	50	64	79	392	2	294	105	120	93	68	41	231	178	0	3	6	141	17	1	99	81	348	12	4
Parasutterella sp. NM82_D38	29	34	11	12	1	29	1	18	2	24	1	11	22	1	3	0	3	87	29	251	18	48	5	0	11	7	24	32	159	0	106	43	56	31	18	22	62	56	1	1	1	41	14	1	49	30	165	6	0
Geminisphaera colitermitum	29	35	9	6	1	8	1	10	2	24	6	8	15	4	2	2	8	46	14	208	8	33	3	1	3	4	4	2	54	2	68	39	42	9	10	8	9	35	2	1	0	25	4	1	38	30	147	2	0
Aquimarina algiphila	29	34	4	11	1	8	1	14	1	20	6	16	11	2	5	2	7	45	19	322	9	27	14	2	16	19	21	35	158	2	43	15	17	24	25	19	88	71	4	1	3	24	8	1	10	13	190	3	1
Alistipes ihumii	29	51	11	18	2	20	0	20	4	36	4	15	17	3	4	0	2	79	25	341	21	45	2	0	18	23	26	18	177	0	89	45	50	31	28	19	59	113	0	0	4	41	6	1	41	24	148	3	3
Anaerolineae bacterium SG8_19	29	133	29	53	0	159	8	36	4	74	0	7	54	9	10	0	2	513	277	194	34	124	3	1	28	28	59	85	367	2	599	233	284	77	46	27	108	181	3	5	4	139	65	2	311	284	1155	8	4
Ostreococcus lucimarinus virus 2	29	307	66	127	0	6	1	79	11	153	4	97	79	19	23	0	8	14	6	2215	206	584	8	2	34	40	41	5	148	4	5	4	7	53	46	35	21	55	0	0	0	14	1	1	3	2	9	3	0
Prochlorococcus phage P-TIP1	28	1	0	0	1	0	0	0	0	3	3	6	1	0	0	0	3	0	0	201	0	1	7	0	0	0	0	0	1	0	0	0	0	0	1	0	1	0	0	0	0	0	0	3	0	0	0	0	0
Candidatus Pelagibacter sp. HTCC7211	28	9781	1664	3857	0	2405	81	6280	1147	13234	3	67	6132	1139	1422	0	1	7899	3352	1742	6626	19286	2	0	8974	10507	12888	25772	75033	1	14505	5550	3607	22954	14486	10028	71991	29676	1	92	170	17878	1360	3	2683	2218	9417	1020	313
Prochlorococcus sp. HOT208_60m_808G21	28	1884	314	724	0	11	0	2068	383	4178	0	3	152	22	26	0	0	23	4	32	245	654	0	0	147	151	195	32	1398	0	6	2	7	295	209	138	191	882	0	25	33	709	563	0	25	17	56	359	123
Rhodobacter sphaeroides	28	192	50	88	2	112	5	84	14	149	20	7	115	23	31	0	5	431	216	234	69	169	19	3	63	98	115	100	800	3	409	164	182	205	149	99	163	442	5	7	7	109	38	16	168	149	1874	23	10
Bacteriovorax sp. MedPE-SWde	28	222	39	72	1	208	6	74	17	187	4	17	89	30	35	0	2	572	251	357	117	313	1	0	90	91	112	600	785	2	677	317	284	156	91	72	525	327	0	9	16	399	105	2	267	240	1049	17	2
Polaribacter filamentus	28	151	24	38	0	55	4	78	17	225	2	8	99	17	21	0	3	243	93	280	109	269	13	1	99	100	144	153	1149	7	379	170	235	233	128	115	430	756	7	1	2	139	36	2	81	61	548	19	5
Oscillatoriales cyanobacterium	28	346	72	134	1	201	4	117	20	207	3	13	126	30	41	1	4	559	244	251	118	354	6	1	232	286	380	170	1300	6	739	342	337	891	503	397	305	847	5	12	16	193	115	1	329	293	1177	71	13
Acidithiobacillus sp.	28	570	95	222	0	15585	464	133	25	286	8	17	673	125	165	2	11	48720	23170	421	300	692	11	1	279	350	424	409	3593	5	78373	33711	40686	732	493	342	961	2065	6	11	19	736	562	2	29225	26892	141477	22	9
Paralcaligenes ureilyticus	28	52	13	17	2	53	3	22	1	25	4	10	26	2	7	0	5	173	77	140	25	58	4	0	25	23	34	33	229	1	254	116	106	62	35	28	82	117	7	0	2	32	14	0	90	95	370	2	0
Frigoriglobus tundricola	28	137	27	59	1	162	5	42	5	97	0	7	82	14	21	0	2	549	267	264	45	142	5	0	32	46	48	26	331	5	782	332	497	70	39	36	52	184	0	5	11	98	53	1	304	293	1442	13	1
Candidatus Latescibacteria bacterium ADurb.Bin168	28	114	25	39	0	234	6	44	6	78	3	8	52	13	16	2	1	735	323	283	58	111	5	1	39	48	48	94	407	2	984	421	575	66	59	46	120	216	1	7	8	109	85	1	442	412	1808	9	1
Lentisphaerae bacterium	28	138	32	46	1	114	5	31	5	73	5	8	58	11	18	0	6	368	177	280	60	117	6	0	29	45	57	50	360	1	540	238	341	82	59	37	99	235	1	4	9	84	32	0	222	213	1022	14	1
Gemmiger sp. An87	28	9	2	8	2	3	0	5	0	9	5	7	3	0	0	0	8	10	5	161	1	5	6	1	1	3	4	11	24	3	7	2	5	11	2	3	8	9	2	0	0	8	1	3	8	4	17	2	0
Anabaena sp. CRKS33	28	12	2	6	1	4	1	6	3	12	5	20	4	1	0	1	5	17	8	331	10	23	5	1	21	30	34	29	71	2	24	11	4	60	36	21	50	58	4	2	0	16	5	2	10	16	44	3	1
Thiosulfativibrio zosterae	28	79	18	29	0	51	1	37	5	49	0	9	35	6	10	1	2	177	65	221	30	88	3	0	30	33	57	125	315	0	262	83	99	72	41	31	134	121	0	6	1	74	17	2	76	40	303	12	1
Minicystis rosea	28	430	116	184	0	277	8	90	16	241	4	11	210	42	53	2	4	888	477	323	124	294	4	1	92	116	118	111	791	3	1022	462	585	160	91	106	171	471	8	11	14	203	99	2	387	366	2098	39	9
Rhodoferax sediminis	28	111	11	29	3	60	1	34	11	75	2	13	50	8	12	0	4	204	106	276	39	114	14	1	28	30	29	53	329	2	291	123	139	66	49	30	134	164	1	3	3	104	25	2	82	61	378	6	2
Bacillus sp. SRB_331	28	23	0	5	0	0	0	7	0	13	1	9	2	0	0	0	2	2	0	382	3	11	1	0	7	9	12	13	16	0	4	0	2	11	19	6	9	14	4	1	1	19	1	0	2	0	3	5	3
Burkholderia cepacia	28	120	28	53	0	81	2	37	6	85	1	11	51	18	9	1	3	255	120	227	50	91	9	2	57	64	78	52	331	2	295	138	131	108	69	58	85	121	4	9	13	98	33	1	116	111	714	23	14
Alteromonas sp. KUL17	28	173	35	66	0	343	6	10	1	20	1	2	44	6	7	0	0	915	411	70	9	19	0	0	202	264	346	572	829	0	952	498	50	258	132	114	326	854	0	18	22	112	461	0	519	451	25333	15	2
Cyanophage S-RIM89	28	16	2	4	0	0	0	2	0	7	4	8	2	1	0	0	1	0	0	261	2	6	2	0	4	0	2	5	3	0	0	0	0	5	3	3	6	7	1	1	2	8	1	0	0	0	0	4	1
uncultured bacterium EIL26B11	28	4107	712	1591	3	33	1	1995	369	3913	2	66	2833	488	665	0	3	115	47	1470	2432	7158	0	1	327	408	498	3438	1796	0	50	23	29	783	458	315	3950	1047	0	19	30	3404	66	1	38	25	92	95	25
Massilia sp. PDC64	28	10	1	1	2	11	1	3	3	5	3	1	5	0	1	0	1	35	23	101	6	8	4	0	4	5	2	4	52	2	55	28	32	14	15	8	16	24	0	2	1	11	5	0	21	17	132	0	0
Roseivirga sp. XM-24bin3	28	79	6	34	1	246	8	27	1	50	3	3	54	8	11	0	1	221	100	178	27	90	6	0	14	12	27	46	173	0	101	46	59	30	25	13	105	124	0	5	4	243	142	2	204	145	5075	34	7
Hyphomicrobium sp.	28	574	98	226	0	343	13	273	40	485	19	16	343	51	68	0	7	1150	501	347	266	755	12	2	248	314	341	544	2540	2	1439	602	660	599	394	266	905	1093	2	13	14	578	126	11	514	469	2375	47	19
Formosa sp. Hel1_33_131	28	176	38	56	0	71	0	115	15	221	3	6	111	26	26	0	2	215	86	177	99	278	12	1	114	135	180	128	1325	4	705	275	259	361	216	171	328	907	6	4	2	111	40	0	126	100	875	82	28
Alteromonas abrolhosensis	28	100	18	43	0	169	4	7	0	13	0	3	38	9	6	0	0	1063	397	65	3	5	0	0	104	125	147	167	406	0	474	236	15	105	67	52	86	426	0	46	84	276	2074	0	1047	897	103970	1	1
Pseudomonas viridiflava	28	194	41	92	1	124	3	62	7	139	6	11	105	19	20	3	25	503	198	308	57	186	55	3	72	78	116	158	733	4	671	294	456	172	125	82	208	342	12	11	9	164	67	5	302	309	2762	20	4
Paenibacillus sp. MAHUQ-46	28	149	17	68	0	17	1	50	10	99	2	4	82	9	19	0	0	64	31	101	80	197	1	0	122	142	155	86	563	1	68	24	51	306	162	125	254	671	0	0	3	46	33	1	25	33	157	20	7
Freshwater phage uvFW-CGR-AMD-COM-C455	28	3	1	2	0	2	0	0	1	3	2	8	1	1	0	1	3	8	2	219	3	4	6	0	1	1	2	3	11	2	7	2	6	6	3	1	3	9	4	0	0	10	0	2	5	5	10	1	0
Enterocloster bolteae	28	26	5	13	0	17	0	15	2	26	2	4	11	3	4	0	2	65	25	207	11	31	4	0	10	8	17	21	75	5	90	40	40	18	20	11	43	38	0	0	1	33	2	0	41	43	169	11	2
Candidatus Thioglobus sp. TMED218	28	589	107	231	1	9396	266	392	67	738	2	18	1075	216	239	2	8	36561	15611	328	648	1970	18	1	2333	2955	3624	2474	27271	0	100390	39947	35188	5241	3307	2280	9333	13724	2	8	10	886	118	4	11078	9528	40759	48	14
Thalassospira marina	28	105	27	32	2	52	0	47	7	86	10	12	58	9	9	2	10	153	74	195	43	86	10	1	29	53	53	43	406	9	217	80	86	111	53	33	128	202	7	3	4	85	40	7	129	119	596	13	5
Aquisphaera giovannonii	28	118	35	65	0	192	8	29	2	60	6	9	65	17	16	1	3	592	259	249	40	112	10	1	35	38	49	35	290	4	762	334	442	57	39	35	45	191	2	8	8	56	77	1	288	301	1687	14	3
Neisseria meningitidis	28	173	44	62	0	88	3	62	5	108	4	10	71	16	17	1	12	253	131	159	47	105	8	0	57	63	82	168	517	1	344	162	169	124	85	70	165	204	2	6	8	109	23	0	133	141	741	56	12
Orpheovirus IHUMI-LCC2	28	45	15	24	0	14	0	15	0	25	3	15	28	6	4	0	2	44	15	380	30	72	4	1	25	28	32	13	92	1	43	18	15	52	32	29	33	61	0	2	4	58	7	1	13	16	58	5	2
Mesorhizobium loti	27	189	50	69	1	125	5	63	11	134	5	11	111	21	22	0	8	462	206	207	59	200	4	2	51	70	104	152	594	0	538	220	251	147	82	83	214	267	3	3	5	168	37	6	190	174	1347	23	12
Hokovirus HKV1	27	156	25	69	0	44	0	63	12	132	0	17	58	14	19	0	3	141	68	546	100	250	4	0	62	79	99	44	324	2	206	72	84	136	86	49	252	223	1	7	13	242	37	0	103	102	288	26	2
Glycocaulis profundi	27	252	55	88	0	74	1	69	12	165	3	13	106	20	26	1	4	227	118	474	99	280	2	1	70	138	126	102	644	1	320	93	134	198	135	108	181	323	5	4	10	149	37	6	128	112	756	25	8
Synechococcus sp. CC9605	27	14902	4053	6178	1	145	5	3371	456	9134	4	68	6797	1387	1708	1	3	414	210	630	1947	4256	4	2	396	463	584	51	2806	0	17	12	11	1156	712	644	10	2790	1	32	39	451	189	1	42	36	96	547	132
Magnetospirillum gryphiswaldense	27	1132	219	502	0	354	5	360	48	730	10	21	455	86	123	0	5	1143	525	446	307	914	9	1	224	342	375	1075	2802	4	1487	620	518	627	425	330	1097	1167	8	15	9	941	115	8	478	445	2824	63	16
Panacibacter sp. KCS-6	27	96	13	34	0	89	0	48	3	89	5	11	50	13	10	0	3	246	112	222	51	129	6	1	39	51	52	56	407	6	331	153	214	85	50	29	158	259	1	0	4	78	23	1	122	122	498	6	2
Planctomycetes bacterium ADurb.Bin126	27	217	42	103	0	291	2	61	7	106	3	11	124	27	40	1	4	921	435	321	71	208	9	0	56	70	75	48	610	5	1246	570	816	111	62	46	76	387	1	2	13	109	93	5	481	489	2545	13	3
Bacteroidetes bacterium GWA2_31_9	27	170	35	56	2	114	4	126	16	262	4	14	96	16	24	0	4	431	197	329	120	274	6	1	113	149	155	105	1184	2	692	268	349	225	156	93	305	720	3	2	5	166	60	2	211	185	880	25	10
Gammaproteobacteria bacterium TMED225	27	5877	990	2174	0	184	8	4019	787	8325	0	39	3488	664	818	0	0	723	292	419	3581	10403	1	0	2764	3214	4030	8031	29770	0	803	333	307	6261	3995	2710	13252	12498	1	56	63	6268	766	0	189	146	582	667	205
Siphonobacter aquaeclarae	27	53	4	21	0	58	2	32	8	73	3	5	44	4	9	0	1	198	88	132	29	71	2	0	37	40	32	62	341	0	263	89	142	55	42	30	111	168	1	3	4	80	28	1	81	76	534	7	3
Gemmata massiliana	27	69	23	35	0	90	1	17	1	26	3	2	34	3	11	1	5	266	150	152	30	64	8	0	20	21	28	19	196	3	424	195	227	39	32	25	27	117	1	3	2	46	36	3	162	159	721	7	3
Thalassobaculum litoreum	27	103	28	42	2	67	1	19	2	38	8	3	35	8	7	2	5	189	108	69	20	57	6	0	27	32	50	18	298	2	350	167	156	61	49	23	36	143	3	2	4	26	27	1	145	155	762	29	6
Euryarchaeota archaeon TMED103	27	1646	377	710	1	60	2	570	97	1168	0	16	715	133	147	0	0	206	73	351	461	1207	1	0	128	187	223	778	3892	0	240	91	113	199	156	123	597	1702	0	13	16	976	70	0	43	43	188	177	43
Magnetospira sp. QH-2	27	924	178	402	1	457	14	261	42	554	14	18	408	59	91	1	6	1604	733	310	303	718	11	1	283	359	425	307	3377	0	2016	867	983	710	477	327	621	1565	5	28	19	459	220	21	857	787	3484	71	15
Marinobacter lutaoensis	27	121	31	37	0	66	1	16	2	53	11	0	30	4	10	0	2	153	74	19	28	48	19	3	19	27	37	51	214	1	252	109	120	49	25	27	42	97	2	2	9	69	33	2	219	203	1511	44	17
Cytophagales bacterium WSM2-2	27	159	33	64	0	102	2	100	13	176	2	7	90	24	22	1	1	365	128	200	81	226	3	0	63	83	94	134	770	0	468	181	234	154	87	51	414	476	1	5	4	236	43	3	178	154	826	21	3
Alphaproteobacteria bacterium MarineAlpha4_Bin2	27	11476	2732	4704	0	819	22	1669	234	4237	17	35	3918	821	941	0	4	3074	1419	379	2324	5623	6	1	2661	3563	4156	530	40855	1	4714	2016	2520	7135	4609	3714	1184	21552	11	486	678	1217	3949	5	1416	1278	6518	634	161
Aquisphaera sp. JC650	27	111	25	50	0	142	5	19	4	44	3	25	56	13	13	1	3	491	246	524	41	104	7	1	26	39	46	22	248	4	763	331	493	65	27	25	24	152	1	5	11	42	59	2	234	228	1120	7	0
Bacillus coagulans	27	80	15	22	0	55	2	32	2	79	0	9	34	12	12	0	2	203	86	177	38	114	7	0	24	17	40	78	285	3	219	95	105	40	30	29	141	156	0	4	4	119	27	1	90	65	460	5	3
Chroococcidiopsis sp. PCC 6712	27	72	16	35	2	39	0	25	5	71	1	4	35	13	6	0	1	126	67	129	29	90	3	0	33	75	81	45	277	2	187	58	77	143	95	68	98	190	3	1	2	74	58	3	68	53	271	6	1
Verrucomicrobia bacterium LW23	27	152	27	55	0	156	5	53	8	90	4	13	104	15	19	0	5	508	223	317	53	167	7	1	47	46	71	58	505	1	736	304	402	117	70	45	116	295	1	5	3	95	51	4	306	266	1398	10	4
Prochlorococcus sp. HOT208_60m_813E23	27	2326	415	979	0	19	0	2732	485	5274	0	3	139	22	35	0	0	20	7	40	299	895	0	0	53	62	69	4	625	0	4	2	4	121	78	63	60	413	0	27	26	769	597	0	33	27	72	417	120
Flavobacteriaceae bacterium RR4-40	27	114	18	44	2	87	1	68	9	125	18	17	92	17	30	8	44	576	221	366	60	182	867	65	65	68	96	94	578	14	276	124	164	146	107	78	185	418	198	5	0	108	33	46	171	175	4370	20	7
OM182 bacterium	27	3460	647	1360	1	667	14	865	120	1804	5	17	1189	260	309	0	6	2585	1182	330	818	2161	8	0	377	545	655	604	5649	2	4917	2008	2157	850	578	405	900	2937	2	78	108	1411	889	2	1212	1099	5080	834	229
Aquificaceae bacterium	27	150	28	51	1	110	2	50	10	108	2	23	66	13	16	1	2	392	170	528	63	177	6	0	63	71	73	223	477	0	667	291	257	124	64	64	265	222	1	1	2	174	32	0	138	162	625	13	6
Coxiella sp. RIFCSPHIGHO2_12_FULL_44_14	27	137	25	60	1	116	3	62	12	165	5	11	76	11	21	1	5	435	216	402	73	210	5	0	55	61	84	126	558	7	492	214	239	127	93	64	308	235	1	2	1	216	40	1	218	172	861	17	9
Desulfobulbaceae bacterium	27	524	79	185	1	754	21	207	34	471	5	11	299	54	61	0	6	2298	1015	320	237	647	15	0	161	183	241	440	1908	3	3266	1335	1420	387	238	180	851	1035	2	14	17	586	181	2	1069	989	4412	50	14
Flavobacterium columnare	27	204	40	87	1	94	4	153	25	243	2	14	148	31	29	0	4	351	205	288	125	334	11	2	113	139	143	160	1294	7	465	205	271	281	197	144	392	832	3	2	4	225	69	1	150	124	1767	37	6
Gloeobacter kilaueensis	27	119	19	48	0	74	1	41	7	82	4	8	48	5	13	0	3	213	109	227	37	122	7	0	45	55	69	51	349	2	298	131	178	125	91	58	110	218	0	3	4	85	36	1	122	103	547	19	3
Cryomorphaceae bacterium BACL11 MAG-121001-bin54	27	1024	181	367	0	641	14	779	140	1548	0	20	605	129	126	0	0	1970	775	352	900	2524	1	0	1034	1249	1569	149	10914	1	5720	2311	2898	2060	1329	887	700	6569	0	17	20	84	201	1	1914	1496	4783	73	21
crAssphage cr10_1	27	0	0	2	3	0	0	3	0	3	0	9	0	0	0	1	5	1	1	258	0	2	5	0	2	2	4	0	2	3	3	0	3	7	5	0	5	2	1	0	0	11	0	0	4	0	5	2	0
Burkholderia sp. BDU5	27	5	0	1	0	0	0	2	0	3	0	2	3	0	0	0	0	2	3	36	1	4	0	0	1	0	3	1	7	0	4	2	5	2	0	2	1	1	0	0	0	3	0	0	1	7	6	1	0
Pseudomonas oryzihabitans	27	42	10	15	1	32	0	14	1	44	7	6	14	3	1	0	2	76	35	162	14	35	11	1	12	11	13	14	84	1	90	34	46	34	29	21	17	32	2	5	4	28	8	2	43	47	404	10	1
Arcobacter butzleri	27	123	16	58	0	144	5	101	23	198	2	11	93	11	18	1	2	431	201	267	84	227	10	0	77	90	110	157	788	0	628	243	258	183	118	98	423	412	1	3	1	183	50	1	191	142	746	33	7
Aequorivita vladivostokensis	27	39	8	19	84	58	3	22	3	40	1026	22	35	8	5	309	1672	413	158	233	25	58	3760	380	25	20	24	64	290	23	89	40	35	61	28	25	75	90	1590	1	2	267	35	5	54	51	3344	6	4
Nitrospinaceae bacterium VA-1	27	201	33	77	0	6408	186	70	8	148	2	8	299	58	79	0	3	21768	9480	189	194	512	2	0	244	307	367	317	3790	0	31854	12959	15926	697	421	330	730	1759	1	8	7	431	621	1	9502	8110	48106	13	7
Phycisphaeraceae bacterium TMED231	27	628	163	260	2	145	4	99	17	243	6	24	446	105	107	1	4	588	276	269	234	495	3	1	232	284	339	47	1381	1	1044	467	466	551	346	305	64	789	0	13	17	51	54	2	194	140	846	83	19
Flavobacterium psychrophilum	27	264	56	124	0	94	5	160	31	370	5	16	181	45	54	1	6	364	176	302	159	498	12	0	171	220	277	392	1604	5	455	196	212	403	286	167	666	891	4	2	10	452	160	4	156	151	5912	44	13
Pedobacter cryoconitis	27	99	27	52	1	60	4	54	12	146	2	17	67	25	19	2	2	281	107	384	60	172	12	0	54	70	75	107	614	2	348	127	144	131	83	74	225	335	0	5	2	114	39	2	121	102	836	10	5
Mariniblastus fucicola	27	474	86	180	1	439	22	111	13	215	6	26	284	63	67	1	6	1325	618	485	133	400	10	0	106	133	140	134	1432	4	2012	774	1232	302	202	142	226	870	2	31	47	199	373	9	610	598	3062	26	2
Bacteroidetes bacterium HGW-Bacteroidetes-17	27	164	30	68	1	95	1	89	18	222	4	17	101	16	22	1	1	402	165	531	89	281	6	0	96	114	134	128	952	1	535	224	268	212	123	83	281	599	0	3	5	206	46	2	187	159	786	20	5
Vibrio azureus	27	39	11	11	0	16	0	8	2	19	2	2	15	0	5	1	0	57	35	87	11	33	0	0	12	24	18	11	83	1	45	20	28	37	31	18	26	44	0	1	2	22	11	0	18	17	110	4	0
Phormidesmis priestleyi	27	296	83	117	3	155	4	104	21	216	6	17	116	28	32	2	3	407	199	366	110	279	6	1	159	168	244	118	960	5	554	238	249	467	293	214	222	562	2	13	14	177	116	2	202	193	988	41	11
Maricaulis sp. LZ-16-1	27	137	38	54	0	77	3	42	8	95	5	7	63	18	10	0	5	252	95	118	43	123	10	0	32	39	51	108	465	3	274	128	112	102	63	43	147	219	112	6	9	114	53	8	202	164	2153	135	26
Alcaligenes faecalis	26	107	26	56	1	81	2	40	4	72	5	9	43	4	10	2	8	173	91	143	41	89	22	2	51	46	53	40	309	1	273	89	142	111	64	44	101	158	4	4	7	62	24	2	114	92	530	29	5
Clostridium beijerinckii	26	110	17	44	0	106	9	82	17	156	2	19	79	13	21	0	2	387	141	372	76	215	4	0	67	71	94	162	623	2	512	193	210	156	104	71	362	316	2	3	4	228	39	1	186	137	647	8	7
Fabibacter sp. 4D4	26	452	69	179	0	166	1	143	23	258	3	16	177	30	38	1	4	590	279	444	151	445	6	1	76	93	115	234	991	5	641	261	341	193	128	76	494	563	7	2	4	212	66	2	239	174	1060	15	6
Bradymonadales bacterium V1718	26	570	117	236	0	347	18	121	16	272	1	7	215	45	54	2	2	1266	633	240	117	378	1	0	92	102	98	120	1000	5	1129	471	619	199	147	113	171	638	2	14	24	199	133	3	407	390	3330	29	14
Archangium gephyra	26	366	111	144	1	192	9	106	15	213	2	10	125	24	39	0	3	694	335	231	92	295	9	1	83	120	91	110	845	0	875	347	473	156	90	78	180	504	5	18	25	147	91	4	264	254	1895	25	10
Fictibacillus gelatini	26	46	12	11	2	31	0	20	0	52	2	12	17	1	5	2	3	94	41	253	25	63	0	1	7	13	17	32	126	6	110	44	59	37	24	19	79	57	1	0	0	60	5	1	44	35	174	9	0
Sansalvadorimonas verongulae	26	159	44	59	0	88	2	84	11	135	3	10	92	17	20	0	5	288	144	232	80	199	8	0	63	75	94	111	520	2	483	179	175	114	89	70	164	239	2	7	5	126	36	3	129	109	460	12	7
Nitrincola sp. A-D6	26	31	3	17	0	22	1	15	3	34	6	9	21	12	2	1	7	93	32	304	6	42	12	2	8	18	20	25	119	4	109	66	58	40	13	18	63	75	3	1	1	32	8	7	43	36	291	10	0
Skeletonema virus LDF-2015a	26	2	0	4	1	0	0	0	0	3	1	7	1	0	1	0	6	1	0	189	3	3	12	2	0	2	0	1	4	3	1	2	1	1	0	0	2	2	1	0	0	1	0	3	0	0	1	1	0
Muricauda sp. NH166	26	34	3	12	1	29	0	16	1	36	3	6	15	1	7	0	7	121	53	89	15	31	4	0	12	18	18	43	182	0	54	20	37	37	21	15	60	90	1	1	1	112	41	2	187	159	3406	5	0
Catabacter hongkongensis	26	54	14	26	2	25	0	22	5	69	6	16	20	9	8	0	3	89	42	303	32	84	1	0	25	23	29	59	245	0	128	56	68	52	36	26	129	100	1	3	2	91	19	0	45	29	164	6	4
Bacteroides fragilis	26	118	18	59	0	112	4	77	6	119	2	14	54	13	8	0	3	356	167	289	65	191	3	1	48	42	81	90	539	1	394	199	178	107	98	55	230	252	6	4	8	153	38	2	144	119	596	15	6
Synechococcus sp. RS9902	26	5642	1533	2365	0	67	4	1313	187	3479	2	53	4183	912	1014	0	1	223	111	702	1430	3394	5	0	229	317	381	42	1715	1	68	30	29	663	430	357	40	1513	0	8	26	100	99	0	20	22	77	94	17
'Candidatus Kapabacteria' thiocyanatum	26	80	19	39	0	98	3	35	4	77	1	10	47	14	11	0	3	313	136	208	29	122	4	0	29	31	45	81	339	1	346	180	204	76	44	32	158	172	3	2	3	123	35	2	134	104	641	6	1
Ochrobactrum phage vB_OspM_OC	26	22	2	6	0	13	0	9	0	11	3	8	5	1	1	0	3	51	13	359	13	25	8	0	2	7	3	8	16	3	105	33	34	14	8	4	15	24	5	0	2	16	0	0	39	31	101	3	0
Ichthyobacterium seriolicida	26	222	29	108	1	66	2	107	19	237	4	9	118	24	34	2	2	257	95	268	124	335	7	0	139	163	185	202	1360	5	379	162	173	266	166	122	532	802	2	2	8	161	54	1	90	87	388	21	7
Epibacterium mobile	26	254	65	101	2	1020	30	39	2	62	138	6	60	17	15	7	33	270	131	175	49	113	105	17	68	87	97	191	1123	15	423	231	382	376	256	247	113	848	47	6	12	103	42	11	368	377	2593	32	6
Algoriphagus sp. hg1	26	24	3	8	0	223	10	7	2	19	12	1	18	5	6	4	24	106	48	29	14	42	50	7	2	9	5	342	136	0	85	36	67	16	10	7	151	78	5	0	3	248	36	6	49	32	864	6	0
Acinetobacter sp. FDAARGOS_515	26	0	0	0	1	2	0	2	0	2	0	5	2	1	1	0	0	6	3	140	0	3	3	0	1	0	0	1	4	0	9	5	2	1	0	1	2	4	0	0	0	5	0	0	1	2	12	0	0
Desulfovibrionaceae bacterium	26	146	25	63	0	130	4	44	8	97	2	15	55	13	15	0	14	416	188	512	58	151	17	1	41	63	54	80	368	3	538	229	231	89	60	46	153	193	0	5	3	116	41	2	167	165	744	8	4
Mycetocola reblochoni	26	19	6	8	1	19	0	6	1	11	7	8	10	2	0	0	3	53	35	215	7	11	4	0	2	5	7	5	20	0	37	16	20	9	6	7	9	23	0	5	6	14	17	8	64	88	2467	6	1
Gloeomargarita lithophora	26	224	39	89	0	57	2	70	9	168	5	14	79	16	24	0	1	174	71	325	82	228	6	0	162	269	351	125	915	1	193	98	103	803	514	344	196	707	1	4	10	113	77	0	92	79	429	53	14
Brevundimonas sp.	26	286	52	113	1	178	4	109	18	203	11	8	156	26	42	2	5	718	403	270	103	291	27	3	95	118	127	166	865	2	663	255	287	231	144	109	266	448	4	4	10	212	77	11	278	249	1759	39	9
Verrucomicrobium spinosum	26	285	69	109	1	209	4	57	10	137	1	9	176	39	50	1	3	648	324	197	94	211	8	0	73	96	111	65	829	0	972	378	560	184	110	89	102	462	2	12	17	118	106	2	312	338	1643	17	2
uncultured SUP05 cluster bacterium	26	487	83	186	0	2909	97	237	36	465	4	10	389	64	85	0	2	11012	4755	210	256	657	0	0	237	291	353	816	2370	4	26378	10398	8780	553	341	236	1165	1207	2	10	23	677	110	2	3659	3103	13209	75	14
Cytobacillus praedii	26	11	3	4	1	24	2	4	0	9	2	8	5	1	2	1	4	77	25	145	5	19	2	0	8	3	9	18	52	4	83	34	81	9	8	7	25	21	1	0	2	12	8	1	56	40	262	1	0
Pseudomonas cremoricolorata	26	20	5	9	1	16	0	10	1	11	1	5	15	0	3	2	12	53	24	217	9	25	20	1	4	6	6	23	73	7	73	32	35	22	10	9	26	32	1	1	1	8	6	2	22	37	183	4	0
Bacteroidetes bacterium RIFCSPHIGHO2_02_FULL_44_7	26	162	31	52	0	80	4	118	20	205	0	7	106	28	24	0	2	296	119	203	81	267	2	0	83	104	105	67	820	0	416	180	221	180	109	73	196	585	1	2	2	70	50	2	138	120	643	17	2
Segetibacter sp. 3557_3	26	89	20	21	4	64	3	50	5	79	2	9	71	7	9	1	4	187	99	325	59	186	5	2	45	59	69	99	501	3	271	115	170	90	56	48	204	329	7	2	7	98	33	3	95	78	588	17	7
Armatimonadetes bacterium JP3_11	26	4	1	1	1	0	0	1	1	2	7	8	0	0	1	0	4	7	7	171	2	1	3	1	0	0	0	0	0	0	4	1	6	0	0	0	1	1	1	0	0	2	0	3	1	3	10	1	0
Paraburkholderia humisilvae	26	118	41	49	0	37	0	19	2	50	0	5	32	9	8	0	0	88	47	54	26	87	5	0	48	44	46	33	165	0	125	45	55	56	34	39	21	42	1	7	12	21	10	0	48	57	230	92	32
Pseudonocardiales bacterium	26	170	40	74	1	220	5	47	6	115	3	12	89	19	10	0	6	770	425	484	60	187	8	0	57	74	93	139	579	0	1135	512	506	139	84	78	202	272	2	7	10	147	52	1	385	345	2028	32	9
Stieleria neptunia	26	200	28	83	0	179	3	35	4	90	2	10	108	27	26	1	3	518	262	167	57	155	5	1	36	41	59	49	540	3	807	349	448	92	54	42	83	321	1	5	9	72	80	0	264	246	1368	5	5
Jiulongibacter sediminis	26	132	31	65	0	105	2	94	19	151	4	17	93	22	25	0	5	333	149	311	75	267	4	1	73	87	98	141	871	2	462	194	242	160	87	59	383	513	3	8	5	189	39	2	162	118	707	20	3
Phycisphaera sp. TMED24	26	2139	568	913	3	120	3	283	44	685	6	64	2071	469	546	0	4	1050	562	624	1088	2542	7	0	32	38	56	23	469	2	424	205	224	74	47	37	63	419	0	7	4	64	40	2	124	101	479	75	24
Aestuariispira insulae	26	922	184	336	0	491	21	313	65	657	76	16	460	96	107	4	16	1706	804	350	346	926	41	4	282	358	458	531	3238	1	2481	941	987	713	459	345	887	1619	77	21	34	644	278	27	804	761	3666	70	24
Bacteroidetes bacterium 4572_117	26	122	26	60	0	59	2	77	7	150	1	12	63	13	13	1	1	271	109	252	66	190	1	0	76	82	110	79	708	0	324	158	199	146	92	66	251	413	0	4	6	107	31	1	111	95	512	13	8
Moumouvirus	26	128	30	40	0	49	1	52	7	98	2	14	36	9	13	1	3	121	68	372	65	185	9	0	37	65	68	28	291	1	159	76	78	99	60	36	213	182	2	6	7	155	40	2	84	79	262	23	8
Hyella patelloides	26	166	27	53	0	96	3	53	8	100	3	6	60	12	10	0	0	214	80	333	56	128	7	0	43	75	85	92	417	0	259	93	111	135	75	65	132	225	0	1	6	116	46	0	120	104	505	24	5
Bradyrhizobium sp. Ai1a-2	26	56	7	22	2	37	2	16	2	46	4	14	22	4	5	0	5	121	50	208	23	64	8	1	17	23	34	35	211	5	147	63	49	53	40	20	47	86	4	3	3	39	13	4	53	45	261	4	3
Sphingobacteriia bacterium	25	108	16	51	1	86	3	59	10	103	1	8	73	13	16	0	4	317	117	179	58	181	7	0	65	73	76	74	576	1	376	138	227	111	62	65	167	312	0	0	3	91	27	1	136	121	569	13	3
Chthoniobacter flavus	25	366	86	175	0	307	13	92	10	195	3	6	213	36	57	0	3	1018	474	228	102	329	7	1	61	81	115	96	993	3	1438	608	835	210	128	111	186	582	0	15	28	140	142	1	503	462	2620	27	5
Changchengzhania lutea	25	101	19	43	0	34	0	66	11	106	8	13	75	9	11	1	8	184	62	218	52	150	7	1	46	52	66	71	496	4	179	73	118	93	73	43	152	327	6	1	4	70	28	2	68	79	1164	9	12
Thiotrichales bacterium SG8_50	25	150	24	70	1	151	1	72	14	143	7	25	84	17	23	2	12	464	220	713	79	202	35	3	37	69	70	141	485	3	735	314	309	102	55	51	203	243	2	4	5	162	44	2	266	251	1135	11	3
Chlorobium sp.	25	350	64	124	3	429	14	179	38	369	7	13	209	39	34	1	7	1400	568	496	172	486	4	0	140	178	217	416	1834	2	1793	784	856	341	259	167	773	904	2	12	12	486	128	2	586	491	2471	27	12
Mesorhizobium sp. WSM4312	25	3	0	0	1	7	0	1	0	1	0	3	0	1	0	0	2	5	4	81	0	1	3	1	0	3	1	1	12	0	6	4	0	3	2	1	3	6	0	1	0	2	0	0	4	3	31	0	0
Rhizobium sp. CFBP 8762	25	98	19	36	2	31	1	35	8	65	2	8	43	11	10	1	1	121	53	219	42	130	0	0	33	39	58	45	336	3	111	56	56	73	50	36	101	143	6	1	2	48	14	0	74	50	772	6	4
Fibrella aestuarina	25	69	10	44	1	70	1	38	6	75	3	12	38	9	11	0	12	237	105	305	41	101	9	2	37	42	41	72	338	2	262	100	127	63	44	26	152	174	3	2	3	72	27	2	106	87	458	8	2
Aquisalibacillus elongatus	25	23	5	14	0	13	0	7	3	17	1	8	7	0	0	0	5	58	30	137	8	31	7	1	3	4	12	11	53	0	85	38	48	10	4	3	28	34	1	0	1	27	11	0	23	21	93	1	1
Candidatus Terasakiella magnetica	25	711	126	327	1	313	6	297	49	642	11	23	293	55	74	0	5	1056	475	425	248	668	13	2	281	372	412	409	2778	2	1387	559	617	722	440	324	717	1418	11	7	24	545	202	5	523	451	2282	68	17
Thalassospira povalilytica	25	44	11	15	0	22	1	18	5	43	9	1	16	1	4	0	6	89	34	15	14	38	1	0	13	21	18	19	179	0	64	44	86	33	16	19	50	100	2	7	8	71	72	0	697	694	4597	26	10
Phaeobacter inhibens	25	129	21	51	4	75	7	78	5	90	22	15	77	12	22	5	12	303	138	345	62	152	22	3	61	75	78	62	639	1	515	204	192	160	107	67	149	335	13	2	2	95	24	8	143	109	1074	12	6
Anaerococcus hydrogenalis	25	225	34	103	0	22	0	64	11	124	6	6	69	18	25	0	3	71	33	217	54	166	4	1	36	44	67	184	354	2	91	39	36	89	55	36	143	131	2	0	2	145	12	2	30	20	103	14	2
Microcystis wesenbergii	25	18	6	11	0	14	1	4	0	8	3	4	7	1	1	0	1	38	21	103	5	13	3	0	15	16	22	5	71	1	51	19	23	40	21	13	17	29	0	1	2	11	6	0	19	22	139	4	1
Candidatus Falkowbacteria bacterium	25	46	9	20	1	46	0	26	5	29	2	11	24	3	8	0	1	88	46	288	26	66	3	0	19	14	20	30	175	3	146	64	56	37	24	17	90	81	0	1	0	76	12	2	50	42	219	7	3
Devosia sp. 67-54	25	115	24	44	1	66	0	59	4	112	0	3	55	15	9	0	2	196	85	163	49	145	6	2	30	43	53	77	383	1	255	118	130	93	66	48	117	161	2	2	3	124	22	1	104	83	486	10	1
Pedobacter sp. BAL39	25	41	5	16	0	22	0	20	3	59	4	6	17	3	3	0	2	75	30	244	20	56	5	2	14	15	14	29	155	1	94	37	45	41	21	8	52	73	4	3	2	31	10	2	41	34	234	4	0
Mycobacterium sp. PYR15	25	19	3	8	2	1	0	17	2	22	3	16	6	2	1	0	8	12	3	429	6	27	4	0	6	2	7	7	12	0	21	7	4	7	9	11	12	9	0	2	2	21	4	5	4	2	39	3	0
Leptolyngbya sp. Heron Island J	25	84	20	43	0	72	5	27	5	56	2	8	38	7	10	2	6	205	97	185	23	72	10	0	48	60	70	45	286	1	230	105	112	146	82	49	84	177	0	1	3	57	27	2	108	107	412	7	3
Salinibacter ruber	25	114	35	45	1	106	2	54	8	80	4	12	55	12	12	3	2	372	169	200	49	115	4	0	49	54	67	72	369	3	437	152	247	106	61	58	153	168	1	4	3	106	24	1	153	160	782	14	3
Gammaproteobacteria bacterium 42_54_T18	25	256	50	95	1	154	3	86	20	190	3	13	113	22	26	0	6	523	230	248	113	291	7	0	85	97	110	314	839	4	781	338	350	155	101	63	345	403	3	4	9	209	65	0	267	213	1034	24	7
Alphaproteobacteria bacterium TMED109	25	3702	617	1484	0	267	8	2144	401	4448	0	39	2850	561	690	1	1	777	317	463	3374	9352	1	1	1211	1263	1606	1533	17477	3	2636	1009	1169	3027	1982	1387	6099	5556	0	87	133	5255	2049	1	466	408	2228	29	10
Agrobacterium virus Atuph07	25	35	4	27	1	15	0	14	1	27	0	12	11	1	2	3	6	39	19	410	20	50	4	0	5	11	9	23	25	3	85	34	40	21	7	6	31	29	3	2	3	14	1	3	29	18	86	2	1
Marinobacterium rhizophilum	25	94	25	30	0	97	0	32	10	78	5	5	54	6	19	1	6	308	143	162	45	102	7	0	37	53	58	74	346	1	483	210	197	75	51	39	134	162	2	1	1	79	21	3	167	167	778	11	2
Gammaproteobacteria bacterium TMED236	25	5347	895	2055	0	469	16	2925	521	5864	3	39	3641	630	884	1	1	2109	896	565	3403	9685	8	2	3603	4329	5431	25147	38477	3	4437	1681	1284	8434	5438	3690	22456	20194	2	26	47	5035	431	2	464	398	1479	591	165
Parachlamydia acanthamoebae	25	83	16	28	0	64	1	27	3	56	2	11	32	9	10	1	2	241	84	405	32	113	4	1	28	39	31	45	262	2	293	126	149	71	53	31	89	138	1	2	4	92	37	2	110	99	735	7	2
Candidatus Gottesmanbacteria bacterium GW2011_GWB1_49_7	25	10	2	7	1	10	0	4	2	13	5	16	4	0	0	1	4	24	17	227	2	9	3	0	6	6	11	15	51	2	28	18	20	10	7	4	20	19	2	0	1	21	1	2	22	21	67	1	0
Mesorhizobium sp. M7A.F.Ca.CA.004.02.1.1	25	2	1	1	1	0	0	0	0	6	3	5	1	0	0	3	5	3	1	108	1	3	5	0	2	1	1	0	6	1	3	0	1	7	1	1	3	0	1	0	1	2	0	1	0	0	3	3	0
Rhodospirillaceae bacterium TMED63	25	1628	309	662	0	56	1	364	45	805	1	11	628	111	136	1	4	216	78	165	400	977	2	0	184	238	264	497	2577	5	391	166	196	447	264	217	587	1127	0	13	30	521	254	7	84	99	420	92	19
Cryomorphaceae bacterium MED-G14	25	3621	557	1436	0	108	0	3227	597	6649	0	98	5117	1007	1191	0	3	456	177	724	3909	11299	2	0	2676	3185	4010	5283	28679	1	743	297	446	7249	4629	3139	13057	18019	0	25	41	1511	495	0	103	87	382	476	148
Haliangium ochraceum	25	364	116	169	0	306	7	104	17	203	0	14	184	48	42	0	4	1205	533	199	109	279	4	0	71	117	126	159	921	2	1372	649	739	189	119	96	174	557	11	19	22	159	107	0	492	494	2634	32	9
Poseidonocella sp. HB161398	25	111	25	39	2	60	2	41	5	83	12	13	82	12	8	1	9	266	117	274	51	134	16	3	34	32	54	48	405	3	216	89	97	72	36	36	99	171	6	3	5	92	23	12	113	126	1007	12	6
Alteromonas australica	25	79	9	28	0	1111	27	8	1	19	26	82	1291	254	288	2	24	35865	15733	47	5	13	32	3	3994	5417	6436	47801	10002	11	21859	22321	1905	20352	13161	8989	31889	9685	4	670	1022	1191	1462	2	7301	6383	41617	154	40
Olavius algarvensis Delta 1 endosymbiont	25	300	64	108	0	386	16	92	15	206	1	9	125	22	30	0	1	1220	562	168	108	275	3	0	124	103	131	206	934	0	1328	575	609	197	138	89	306	484	2	12	10	228	76	0	578	527	2110	39	9
Candidatus Woesearchaeota archaeon B3_Woes	25	45	4	11	0	68	1	12	4	34	2	11	21	4	7	0	6	160	70	273	21	84	2	1	15	25	23	37	125	1	140	62	63	32	27	21	69	54	0	2	1	64	11	4	87	74	278	6	0
Thiotrichales bacterium HS_08	25	206	31	81	1	168	4	71	18	172	5	11	119	14	27	0	4	599	286	134	83	233	1	0	73	91	85	275	598	2	808	353	362	148	93	70	277	314	1	5	5	216	50	1	267	253	1090	23	7
Ruminococcus sp. NK3A76	25	70	14	37	2	17	0	25	1	38	2	7	11	2	6	0	1	38	10	262	21	41	2	0	12	8	17	7	63	1	57	16	21	27	13	9	33	38	0	3	1	55	12	0	19	11	64	10	3
Cupriavidus metallidurans	25	16	2	5	2	14	1	8	0	18	4	5	10	3	1	1	3	70	23	144	7	21	11	0	10	11	12	26	80	2	78	44	40	21	13	11	26	39	3	1	1	41	3	2	43	32	220	6	0
Ruegeria atlantica	25	368	86	160	1	276	2	144	18	310	23	5	242	47	44	1	3	988	463	147	142	373	14	1	192	219	272	218	2171	2	1456	647	589	466	306	208	426	1043	14	3	13	237	95	7	442	380	2467	49	15
Pasteurella multocida	25	120	27	43	4	61	2	47	7	110	10	12	56	8	11	0	11	176	58	252	36	110	21	3	63	82	77	73	317	3	226	97	103	99	73	48	100	155	4	4	1	93	18	2	79	87	844	24	7
Synechococcus virus SRIM8	25	39	8	16	1	0	0	22	2	34	3	35	14	3	1	1	2	3	1	1141	22	50	7	3	6	12	15	26	31	1	3	0	1	19	12	8	23	36	0	2	1	27	4	1	0	3	6	6	2
Vibrio phage phiVa1	25	21	3	10	0	0	0	2	2	18	1	10	2	0	0	0	2	21	3	335	11	14	4	0	7	9	9	22	25	2	27	9	6	19	11	1	27	13	0	3	5	51	3	3	9	6	37	0	0
Methylococcaceae bacterium	24	327	59	132	1	303	7	137	23	313	4	11	178	26	46	1	0	956	392	225	139	371	17	0	128	130	170	414	1146	0	1349	552	572	273	128	123	476	599	5	9	7	321	103	4	391	377	1744	26	4
Brachyspira sp. CAG:700	24	63	16	18	0	27	3	18	1	32	0	8	2	1	3	0	0	73	41	57	12	31	0	0	34	33	44	12	123	0	72	30	11	57	38	30	11	10	0	6	8	12	8	0	46	50	59	56	15
beta proteobacterium AAP99	24	88	16	23	0	63	2	26	8	51	4	5	38	9	4	2	2	195	109	268	35	111	6	2	16	24	20	55	207	5	225	97	98	65	37	25	91	109	4	0	3	78	16	3	67	75	335	10	3
Colwellia sp. BRX10-3	24	38	10	17	0	26	2	33	3	59	0	17	12	7	3	0	0	96	43	371	16	69	2	0	10	14	21	30	124	0	179	61	82	33	24	11	56	81	0	0	3	47	7	1	48	41	195	8	3
gamma proteobacterium symbiont of Ctena orbiculata	24	309	52	123	0	294	6	108	15	229	4	10	157	31	31	2	9	1017	434	299	134	313	13	1	104	106	117	296	868	1	1436	564	666	190	144	91	401	406	6	7	6	338	77	4	432	367	1978	28	7
Candidatus Thioglobus sp.	24	1516	297	595	2	5608	137	411	73	848	6	24	1577	317	387	2	6	19205	8592	461	514	1407	8	3	2383	3093	3665	1104	31331	1	41275	17107	16262	6285	3923	3182	1650	15715	3	20	36	977	746	3	8541	7697	37174	85	21
Synechococcus phage ACG-2014a	24	29	2	10	1	0	0	12	3	21	6	15	12	4	2	2	8	4	1	703	12	47	6	0	3	19	14	9	23	1	1	0	1	30	13	7	25	21	2	0	1	18	2	0	0	1	0	1	0
Angulomicrobium tetraedrale	24	50	9	25	1	49	2	12	3	36	4	7	24	12	7	0	4	184	88	170	14	47	7	2	11	17	30	36	217	0	210	80	92	47	42	33	64	128	1	1	2	32	19	2	77	65	486	7	1
Chlamydiales bacterium STE3	24	98	22	34	0	46	2	41	4	70	3	16	38	5	13	1	0	140	63	370	39	105	3	0	23	41	42	47	249	1	186	78	139	66	47	27	89	131	0	0	3	126	30	1	64	82	429	10	5
Stappia indica	24	111	23	47	1	51	0	40	7	81	1	5	72	6	14	0	2	213	90	72	41	186	5	0	47	37	54	60	949	5	153	68	87	113	64	76	98	401	27	1	6	115	31	11	146	162	2212	31	7
Spirosoma sp. BT702	24	100	10	23	1	61	1	44	9	79	4	10	39	4	11	0	6	219	109	338	47	70	9	0	26	35	39	51	253	3	258	116	158	56	32	20	116	138	5	1	4	93	22	1	120	101	483	5	3
Xanthomonas phage Xoo-sp13	24	19	2	7	3	1	0	3	1	15	3	17	9	2	1	0	5	10	3	475	6	27	12	0	4	6	3	1	27	3	11	12	6	13	7	6	12	20	2	1	2	20	3	4	25	8	32	3	0
Leptospira sp.	24	153	31	61	0	93	2	77	17	119	1	4	94	14	16	0	0	363	174	87	79	215	0	0	67	97	100	182	726	0	485	217	228	155	98	83	345	337	0	4	5	195	41	0	163	121	649	6	3
Bradymonas sediminis	24	342	77	136	4	277	10	69	12	153	4	15	116	24	27	1	7	959	451	364	104	205	11	2	55	81	109	147	656	5	962	412	566	151	94	73	170	391	3	8	20	250	105	2	374	323	2241	17	4
Mesorhizobium sp. AA22	24	4	1	3	0	4	1	2	0	7	5	6	2	0	0	0	6	7	4	233	1	3	11	1	1	4	6	4	19	6	6	3	7	8	4	4	2	8	7	0	1	7	1	7	9	5	39	1	0
Candidatus Handelsmanbacteria bacterium RIFCSPLOWO2_12_FULL_64_10	24	695	153	301	0	1992	63	138	22	292	3	14	341	68	102	0	4	5952	3025	231	230	581	2	1	82	112	150	193	1719	3	7479	3297	4955	190	98	84	291	906	0	39	57	684	645	3	3987	3859	17640	30	8
Clostridium sp. CAG:524	24	27	5	14	1	11	1	8	3	25	4	11	13	2	1	0	3	28	19	277	21	49	2	0	9	15	18	8	53	0	51	20	29	13	12	12	39	42	1	0	0	35	10	0	22	10	58	3	0
Bacillus sp. Y1	24	12	2	4	0	10	0	9	1	12	5	7	7	2	7	0	5	22	13	224	8	15	10	0	5	10	10	16	56	1	33	12	20	16	7	11	38	17	1	0	1	38	3	1	17	13	51	1	0
Serratia fonticola	24	47	9	26	0	52	1	18	3	36	4	8	24	5	5	1	6	125	70	229	16	69	11	0	10	27	30	26	152	1	176	71	92	37	24	17	51	86	2	1	1	53	9	3	85	64	421	5	0
Gammaproteobacteria bacterium TMED107	24	2946	546	1221	0	917	32	696	153	1462	14	19	1323	250	308	1	9	3496	1612	188	811	2277	18	2	306	424	506	528	5028	0	7089	3018	3599	795	581	390	672	2668	6	81	102	1176	928	3	1559	1331	6791	622	159
Legionella pneumophila	24	343	70	137	1	332	9	149	20	304	5	5	167	35	48	3	17	1017	439	190	141	398	23	3	117	148	188	313	1545	1	1353	576	636	330	210	144	573	953	8	18	26	415	141	7	702	597	3755	51	23
Roseivirga pacifica	24	669	106	273	0	1411	47	270	37	579	4	18	413	70	87	1	5	1460	643	565	326	870	18	0	169	210	248	509	2239	0	1226	458	645	434	259	172	1194	1408	1	11	19	614	221	7	1118	983	3702	56	18
Aquimarina sp. TRL1	24	142	25	57	1	53	1	98	12	167	5	17	129	19	32	1	5	204	92	454	63	218	13	1	85	113	118	134	972	8	324	133	208	180	115	92	311	598	2	1	2	142	47	1	81	69	1148	27	4
Freshwater phage uvFW-CGR-AMD-COM-C493	24	3	3	1	5	0	0	0	0	3	4	16	6	0	1	5	8	4	2	300	3	7	21	4	0	2	3	0	6	2	13	5	8	5	1	5	2	9	2	0	1	12	2	1	2	2	3	0	0
Bradyrhizobium erythrophlei	24	289	58	125	0	305	6	147	21	235	10	13	182	26	26	3	5	960	409	296	137	335	14	0	119	125	170	199	1066	4	1246	547	566	232	141	105	338	503	9	7	14	256	82	8	518	471	2563	35	13
Flavobacterium sp. BFFFF2	24	112	19	41	1	47	0	65	6	119	8	5	46	18	13	1	6	162	76	176	36	125	5	1	56	53	76	74	477	2	244	85	115	91	66	57	171	319	4	1	1	71	34	0	89	65	503	18	4
Pseudoflavitalea sp. G-6-1-2	24	72	14	24	1	35	0	26	5	56	5	8	37	9	7	1	7	120	52	225	26	108	8	0	23	28	47	61	242	1	149	52	83	40	29	27	118	139	2	0	1	57	18	4	53	50	263	4	3
Phenylobacterium sp. RIFCSPHIGHO2_01_FULL_70_10	24	74	12	36	1	53	1	25	6	72	10	11	49	5	16	9	61	298	175	210	41	86	59	9	22	25	27	47	217	4	164	64	48	52	41	18	66	104	1	4	4	104	28	2	76	61	1193	15	2
Alphaproteobacteria bacterium MarineAlpha5_Bin3	24	2472	410	915	1	9565	310	1661	290	3340	2	13	1748	340	437	0	4	31069	13107	325	1814	5275	4	0	1612	1901	2440	3246	18840	2	38912	15604	13989	4092	2551	1655	11334	6393	2	30	39	4865	698	2	11915	9505	39633	140	44
Flavobacterium sp. CYK-4	24	43	15	23	3	28	0	31	3	74	4	9	48	5	15	2	4	112	39	162	46	99	2	0	34	30	43	66	324	4	126	58	71	66	59	36	124	193	5	2	1	36	16	1	38	43	526	10	5
Ilyobacter polytropus	24	88	18	28	2	77	0	39	4	77	1	9	42	13	17	0	1	257	93	196	41	98	3	0	38	30	50	98	288	1	284	128	128	83	46	35	156	145	0	2	3	121	34	0	108	87	403	6	0
Synechococcus sp. LTW-R	24	216	41	77	1	32	2	106	23	208	0	19	219	46	39	2	6	118	39	525	78	177	10	2	109	127	153	28	830	1	121	46	57	259	151	109	98	660	0	12	18	86	208	1	28	44	151	12	1
Pelagibacteraceae bacterium GOM-A4	24	7575	1224	2931	0	950	33	5885	1140	12016	0	50	4346	837	1007	0	0	3185	1291	964	4588	13865	0	0	1884	2134	2659	4622	16492	0	4776	1891	1296	4590	2878	1996	14346	6030	0	93	137	13857	1264	0	975	782	3290	1382	429
Pseudoalteromonas sp. THAF3	24	3	2	4	1	1	0	3	0	7	1	7	1	0	1	0	3	8	3	170	1	6	3	1	4	3	6	2	41	5	36	16	18	11	4	2	7	27	0	2	0	10	1	1	4	6	65	0	0
Proteobacteria bacterium TMED72	24	909	249	414	0	1222	40	194	36	420	0	50	1172	220	258	0	0	4098	2080	388	781	1872	2	0	254	312	359	371	2523	0	4099	1884	2037	451	301	231	497	2030	2	43	72	385	301	2	2311	2309	10214	31	13
Pseudomonas gallaeciensis	24	14	3	3	1	20	2	5	0	6	8	6	196	40	42	23	85	49	18	31	1	15	648	84	48	47	42	1698	4051	8	595	456	3631	99	64	83	567	1434	7	68	85	347	770	2	5483	5350	70546	56	7
Chlamydia abortus	24	48	10	23	0	49	4	7	2	28	11	9	29	2	6	0	1	138	89	100	22	53	3	0	19	16	25	30	169	0	148	68	98	50	16	23	23	45	0	4	3	23	9	0	75	71	324	11	6
Providencia rettgeri	24	42	4	21	2	39	3	17	2	52	9	4	28	2	11	3	8	126	48	270	21	68	16	3	21	31	43	60	315	3	173	77	79	67	36	29	100	134	2	2	1	45	12	3	110	79	531	13	1
Marinoscillum sp. 108	24	250	62	102	1	175	5	126	22	284	5	14	161	34	34	0	6	622	266	398	167	418	14	2	120	119	160	310	1444	3	2572	987	395	343	223	168	933	827	18	25	28	2690	263	14	1802	1556	5282	51	17
Oxalobacteraceae bacterium	24	219	59	103	0	100	2	61	11	120	5	8	117	12	17	1	3	409	180	426	80	214	15	2	73	94	128	85	648	5	449	179	241	165	114	101	154	337	2	4	9	117	49	7	170	151	1128	30	8
Parcubacteria group bacterium Gr01-1014_91	24	33	6	11	0	66	3	13	2	44	3	15	14	2	3	0	5	214	96	239	16	72	8	0	22	30	20	37	195	1	241	88	88	34	35	10	83	73	2	3	1	101	16	3	90	60	352	4	2
Pseudomonas virus pf16	24	14	1	8	1	2	0	5	0	16	1	26	4	1	1	0	2	7	5	405	2	25	7	1	10	5	10	5	23	5	34	13	14	14	10	4	24	19	3	1	4	36	1	3	16	15	37	3	0
Moraxella catarrhalis	24	135	17	41	1	48	4	50	8	67	4	13	40	8	9	0	2	170	83	262	35	116	16	1	21	34	39	71	250	2	301	142	129	73	45	38	84	106	3	2	3	77	23	6	115	93	569	19	4
Methylomonas methanica	24	116	22	55	0	87	4	58	5	100	3	26	54	17	12	1	3	248	130	581	55	153	8	2	53	47	79	130	443	2	385	165	159	152	72	64	203	241	5	6	5	116	37	1	138	100	546	17	2
Candidatus Margulisbacteria bacterium GWF2_35_9	24	125	20	45	0	74	3	59	14	100	0	6	61	12	11	1	2	288	123	151	63	170	4	0	56	60	100	133	576	1	303	114	148	109	91	50	319	314	0	0	4	163	44	0	107	77	406	9	2
Sinirhodobacter populi	24	139	25	38	0	65	2	30	12	90	11	9	66	16	16	0	5	307	140	244	36	138	14	1	35	47	39	44	432	4	168	92	95	78	62	38	111	224	5	7	7	82	36	4	105	122	1108	13	5
Sphingorhabdus rigui	24	55	8	21	0	1	0	16	1	56	3	13	9	1	2	0	2	25	18	321	9	43	3	0	9	19	24	16	70	0	22	11	13	25	13	15	41	35	1	1	1	44	5	0	10	7	62	5	0
Hydrotalea sp. AMD	24	13	2	4	3	5	0	7	1	15	5	8	2	0	1	1	5	18	6	359	7	9	11	1	7	7	7	5	31	1	16	6	12	8	7	3	17	22	0	1	0	14	3	0	3	10	24	1	0
Acinetobacter soli	24	26	6	12	0	13	0	16	5	33	0	2	14	1	1	1	4	70	19	137	15	45	1	0	15	18	14	29	99	1	109	41	30	22	15	6	52	41	1	0	4	58	8	1	29	20	137	6	2
Alphaproteobacteria bacterium GWF2_58_20	24	142	33	45	2	71	2	58	7	128	7	7	80	20	21	2	7	233	118	226	72	183	13	2	53	67	61	65	522	6	236	109	134	137	80	64	203	234	3	2	3	139	40	3	100	102	418	8	5
Pelagibacteraceae bacterium TMED258	24	11122	1789	4411	0	528	10	6235	1088	12503	0	57	4927	938	1132	0	2	1764	734	1039	4684	13548	5	0	3717	4354	5346	16555	33146	1	3485	1329	1042	9174	5777	3966	26052	16888	0	64	127	20026	790	1	468	412	1696	1149	333
Hymenobacter edaphi	24	19	3	11	0	12	0	4	1	13	4	6	8	1	1	0	0	42	23	147	5	11	5	2	3	3	5	1	39	3	68	36	36	12	6	7	11	13	2	0	1	7	2	0	31	32	121	3	2
Pseudoalteromonas sp. S326	23	3	0	0	3	1	0	1	0	1	4	6	2	0	0	0	4	3	1	211	0	2	4	1	1	0	2	6	140	4	8	7	28	7	1	0	0	127	2	1	0	3	1	2	5	2	10	1	1
Candidatus Phaeomarinobacter ectocarpi	23	703	124	284	0	172	7	328	57	564	9	3	319	56	65	1	7	653	268	227	299	836	11	2	212	276	308	649	2076	2	898	398	360	453	304	202	878	897	2	7	9	687	108	27	259	226	1203	32	10
Kordia algicida	23	192	37	72	1	60	1	127	18	232	8	28	128	32	25	4	11	209	78	489	106	282	17	2	94	126	149	215	1116	2	254	99	116	235	138	100	324	692	4	4	3	133	46	2	85	62	856	31	7
Consotaella salsifontis	23	109	14	46	0	66	2	47	11	123	5	5	60	17	20	0	2	246	113	62	51	118	3	0	36	51	59	88	488	0	305	159	120	99	70	44	171	165	7	2	2	111	26	12	116	116	1278	6	6
Variovorax sp. KK3	23	46	8	19	0	32	1	16	3	17	1	8	20	5	4	2	3	107	53	328	14	44	13	1	10	19	19	21	143	2	169	73	75	31	18	17	41	56	0	1	3	24	14	3	50	51	268	3	0
Azospirillum sp. TSA2s	23	30	2	7	3	16	1	12	5	23	3	5	13	1	9	0	7	64	30	189	12	28	7	1	5	15	16	10	87	2	107	53	49	19	24	8	40	58	4	3	3	32	7	2	42	40	212	3	0
Burkholderia stagnalis	23	60	21	27	0	29	2	18	2	39	1	9	22	8	6	1	3	89	52	157	18	41	7	1	26	27	37	17	93	0	108	66	45	41	35	35	17	32	0	2	9	28	11	4	63	38	205	32	6
Megasphaera sp. SW808	23	2	1	0	3	3	0	2	0	2	1	10	0	0	1	0	8	13	8	202	2	2	10	1	2	2	1	0	5	2	19	8	12	2	5	1	3	1	1	0	0	2	0	2	8	11	21	1	0
Bacteriovorax sp. DB6_IX	23	186	31	90	0	134	7	69	16	130	4	24	82	16	18	0	5	426	178	614	78	251	5	0	53	70	71	600	630	0	541	211	192	139	70	66	391	222	2	4	15	255	90	3	197	194	764	12	2
Nonlabens virus P12024L	23	3	1	1	0	1	0	0	0	1	2	6	1	2	0	0	8	2	0	146	2	1	6	1	2	1	1	1	2	1	3	1	2	5	3	2	1	3	0	0	2	7	0	0	3	0	3	0	1
Gammaproteobacteria bacterium TMED30	23	5157	946	2096	0	563	12	1353	209	2819	2	14	1545	360	413	0	5	1843	823	201	1048	2702	5	2	465	662	748	1008	6758	0	3132	1317	1269	1106	719	531	1273	3484	1	105	135	2312	942	1	920	774	3552	963	237
Pararcticibacter amylolyticus	23	37	14	14	2	56	2	37	6	76	4	10	35	8	6	0	5	176	80	232	40	104	6	1	35	38	60	41	404	4	246	84	111	85	48	36	136	263	1	2	4	50	22	3	77	68	405	4	1
Limibacillus halophilus	23	603	119	270	0	558	19	211	35	472	25	13	301	74	73	3	9	1781	822	291	220	642	14	2	197	268	297	324	2423	8	2348	984	984	556	351	225	696	1227	16	8	21	463	208	11	781	666	3542	49	16
Planctomycetes bacterium CA13	23	423	101	167	1	319	8	75	10	193	6	12	284	55	77	0	1	1021	480	201	135	327	5	1	87	116	148	61	1341	2	1614	644	991	245	141	104	99	807	0	18	21	93	167	3	510	466	2506	19	3
Armatimonadetes bacterium	23	296	79	129	1	443	10	99	16	232	4	19	155	40	37	0	5	1432	728	362	142	301	13	1	79	94	131	239	958	2	2033	872	1032	201	125	86	343	508	2	6	13	406	137	2	671	621	3205	16	4
Cecembia calidifontis	23	51	15	27	1	37	3	36	5	77	5	6	45	8	8	0	6	198	69	133	34	111	5	1	36	20	28	76	345	4	208	87	134	63	31	34	211	208	0	1	2	138	22	3	69	60	340	8	5
Leptospira interrogans	23	92	11	31	0	102	2	53	8	94	2	8	45	10	4	0	6	311	133	182	36	105	3	1	38	49	66	96	389	1	385	158	191	98	65	36	175	204	0	2	2	92	19	1	159	126	617	9	4
Mesorhizobium sp. Z1-4	23	147	31	58	2	68	1	71	4	151	5	8	73	18	22	1	9	258	129	274	78	207	7	2	48	52	68	127	592	5	311	137	157	137	70	52	222	255	3	2	5	181	29	42	128	135	3377	20	3
Burkholderia contaminans	23	42	21	21	0	31	1	10	2	13	2	7	16	3	1	0	1	76	40	83	13	25	3	0	13	20	15	22	95	1	81	36	37	30	20	21	30	38	0	1	2	14	5	1	48	39	229	14	4
Chromatiales bacterium (ex Bugula neritina AB1)	23	1948	378	796	1	1240	26	759	114	1467	7	19	939	192	227	3	3	3952	1825	283	712	1886	6	1	589	694	819	891	7109	2	6483	2719	2669	1449	999	630	1610	3550	5	25	31	1133	397	6	1771	1573	7437	185	47
Elizabethkingia anophelis	23	64	9	21	1	50	2	28	7	56	1	3	44	7	10	0	3	168	72	211	31	75	1	1	33	31	34	51	207	4	201	75	75	59	34	28	105	127	3	2	1	77	11	3	64	56	446	9	0
Desulfosarcina ovata	23	164	33	63	1	172	2	43	9	114	3	8	93	21	19	0	5	473	206	258	67	168	5	1	42	77	78	97	541	4	527	254	278	115	82	51	200	282	3	2	6	199	52	3	212	249	1055	13	5
Bordetella flabilis	23	51	11	17	0	46	1	8	0	34	3	5	27	5	8	0	11	133	60	140	17	40	8	0	6	11	14	19	147	4	152	53	77	24	14	18	24	60	3	2	0	32	19	1	68	74	398	5	2
Bacteriovorax sp. Seq25_V	23	233	42	101	0	162	3	93	14	170	1	20	130	24	29	0	7	487	183	509	113	322	6	2	72	133	136	700	963	3	411	153	193	188	114	65	596	366	4	11	13	364	124	3	255	212	1009	12	7
Hyphomonas sp. L-53-1-40	23	32	8	10	0	42	3	6	1	23	3941	1	31	5	5	124	716	178	75	26	18	56	536	53	21	24	31	153	244	240	477	234	93	89	84	66	112	119	2942	4	7	245	168	1954	1043	1055	28274	5	0
Providencia stuartii	23	46	10	19	0	47	2	24	3	35	3	6	19	4	6	1	3	201	110	149	21	46	6	1	40	37	35	92	211	1	229	128	77	51	46	32	92	131	4	2	9	53	27	1	274	235	1869	17	2
Campylobacter pinnipediorum	23	56	6	22	0	34	1	29	0	63	2	12	28	5	7	2	1	102	54	143	42	101	2	0	21	31	40	90	267	2	160	69	57	57	37	27	179	120	2	0	6	98	26	1	47	30	134	4	2
Ostreococcus lucimarinus virus OlV4	23	278	48	101	0	2	0	58	10	109	2	44	50	7	17	2	8	14	5	1528	147	377	5	1	1	4	7	1	14	0	18	2	6	5	4	5	18	10	0	0	0	6	1	0	4	5	17	0	0
Bacteroidia bacterium	23	571	96	236	1	411	10	329	63	641	2	21	336	68	82	2	4	1412	626	384	310	852	7	1	303	328	417	495	3353	1	1913	809	1088	621	382	288	1072	1970	7	10	13	506	203	3	767	676	3161	64	22
Actinomycetales bacterium mxb001	23	42	12	12	2	45	1	10	3	26	3	3	41	7	15	0	7	161	63	163	11	37	4	0	15	13	21	22	152	3	245	107	118	35	21	15	35	69	1	1	3	49	14	0	65	70	354	2	2
uncultured bacterium EIL80E09	23	2911	558	1135	0	19	0	2224	437	4641	0	26	1239	264	314	1	1	56	17	158	1433	4093	2	0	513	609	754	1895	6589	0	31	9	18	1292	885	547	1873	3981	0	13	26	1047	272	0	13	11	45	277	92
Fusobacterium necrophorum	23	48	8	19	0	47	1	27	4	46	0	14	24	4	6	3	3	117	53	201	27	76	6	0	17	19	29	38	162	2	178	81	64	48	30	20	72	79	0	0	3	52	15	3	63	39	263	4	1
Caldanaerobacter subterraneus	23	62	20	29	0	70	5	35	4	73	3	9	33	4	6	0	4	282	128	215	32	110	7	0	23	30	38	53	252	5	328	138	169	61	29	21	110	122	2	4	3	121	36	4	95	88	482	7	1
Magnetospirillum sp. 64-120	23	193	43	71	0	122	2	84	14	166	6	13	93	25	21	0	8	401	171	420	83	237	6	1	56	98	110	140	841	4	592	235	239	185	120	80	205	364	3	7	6	194	55	5	210	161	932	15	6
uncultured aquatic phage	23	52	1	19	2	37	1	8	0	17	3	17	5	0	0	0	1	88	44	435	9	30	9	0	11	12	10	15	25	1	189	72	90	25	13	8	20	22	1	0	0	46	2	1	91	69	316	2	0
uncultured Rubrobacteraceae bacterium	23	238	81	130	0	384	9	61	20	182	3	5	141	35	38	1	4	1274	540	172	100	244	13	0	89	93	91	137	837	0	1530	723	758	145	110	96	195	362	1	12	16	286	123	2	572	519	2745	50	11
Soehngenia saccharolytica	23	236	68	89	0	34	1	63	10	122	0	10	90	22	20	0	0	128	47	305	85	211	0	0	107	133	154	45	521	0	137	55	48	210	121	119	75	353	0	7	11	55	19	0	50	43	204	20	6
Paraburkholderia sp.	23	54	14	24	1	60	3	10	1	50	1	5	23	8	3	1	2	176	88	134	26	58	3	1	14	22	18	45	158	0	236	108	120	30	20	18	82	71	0	5	1	70	11	4	61	63	303	8	5
Flammeovirga aprica	23	185	30	75	0	61	0	68	9	114	0	8	59	12	18	0	0	251	103	120	53	178	3	1	87	100	113	92	622	1	300	138	205	153	94	76	160	309	1	7	14	105	40	0	77	63	384	28	9
Alteromonas sp. 07-89-2	23	158	41	63	0	274	9	5	1	15	1	3	34	9	12	0	2	636	296	103	5	21	0	0	220	278	345	277	732	0	972	438	30	189	136	71	127	919	0	7	10	123	271	0	373	309	20154	8	2
candidate division TM6 bacterium GW2011_GWE2_42_60	23	39	11	14	2	16	2	19	1	36	3	6	13	7	2	1	2	47	30	210	16	35	4	1	7	19	14	43	116	1	68	43	38	16	21	11	35	48	0	1	2	28	9	0	12	25	90	6	1
Parendozoicomonas haliclonae	23	197	26	82	0	118	2	56	11	130	8	9	103	20	21	1	3	378	168	259	65	200	8	0	47	45	69	114	438	3	455	207	233	86	64	35	152	223	2	4	7	152	34	1	175	154	768	14	5
Inquilinus limosus	23	408	79	179	1	296	4	144	26	344	13	18	206	53	45	2	3	885	451	333	160	418	14	1	167	187	200	275	1624	5	1146	478	495	397	237	153	479	732	11	14	14	376	139	9	464	437	2371	32	9
Candidatus Methanofastidiosum methylthiophilus	23	67	13	20	2	120	1	42	5	71	2	4	35	7	8	0	4	318	139	215	38	126	11	2	31	38	41	78	374	2	389	162	174	84	62	32	157	195	1	3	5	147	49	1	145	138	547	13	4
Thiomicrorhabdus sp. Kp2	23	69	16	21	1	35	3	26	5	56	0	15	38	9	7	0	1	158	88	234	21	72	2	0	16	24	33	65	204	0	287	110	142	44	28	21	86	76	0	3	2	70	15	0	85	52	305	6	2
Rubinisphaera italica	23	437	76	156	0	455	9	121	14	201	3	11	249	50	54	0	8	1520	712	228	129	371	11	0	76	125	141	102	1182	0	2478	1057	1582	208	130	104	137	769	1	29	34	156	280	0	712	666	3579	7	3
Candidatus Kentron sp. LPFa	23	116	23	54	2	55	3	47	4	83	1	12	68	13	20	0	1	179	86	153	48	111	1	0	42	54	55	120	409	0	231	91	104	119	70	50	136	190	1	3	4	69	17	2	96	74	373	7	1
Leptospira perolatii	23	95	19	43	0	76	2	26	6	101	0	3	58	14	10	0	1	281	112	72	41	138	3	0	28	55	54	122	439	2	360	120	169	107	55	36	227	214	0	2	1	142	37	0	94	100	421	13	1
Colwellia marinimaniae	23	11	2	7	1	0	0	4	2	6	7	3	0	0	0	1	0	1	1	183	2	8	0	0	0	0	1	0	4	0	2	0	0	3	1	1	1	2	0	1	0	13	2	0	2	1	5	0	0
Candidatus Brocadia sp. WS118	23	71	7	12	0	72	4	40	6	50	2	13	41	7	13	0	9	267	115	289	20	100	5	1	21	25	29	45	234	3	296	132	169	65	35	24	116	135	3	0	3	88	24	2	124	116	556	9	2
Nitrospira sp.	23	258	61	99	0	520	19	99	13	184	4	10	132	33	41	2	3	1874	839	265	83	271	8	0	116	123	150	215	1004	0	1972	796	994	242	148	98	346	532	3	5	12	326	119	3	727	672	3366	22	12
Polaribacter virus P12002L	23	5	1	1	1	0	0	2	0	4	3	11	2	0	0	0	3	1	2	273	5	10	1	0	7	8	4	1	13	6	4	2	3	10	7	0	14	14	0	0	0	9	0	0	2	3	15	0	1
Croceicoccus marinus	23	59	18	36	0	5929	195	26	2	39	10	85	2062	501	510	30	153	39413	20858	39	31	83	60	5	35	39	44	148	1745	0	535	253	1310	60	42	35	82	747	26	6	8	127	98	54	329	341	9064	8	0
Enterococcus termitis	22	8	4	6	0	9	0	5	0	5	1	0	3	1	2	1	0	41	16	40	4	15	2	0	9	5	11	9	74	0	45	26	22	8	9	6	28	22	0	1	1	17	4	0	7	10	74	0	0
Cronobacter phage vB_CsaP_Ss1	22	0	0	1	0	0	0	1	0	0	1	5	0	0	0	0	6	10	15	133	1	3	6	1	0	0	2	0	5	3	0	0	0	3	0	0	0	4	1	0	1	1	0	0	1	1	2	0	0
Reichenbachiella sp. 5M10	22	118	30	58	1	60	1	69	18	168	3	7	97	18	20	0	3	203	94	231	87	226	5	1	66	72	86	146	703	1	413	138	186	112	76	55	346	413	4	4	8	217	49	2	132	128	576	13	4
Candidatus Methylopumilus universalis	22	164	20	60	1	190	7	101	21	227	4	7	124	23	23	1	3	584	227	184	106	300	4	0	150	173	200	375	1209	2	755	288	325	377	248	142	700	572	4	3	9	221	74	0	216	201	831	26	3
alpha proteobacterium BAL199	22	899	158	313	1	569	17	247	36	548	19	19	371	72	81	0	7	1716	814	448	238	666	11	2	265	339	408	231	3149	3	2401	1051	1144	657	428	324	495	1504	5	19	25	402	246	12	883	847	4244	69	17
Nocardia cyriacigeorgica	22	186	41	76	0	60	2	32	2	88	2	5	58	15	12	1	2	249	156	180	47	105	6	0	47	87	104	28	385	0	379	162	164	157	110	101	29	173	4	6	8	66	12	2	116	109	599	26	4
Magnetospirillum aberrantis	22	230	41	92	0	127	4	63	7	137	4	2	92	22	28	0	1	401	203	164	67	186	4	1	69	91	120	108	855	2	520	246	264	172	115	95	190	375	2	5	3	171	88	3	211	197	934	19	6
Xenococcus sp. PCC 7305	22	144	20	56	1	76	2	44	7	98	8	18	77	15	14	1	5	275	113	228	45	144	4	0	94	120	128	103	526	3	250	106	134	320	205	133	154	422	0	5	9	95	53	6	133	105	540	18	3
Nostoc linckia	22	107	21	31	1	79	6	42	6	76	2	10	33	7	9	1	9	229	95	240	25	88	7	1	30	43	57	52	338	2	237	120	142	87	57	39	90	183	2	4	1	82	60	1	77	85	2885	16	3
Candidatus Vogelbacteria bacterium RIFOXYD1_FULL_44_32	22	6	0	4	1	7	1	4	0	13	2	10	4	2	0	0	1	26	14	240	4	13	3	2	5	4	6	13	57	1	37	6	10	7	5	4	16	17	0	0	0	17	2	0	13	5	54	1	1
Nitrospiraceae bacterium	22	453	91	198	1	670	25	196	28	419	7	16	252	52	64	0	4	2267	936	350	205	611	5	0	154	194	232	456	1747	2	2674	1094	1314	342	213	154	793	911	2	14	14	586	198	2	976	912	4390	52	17
Gammaproteobacteria bacterium TMED119	22	96	18	36	0	31	0	41	9	84	0	8	63	11	12	0	0	122	50	240	56	107	1	1	45	38	51	287	346	0	174	81	68	99	60	46	260	131	2	1	3	227	23	0	41	47	168	10	4
Krakvirus S39C11	22	67	12	23	1	0	0	9	1	24	3	16	14	2	7	0	6	2	1	380	11	37	9	1	104	134	145	23	255	3	2	2	0	194	132	119	14	145	1	0	0	1	0	0	1	0	1	0	0
Prochlorococcus T7-like virus P-TIP44	22	0	0	0	0	0	0	0	0	0	2	3	0	0	0	0	3	1	0	79	1	0	4	1	0	0	0	0	0	0	0	0	0	0	0	0	0	0	0	0	0	1	0	0	0	0	0	0	0
Alphaproteobacteria bacterium MarineAlpha6_Bin1	22	374	74	162	0	3734	110	284	56	559	3	6	315	60	85	0	2	10780	4385	195	329	918	3	0	321	353	432	671	3066	1	7760	3276	2512	759	518	356	1974	1110	3	10	9	1295	214	9	5211	4197	21386	31	8
Denitrovibrio sp.	22	161	33	55	1	115	3	64	13	150	2	13	93	24	21	0	5	342	157	352	66	221	4	0	38	59	68	138	486	5	490	234	253	99	72	56	243	281	2	4	8	196	52	1	170	145	676	15	7
Phascolarctobacterium sp.	22	27	3	11	1	26	0	6	1	26	6	1	12	4	4	1	4	74	42	167	14	51	7	0	9	6	5	15	82	1	100	28	38	19	9	9	33	33	2	0	0	35	8	2	34	25	166	2	1
Desulfobacteraceae bacterium IS3	22	330	68	135	1	425	13	107	21	237	2	17	164	32	34	0	4	1326	571	265	129	354	6	0	102	115	160	209	1110	1	1814	707	884	270	157	115	385	556	4	3	9	308	90	2	636	554	2739	29	9
Clostridium tetani	22	85	15	40	2	41	1	35	5	78	1	9	37	8	9	0	2	99	43	172	41	96	4	0	20	26	33	61	171	2	141	55	64	51	34	14	107	90	3	2	3	92	12	1	44	34	160	3	0
Cyanophage S-RIM156	22	22	0	3	0	0	0	9	2	13	6	17	2	0	3	0	5	3	2	512	6	23	4	0	12	17	26	19	30	2	0	0	0	39	16	19	25	33	4	0	0	19	1	1	0	0	1	2	0
Aliikangiella sp. M105	22	360	56	153	0	195	7	127	24	277	1	9	219	43	64	0	1	738	297	209	139	447	8	0	102	113	139	340	1140	1	982	379	488	248	151	100	440	549	2	7	8	298	83	7	304	260	1349	27	14
Parcubacteria group bacterium GW2011_GWB1_56_8	22	10	1	5	1	10	0	4	1	9	0	15	3	2	4	1	3	20	8	407	5	9	5	0	2	7	7	5	24	2	27	9	11	7	13	3	12	22	0	0	0	14	2	1	35	23	88	1	2
Candidatus Filomicrobium marinum	22	41	7	22	0	25	2	25	7	51	4	8	42	3	7	0	2	86	43	240	24	84	4	0	12	20	27	92	140	1	119	46	47	29	27	12	79	58	2	1	1	145	12	2	38	32	239	17	1
Homavirus sp.	22	85	17	43	1	29	0	53	6	109	2	15	31	5	13	0	1	120	37	434	66	168	4	0	22	39	52	33	209	3	147	66	65	98	56	37	141	138	1	5	5	138	21	2	57	55	199	19	5
ANME-2 cluster archaeon	22	165	33	54	1	236	10	58	6	130	3	10	76	19	35	0	5	670	301	364	74	187	5	0	55	62	97	128	574	1	775	334	415	126	93	57	252	301	3	6	6	201	55	1	407	343	1535	22	8
Achromobacter denitrificans	22	47	10	23	0	35	1	12	2	33	0	10	20	7	7	0	3	102	73	130	23	38	2	1	9	21	25	24	126	1	193	89	100	34	22	15	35	57	2	1	2	30	15	2	86	42	328	10	1
Synechococcus sp. UW86	22	3060	920	1282	0	38	2	673	84	1989	0	32	2902	614	694	2	0	103	73	412	941	2341	2	0	146	191	232	27	1242	0	22	8	7	433	260	203	20	1039	0	9	9	55	68	0	11	13	44	31	12
Cellulophaga virus ST	22	10	0	3	0	2	0	7	2	17	1	25	3	0	0	1	6	10	6	705	6	22	11	0	9	14	19	10	62	1	16	7	5	22	19	14	10	33	2	0	0	6	3	2	7	1	16	0	0
archaeon GW2011_AR15	22	44	8	20	2	57	2	24	2	56	3	9	27	4	5	0	5	127	74	342	25	73	4	1	21	16	24	47	177	5	121	50	50	41	38	23	120	90	1	1	0	56	19	1	74	49	235	4	0
Hydrogenovibrio sp. MA2-6	22	2	0	0	0	4	0	1	0	2	4	6	1	0	0	1	11	13	5	193	3	4	11	1	1	4	6	6	20	3	22	9	12	7	4	2	3	11	1	0	1	9	1	4	7	6	27	0	5
Celeribacter phage P12053L	22	3	0	0	1	0	0	2	0	2	5	8	0	0	0	0	18	4	0	283	2	1	8	1	0	0	4	0	5	3	4	1	1	3	4	2	0	2	4	0	0	2	0	3	1	1	5	0	0
Marinoscillum furvescens	22	253	39	99	2	194	3	122	24	250	2	14	153	35	49	0	5	642	297	303	124	347	12	0	103	108	129	265	1342	3	2376	970	418	318	196	122	769	759	11	19	37	2507	215	9	1623	1336	4923	56	8
Nitrosomonas aestuarii	22	83	15	31	1	115	2	26	5	72	3	11	32	11	15	1	12	345	150	172	27	78	20	0	27	37	56	122	329	0	517	201	225	80	38	34	174	156	1	1	4	83	29	1	164	169	787	4	4
Bradyrhizobium yuanmingense	22	54	11	25	0	39	2	16	0	33	2	7	29	3	6	2	7	135	62	160	18	50	6	0	19	21	22	29	164	1	198	84	82	36	25	15	41	81	2	3	1	25	14	1	60	65	397	5	2
Candidatus Heimdallarchaeota archaeon LC_2	22	156	22	63	0	104	5	102	20	214	0	32	180	31	49	0	0	355	123	905	275	802	0	0	31	39	44	113	333	2	348	154	180	62	39	46	160	172	0	4	4	154	37	0	142	113	552	7	3
Caulobacter virus Sansa	22	0	0	0	0	1	0	0	0	1	0	4	0	0	0	0	0	0	0	62	0	0	1	1	3	2	1	0	2	0	0	0	0	3	0	0	1	0	0	0	0	0	0	0	0	0	2	0	0
Bacteroidetes bacterium 43-16	22	41	13	20	0	22	2	30	5	47	2	4	31	9	11	1	5	88	36	158	39	83	1	1	12	20	23	18	188	1	113	40	47	47	29	11	47	128	0	3	0	15	12	0	37	31	164	6	1
Thalassobaculum fulvum	22	897	178	357	0	487	17	236	30	507	14	5	350	59	79	0	4	1725	732	166	258	665	8	0	232	327	364	261	2898	4	2383	1020	1051	607	412	285	499	1391	11	12	26	412	237	12	832	810	3910	83	17
Bordetella bronchiseptica	22	48	6	16	2	38	1	18	0	33	5	4	24	10	3	0	5	124	55	130	15	49	9	3	21	20	20	33	124	2	126	85	55	25	18	16	35	59	4	1	4	37	12	0	72	55	418	5	2
Aeromonas phage Asfd_1	22	21	2	8	1	1	0	10	2	14	1	11	2	0	0	0	2	5	1	294	7	21	4	0	1	2	4	2	7	0	10	1	3	4	6	2	3	2	0	0	0	18	2	1	2	7	11	3	0
uncultured marine gamma proteobacterium EBAC20E09	22	5417	950	2113	0	59	4	4191	727	8544	0	44	4012	760	918	1	0	182	74	373	3670	10503	1	0	713	805	1051	2475	7643	0	106	54	51	1701	1051	704	3167	3648	0	28	36	1627	284	0	44	22	140	252	83
Microscilla marina	22	310	44	119	0	129	3	123	15	260	5	12	151	40	41	0	2	492	225	312	133	347	9	1	105	145	185	271	1306	0	659	261	320	275	165	134	502	735	6	11	7	293	74	0	228	201	1028	25	7
Pelagicoccus sp. NFK12	22	399	62	137	0	163	3	90	15	217	5	12	171	44	37	0	0	496	248	236	103	297	4	0	57	73	71	93	716	0	834	310	457	132	77	64	148	401	25	27	27	154	228	2	275	242	1289	13	2
Cyanothece sp. BG0011	22	72	10	24	2	31	0	27	4	58	1	10	26	3	7	0	3	105	52	221	24	64	1	0	26	28	34	33	235	2	120	58	84	76	41	39	83	128	1	2	0	49	28	0	52	55	228	7	2
candidate division Zixibacteria bacterium HGW-Zixibacteria-1	22	73	12	40	0	131	2	39	11	60	4	6	68	11	12	0	4	456	215	223	58	114	7	0	22	26	36	101	336	5	561	223	345	45	31	15	144	206	1	3	3	131	50	4	228	154	1021	4	1
Rhodobiaceae bacterium	22	1916	332	715	0	562	18	831	172	1799	85	13	995	214	254	2	24	1913	887	194	916	2398	76	12	691	765	999	1900	6643	35	2841	1127	1225	1683	998	692	2271	2853	24	21	33	1871	413	157	915	802	4009	101	27
Clostridium formicaceticum	22	24	8	10	0	37	1	19	6	34	4	8	25	3	4	1	5	125	58	208	27	65	4	0	9	15	18	22	134	2	190	87	66	34	13	7	63	71	1	2	1	68	21	1	58	47	220	2	0
Bacteroidetes bacterium SW_11_45_7	22	101	18	49	1	99	3	78	10	154	3	9	54	9	25	0	5	387	159	294	71	188	9	2	59	55	87	67	604	0	488	196	263	110	74	50	130	371	1	3	6	105	50	0	181	143	721	23	3
Thermoplasmatales archaeon SG8-52-4	22	98	17	46	0	80	3	34	5	80	0	14	44	9	16	0	0	287	129	290	62	156	2	0	151	190	270	110	618	0	333	116	176	657	431	289	168	520	1	1	0	75	24	2	82	77	460	26	7
Chlamydiae bacterium CG10_big_fil_rev_8_21_14_0_10_35_9	22	93	23	31	2	77	1	47	13	100	2	7	71	20	11	1	3	225	104	317	44	169	7	1	47	52	64	75	399	3	275	103	116	108	64	51	167	200	3	3	3	165	27	1	95	84	420	5	1
Calothrix sp. NIES-2100	22	54	6	16	0	35	1	20	5	39	2	8	11	2	6	0	1	144	66	171	12	58	4	0	32	31	30	21	149	6	182	77	70	58	23	26	52	76	2	3	4	46	19	0	79	63	356	5	4
Rhodopirellula sp. JC645	22	371	77	108	0	314	11	49	8	143	0	4	218	40	60	0	0	969	483	95	108	270	4	0	47	83	88	66	1022	0	1500	686	943	159	104	81	118	575	0	11	15	74	191	1	485	473	2652	15	4
Salibacter halophilus	22	292	56	124	1	158	4	187	34	379	4	15	204	39	46	0	2	505	205	323	212	569	12	2	197	228	263	181	1772	0	673	254	391	381	242	158	364	1283	3	6	10	205	141	1	391	344	3002	66	18
Flagellimonas sp. XY-359	22	120	21	36	1	51	1	69	15	150	2	7	79	20	25	0	3	188	90	210	55	164	9	0	38	62	72	116	622	3	215	113	135	113	87	63	213	372	1	2	6	101	47	2	112	103	1167	14	3
Marinobacterium litorale	22	340	87	132	1	68	2	32	4	74	8	1	46	10	19	0	1	282	134	113	40	95	10	4	27	29	38	68	310	1	464	222	185	43	33	35	94	143	6	2	7	79	22	1	163	155	826	32	15
Flavobacterium sp. MAH-1	22	58	12	20	1	26	0	34	9	74	5	3	45	11	8	0	7	86	43	197	36	84	5	0	26	37	50	64	320	3	107	45	70	66	39	30	93	179	3	1	4	67	22	2	42	42	614	7	2
Leptospira idonii	22	99	11	47	0	59	2	74	14	140	0	1	56	16	19	0	0	221	96	83	55	159	4	0	38	52	60	88	417	0	239	128	123	87	67	41	181	181	1	1	3	125	33	0	73	93	304	8	0
Flammeovirga sp. SR4	22	163	32	62	0	67	0	80	17	189	1	15	100	19	17	0	5	229	89	468	113	321	7	0	66	83	111	132	751	1	318	129	169	156	112	72	309	549	1	5	3	155	37	1	100	96	478	18	8
crAssphage cr118_1	22	1	1	0	0	1	0	0	0	3	3	9	0	0	0	1	4	0	1	173	0	1	3	1	1	0	0	0	1	2	3	1	3	1	0	0	1	2	1	0	0	4	0	0	1	3	11	0	0
uncultured phage MedDCM-OCT-S11-C561	22	16	2	2	0	2	0	3	0	3	3	15	0	0	0	0	2	4	1	281	2	13	6	0	1	3	2	3	2	1	1	1	2	4	2	5	0	2	1	0	0	0	0	1	2	0	2	0	0
Dendrosporobacter quercicolus	22	44	8	10	0	29	2	8	4	26	1	6	23	1	4	0	7	109	48	137	19	22	6	0	6	16	15	20	89	0	130	54	51	25	12	4	36	52	0	2	2	35	10	0	59	49	251	4	4
Planctomycetes bacterium HG15A2	22	303	63	136	0	439	13	60	10	129	0	8	145	25	38	1	3	1279	642	182	76	227	4	0	56	58	84	88	798	1	1854	773	1314	132	95	52	109	487	0	28	46	137	493	2	667	667	3536	10	3
Methylobacter sp.	22	188	30	58	0	130	0	60	16	144	3	8	76	13	21	1	2	481	196	145	59	171	9	0	64	88	85	181	604	0	664	303	287	136	102	77	245	320	0	6	4	164	54	3	176	187	989	13	5
Pedobacter insulae	22	37	16	14	0	23	1	21	2	30	2	7	17	9	5	0	1	101	36	287	24	49	6	0	9	17	24	25	160	0	140	60	62	33	26	22	73	90	1	0	2	24	5	0	40	33	216	3	1
Leptolyngbya sp. IPPAS B-1204	22	108	31	39	0	57	0	45	5	79	1	4	44	6	15	1	3	188	84	129	48	94	1	0	74	83	108	66	406	1	240	116	122	187	122	87	82	265	0	2	8	111	50	0	110	97	594	20	5
Vibrio coralliilyticus	22	121	32	48	2	55	1	55	9	95	1	9	54	5	14	1	4	187	77	166	35	159	5	0	53	70	82	69	433	0	198	89	111	145	82	56	146	268	1	1	5	64	29	0	976	854	349	6	3
Synechococcus sp. CB0101	22	193	41	71	0	13	1	66	11	181	6	26	121	18	28	1	2	56	24	471	43	82	5	1	93	141	141	36	740	5	53	28	33	224	127	135	62	587	2	22	20	84	318	2	19	20	114	17	3
Tenacibaculum sp. MAR_2009_124	22	220	32	83	2	54	4	146	25	277	2	11	153	33	37	0	5	244	98	310	124	389	9	0	74	83	106	131	845	4	454	182	244	156	125	80	310	541	1	3	2	173	47	2	125	110	729	20	10
Tistlia consotensis	22	636	103	252	2	515	15	214	38	450	23	11	318	52	66	3	7	1815	763	218	241	653	13	1	208	280	289	274	2385	2	2312	979	983	581	344	271	651	1086	18	20	19	402	201	11	896	784	4269	63	14
Snodgrassella alvi	22	136	24	63	1	48	4	45	7	88	4	4	48	10	12	2	2	133	43	218	45	127	2	1	36	52	62	135	413	0	221	89	85	105	78	41	199	176	1	3	4	107	28	1	66	53	273	13	4
Mycoplasma bovis	22	31	6	14	0	6	0	10	2	19	0	0	9	3	6	0	0	18	8	94	9	25	8	0	10	14	9	4	41	0	24	9	8	18	18	10	29	27	0	1	0	7	6	0	5	7	28	2	0
Sphingomonas sp. YZ-8	22	59	7	23	1	32	0	35	4	47	5	5	35	8	14	1	2	91	49	140	21	86	10	0	30	31	45	62	254	3	146	66	58	65	36	20	95	113	2	0	0	68	18	2	43	50	316	7	4
Puniceicoccaceae bacterium 5H	22	222	42	79	0	150	5	52	9	103	0	8	140	32	35	0	1	515	245	237	101	245	10	0	32	60	59	62	493	10	668	286	408	100	51	43	95	275	3	6	13	104	81	0	262	234	1369	5	3
Ktedonobacterales bacterium ID150040	21	138	17	46	0	121	2	33	8	95	1	13	50	14	15	0	6	391	228	190	38	117	6	0	29	42	58	71	380	2	574	205	257	63	41	36	135	171	0	2	7	162	55	5	265	244	1069	11	5
Mycobacterium avium	21	53	22	17	0	57	6	13	4	29	0	5	36	6	7	0	6	224	105	130	17	54	5	1	28	26	38	19	173	1	353	155	154	38	22	29	31	84	2	6	4	19	15	3	114	89	495	26	4
Mameliella alba	21	64	3	27	1	57	3	29	2	51	24	5	39	9	5	0	12	184	87	171	14	47	31	6	22	26	35	29	232	1	143	53	45	61	44	30	44	127	18	1	2	51	25	8	101	81	1861	8	2
Nitrosomonas nitrosa	21	81	11	28	0	65	2	26	1	71	4	16	44	11	5	0	5	231	84	317	25	82	10	1	55	54	59	93	232	3	244	128	107	88	50	44	141	158	5	4	3	85	26	4	94	94	438	6	2
Chlamydiae bacterium	21	99	12	35	1	110	2	41	5	74	1	12	55	7	17	0	7	286	156	272	31	108	5	0	53	42	56	85	376	3	405	170	219	90	63	32	195	195	2	4	6	116	46	3	148	123	639	8	3
Candidatus Aureabacteria bacterium SURF_26	21	117	21	43	0	138	2	65	9	108	1	3	71	9	9	0	1	382	161	104	41	130	4	1	38	34	49	122	434	0	558	241	249	87	34	45	221	226	0	5	4	233	47	1	193	148	844	11	1
Parcubacteria group bacterium ADurb.Bin016	21	12	1	0	1	4	1	4	1	10	1	6	4	0	1	0	3	21	9	147	1	15	8	0	1	2	3	6	22	1	16	10	10	5	5	2	22	26	1	0	0	15	1	1	12	8	36	1	0
Achromobacter insolitus	21	24	5	7	0	14	1	16	1	12	1	12	15	1	0	1	1	40	23	99	4	21	2	0	4	6	14	8	67	1	48	38	26	22	10	3	13	38	0	0	1	10	10	1	32	17	152	2	2
Neorhizobium galegae	21	78	20	36	0	64	2	33	10	66	4	8	32	7	6	2	3	292	123	189	30	75	12	2	15	29	44	44	295	4	255	106	142	64	54	39	93	146	2	4	6	68	28	6	104	104	996	12	2
Agrobacterium vitis	21	198	47	84	0	132	7	74	16	169	6	9	124	24	28	1	4	464	200	176	93	255	4	0	96	97	116	105	753	1	615	228	249	200	117	93	190	398	6	6	10	168	65	20	303	256	2890	42	10
Lacipirellula parvula	21	147	36	61	1	200	5	33	4	56	1	9	90	17	15	0	2	583	266	127	41	102	2	1	32	48	39	33	376	2	731	328	531	62	40	33	53	238	2	19	22	71	176	2	293	315	1659	6	0
Magnetospirillum sp. XM-1	21	281	48	134	0	161	3	82	13	168	6	13	128	21	17	1	1	440	203	188	74	212	6	1	70	103	110	209	769	2	594	246	224	157	115	94	270	326	1	4	6	211	41	3	200	197	1043	13	7
Phaeodactylibacter xiamenensis	21	247	52	103	1	183	8	122	17	250	5	17	153	28	39	1	3	617	308	258	133	394	11	1	117	125	146	185	1035	0	869	354	440	216	145	99	391	695	6	9	8	216	66	3	464	419	1730	15	5
Candidatus Roizmanbacteria bacterium CG_4_10_14_0_2_um_filter_39_13	21	18	3	10	1	21	1	7	0	16	1	13	9	0	5	0	2	54	27	212	8	23	1	1	4	5	5	13	52	3	76	28	44	13	9	4	37	30	0	1	2	24	4	4	29	30	142	2	2
bacterium SCN 62-11	21	90	25	32	1	94	2	21	4	50	0	6	40	9	9	0	0	321	149	77	28	60	2	0	19	34	36	41	238	1	304	104	156	47	49	33	96	115	0	1	7	39	39	1	127	124	2909	10	1
Henriciella sp.	21	78	20	35	1	1526	39	17	7	60	5	44	1103	231	265	18	75	7416	3757	64	35	102	40	1	26	25	39	136	1890	3	1204	579	1812	50	48	31	105	857	7	23	28	304	558	96	2692	2610	106834	6	4
SAR202 cluster bacterium Io17-Chloro-G9	21	940	150	382	0	7607	192	211	33	361	0	2	286	62	64	0	1	20252	9659	90	239	589	0	0	144	177	196	576	2287	0	16864	7441	10477	249	161	110	691	994	0	58	89	3489	1724	1	16929	15730	74687	10	2
Polyangium sp. SDU3-1	21	295	67	125	0	217	7	56	10	158	0	15	125	34	31	0	3	751	328	258	82	197	3	0	34	57	75	81	432	1	896	394	491	85	58	40	63	287	3	14	14	101	60	1	295	295	1613	21	7
Candidatus Lindowbacteria bacterium RIFCSPLOWO2_12_FULL_62_27	21	31	5	9	1	120	1	14	1	34	1	8	21	9	4	1	2	446	191	206	18	42	2	0	20	18	24	51	144	1	490	206	155	35	35	22	92	48	0	1	5	69	8	2	175	158	628	2	4
Synechococcus sp. GFB01	21	97	16	33	0	12	0	41	4	94	0	7	69	14	20	0	3	37	22	314	21	39	4	1	59	85	97	21	468	0	67	14	26	138	91	83	32	363	0	11	17	48	165	1	19	22	105	10	2
Mammaliicoccus sciuri	21	26	5	11	1	43	1	20	2	40	2	6	18	1	2	1	4	111	42	161	25	45	4	0	23	21	33	20	105	3	123	54	62	46	36	15	45	44	0	2	5	34	14	1	42	37	155	16	5
Ruminococcaceae bacterium	21	105	37	43	1	72	3	47	7	78	1	6	73	12	12	1	4	249	90	165	64	154	2	0	30	38	42	78	365	1	297	139	142	88	50	34	136	197	1	2	3	156	39	1	107	90	522	20	4
Candidatus Kapabacteria bacterium	21	116	25	51	1	151	3	60	10	120	1	8	64	13	15	0	4	447	191	203	58	157	4	0	48	54	61	84	470	3	586	235	306	96	66	39	189	275	2	4	10	151	53	1	187	154	818	9	3
Parcubacteria bacterium C7867-008	21	2	1	1	0	3	0	1	0	7	2	7	3	0	1	0	4	18	3	136	4	12	5	0	1	4	4	4	26	2	9	2	5	9	2	2	9	18	0	1	1	11	0	0	8	4	19	0	0
Candidatus Thioglobus sp. NP1	21	1276	218	533	0	27777	795	720	135	1543	0	16	1805	331	399	0	2	106511	45481	337	944	2491	5	1	1344	1729	2167	2050	17469	0	291471	115722	103064	3510	2230	1507	6881	8589	1	17	25	1585	260	1	33959	28267	125263	120	42
bacterium ADurb.Bin363	21	113	24	57	2	134	3	61	12	97	3	10	57	15	14	0	4	453	174	203	58	153	4	1	55	57	66	97	462	0	597	235	270	122	84	58	192	255	2	2	2	168	55	1	231	163	1120	7	4
Streptomyces albulus	21	58	19	16	0	45	1	10	1	33	1	3	28	5	6	1	4	170	76	131	26	38	4	0	27	27	25	18	141	1	193	87	110	39	32	31	17	63	0	5	3	54	8	2	82	59	432	21	1
Candidatus Sulfopaludibacter sp. SbA3	21	175	37	70	2	216	3	62	13	112	2	6	85	22	26	2	6	622	280	161	52	174	3	0	63	68	90	115	632	3	741	289	363	150	74	62	206	285	3	7	6	179	67	5	340	303	1426	10	3
Marinomonas arctica	21	27	1	10	1	10	1	9	4	36	2	13	21	3	5	1	3	43	18	267	16	31	8	1	12	13	18	23	117	2	69	29	24	43	20	9	35	45	1	3	2	46	5	1	39	27	216	8	1
Prosthecobacter vanneervenii	21	234	49	84	0	159	12	61	10	115	2	9	113	18	37	0	1	504	232	278	80	164	5	0	61	55	75	63	666	6	862	377	458	137	89	54	84	354	1	6	12	87	86	5	261	262	1425	2	2
Anabaena subtropica	21	12	2	8	0	13	0	3	2	9	2	8	13	1	1	1	1	42	22	122	3	14	6	2	8	23	10	6	71	1	66	28	19	38	7	11	14	43	1	1	4	27	6	1	30	20	93	7	1
Brevibacillus laterosporus	21	73	5	29	3	29	1	29	8	61	3	6	31	5	7	1	2	113	55	218	29	93	1	1	18	26	33	109	188	1	127	54	48	53	40	19	103	93	2	2	4	125	10	4	59	38	242	9	3
Pseudomonas mendocina	21	64	16	21	0	34	1	28	6	58	7	8	38	7	7	4	23	137	51	143	25	81	139	6	34	30	40	89	402	2	281	92	391	68	45	37	79	182	1	3	5	104	51	1	394	365	3954	8	1
Comamonas kerstersii	21	29	6	20	2	9	0	17	4	33	4	10	10	2	4	0	3	39	21	214	10	42	6	1	10	19	22	24	80	1	47	26	20	27	11	13	46	37	3	1	2	48	5	1	27	13	128	5	1
Bacillus marisflavi	21	44	2	15	0	27	0	33	3	45	1	1	19	2	5	0	2	104	63	55	18	43	2	0	13	19	30	36	162	1	113	47	53	25	17	18	82	76	1	0	0	63	3	0	39	45	173	4	1
Roseburia intestinalis	21	44	1	14	0	26	0	18	6	34	0	9	15	2	5	1	2	59	24	116	14	52	2	1	3	11	8	11	54	0	104	46	54	10	5	8	28	25	0	0	2	9	3	0	35	41	151	4	1
Azospirillum oleiclasticum	21	315	85	138	0	287	10	121	15	218	17	5	135	45	35	0	1	927	416	235	107	300	13	4	99	130	162	134	1153	0	1198	540	566	255	178	118	284	563	12	14	16	248	101	10	476	429	2209	33	11
Bacteroides thetaiotaomicron	21	46	13	15	0	27	2	21	7	60	0	16	33	6	4	0	1	114	52	326	34	79	4	0	11	20	44	39	194	2	142	59	67	51	29	23	80	116	1	3	1	56	17	1	42	40	224	5	4
Lysobacter enzymogenes	21	87	24	44	0	51	1	19	2	50	2	6	39	4	11	0	2	242	111	117	24	49	5	1	67	87	125	43	346	0	439	201	91	82	59	52	30	427	3	5	8	40	210	1	180	170	13160	17	3
Bordetella parapertussis	21	8	0	4	1	4	1	3	0	2	1	6	4	0	0	0	5	14	7	137	4	6	6	0	2	1	2	3	18	0	22	9	11	8	3	3	6	11	0	1	0	4	2	0	5	12	57	0	0
Sulfurovum sp.	21	193	32	81	0	180	9	81	11	199	0	14	75	22	30	0	5	592	243	257	94	235	7	0	79	94	115	218	785	6	782	309	380	178	106	80	373	451	2	1	4	234	41	1	227	219	976	18	9
Rickettsiales bacterium TMED269	21	5111	871	2069	0	714	22	2136	390	4199	0	34	4013	783	1003	0	0	2769	1231	294	3217	9538	1	0	2909	3621	4541	9265	30998	0	5826	2295	2744	6718	4325	2928	8321	13522	0	24	40	4867	568	1	887	779	3823	33	12
Methanococcus maripaludis	21	88	19	31	1	124	1	54	11	96	3	10	52	11	15	0	3	367	214	218	37	162	2	0	49	47	62	135	438	3	421	185	98	88	61	44	236	191	3	3	5	218	36	0	145	146	501	14	2
Sporocytophaga myxococcoides	21	292	36	124	0	150	5	161	30	355	1	15	155	30	43	0	2	626	279	232	147	405	8	4	151	175	190	216	1644	2	799	289	436	343	201	138	700	1018	2	8	6	303	78	1	268	239	1282	32	11
Pedosphaera parvula	21	703	165	294	0	487	14	115	15	280	1	8	258	60	70	1	3	1515	713	160	184	379	2	0	124	170	204	100	1857	1	2142	981	1288	337	199	153	160	1210	0	13	23	168	181	0	908	800	4550	17	5
Dysgonomonas sp. GY75	21	8	1	7	1	8	0	7	4	8	3	4	4	0	1	0	3	17	11	128	6	14	2	0	3	1	5	2	28	3	39	15	27	6	2	1	10	16	0	0	1	5	0	0	17	10	65	2	0
Candidatus Kentron sp. MB	21	145	32	61	1	102	3	57	9	107	5	11	59	14	12	1	2	371	170	332	59	156	10	0	47	58	74	135	387	3	496	225	251	98	66	52	212	181	6	5	2	145	32	2	179	139	734	20	1
Salmonella sp. S146_54837	21	86	29	39	0	24	0	12	3	45	0	4	34	7	3	1	0	66	32	164	28	54	1	0	38	47	43	6	212	0	63	27	33	67	57	40	10	96	0	8	3	12	3	0	33	36	154	13	5
Agrobacterium rhizogenes	21	179	42	61	2	144	4	85	8	139	7	11	84	21	20	2	4	452	199	229	90	205	9	0	69	88	101	110	767	5	497	205	218	179	111	65	229	361	2	8	2	152	43	9	241	206	1810	15	2
Sphingobacteriales bacterium 50-39	21	82	14	25	1	71	1	33	12	69	6	16	46	12	13	0	2	248	100	327	36	118	2	1	22	51	43	75	395	3	289	118	143	87	49	28	157	257	4	0	5	86	34	1	107	108	544	12	1
Flavivirga rizhaonensis	21	113	22	39	3	72	3	61	12	99	1	7	65	12	14	0	3	280	121	228	53	130	10	1	35	50	69	108	569	3	396	160	241	124	75	47	194	370	1	2	0	112	33	0	100	87	942	10	4
Pelagibacteraceae bacterium BACL5 MAG-121015-bin10	21	2044	321	836	0	630	26	1406	242	2863	0	26	1462	287	345	0	1	1928	846	506	1456	4276	2	0	1265	1401	1813	3641	10245	0	3475	1367	828	3099	2001	1366	9130	4047	1	22	42	4080	345	0	685	594	2348	200	66
Halobellus sp. Atlit-31R	21	13	2	2	0	8	0	8	0	14	2	4	8	0	1	0	0	33	17	138	4	12	3	0	2	2	2	3	22	0	54	18	27	6	9	3	6	14	0	0	0	24	3	0	16	17	80	1	0
Halotalea alkalilenta	21	99	15	42	0	106	6	28	5	60	2	2	43	10	8	1	2	328	135	116	24	62	12	0	39	43	43	61	283	1	497	206	195	62	38	35	89	138	4	3	3	79	27	3	145	144	907	8	3
Pseudopedobacter saltans	21	148	31	65	1	93	2	78	13	183	1	4	89	21	25	0	2	3271	1358	408	67	253	5	1	73	89	99	126	896	3	427	180	222	152	85	77	359	541	3	4	2	143	60	0	148	129	709	25	8
Stieleria varia	21	471	114	168	1	311	4	84	10	196	2	11	270	45	68	0	1	1037	498	155	139	342	2	0	77	92	116	76	1132	0	1556	649	972	186	118	89	92	745	1	17	22	101	224	1	505	493	2623	13	6
Variovorax boronicumulans	21	25	11	15	0	22	0	11	0	14	4	9	15	3	3	0	7	99	43	135	8	22	9	0	8	9	14	16	82	0	109	43	43	23	9	5	31	52	2	0	2	16	11	2	44	33	222	6	1
Pseudanabaena sp. PCC 6802	21	128	22	46	1	84	2	51	4	85	1	8	50	7	6	1	3	251	117	145	47	110	2	0	83	99	111	56	452	0	470	165	207	237	159	104	110	325	0	4	3	91	49	1	135	115	503	13	6
Candidatus Vecturithrix granuli	21	197	35	96	0	274	5	67	17	173	2	10	104	22	19	1	3	828	332	187	96	243	2	1	62	76	90	161	787	0	1016	449	515	149	85	74	292	420	1	12	4	227	76	2	413	370	1675	22	10
Variovorax sp. PBS-H4	21	29	12	14	0	32	0	9	1	15	2	5	12	1	2	1	2	84	48	193	9	24	7	1	10	11	4	10	122	3	99	31	58	15	6	13	31	48	0	0	1	19	5	1	32	47	211	3	1
uncultured Mediterranean phage uvDeep-CGR2-AD3-C191	21	34	11	2	0	88	2	8	3	21	1	6	11	0	2	0	8	267	133	278	4	26	6	0	14	12	14	13	117	3	358	156	152	31	15	9	35	51	1	0	1	21	6	0	181	144	620	6	1
Hwanghaeella grinnelliae	21	1306	270	491	0	583	12	385	68	791	136	7	598	126	142	10	29	1714	834	98	411	1136	55	3	392	460	543	471	4410	5	2538	1066	1138	975	612	477	974	2176	137	18	42	722	347	62	955	877	4718	89	25
Labilithrix luteola	21	252	66	124	1	144	6	57	8	129	2	7	123	23	23	1	1	512	272	202	81	203	6	0	40	65	73	85	551	2	693	243	360	111	85	60	85	285	2	6	16	123	54	2	210	225	1211	17	12
Methylococcaceae bacterium FWC3	21	20	1	7	0	25	0	8	1	21	2	5	11	0	3	2	1	65	30	195	12	19	3	0	4	9	7	12	58	1	71	30	33	16	9	9	24	19	0	2	1	23	9	2	34	31	133	2	0
Clostridium sp. P21	20	47	15	20	0	22	2	26	3	44	2	6	17	5	6	1	3	69	36	115	28	73	4	0	10	20	20	51	160	2	97	45	46	37	29	23	76	64	0	0	0	68	17	2	24	19	123	4	1
Methylorubrum extorquens	20	128	35	48	0	78	0	29	5	74	8	8	54	13	20	1	3	315	138	111	38	113	9	0	36	35	49	109	326	3	321	142	132	79	51	46	110	135	5	1	3	126	25	7	105	86	734	7	2
Emcibacter congregatus	20	290	45	112	1	180	5	117	26	288	4	8	156	36	31	0	2	613	288	203	123	335	9	0	100	110	131	244	1050	0	883	389	408	221	173	125	458	481	3	5	6	284	64	6	285	274	1295	19	7
Rhodococcus sp. 14-2496-1d	20	17	2	10	0	1	0	5	1	10	1	14	0	1	0	0	2	4	3	242	6	9	1	0	1	0	1	1	2	0	2	0	1	1	0	1	0	0	0	2	1	4	0	0	5	3	11	3	2
Methanocalculus sp. MSAO_Arc2	20	35	4	10	1	10	1	9	1	30	0	8	12	0	2	0	1	31	18	195	11	25	0	1	9	14	11	12	81	1	56	32	20	19	11	7	37	43	0	1	2	52	9	0	19	18	99	6	1
Oceanibaculum indicum	20	309	60	127	0	157	5	77	13	178	8	2	154	25	32	2	6	556	246	111	92	278	6	2	93	112	125	78	1045	2	770	328	342	209	135	101	159	505	5	5	8	167	79	6	266	216	1403	33	12
Aneurinibacillus aneurinilyticus	20	10	2	4	1	21	1	4	1	12	1	6	7	3	2	3	3	55	27	153	6	24	4	0	3	8	8	8	50	7	74	29	34	14	8	5	21	23	1	0	0	19	9	2	32	18	126	4	0
Salinarimonas sp. BN140002	20	123	27	49	0	73	1	41	4	76	4	3	67	14	14	1	2	257	120	89	51	109	4	0	53	58	71	86	429	2	317	143	144	121	65	53	119	198	1	3	2	79	24	2	123	94	502	10	6
Candidatus Lokiarchaeota archaeon CR_4	20	41	6	25	1	34	0	14	3	26	1	5	20	4	2	0	2	100	35	150	16	56	3	0	15	23	35	14	132	2	122	38	48	56	22	23	29	67	3	0	2	39	11	2	63	51	229	2	0
Prochlorococcus sp. HOT212_60m_826P21	20	1604	270	600	0	14	0	1678	281	3386	0	3	122	22	27	0	0	10	5	30	184	570	0	0	66	67	97	7	694	0	3	0	3	147	86	65	87	404	0	13	35	563	481	0	15	3	50	301	96
Pseudomonas sagittaria	20	17	2	14	0	16	1	13	3	29	9	10	16	5	3	2	14	43	12	209	10	30	19	1	14	4	8	7	79	7	72	29	25	10	14	3	15	31	2	2	0	20	5	1	22	24	214	0	1
Edaphobacter aggregans	20	60	14	35	3	110	3	25	3	39	2	7	32	13	4	0	3	381	153	141	17	59	4	0	25	28	32	48	235	1	452	189	207	44	32	19	82	97	1	1	3	64	29	5	136	149	734	9	4
Verrucomicrobiaceae bacterium TMED86	20	1158	273	528	3	625	18	219	32	478	6	16	810	166	205	0	2	2052	974	208	392	992	5	1	261	328	439	91	3615	2	4780	2020	2115	824	556	372	146	2458	1	56	66	117	423	2	1003	950	5272	17	4
Aliivibrio fischeri	20	111	17	50	1	69	2	55	8	99	6	7	58	6	4	1	3	248	112	188	45	145	6	2	63	54	73	74	474	1	333	135	149	139	74	63	189	233	2	3	1	85	39	3	115	113	1022	23	9
Chitinophaga sp. SYP-B3965	20	49	6	16	0	32	2	22	1	45	2	6	23	6	4	0	2	110	60	235	15	62	4	0	19	19	24	35	129	0	157	63	78	30	28	12	80	59	0	1	5	56	12	2	46	35	236	10	2
Paraburkholderia oxyphila	20	36	5	11	0	15	0	12	2	32	2	12	8	5	3	1	5	51	35	258	9	33	5	0	9	11	15	22	74	0	97	33	46	17	15	8	21	28	1	0	3	25	6	1	39	21	159	3	2
Erythrobacter phage vB_EliS_R6L	20	0	0	1	0	0	0	1	0	0	0	4	0	0	0	0	2	5	2	61	0	0	2	0	0	0	0	0	1	1	0	0	0	0	0	0	0	0	0	0	0	2	0	1	3	1	14	0	0
Labrenzia aggregata	20	263	52	120	0	173	5	90	9	204	20	10	163	26	41	0	9	636	294	260	105	279	41	4	90	120	134	143	1398	4	744	352	410	250	166	128	317	609	17	9	8	216	129	29	700	684	15165	30	8
Haloferula luteola	20	189	41	75	2	89	2	34	11	109	2	8	154	25	35	0	3	378	185	213	54	172	4	1	43	56	77	47	500	0	468	248	289	94	84	62	71	283	2	10	13	64	75	0	143	161	851	6	0
[Ruminococcus] gnavus	20	42	11	25	1	100	0	26	1	41	0	6	22	4	6	2	2	323	156	144	18	65	4	1	12	19	23	29	190	2	470	182	191	42	19	10	63	84	2	0	2	61	22	0	149	109	494	6	5
Rhodospirillaceae bacterium TMED23	20	1875	375	827	0	1158	38	651	106	1392	7	6	1037	182	256	0	1	3711	1676	223	793	2162	2	1	1672	2172	2614	1027	21954	1	8176	3356	4179	4609	2912	2111	2625	10910	5	29	46	979	637	6	1743	1609	8034	121	38
Crocinitomicaceae bacterium TMED135	20	1147	201	486	1	92	3	1066	189	2175	2	25	789	133	176	0	1	407	159	265	898	2439	2	0	402	490	589	630	4891	2	606	245	311	941	637	405	1245	3109	0	16	19	632	290	0	127	102	560	508	158
Pseudobacteriovorax antillogorgiicola	20	617	101	289	1	307	7	172	25	388	0	10	304	68	62	0	5	997	466	316	256	744	9	0	107	159	191	833	1422	0	1107	438	577	278	177	119	835	721	1	17	21	590	129	1	442	338	1482	23	12
Flavobacteriales bacterium 34_180_T64	20	117	26	41	4	62	1	70	22	152	4	8	105	13	17	0	4	214	78	193	70	165	6	0	78	75	102	116	787	1	308	103	188	157	122	68	283	549	1	2	3	82	35	1	77	109	912	17	3
Leptospira ognonensis	20	72	17	38	0	96	2	49	6	95	3	4	48	10	13	0	1	306	143	75	35	112	0	0	41	57	65	118	482	2	417	175	185	125	67	44	209	251	0	1	4	96	26	0	117	96	470	10	4
Synechococcus sp. N19	20	3158	924	1299	0	25	1	784	99	2059	2	34	2986	664	748	0	1	112	67	333	1107	2448	6	0	182	244	305	23	1395	1	11	10	6	547	345	298	19	1265	0	7	4	56	82	0	13	12	18	34	8
Paraburkholderia sp. LD6	20	27	8	11	1	13	0	8	0	23	3	3	18	2	1	2	1	61	26	61	11	20	0	0	11	13	10	15	94	1	83	25	30	13	10	10	19	40	3	0	1	24	4	0	21	26	130	5	0
Herbaspirillum sp. ST 5-3	20	69	12	29	0	46	0	22	2	34	3	6	25	12	5	0	6	188	91	135	19	54	9	0	21	28	28	36	228	3	212	119	110	54	34	23	68	133	5	4	1	55	15	2	84	72	333	6	0
bacterium HR23	20	176	38	82	1	1034	37	53	15	126	3	7	72	15	14	0	5	2908	1321	130	71	200	2	0	46	55	73	302	569	2	2371	980	1390	70	47	31	240	198	1	12	25	1355	372	2	1998	1733	8633	5	3
Solirubrobacter sp. URHD0082	20	55	10	13	1	85	4	19	0	26	4	3	20	2	7	1	4	269	115	125	10	59	6	0	14	20	21	49	195	3	385	174	186	40	29	22	67	90	0	5	1	65	18	1	123	153	587	4	1
Planctomycetes bacterium K23_9	20	481	87	196	0	358	17	88	12	213	1	14	314	79	66	0	5	1154	553	308	140	418	6	0	93	104	140	66	1228	2	1764	799	1111	206	114	111	104	812	1	23	26	69	234	6	550	523	2885	31	6
Methylococcales symbiont of Iophon sp. n. MRB-2018	20	128	21	36	0	70	3	34	5	79	3	3	44	11	7	0	2	251	102	102	50	136	1	0	78	111	133	112	467	0	360	171	127	182	123	92	147	248	1	3	4	75	21	0	105	91	444	24	7
Desulfovibrio brasiliensis	20	34	5	20	0	36	0	17	4	23	2	4	16	4	0	2	2	124	58	99	20	49	4	0	17	17	30	59	177	0	172	54	79	24	32	23	59	83	1	1	0	57	15	0	58	48	262	5	2
Hespellia stercorisuis	20	13	3	7	0	15	0	5	0	12	0	8	6	1	1	1	0	43	16	148	8	20	3	0	6	16	14	22	45	1	53	22	19	15	3	7	54	31	0	0	0	32	7	0	15	23	73	2	2
Candidatus Altiarchaeales archaeon A3	20	23	4	7	0	26	1	13	3	30	0	11	9	2	4	0	2	94	48	209	15	30	2	0	24	15	24	29	135	0	114	40	40	35	15	22	74	59	0	1	1	27	11	0	50	31	157	1	0
Winogradskyella sp. PG-2	20	132	20	60	0	61	0	80	18	170	2	6	89	18	23	0	3	226	95	239	74	184	7	0	69	72	120	94	729	2	345	143	178	159	119	77	248	494	1	4	5	153	68	1	322	253	4857	16	2
Candidatus Peregrinibacteria bacterium CG10_big_fil_rev_8_21_14_0_10_55_24	20	37	3	18	2	21	0	9	1	23	1	8	20	3	5	0	6	75	34	125	18	31	3	1	8	9	10	16	63	1	99	30	48	17	9	7	37	48	2	1	3	30	10	0	41	31	185	1	0
uncultured Desulfobacterium sp.	20	394	82	154	1	383	11	104	17	247	3	9	187	30	47	2	2	1154	446	255	130	398	2	1	87	111	144	321	1101	1	1396	584	593	227	136	90	406	528	1	3	13	379	81	3	504	455	2067	29	5
Clostridium sp. CAG:1193	20	10	2	5	0	20	0	13	2	19	1	6	6	3	3	0	6	54	33	192	12	27	6	0	8	13	11	18	68	3	47	29	29	12	8	7	29	33	1	0	0	25	4	2	16	15	94	3	1
marine actinobacterium MedAcidi-G2A	20	8510	1468	3415	0	241	4	2393	446	4943	0	51	2431	502	549	0	1	987	518	412	2086	5732	0	0	1174	1639	1871	9444	25632	0	1860	798	827	2144	1371	927	12987	12378	0	61	113	10084	1056	0	344	370	1396	33	11
Martelella mediterranea	20	4725	1792	2076	1	2001	48	97	15	230	36	35	836	191	234	14	63	6057	3160	173	118	306	116	15	83	88	103	116	1840	1	648	260	1266	158	122	92	209	997	19	154	199	253	298	459	10943	10903	86754	503	97
Burkholderia cenocepacia	20	109	27	38	1	110	1	34	2	68	6	8	51	8	17	5	6	307	153	291	39	97	12	0	42	54	60	61	319	1	399	199	197	83	59	54	65	167	3	8	3	94	24	3	182	173	1021	24	9
Pseudomonas chlororaphis	20	84	24	34	0	52	2	40	1	79	2	6	49	18	8	0	8	166	96	143	26	108	17	1	37	42	52	63	329	0	264	118	154	95	46	40	102	133	3	5	7	81	37	1	108	106	813	17	1
Limosilactobacillus reuteri	20	75	13	21	0	60	2	24	4	59	3	3	26	8	14	0	1	195	84	180	22	74	6	1	21	26	39	49	305	3	213	70	63	68	40	36	91	178	0	1	4	70	22	0	87	83	279	9	0
Candidatus Kentron sp. SD	20	106	11	37	1	83	1	38	6	100	1	8	50	12	18	0	5	261	116	206	40	143	3	0	28	38	47	107	340	2	383	175	168	72	55	52	120	162	4	1	4	113	27	2	146	124	576	9	1
Devosia sp. 66-22	20	114	20	55	2	51	2	62	14	119	5	8	90	10	21	2	7	200	113	137	63	161	7	0	31	37	47	58	320	2	215	95	110	91	59	30	138	166	1	5	4	109	32	1	98	86	448	13	1
Butyrivibrio fibrisolvens	20	82	15	25	0	47	1	42	8	92	1	6	27	7	2	0	2	153	64	150	34	114	3	0	30	34	22	45	212	0	187	62	54	63	35	30	106	92	0	4	2	103	18	2	64	54	223	33	4
uncultured marine bacterium HF10_45G01	20	5026	870	1917	1	166	6	2994	528	6078	0	37	3751	739	919	0	0	596	260	795	3783	10562	1	0	1081	1231	1521	3802	8970	0	1124	484	198	2421	1625	1085	7408	3544	0	32	68	6369	477	0	162	150	523	336	118
Brevibacterium senegalense	20	17	5	11	0	20	1	5	0	14	2	7	8	2	2	0	3	61	19	124	3	13	2	1	12	11	16	13	52	2	88	37	43	14	8	12	9	34	3	1	0	17	7	2	40	27	363	1	1
uncultured proteobacterium RedeBAC7D11	20	542	77	237	0	20	1	357	82	754	0	7	227	31	59	0	0	74	33	228	178	557	0	0	12	25	37	109	186	0	96	39	36	59	30	24	128	104	0	5	7	680	18	0	29	21	98	107	35
Desulforegula conservatrix	20	113	23	44	1	138	2	38	7	97	6	12	45	13	12	0	4	434	198	342	47	139	6	1	26	48	59	85	366	5	582	228	246	62	33	30	144	197	2	1	3	140	43	4	182	150	740	12	3
Parachlamydia sp. C2	20	79	11	28	0	47	1	20	5	45	1	10	28	8	4	0	3	156	78	224	20	76	3	0	24	34	57	43	244	2	185	79	107	59	50	40	83	144	0	2	3	102	55	1	98	89	801	7	4
Bacteroidetes bacterium 37-13	20	158	23	66	2	108	1	97	17	227	6	8	106	24	23	0	1	314	122	209	107	256	5	1	83	106	150	126	947	3	435	201	269	211	126	93	335	596	3	5	4	171	49	1	181	144	845	27	9
Methanophagales archaeon	20	170	39	81	0	255	8	64	13	127	2	9	79	10	17	0	4	765	308	264	80	201	4	0	51	68	80	142	562	2	784	316	332	118	74	54	252	264	3	5	6	209	52	2	363	323	1360	14	5
Alteromonas sp. V450	20	129	27	50	0	126	1	12	2	29	2	1	28	7	2	0	0	440	164	40	4	23	3	0	104	127	142	283	428	0	437	235	46	129	95	66	252	388	0	12	18	73	186	0	234	198	9839	7	2
Aquimarina longa	20	107	14	48	0	47	3	51	14	112	4	9	71	7	20	0	3	211	84	203	45	132	9	0	54	36	72	95	574	6	183	84	94	132	82	46	194	315	4	4	2	60	39	1	100	77	1252	10	2
Brachyspira aalborgi	20	79	17	21	2	46	3	46	9	77	2	12	33	3	7	0	0	153	71	154	49	116	2	0	51	48	48	61	320	0	165	70	73	119	75	46	175	166	0	6	4	113	19	0	62	65	214	36	8
Lentisphaerae bacterium GWF2_52_8	20	92	15	39	0	140	5	38	12	75	1	0	52	8	19	2	3	469	200	166	35	135	4	1	41	50	58	79	443	1	561	220	303	119	74	43	182	205	0	2	6	135	43	1	189	182	940	4	3
Fuerstia marisgermanicae	20	668	180	282	1	992	25	115	24	305	0	20	579	130	169	0	3	3150	1475	287	262	564	3	0	128	175	178	120	1829	1	5041	2156	3063	299	204	156	240	1188	1	38	55	195	567	3	1316	1274	6972	10	1
Emticicia aquatilis	20	98	27	42	1	77	4	66	10	104	4	3	64	7	14	0	4	207	109	189	42	165	3	0	43	55	78	76	479	1	321	105	154	99	47	47	226	297	0	3	3	102	27	0	112	93	439	8	3
Aeromonas caviae	20	54	12	19	0	52	1	12	0	30	7	2	20	3	7	1	2	149	68	157	16	50	8	0	25	30	33	53	177	0	213	100	85	60	34	25	70	87	3	2	2	49	15	4	88	81	566	15	6
Cloacibacillus porcorum	20	27	5	12	0	22	1	22	0	43	3	5	20	3	2	1	8	74	28	143	17	33	5	0	17	23	9	48	99	2	93	30	39	26	15	19	76	64	1	2	1	38	6	1	30	35	142	3	0
Pseudactinotalea sp. HY160	20	3	1	2	1	1	0	6	0	3	0	10	2	2	1	0	5	13	7	131	4	7	9	0	3	2	1	1	5	0	4	4	4	1	0	5	2	1	0	0	0	6	1	0	3	3	19	1	0
Candidatus Thermochlorobacteriaceae bacterium GBChlB	20	73	15	39	0	112	4	36	9	56	5	5	36	5	10	1	5	368	174	158	45	94	4	0	25	24	32	84	290	2	494	202	253	53	35	24	158	181	2	2	2	127	52	1	120	110	613	5	2
Methylomonas koyamae	20	73	13	32	1	97	2	29	3	54	4	4	41	9	6	2	4	281	128	188	24	96	7	2	21	33	32	71	233	0	451	181	220	55	39	17	85	119	0	1	2	65	33	0	193	156	782	3	0
Bradyrhizobium elkanii	20	92	27	30	1	49	1	25	6	59	0	15	44	14	10	1	10	224	96	227	27	82	14	1	38	44	46	46	307	4	300	114	154	74	42	19	111	162	2	1	4	74	28	5	118	93	535	7	1
Rhizobium sp. Leaf341	20	0	1	0	0	5	0	5	1	3	4	5	3	1	0	0	6	6	4	157	0	5	3	0	3	6	2	3	16	2	11	5	6	5	3	2	2	9	3	0	0	2	2	3	7	6	109	2	0
Flavobacterium dankookense	20	29	6	9	0	15	3	26	8	49	4	9	26	5	6	0	6	53	30	287	12	48	4	1	19	20	22	23	234	0	77	30	35	43	27	15	56	138	1	0	3	26	15	0	26	28	352	7	2
Muricauda beolgyonensis	20	87	15	30	1	39	1	45	4	100	8	3	56	6	8	0	7	168	72	52	36	118	4	1	39	36	51	57	363	0	151	54	77	83	65	44	76	212	3	2	3	98	35	1	221	189	3304	13	0
Hyphomicrobium sulfonivorans	20	114	27	42	0	43	1	47	9	87	3	7	59	10	12	0	3	181	72	241	49	133	6	0	39	56	56	107	463	0	221	92	97	98	82	49	150	204	1	1	2	131	32	2	70	57	492	9	2
Emticicia sp. BO119	20	44	16	19	0	49	4	28	7	61	2	8	21	5	7	0	6	158	85	254	24	88	5	0	23	32	27	51	271	4	199	61	133	62	45	32	169	161	1	3	1	92	19	1	72	59	324	6	0
Synechococcus sp. BOUM118	20	287	54	111	0	10	1	84	16	244	1	6	120	29	34	0	3	41	16	232	48	113	3	0	82	102	129	19	682	0	67	26	29	253	157	137	49	558	0	4	4	30	36	0	16	6	61	12	1
Sphingobium sp.	20	68	14	19	2	151	5	27	6	63	11	5	66	18	21	0	9	485	221	139	32	85	7	2	27	35	42	93	295	0	327	135	387	65	39	30	108	139	2	15	21	274	76	8	856	815	5783	8	5
Hypericibacter adhaerens	20	430	84	148	1	464	16	141	25	302	6	20	179	36	56	1	13	1487	665	271	161	421	13	2	160	209	219	340	1668	1	1976	818	898	379	253	184	547	720	6	7	11	388	117	4	664	599	3034	27	8
Gaeavirus sp.	20	44	14	20	0	19	0	23	1	45	0	8	19	0	2	0	3	57	26	263	33	73	6	0	40	54	42	24	129	0	74	31	20	85	56	48	117	88	1	3	3	78	12	4	36	24	98	10	4
uncultured marine thaumarchaeote KM3_54_G11	20	68	19	27	0	9	0	9	4	30	2	6	58	13	16	0	7	25	11	160	32	83	12	0	181	188	241	949	1459	0	50	24	21	425	247	162	1268	538	0	2	2	1334	53	1	22	24	61	0	0
Henriciella algicola	20	59	15	25	0	65	1	26	3	34	6	5	48	12	14	1	5	266	134	97	21	63	8	0	19	20	24	47	210	0	137	60	79	36	31	25	66	80	0	3	4	179	201	24	677	631	10860	7	0
Vulgatibacter incomptus	20	202	51	66	0	154	5	65	10	131	0	8	88	19	25	1	2	434	182	212	61	149	2	0	35	46	57	89	497	0	546	249	323	94	36	33	111	252	1	3	6	120	75	0	202	172	1036	10	2
Pseudoalteromonas sp. SM1988	20	190	23	66	1	76	4	70	16	129	5	11	86	15	17	1	1	253	105	245	66	160	3	0	45	54	70	137	560	1	377	156	134	96	62	62	222	277	1	1	4	124	33	1	88	88	482	16	2
Cellvibrionales bacterium TMED122	20	6342	1493	2601	0	696	23	2075	319	4706	1	43	4159	889	1002	0	4	2231	987	575	2086	5441	8	0	804	961	1224	1636	7728	0	2986	1263	1043	1997	1305	888	4684	3509	2	86	133	3093	769	1	910	742	3202	977	232
Yersinia enterocolitica	20	45	8	21	1	55	3	25	1	55	2	7	42	5	15	0	4	190	78	226	22	65	3	0	25	37	48	44	215	2	238	112	92	65	36	29	109	125	1	4	5	78	22	3	85	100	662	9	6
Mycolicibacterium moriokaense	20	86	16	48	1	57	2	31	3	55	1	18	42	7	8	1	5	254	121	291	28	74	8	3	23	23	21	36	191	5	420	171	157	45	25	24	36	101	0	6	7	72	30	4	123	128	705	6	0
Streptomyces phage Coruscant	20	7	1	2	0	2	0	1	1	2	5	8	0	0	0	3	1	5	4	224	3	3	4	1	2	2	3	0	12	5	10	2	6	4	7	1	5	8	1	0	0	10	0	0	3	7	11	0	0
Virgibacillus profundi	20	147	22	56	2	249	8	58	7	93	3	5	81	13	12	0	1	863	401	173	65	167	2	0	71	106	105	241	515	2	1178	495	150	155	120	86	257	203	2	7	5	297	19	0	394	341	813	16	6
Fastidiosibacter lacustris	20	120	16	45	3	74	1	54	11	86	1	8	64	12	13	0	1	201	95	129	42	162	7	0	53	82	91	107	424	0	340	130	149	109	84	55	158	273	1	1	4	103	26	1	116	98	452	12	8
Sphingobacteriales bacterium 44-61	20	16	3	6	0	4	0	13	0	22	1	2	8	2	1	0	0	31	26	123	9	20	4	0	13	12	10	19	97	1	53	17	35	15	8	1	34	64	0	0	0	12	3	3	22	10	83	1	0
Magnetospirillum sp.	20	173	29	64	0	100	1	44	6	105	2	5	82	18	20	1	3	393	193	226	64	130	3	2	50	55	75	76	596	1	498	209	204	136	94	58	142	281	2	2	6	129	53	3	187	167	806	14	4
uncultured marine group II/III euryarchaeote KM3_17_G02	19	5	0	3	3	2	0	2	1	6	3	10	0	0	0	1	6	12	6	153	1	2	4	0	3	2	5	4	38	12	15	8	8	7	6	3	6	23	4	1	0	6	4	1	6	4	56	1	0
Roseovarius indicus	19	202	42	92	0	152	6	79	8	148	39	7	102	28	23	1	7	545	228	129	80	186	25	4	62	79	100	105	951	6	831	307	382	189	137	79	231	408	75	5	5	153	56	15	285	279	2918	33	14
Rhodospirillaceae bacterium BRH_c57	19	220	42	86	1	139	6	81	13	160	8	4	98	22	21	3	10	503	212	183	80	233	13	0	72	93	137	110	900	3	570	275	258	211	147	90	238	394	8	3	8	194	87	6	215	201	921	22	3
Methylobacterium sp. ZNC0032	19	1	2	4	1	1	1	3	0	9	4	9	8	3	2	2	4	14	8	196	8	23	16	1	2	4	6	7	26	2	13	3	7	9	6	4	16	26	0	0	0	12	1	0	7	11	113	0	0
Polaribacter sp. IC073	19	47	16	16	2	16	0	23	3	45	10	4	27	11	3	2	0	85	32	155	18	82	6	0	19	31	46	31	269	1	162	59	75	52	33	31	96	166	0	1	1	31	14	1	30	24	194	7	5
Ancylobacter aquaticus	19	44	12	20	2	34	1	17	2	32	2	4	28	4	6	0	4	101	45	126	13	65	10	0	23	22	30	36	235	0	150	72	76	53	33	23	54	96	2	0	2	43	9	7	53	50	636	10	1
Kitasatospora viridis	19	43	9	17	1	37	0	12	6	28	3	10	11	4	6	1	2	85	49	314	15	30	6	2	13	17	20	29	88	0	90	42	52	37	24	12	24	25	3	2	6	21	3	0	43	39	183	14	3
Myxococcales bacterium 68-20	19	255	72	94	1	194	5	70	13	162	1	9	123	28	37	0	0	642	296	162	81	184	2	0	47	71	63	79	541	1	718	286	406	113	51	38	104	278	0	10	13	97	58	1	239	272	1306	26	5
Candidatus Prometheoarchaeum syntrophicum	19	49	7	20	1	64	3	29	6	50	0	8	38	10	10	0	0	262	95	269	43	98	5	0	50	40	54	51	291	1	251	108	133	102	47	39	119	137	0	6	1	106	24	1	87	78	354	6	3
Actinoplanes sp. ATCC 53533	19	48	17	14	0	31	1	10	3	24	1	2	20	9	1	0	1	89	49	84	19	46	4	0	10	16	11	15	80	1	129	66	68	25	14	13	14	40	3	5	5	15	7	0	44	51	234	8	0
uncultured marine bacterium EB80_69G07	19	4905	809	1871	0	174	5	3102	620	6414	0	35	2514	511	583	1	0	615	247	967	2829	8233	0	0	1176	1377	1683	3109	8622	0	1060	451	262	2837	1833	1304	8789	3449	0	50	58	6193	482	0	228	173	714	434	134
Elusimicrobia bacterium GWD2_63_28	19	50	5	20	1	42	1	17	6	35	2	12	20	5	8	1	2	174	74	249	17	65	5	0	19	16	31	35	159	0	206	82	90	48	24	18	83	72	1	0	6	57	14	0	58	54	294	5	0
Salinivirgaceae bacterium	19	126	16	65	1	80	2	76	10	160	1	18	85	22	14	1	5	320	138	329	83	224	4	1	70	74	127	84	880	3	470	195	266	171	119	76	230	576	1	4	2	116	44	1	164	139	725	20	7
Rhizobium sp. MHM7A	19	14	1	3	0	7	2	8	0	11	1	3	6	1	1	1	0	30	10	69	5	21	1	0	5	3	6	5	44	0	34	19	18	3	2	4	7	15	1	1	0	12	6	0	13	12	85	2	0
Nodosilinea nodulosa	19	41	15	16	0	44	0	17	4	38	4	13	22	3	7	3	3	140	65	235	9	60	5	0	30	25	31	27	160	1	173	87	101	70	42	20	40	106	3	3	3	40	15	3	70	71	353	6	6
Puteibacter caeruleilacunae	19	223	37	102	1	132	3	116	20	207	2	8	148	34	28	1	0	444	195	223	116	277	5	0	74	112	125	138	942	1	628	230	365	185	119	80	262	633	2	1	4	155	88	5	215	192	1024	27	7
Phenylobacterium sp.	19	500	116	218	0	314	10	189	24	416	10	8	260	43	61	4	12	997	470	275	229	545	30	6	164	197	197	346	1716	1	1355	641	596	421	256	148	570	784	11	12	16	479	133	4	515	427	2623	39	10
Thermotoga sp.	19	83	18	34	1	110	2	37	9	81	7	9	47	14	6	2	5	301	149	179	37	119	3	0	34	30	38	77	408	2	399	155	235	93	55	27	218	187	2	2	4	144	38	3	159	145	703	4	2
Sinobacteraceae bacterium	19	230	41	80	2	188	3	84	13	169	9	7	114	22	29	0	12	604	290	198	87	253	126	19	54	60	77	196	583	7	878	374	410	129	84	71	252	289	3	6	8	217	86	7	251	242	1680	18	5
Blastocatellia bacterium AA13	19	158	28	56	0	312	6	48	6	101	2	4	71	25	24	0	2	938	437	122	66	160	4	0	45	57	68	99	557	0	1063	435	564	86	61	44	178	275	0	4	7	151	68	0	436	412	2520	6	0
Cytophagales bacterium TFI 002	19	215	38	64	3	82	4	88	16	197	1	12	132	32	20	0	3	379	143	330	128	295	9	4	106	113	152	187	1066	2	458	214	235	210	129	89	432	701	4	2	4	192	62	3	140	117	738	26	6
uncultured phage MedDCM-OCT-S09-C14	19	1	0	1	0	0	0	0	0	0	2	4	0	0	0	0	6	0	0	108	0	0	7	1	0	0	0	0	0	2	0	0	0	0	0	0	0	1	0	0	0	0	0	0	0	0	0	0	0
Leptobacterium flavescens	19	189	38	75	0	107	1	97	23	270	7	15	153	28	32	0	6	452	176	237	114	315	12	0	101	132	153	189	1213	0	512	223	261	270	165	117	473	774	2	1	4	182	73	0	172	121	1515	25	4
Runella sp. HYN0085	19	25	3	9	2	24	0	8	2	28	2	7	15	4	3	1	4	60	22	124	7	41	1	0	4	6	13	26	75	0	53	38	45	18	8	7	57	46	0	1	2	32	6	1	28	25	134	2	1
Gammaproteobacteria bacterium RIFCSPLOWO2_02_FULL_57_10	19	704	125	286	1	467	14	174	33	379	97	6	359	57	66	10	57	1664	806	125	247	628	229	26	80	99	132	195	1287	6	3265	1313	1548	202	135	92	245	679	59	22	22	335	209	15	839	748	3935	26	10
Bradyrhizobium diazoefficiens	19	64	14	28	1	41	1	26	5	70	7	7	28	10	7	2	1	156	89	180	27	77	8	1	26	35	36	51	220	1	198	91	94	44	33	30	59	127	1	3	2	59	11	3	68	70	425	10	3
Cutibacterium acnes	19	143	27	59	6	89	1	33	2	73	11	5	85	13	16	1	15	358	192	245	28	77	11	0	22	33	30	75	211	2	694	340	155	49	35	27	65	89	17	5	4	99	18	13	185	194	469	16	5
Bifidobacterium longum	19	89	17	37	1	75	5	35	0	50	3	12	47	9	13	0	2	185	78	156	33	75	6	1	42	49	59	61	293	2	215	98	125	95	65	46	90	130	0	1	10	81	30	0	102	108	437	31	4
Fibrisoma montanum	19	49	12	12	2	26	2	18	2	28	2	8	32	5	3	0	3	113	64	261	22	63	3	0	14	17	21	33	170	0	120	54	76	41	25	19	56	120	0	1	3	60	11	1	50	46	248	4	0
Alcanivorax sp. ZXX171	19	1165	552	515	3	33	2	7	2	8	35	0	8	2	0	13	81	43	23	7	9	22	129	15	4	7	11	54	72	0	263	123	207	11	13	8	19	46	46	4	5	35	23	19	205	187	1818	3	2
Zooshikella ganghwensis	19	264	60	99	1	137	2	111	22	210	5	8	125	23	42	2	4	518	245	261	126	322	15	1	67	76	107	223	837	2	805	317	357	161	105	72	290	369	2	6	2	202	83	1	230	217	1115	25	8
Rhizobium sp. BK650	19	16	4	9	2	18	0	4	2	10	2	4	4	3	1	1	8	76	40	132	6	9	15	0	3	2	5	5	49	6	82	37	35	11	10	6	8	28	2	0	0	9	4	6	38	31	175	0	0
Parabacteroides merdae	19	24	9	14	0	35	2	14	3	29	1	2	27	5	5	0	1	78	43	112	17	36	3	0	10	17	18	19	141	0	106	37	59	28	9	9	31	81	0	0	3	30	12	0	36	25	175	5	0
uncultured phage MedDCM-OCT-S11-C178	19	1	0	1	0	0	0	0	0	2	3	4	0	0	0	1	2	0	0	113	0	2	1	0	0	1	0	0	0	0	0	0	0	0	0	1	0	0	0	0	0	0	1	0	0	0	0	0	1
Tenacibaculum sp. KUL113	19	42	10	17	0	69	0	3	2	10	0	6	14	2	3	1	0	215	86	30	6	12	4	0	61	96	108	121	299	0	288	155	15	74	55	32	76	340	0	4	5	37	62	0	123	99	6444	5	1
Haemophilus parainfluenzae	19	103	19	37	0	61	3	44	10	88	5	2	62	10	10	0	4	246	84	135	47	127	5	0	33	35	38	85	271	0	255	132	116	62	42	37	141	134	0	1	5	96	24	1	88	92	391	11	5
Rhodovastum atsumiense	19	193	35	68	0	123	1	69	6	148	2	6	82	15	27	1	4	440	194	143	67	201	9	1	65	88	84	135	650	1	568	249	230	155	110	81	207	346	3	5	7	178	60	3	196	183	872	16	4
Filimonas lacunae	19	57	7	22	0	34	1	25	6	43	2	4	24	6	5	0	1	133	47	105	22	57	1	0	15	21	41	46	256	0	170	60	80	41	36	19	84	150	0	0	2	60	16	0	34	42	251	5	1
Azospirillum lipoferum	19	338	75	141	1	188	4	104	14	229	15	5	129	24	32	0	6	683	333	182	109	271	6	0	102	135	175	138	1248	2	842	342	348	256	180	117	180	614	7	12	18	160	95	9	296	275	1513	33	6
Erythrobacter sp. EhN03	19	1	1	0	0	91	2	0	1	0	9	3	23	6	11	2	17	431	212	9	2	4	19	3	2	1	4	22	104	0	86	24	115	9	7	3	16	62	0	4	3	90	40	11	111	111	5811	2	0
Coleofasciculus chthonoplastes	19	121	20	48	1	82	3	37	4	73	5	8	65	11	16	0	1	236	119	230	49	144	11	0	63	77	130	45	479	1	326	145	180	225	162	102	113	274	3	5	6	73	50	0	157	127	622	15	6
Cafeteria roenbergensis virus	19	160	27	77	0	60	3	104	23	231	2	23	92	24	21	0	2	190	81	496	140	419	2	0	71	67	92	48	482	2	312	129	120	163	104	67	352	312	0	4	7	246	67	0	144	104	368	36	13
Magnetococcus marinus	19	145	35	68	0	164	5	58	13	120	3	7	82	15	22	0	4	473	222	164	69	184	7	0	48	81	85	95	612	3	584	273	274	146	92	56	207	301	6	7	5	153	55	2	223	176	954	12	6
Pseudanabaena sp.	19	38	11	22	1	46	1	19	2	46	4	13	20	6	8	0	4	148	67	275	25	63	4	0	24	26	26	30	175	4	147	70	77	39	30	23	52	89	0	1	3	63	28	2	58	53	234	8	2
Planctomycetes bacterium Poly30	19	289	63	108	1	419	5	65	11	176	7	10	152	33	44	0	8	1317	676	234	85	220	2	1	54	68	105	145	689	3	2034	886	1229	126	83	81	154	449	1	8	12	167	82	5	560	553	3961	20	9
Verrucomicrobiae bacterium Tous-C4TDCM	19	169	33	62	0	107	2	34	4	80	0	11	110	30	25	0	2	353	168	145	47	156	4	0	49	50	39	30	484	1	606	279	351	124	50	42	30	276	1	13	10	29	65	2	161	166	918	7	3
Salinispora arenicola	19	49	17	20	0	43	2	13	2	32	3	5	21	2	8	0	5	165	115	170	10	35	12	2	19	27	25	21	111	0	260	106	94	30	16	20	28	62	1	9	7	36	12	1	94	111	396	13	0
Paraburkholderia tropica	19	47	8	16	0	40	0	20	1	27	1	3	15	3	6	1	3	123	60	105	15	39	3	1	8	7	12	17	95	1	178	79	71	24	11	8	24	51	1	2	2	41	6	0	62	54	290	8	2
Crocosphaera watsonii	19	220	49	81	0	86	5	63	9	121	1	3	81	15	17	0	2	356	143	190	70	195	1	0	72	98	128	106	533	2	392	149	213	212	150	102	174	303	0	9	7	110	70	0	174	164	812	25	5
Pararhodospirillum photometricum	19	1880	340	810	1	487	10	464	70	987	20	13	800	148	163	3	8	1656	814	164	436	1264	24	0	336	454	548	1434	4048	4	2362	1016	814	902	603	458	1303	1874	20	26	25	1273	185	11	766	675	5263	102	20
Thermopetrobacter sp. TC1	19	262	43	108	0	151	3	103	15	201	6	6	139	28	47	0	2	535	217	177	107	277	2	1	98	121	145	232	1015	1	764	313	313	268	168	105	353	459	4	3	4	268	63	1	227	222	952	17	6
Ralstonia insidiosa	19	19	3	7	0	7	0	3	1	12	1	9	12	1	2	0	6	28	13	145	8	13	9	1	9	11	5	5	45	0	43	14	15	14	9	6	4	37	1	0	0	9	5	0	5	8	137	3	0
Burkholderia ambifaria	19	70	44	30	0	46	3	23	6	53	1	6	33	9	8	1	2	165	68	144	29	72	3	0	27	35	35	36	214	0	179	71	80	75	40	41	50	100	0	6	8	56	25	2	77	83	385	40	4
Bdellovibrio sp.	19	252	47	84	0	159	2	79	7	159	1	12	108	19	31	0	0	609	275	255	89	245	7	0	199	249	313	2027	1960	0	690	293	344	256	174	131	843	422	0	13	10	626	76	1	1351	1169	2040	23	9
Flexibacter flexilis	19	118	20	49	0	57	1	61	16	141	7	12	69	15	14	2	3	308	107	364	67	183	2	3	75	64	86	113	627	1	366	148	209	145	87	62	205	408	2	1	8	156	43	2	147	129	611	10	4
Oryzomicrobium terrae	19	56	10	30	0	41	3	14	1	36	5	5	26	5	3	0	1	124	60	136	20	58	15	0	14	11	26	47	175	0	195	72	86	35	25	17	59	79	1	3	1	26	5	2	67	60	320	5	1
Clostridia bacterium	19	193	28	63	0	167	8	59	6	122	2	9	67	21	21	1	3	593	276	196	69	151	6	0	48	51	57	108	427	0	697	293	360	102	60	48	169	212	1	4	8	199	64	5	306	214	1271	14	3
Burkholderia territorii	19	61	14	24	1	28	1	13	2	25	1	3	16	4	9	0	5	70	41	171	25	41	3	0	29	18	28	21	98	0	91	42	41	33	22	20	25	38	1	1	5	19	11	3	55	57	204	16	3
Pantoea agglomerans	19	48	6	13	2	27	0	6	1	25	3	3	13	3	2	0	1	72	35	130	16	30	8	1	16	17	18	19	92	5	100	49	60	24	24	14	25	39	0	1	2	19	11	1	48	44	264	7	2
Planktothricoides sp. FACHB-1261	19	66	26	25	0	0	0	13	1	31	0	2	1	1	2	0	0	4	1	17	17	65	5	1	128	79	109	23	47	0	1	0	1	100	71	58	43	20	0	2	6	16	0	0	1	3	5	16	6
Hyphomonadaceae bacterium	19	265	51	112	1	85	2	122	19	247	3	4	137	28	40	0	2	332	144	144	124	338	8	0	106	135	140	220	995	0	380	170	165	234	157	124	463	424	2	3	1	289	54	2	135	129	629	25	5
Planktothrix serta	19	196	37	90	0	23	1	72	15	154	2	1	47	21	20	0	1	56	35	65	27	98	0	1	83	115	105	92	676	1	59	29	39	231	160	111	107	419	1	1	9	60	44	0	39	29	119	21	8
Candidatus Uhrbacteria bacterium RIFCSPLOWO2_02_FULL_51_9	19	21	5	8	0	10	0	7	2	13	0	9	7	1	0	0	4	33	21	263	11	25	5	0	9	11	12	13	65	1	31	12	14	14	12	6	37	54	1	0	1	43	18	0	13	13	56	2	1
Acinetobacter pittii	19	97	30	43	0	24	0	20	2	53	4	5	35	9	8	0	1	128	66	169	23	71	6	0	44	41	62	44	253	0	221	84	98	105	60	36	65	110	3	2	2	112	11	2	66	57	273	22	2
Mycobacterium asiaticum	19	72	20	24	0	61	0	16	5	30	2	9	43	2	7	1	1	221	118	214	22	60	7	0	17	17	24	31	133	1	342	127	161	42	22	22	38	69	5	5	4	59	18	0	138	123	734	13	3
Sphingopyxis macrogoltabida	19	67	17	20	0	77	0	26	7	45	4	3	35	6	3	0	5	267	135	63	23	53	6	0	14	22	25	42	204	0	203	103	106	45	28	19	55	100	2	8	3	61	18	6	170	193	1270	7	2
Flavobacteriaceae bacterium (ex Bugula neritina AB1)	19	21	10	12	0	13	0	21	3	44	2	10	26	7	10	0	8	45	27	183	21	45	4	1	9	14	23	42	137	0	87	35	52	28	21	12	66	90	2	0	0	35	7	2	31	21	175	4	2
Flavobacterium urocaniciphilum	19	32	5	17	0	11	0	25	6	56	4	6	29	4	4	0	3	54	41	154	24	60	2	0	25	32	35	43	226	1	91	35	56	40	34	18	66	134	0	0	3	35	7	2	38	33	409	5	4
Opitutales bacterium TMED158	19	1007	188	464	0	225	6	170	19	386	2	9	292	71	74	1	5	731	346	153	212	493	5	2	59	65	66	84	755	1	1055	434	600	104	78	56	113	464	0	73	151	220	858	5	411	356	1969	23	5
Anaerolinea sp. 'rifampicinis'	19	116	17	53	1	145	3	42	7	95	1	7	86	15	13	0	2	411	206	219	47	149	4	0	48	49	51	72	334	2	591	241	279	91	52	35	145	180	1	0	6	166	57	0	287	223	1116	5	3
Cupriavidus necator	19	122	27	52	0	91	2	41	3	83	5	3	50	11	10	0	4	293	149	141	41	113	8	1	30	46	62	71	388	1	409	173	211	84	55	48	108	200	6	1	8	92	34	2	146	144	771	12	3
Moraxella caviae	19	57	17	28	0	34	2	25	5	58	0	2	34	6	9	0	3	97	39	60	37	71	2	0	65	36	55	37	193	0	99	29	43	84	50	31	60	72	1	2	3	44	13	0	56	44	174	19	6
Limnoraphis robusta	19	69	13	34	0	69	1	21	4	44	1	7	40	7	4	0	0	152	76	157	36	77	3	0	36	26	46	32	236	1	180	83	97	67	40	23	51	127	0	5	7	61	23	1	96	57	314	14	4
Faunusvirus sp.	19	81	10	32	0	41	1	40	6	92	1	10	41	4	5	0	0	115	52	237	75	206	0	0	36	34	47	24	251	1	158	62	77	87	43	32	155	182	2	0	3	123	29	0	76	61	228	22	6
Methylobacterium nodulans	19	78	18	31	0	74	1	21	3	50	3	7	37	4	5	0	5	286	128	84	19	55	4	1	21	29	35	25	247	1	302	106	143	57	33	35	61	138	2	3	4	33	30	7	82	107	464	8	3
Candidatus Marinamargulisbacteria bacterium SCGC AG-343-D04	19	455	82	202	1	555	20	232	30	389	1	7	225	37	56	0	1	1637	723	184	218	621	7	0	472	539	639	1799	7453	0	1671	663	885	784	520	334	4374	3622	1	11	14	868	254	1	399	340	1550	58	8
Niastella caeni	19	50	9	23	1	46	0	28	1	50	6	11	31	10	3	0	5	159	70	318	40	74	4	0	26	24	40	36	264	3	171	71	71	63	35	32	88	162	2	3	2	43	15	1	66	45	350	5	1
Nocardiopsis alba	19	34	8	14	2	26	0	3	2	17	3	2	12	5	2	1	2	74	43	120	9	14	1	1	7	18	9	13	82	1	100	48	55	21	16	8	12	36	0	2	2	39	7	1	39	41	200	8	1
Haemophilus haemolyticus	19	59	13	27	0	59	2	22	3	56	1	6	40	13	8	0	1	152	77	121	27	84	2	1	36	38	40	59	261	1	222	99	94	56	36	34	98	118	1	2	3	82	16	0	87	91	335	23	8
bacterium 1XD8-92	19	34	7	12	0	28	1	24	1	53	1	7	18	3	4	0	2	74	37	315	18	52	0	0	15	24	25	28	144	1	107	42	50	42	22	21	76	90	1	1	1	49	12	1	41	33	169	4	2
Nisaea sp. NBU1469	19	763	148	349	0	275	9	298	46	547	17	5	336	64	80	3	4	1030	451	106	283	829	15	1	245	326	403	277	3116	3	1332	599	636	715	431	336	575	1461	13	9	30	413	225	21	467	442	2374	66	24
Flavobacterium sp. ALD4	19	42	7	16	1	11	0	20	3	62	2	6	23	6	8	0	0	36	27	117	22	45	4	0	20	17	38	41	179	2	64	24	36	44	26	19	57	141	0	2	0	42	13	0	36	16	164	7	0
T4virus environmental sample	19	18	3	7	0	13	0	1	2	9	3	11	5	2	0	0	1	32	12	376	4	17	2	0	8	14	18	21	26	3	99	41	31	20	16	8	30	31	1	0	1	25	3	1	29	29	93	3	0
Cyclobacteriaceae bacterium	19	87	24	37	0	91	1	58	9	124	3	9	71	12	20	1	2	254	117	204	63	153	4	0	48	58	66	117	596	0	340	145	177	96	57	49	211	313	4	1	3	132	33	3	104	101	537	15	3
Litoreibacter meonggei	18	100	22	32	4	37	1	40	8	71	2	3	46	11	12	0	1	137	43	84	47	94	8	1	36	28	42	34	439	1	172	82	72	101	57	47	96	224	1	0	3	85	18	1	39	56	255	9	6
Cryomorphaceae bacterium BACL22 MAG-120619-bin32	18	127	21	55	0	44	0	81	14	191	3	10	107	24	20	0	3	140	66	313	89	219	3	0	81	85	111	105	845	2	247	85	125	161	119	74	270	503	0	4	3	100	30	1	76	50	301	20	9
Kordia antarctica	18	95	9	29	1	36	0	42	10	76	1	9	55	7	19	3	2	162	56	236	51	150	14	0	40	75	61	64	462	2	219	80	98	104	71	47	186	291	5	0	4	75	27	2	77	62	908	13	3
Paenibacillus hemerocallicola	18	42	12	18	0	40	1	20	3	49	2	5	29	8	7	0	0	155	79	80	24	55	0	0	14	26	28	19	122	0	199	92	121	30	19	23	58	60	1	2	3	69	13	1	86	85	370	9	5
Synechococcus sp. UW140	18	402	81	173	1	12	1	102	21	236	4	11	267	45	54	1	2	37	14	136	73	141	2	0	333	422	537	83	2752	0	61	24	35	862	534	394	69	2151	1	9	22	92	156	2	14	12	58	4	1
Vicingus serpentipes	18	333	48	115	0	155	1	227	37	441	3	12	197	43	43	1	2	565	264	207	229	661	6	0	234	253	318	144	2258	1	1072	468	572	446	286	198	417	1484	2	3	8	201	115	3	432	320	1854	70	20
Paraburkholderia youngii	18	24	6	9	0	29	1	16	2	19	0	5	12	1	4	0	2	96	39	123	15	25	2	0	14	12	21	19	81	4	124	51	65	29	14	7	18	37	1	1	2	18	9	1	32	50	201	9	0
Agrobacterium deltaense	18	164	22	60	0	28	1	112	23	282	2	43	75	13	20	0	10	91	37	1409	66	191	21	0	92	90	133	90	728	2	94	41	54	190	136	80	205	411	2	2	3	129	44	4	47	45	384	22	6
Gaiellales bacterium	18	39	8	18	1	65	0	20	3	41	2	6	20	5	6	0	4	199	84	179	10	40	5	0	16	15	25	63	154	7	291	108	128	42	24	11	66	93	0	1	2	94	24	1	101	92	460	2	1
Acidovorax virus ACP17	18	18	4	5	1	5	0	9	1	11	1	6	5	0	2	1	3	18	6	337	11	19	6	1	2	6	6	5	24	0	53	18	12	13	6	2	10	13	0	0	0	11	0	0	11	11	26	2	0
Citromicrobium sp. JLT1363	18	55	13	20	0	817	22	12	3	44	115	16	527	154	118	9	49	6995	3757	30	24	51	73	4	20	30	27	54	676	0	221	99	475	46	35	25	52	357	3	64	97	367	344	498	3142	3234	51918	31	4
Rubripirellula amarantea	18	248	50	87	0	151	6	52	9	116	2	19	187	40	50	0	3	537	251	308	75	206	3	0	45	57	84	40	552	2	805	347	522	107	85	48	77	365	1	8	15	71	105	2	247	239	1352	12	3
Teredinibacter franksiae	18	172	31	58	1	88	4	61	9	127	5	11	101	22	16	0	2	342	156	237	56	170	10	1	44	59	75	120	470	1	600	231	271	93	62	35	137	213	1	5	1	104	48	3	140	134	605	18	7
Candidatus Methyloumidiphilus alinensis	18	124	22	62	0	99	2	54	7	98	6	13	54	10	23	0	3	389	158	320	60	136	8	1	60	56	59	167	523	0	510	183	228	106	81	61	184	257	1	6	3	162	32	6	178	173	872	14	1
Parabacteroides goldsteinii	18	30	5	11	1	32	1	17	3	31	0	6	13	2	2	3	1	73	28	152	11	61	4	1	13	15	13	20	146	1	107	50	43	21	23	5	53	61	2	0	0	39	10	2	38	37	150	5	0
Candidatus Campbellbacteria bacterium CG22_combo_CG10-13_8_21_14_all_36_13	18	32	6	20	0	37	2	16	4	44	0	7	15	3	4	0	0	99	44	155	10	54	0	0	12	12	17	42	133	0	129	48	47	41	32	13	72	63	0	1	1	50	12	3	44	38	194	3	0
Synergistetes bacterium HGW-Synergistetes-2	18	28	4	7	1	10	0	10	3	25	0	6	7	1	3	0	1	62	28	269	9	28	1	0	5	10	8	14	56	0	70	21	31	16	4	8	37	28	0	0	1	22	4	0	13	22	103	3	1
Agarilytica rhodophyticola	18	267	61	102	2	146	2	105	17	206	4	3	166	28	35	2	8	433	194	165	117	323	9	2	83	117	135	286	979	5	677	287	291	221	129	99	424	514	9	13	14	280	81	1	217	197	997	40	6
Calycomorphotria hydatis	18	259	59	120	0	290	10	52	8	123	5	7	131	28	49	0	2	926	480	214	103	239	4	0	55	57	86	91	701	1	1491	687	866	153	91	72	140	444	2	8	16	101	150	3	435	387	2244	8	2
Pseudomaricurvus alkylphenolicus	18	555	98	195	2	350	8	197	34	392	6	9	272	59	71	1	3	1240	562	149	188	548	13	0	160	213	264	585	1779	3	1945	1327	787	408	252	160	725	787	18	13	14	459	127	6	589	512	2586	41	11
SAR202 cluster bacterium Ae2-Chloro-G1	18	337	48	139	0	3207	107	84	13	159	0	3	145	28	29	0	0	9467	4131	48	133	307	0	0	33	42	52	248	706	0	11502	4485	8588	64	33	31	268	282	0	23	30	1692	619	0	4824	4178	23346	1	0
Ochrobactrum anthropi	18	31	5	17	2	31	0	11	2	41	3	4	14	10	3	2	4	137	87	149	17	28	11	0	22	19	26	25	186	5	189	68	79	39	23	25	45	87	8	3	1	36	15	4	79	71	560	5	2
Caballeronia temeraria	18	18	2	5	2	11	1	9	0	15	2	1	9	1	4	0	1	54	31	170	7	15	3	0	6	9	10	5	57	4	66	22	29	22	6	8	11	36	3	0	1	13	5	1	24	22	81	4	3
Cobetia marina	18	21	7	13	1	5	0	9	2	10	3	7	7	1	4	2	3	21	10	153	5	22	30	1	5	8	9	11	79	2	46	49	22	25	13	4	22	51	3	4	4	10	7	1	64	44	258	3	2
Candidatus Atribacteria bacterium 1244-E10-H5-B2	18	44	9	20	0	55	2	31	5	55	3	4	24	7	7	0	4	204	84	219	40	84	5	1	22	14	21	28	176	3	239	117	121	39	29	19	79	99	2	1	1	79	23	1	129	104	466	5	4
Maricaulis maris	18	83	20	40	0	61	1	32	4	66	5	3	38	10	10	2	8	159	80	50	44	86	13	0	32	28	35	52	254	3	202	74	98	65	38	29	116	111	82	3	4	80	52	59	247	264	1663	41	10
Candidatus Microgenomates bacterium	18	60	15	23	0	79	3	39	12	85	4	4	35	2	9	0	4	293	130	153	21	115	4	1	33	42	52	78	331	0	341	101	136	89	46	37	195	147	0	1	1	156	30	3	135	80	467	10	2
Candidatus Moranbacteria bacterium	18	84	17	41	1	99	2	40	6	96	2	10	63	9	15	1	4	301	106	200	66	132	2	2	54	78	81	80	456	0	354	170	204	159	106	89	181	285	2	4	9	141	37	2	131	120	591	16	5
Pandoravirus salinus	18	59	16	22	0	23	0	13	3	32	0	8	21	1	5	0	1	62	22	238	30	51	0	0	41	43	53	9	156	1	50	36	26	81	42	48	16	112	0	4	9	33	8	1	37	27	65	14	6
Synechococcus sp. TMED19	18	1080	350	448	1	45	1	368	35	970	6	34	915	196	225	0	3	118	60	231	133	278	1	0	184	163	147	20	835	0	29	15	12	273	183	213	44	585	0	18	29	59	223	0	13	18	86	14	5
Alphaproteobacteria bacterium CG_4_10_14_0_8_um_filter_53_9	18	71	10	21	0	37	1	39	7	88	2	9	43	9	6	0	4	109	42	168	33	109	2	0	21	30	51	44	253	3	132	41	66	63	33	28	108	93	4	2	1	105	21	3	38	38	199	10	2
Chlamydiae bacterium CG10_big_fil_rev_8_21_14_0_10_42_34	18	81	9	27	1	68	1	46	9	68	4	9	46	8	10	0	5	188	106	256	51	140	8	0	27	51	61	69	310	2	213	104	100	97	54	47	145	183	3	6	5	135	34	1	80	74	467	7	2
Iningainema sp. BLCCT55	18	72	18	26	0	44	0	20	5	48	0	4	30	6	4	1	1	158	70	100	24	75	1	0	30	41	46	31	184	1	201	96	100	67	42	39	46	112	1	2	3	38	30	2	84	67	339	7	0
Phragmitibacter flavus	18	226	54	89	1	174	2	45	2	112	1	7	135	36	30	0	2	564	267	207	76	193	2	0	52	79	87	67	727	2	841	364	476	146	84	68	111	407	1	6	10	76	91	2	246	262	1375	8	2
Desulfocapsa sp.	18	70	13	21	0	65	0	22	6	81	3	9	42	11	7	0	3	177	87	243	36	87	3	0	14	28	42	55	172	5	462	166	181	41	24	21	89	126	1	4	7	59	14	4	142	126	462	7	3
Balneola sp. EhC07	18	208	43	91	0	135	7	93	25	212	8932	5	127	24	33	26	162	533	224	126	109	272	19	0	71	84	109	211	792	814	678	298	420	144	114	88	351	447	10293	5	9	1051	106	1779	292	266	3476	38	10
Lachnospiraceae bacterium MD335	18	12	7	9	0	18	0	6	4	15	1	4	11	0	3	0	2	52	31	103	11	26	2	0	6	9	15	8	62	0	76	17	32	17	18	6	21	43	0	0	1	13	5	0	20	15	88	1	2
Pseudanabaena sp. PCC 7367	18	149	35	65	0	70	3	44	13	112	3	5	62	19	13	0	2	241	108	183	55	127	2	0	93	121	153	65	570	0	303	149	158	245	155	116	133	373	0	1	5	129	57	2	119	99	478	23	5
Cyanobacteria bacterium QS_8_64_29	18	105	21	39	0	38	1	40	9	60	2	6	52	6	15	0	3	95	41	152	37	90	3	1	57	97	138	51	402	0	97	47	51	270	178	126	84	295	0	0	4	72	35	3	41	32	192	12	7
Macrococcus caseolyticus	18	136	41	54	1	25	1	32	7	93	4	5	50	10	14	0	3	118	67	319	50	128	1	0	62	81	86	36	323	1	102	47	44	130	80	69	70	217	0	7	11	61	11	1	40	50	178	13	4
Synechococcus phage S-H35	18	10	2	5	0	2	0	5	0	6	1	20	1	0	0	0	5	2	1	376	9	20	3	0	5	8	6	2	4	0	1	1	2	8	4	5	7	9	0	0	1	12	0	1	0	0	5	1	0
Ulvibacter marinus	18	112	21	52	1	69	2	66	11	137	5	10	102	12	12	1	14	390	144	198	59	171	61	5	72	56	71	112	589	10	306	135	136	127	90	74	203	424	16	1	4	110	34	3	99	95	2487	8	2
Mesorhizobium sp. L2C089B000	18	17	0	5	0	3	1	5	0	10	7	6	6	1	2	0	4	7	3	98	6	19	4	0	4	9	3	23	22	7	10	7	9	9	5	1	21	14	2	0	1	35	2	0	6	2	59	2	0
Galbibacter sp. BG1	18	99	21	41	0	47	2	87	8	154	2	4	105	21	30	0	4	165	78	148	76	188	15	1	60	65	72	118	698	1	182	81	99	146	87	56	251	412	3	3	5	132	28	0	75	52	1132	15	6
Emticicia sp. 17J42-9	18	70	8	29	0	39	1	24	1	55	7	16	34	7	8	1	3	121	59	261	38	95	4	1	40	47	46	42	263	4	147	72	99	63	49	31	100	176	0	2	4	67	12	2	54	30	258	9	3
Pseudanabaena sp. FACHB-2040	18	132	35	66	1	83	2	34	7	95	0	0	60	21	10	0	2	224	98	85	55	133	2	1	99	136	172	53	504	0	279	134	154	334	230	144	86	429	0	3	9	84	42	0	93	102	567	15	3
Synechococcus sp. BL107	18	934	220	382	0	34	0	275	34	630	1	5	567	116	132	1	4	111	36	194	176	419	2	1	23870	32291	36493	3261	228053	0	367	166	334	76497	50301	41041	222	221761	0	11	23	112	239	3	23	23	106	48	17
Osedax symbiont Rs1	18	180	31	71	0	169	3	77	16	160	4	13	89	14	16	0	1	541	223	256	78	198	7	1	66	94	89	185	670	0	796	321	303	162	93	77	271	292	3	2	2	162	46	0	225	227	952	19	4
Roseovarius faecimaris	18	201	29	92	0	142	5	82	13	156	17	12	124	32	24	1	2	492	201	283	70	178	2	0	75	121	130	74	908	0	612	237	249	197	167	92	172	430	3	1	3	78	39	2	199	180	932	28	10
Planctomycetales bacterium zrk34	18	375	89	178	2	463	16	69	11	163	3	10	191	38	56	0	5	1463	658	212	118	307	5	1	65	97	102	110	1021	6	1577	775	913	179	118	76	164	627	0	15	15	154	143	2	863	908	4999	13	4
Rubritalea marina	18	161	41	61	0	75	3	37	10	94	1	13	122	24	30	2	1	291	136	241	73	195	3	0	44	60	58	31	483	0	493	180	274	121	66	51	66	242	0	5	7	60	63	2	121	109	594	8	3
Ruminococcus bromii	18	45	8	19	0	34	1	23	3	35	1	5	23	5	4	1	3	100	37	146	25	61	5	0	31	37	46	67	215	1	143	56	74	76	53	42	100	110	1	1	1	79	14	1	72	57	243	1	1
Azospirillum oryzae	18	45	13	14	2	33	1	10	2	38	8	8	12	1	2	0	6	117	63	159	16	44	6	0	15	18	18	13	140	2	122	68	75	39	22	24	33	75	3	3	2	23	14	2	50	37	250	6	2
Candidatus Thiomargarita nelsonii	18	283	42	115	0	360	10	114	20	215	2	15	123	29	33	1	4	1105	472	352	104	285	7	2	89	108	154	301	893	1	1428	576	626	227	142	88	440	443	4	5	11	320	74	3	510	467	2298	24	3
Anaplasma phagocytophilum	18	194	25	81	0	73	3	91	11	155	0	4	91	15	13	0	0	281	136	119	76	200	3	0	83	82	155	133	480	0	433	186	102	280	197	110	201	269	1	6	11	179	26	0	94	77	276	39	10
Rhodococcus sp. RD6.2	18	38	7	12	0	22	0	10	2	17	1	2	19	1	6	0	2	110	57	239	17	37	1	0	9	7	5	24	58	1	63	41	28	11	8	4	30	17	0	0	3	36	6	3	47	44	462	2	1
Gloeothece verrucosa	18	84	22	22	1	72	2	34	7	72	4	18	36	6	8	0	1	210	100	318	24	89	5	0	43	48	51	52	284	0	261	103	124	90	57	52	74	184	4	4	4	97	45	1	102	83	442	9	4
Mastigocoleus testarum	18	108	20	49	0	65	4	36	14	75	2	8	45	13	10	1	3	219	92	141	51	117	4	0	55	80	83	56	406	1	290	90	159	174	110	70	94	256	0	1	5	84	55	1	111	99	441	15	4
Panacagrimonas perspica	18	181	33	59	0	84	4	64	18	107	2	24	89	13	20	1	6	412	164	640	76	198	83	11	53	58	57	158	523	0	518	233	218	97	68	46	206	208	4	5	4	150	57	13	185	147	1021	15	3
Flavobacterium johnsoniae	18	56	13	19	0	43	3	31	5	52	2	4	32	4	6	1	1	130	69	167	23	64	5	0	29	47	58	40	290	2	178	67	103	76	70	40	113	184	1	1	2	48	23	2	70	52	522	11	4
Tardiphaga robiniae	18	28	10	14	1	25	2	11	1	27	1	5	18	2	7	0	2	94	45	100	4	41	3	0	4	14	8	10	108	0	148	63	70	34	11	10	31	51	1	1	0	19	9	2	55	61	246	4	2
Bordetella avium	18	18	5	6	1	24	2	9	1	12	1	4	12	1	3	1	2	54	27	56	5	14	6	1	5	9	13	15	48	2	81	40	37	9	11	6	27	25	1	1	0	21	5	3	39	25	179	3	1
Candidatus Omnitrophus magneticus	18	86	19	40	1	112	2	43	11	115	5	4	43	5	18	2	2	405	175	262	51	159	4	1	38	45	56	102	416	3	479	178	220	75	54	44	197	220	2	5	2	131	28	2	150	139	671	11	2
Synechococcus sp. KORDI-100	18	2106	509	886	0	69	4	556	83	1446	0	27	1485	344	356	1	2	181	81	458	325	774	6	0	521	706	763	64	3985	0	111	46	45	1650	1069	888	100	4208	2	41	45	149	495	1	36	30	202	94	17
Taibaiella helva	18	43	10	21	0	21	1	25	5	55	0	9	28	3	3	2	2	85	47	157	19	47	0	1	14	21	24	17	191	1	120	43	46	41	18	19	53	120	0	1	1	47	16	1	44	44	229	4	1
uncultured Mediterranean phage uvDeep-CGR2-KM23-C198	18	2	1	1	2	6	1	1	0	1	5	4	0	0	0	2	4	19	13	179	0	2	9	0	2	0	1	2	5	2	27	14	11	1	1	1	4	4	2	0	1	6	0	2	24	32	96	0	0
Azospirillum baldaniorum	18	190	30	72	0	88	3	62	7	150	9	10	92	20	31	2	12	359	169	267	74	165	10	0	57	81	88	171	728	4	421	191	218	144	99	53	208	333	2	2	7	218	41	4	162	182	1277	17	4
Roseofilum reptotaenium	18	109	30	48	0	70	3	34	10	94	3	11	75	11	21	0	4	219	122	236	61	138	3	0	113	132	158	70	563	1	321	126	137	383	261	157	132	414	0	2	9	95	66	1	103	102	484	20	5
Panacibacter ginsenosidivorans	18	69	7	30	1	58	3	25	3	65	2	8	45	7	5	1	0	213	76	117	48	117	4	1	30	38	42	67	273	0	283	103	147	68	46	33	109	198	1	0	4	64	24	0	108	81	484	9	4
SAR202 cluster bacterium Casp-Chloro-G3	18	691	116	313	0	3237	81	108	14	254	1	7	195	35	33	0	0	8603	3967	88	136	387	0	0	90	98	143	306	1476	0	8648	3661	5373	135	99	47	406	655	0	35	62	2180	1293	1	8284	7716	38921	4	1
Enterococcus casseliflavus	18	23	7	10	0	27	1	16	4	33	1	5	15	2	6	1	3	77	25	138	18	70	9	0	17	24	26	23	139	0	83	42	29	44	18	15	61	60	0	2	3	35	13	0	42	25	130	1	2
Paenibacillus alvei	18	62	13	24	2	50	0	19	3	42	2	5	34	4	3	0	3	154	65	173	17	63	4	0	15	18	15	40	141	2	171	75	80	22	22	19	52	80	2	2	1	60	16	2	67	54	242	4	3
Prochlorothrix hollandica	18	139	24	66	0	61	2	54	4	103	5	8	75	11	11	1	0	212	92	216	44	135	4	0	101	150	184	69	559	3	289	123	127	396	250	188	110	386	0	7	9	104	53	1	103	87	416	22	8
Oricola sp. NBU1457	18	181	38	79	2	96	8	78	13	160	15	3	107	34	28	2	8	549	259	122	81	202	7	1	65	94	104	162	893	4	454	216	209	210	114	81	271	388	14	7	2	206	94	59	235	208	86124	27	2
Lentisphaerae bacterium ADurb.Bin242	18	80	27	40	1	87	2	33	5	58	0	4	55	7	13	0	5	261	128	104	46	108	0	1	31	43	52	64	327	0	363	157	212	82	40	37	114	185	0	0	2	103	32	0	166	142	713	6	0
Rhizobiales bacterium TMED29	18	730	123	277	0	55	0	346	42	684	0	1	345	62	89	1	1	217	101	109	279	819	0	0	185	235	263	605	1816	0	392	163	168	475	307	200	972	853	0	9	10	681	132	0	95	68	346	227	58
Rubinisphaera brasiliensis	18	357	75	151	0	329	10	74	18	183	0	11	193	43	39	0	6	1001	509	161	106	252	6	1	70	102	97	83	1034	1	1795	802	1140	154	133	83	136	635	2	10	20	98	228	2	470	516	3058	9	3
Methylophaga sp.	18	364	67	147	18	405	10	199	31	376	800	6	255	49	50	162	907	1240	530	170	175	505	1557	185	178	204	253	720	1747	17	1840	884	746	396	249	171	763	755	760	8	9	466	137	348	738	592	8708	33	11
Cryomorphaceae bacterium MED-G11	18	5979	995	2377	0	247	5	3046	506	5975	0	57	5047	990	1282	0	0	1304	573	533	4712	13764	2	0	2075	2462	3011	5288	25981	1	3369	1327	1542	5539	3389	2427	16162	15964	1	41	64	5081	765	0	361	274	921	1163	346
Sphingomonas hengshuiensis	18	61	11	24	0	39	2	23	2	43	4	0	27	4	9	1	4	189	103	65	20	55	1	0	20	28	26	64	255	2	186	105	129	62	32	26	76	137	3	2	3	42	12	8	115	87	969	2	2
Gammaproteobacteria bacterium MedPE	18	108	13	39	0	55	0	40	6	86	1	6	37	7	16	0	2	212	83	239	46	84	3	0	30	29	35	74	267	0	267	108	127	52	29	31	105	114	1	5	0	58	14	2	82	76	355	9	3
Oceanospirillum sp. D5	18	237	43	98	1	93	4	65	9	99	3	3	71	8	12	2	2	320	140	85	45	123	10	1	30	40	36	93	343	4	492	199	189	53	47	32	110	195	2	1	6	94	34	2	154	128	602	14	5
Aeromonas salmonicida	18	63	10	28	2	50	1	19	5	49	0	3	29	5	5	0	1	136	63	92	32	48	4	0	33	35	61	36	269	2	161	94	68	74	49	37	57	204	3	3	3	65	18	1	82	67	448	20	7
Spirosoma sp. HMF4905	18	31	11	16	0	43	1	11	2	42	6	12	25	7	6	1	8	136	77	216	12	49	6	1	12	16	21	16	166	0	235	100	92	33	26	10	57	89	1	0	1	47	16	1	70	59	348	3	0
Acetobacter pasteurianus	18	21	5	12	2	11	0	7	2	19	2	7	4	3	5	1	6	40	14	154	5	20	3	0	4	11	9	5	57	1	28	17	25	22	11	6	13	30	0	1	0	12	7	3	28	27	243	5	3
Alicyclobacillus macrosporangiidus	18	86	15	31	1	71	4	26	5	60	2	8	51	10	11	1	5	246	119	191	32	82	3	1	21	41	33	47	228	1	324	130	173	40	23	20	97	110	3	2	2	75	19	3	125	128	562	5	2
Cyanophage Syn2	18	26	3	17	2	0	0	13	3	25	2	23	3	1	2	0	5	2	3	840	16	51	4	1	2	0	0	0	2	0	3	0	3	2	3	0	0	2	0	1	1	5	1	0	1	0	1	2	0
Zobellia laminariae	18	48	5	24	1	27	0	36	11	70	5	6	29	2	8	1	6	114	28	150	34	72	8	0	31	35	48	59	320	0	130	45	39	73	46	27	107	174	2	2	2	46	15	3	47	20	313	5	1
Luteolibacter luteus	18	163	49	58	0	82	7	42	8	82	1	7	95	13	25	0	2	285	146	178	53	109	9	0	31	39	50	33	413	3	467	199	255	66	50	32	75	218	1	4	8	61	54	0	149	124	657	11	4
Thalassospira sp. TSL5-1	18	54	14	24	0	29	1	12	1	40	3	2	21	7	9	0	4	99	40	85	21	55	4	0	20	18	27	40	188	2	123	42	53	48	32	20	48	98	3	1	1	32	15	5	56	48	505	9	3
Synechococcus sp. WH 8101	18	278	59	113	0	6	0	78	14	194	1	28	170	31	48	0	6	30	14	584	34	111	10	0	182	222	245	26	1631	0	32	16	11	439	324	255	44	1306	1	12	21	70	243	2	11	9	43	13	4
Alteromonas sp. IB21	18	35	10	16	0	56	1	5	1	9	2	2	21	4	1	0	0	189	97	100	9	14	3	0	50	57	84	212	216	0	213	178	37	78	58	43	135	183	0	7	16	33	130	0	127	129	6393	2	1
SAR202 cluster bacterium Casp-Chloro-G4	18	506	67	187	0	2733	71	137	14	231	0	3	208	38	53	0	0	7022	3312	52	169	524	0	0	81	96	126	616	1221	0	5710	2560	3894	148	121	66	599	473	0	22	39	3188	831	0	6225	5717	28687	8	2
Deltaproteobacteria bacterium GWA2_45_12	18	115	26	48	2	122	6	51	9	101	2	10	59	18	14	0	3	426	164	204	44	157	11	1	36	51	54	146	470	5	497	208	234	76	44	42	234	237	0	5	5	158	30	0	170	148	756	7	4
Salinisphaera hydrothermalis	17	120	15	45	0	77	6	25	1	59	8	2	56	10	13	2	7	294	127	115	31	80	12	1	24	25	28	68	316	2	307	134	168	39	34	21	85	138	5	3	6	68	29	7	160	128	671	6	2
Paenibacillus polymyxa	17	63	7	23	0	61	2	10	5	26	3	9	27	4	2	0	7	174	82	233	11	58	3	0	24	41	46	80	208	2	201	91	59	67	40	23	108	104	0	2	0	49	14	3	87	69	885	12	4
Bordetella holmesii	17	12	7	8	4	38	1	2	0	7	0	2	13	3	1	0	0	57	25	68	7	11	2	0	14	9	7	24	105	16	51	29	56	22	6	8	73	75	0	0	2	75	49	0	25	21	350	2	1
Parcubacteria group bacterium Greene0714_7	17	22	6	17	2	9	0	4	1	17	3	9	9	1	0	1	5	33	16	208	3	23	6	1	5	5	7	26	42	4	43	19	19	12	9	3	29	17	3	1	3	17	5	1	15	19	58	0	0
Planctomycetes bacterium Pan216	17	390	77	150	0	426	9	67	10	208	5	16	216	40	52	1	2	1313	643	234	152	301	2	0	72	75	108	94	1005	1	2085	910	1220	163	104	78	186	621	1	23	26	180	227	2	676	684	3451	16	5
Mesorhizobium plurifarium	17	159	24	61	0	79	3	72	13	174	5	5	76	26	13	0	6	226	98	160	87	229	5	1	56	79	120	221	687	0	279	118	130	167	101	78	215	307	2	2	7	199	31	7	80	84	733	25	7
Chromatiales bacterium RIFOXYA1_FULL_46_5	17	17	4	9	0	2	0	16	2	19	3	3	7	1	3	0	3	3	1	99	4	17	2	0	3	2	6	12	44	0	16	7	7	9	8	4	12	23	0	1	1	8	5	0	1	1	10	2	0
Kiloniella laminariae	17	439	73	164	0	377	14	148	30	389	10	9	230	41	54	0	4	1149	556	197	174	506	8	1	149	198	212	269	1777	2	1864	723	674	357	242	169	603	770	5	6	15	394	98	8	559	416	2067	43	13
uncultured phage MedDCM-OCT-S08-C233	17	3	0	1	0	1	0	0	0	0	0	6	0	0	0	1	2	5	1	94	0	2	6	2	0	1	0	1	2	0	7	1	2	3	1	0	3	1	0	0	0	2	0	1	2	2	3	0	0
Myroides odoratus	17	42	6	11	0	21	0	24	8	33	5	4	21	4	5	1	1	73	22	158	24	52	2	0	11	32	29	22	194	3	66	29	38	46	30	16	58	109	2	1	1	34	8	3	27	19	194	6	1
Klebsiella quasipneumoniae	17	47	15	17	1	51	2	10	3	27	0	9	30	6	1	1	2	191	91	169	18	56	5	0	36	41	40	29	180	1	187	78	81	57	41	29	55	72	0	6	6	50	17	1	81	82	380	25	7
Indivirus ILV1	17	153	18	58	0	39	0	53	13	102	1	12	42	7	8	0	0	144	58	285	78	228	2	0	46	48	60	45	274	0	172	51	58	98	63	38	190	178	1	4	6	142	31	0	79	61	223	21	11
Alphaproteobacteria bacterium MarineAlpha6_Bin5	17	235	35	76	2	1773	58	156	26	307	1	11	133	32	33	0	0	5343	2284	196	186	526	0	0	183	214	246	283	1479	0	3725	1524	1256	414	246	203	926	572	1	3	13	1159	296	1	2458	1935	9800	11	4
Alphaproteobacteria bacterium MarineAlpha2_Bin1	17	5859	934	2319	0	644	24	2683	447	5164	2	29	3958	717	925	0	0	2378	999	313	4424	12358	4	1	1627	2032	2436	4979	20178	0	2769	1126	1143	4092	2557	1779	10377	7698	1	29	53	5164	1056	1	713	633	3218	83	30
Rhodovulum sp. NI22	17	8	7	2	0	16	1	6	1	12	6	2	4	1	2	11	49	83	34	47	7	14	51	5	11	5	10	19	996	0	40	21	118	20	10	12	17	524	3	2	1	28	23	10	42	36	50212	6	1
Methylocystis rosea	17	21	2	3	0	11	0	6	0	17	0	5	10	3	1	1	3	25	12	110	10	23	5	0	8	6	12	14	62	1	33	14	10	13	16	5	27	32	0	1	0	23	4	0	17	12	154	1	1
Calothrix membranacea	17	24	5	7	0	9	0	4	1	25	2	2	9	0	2	0	3	22	12	99	3	20	3	0	7	6	13	7	48	0	40	23	20	16	13	8	13	21	1	1	2	11	2	0	14	14	72	1	0
Pedobacter sp. AR-3-17	17	74	11	28	2	53	1	40	8	94	2	7	39	9	8	0	2	167	80	175	37	109	4	1	25	46	64	82	417	0	282	87	142	96	54	39	194	280	3	0	4	77	22	1	77	66	354	6	1
Prosthecobacter dejongeii	17	127	40	58	0	112	2	25	5	77	8	8	86	21	27	0	6	371	155	206	43	124	9	1	43	51	53	42	468	4	551	225	287	95	71	44	73	313	2	7	5	49	58	9	171	163	938	5	2
Pseudomonas syringae group genomosp. 3	17	41	8	23	0	22	1	4	0	27	0	15	22	5	5	0	1	81	56	199	15	43	14	0	12	23	22	37	154	4	83	50	72	46	26	16	52	58	4	2	7	34	10	1	80	65	627	5	3
Burkholderia lata	17	52	16	25	3	63	0	17	5	48	0	8	26	6	14	0	6	155	80	294	15	39	4	1	33	27	47	27	191	3	182	84	93	50	34	32	50	65	1	4	4	30	18	2	91	77	479	7	4
Betaproteobacteria bacterium TMED82	17	435	73	162	0	122	5	202	32	417	1	9	276	60	74	2	4	401	138	252	228	597	4	1	99	132	172	242	1134	2	513	210	230	274	176	115	507	581	4	8	9	341	129	3	159	114	553	50	13
Thalassospira alkalitolerans	17	149	28	75	0	94	4	64	12	160	9	8	74	18	23	4	18	262	124	108	75	200	17	0	43	62	64	67	570	1	381	155	180	132	66	48	156	260	6	9	2	128	48	10	233	148	1000	20	11
Dyadobacter bucti	17	65	10	28	1	67	0	25	7	76	4	1	43	5	16	0	2	188	86	97	32	113	3	0	25	37	43	44	299	0	210	98	104	63	39	26	105	163	3	4	2	64	20	2	81	76	487	6	1
Alphaproteobacteria bacterium TMED89	17	756	234	319	0	194	6	185	26	424	3	8	319	81	83	0	2	669	286	185	240	574	1	0	351	366	440	197	2064	0	978	382	333	710	421	407	420	880	5	32	33	296	97	0	231	201	1058	117	30
Teredinibacter turnerae	17	259	57	131	0	118	3	93	17	174	9	4	135	25	35	0	4	449	204	170	102	283	16	1	73	88	121	183	773	1	688	322	263	178	97	79	214	361	6	3	7	174	47	4	244	266	1553	34	6
Parcubacteria group bacterium Gr01-1014_44	17	21	4	10	1	22	2	5	1	17	2	12	6	1	2	1	1	52	23	203	7	35	6	1	13	18	23	27	67	2	89	39	33	19	23	8	59	41	2	1	2	31	2	1	29	27	107	2	3
Stigmatella aurantiaca	17	144	50	63	0	99	2	31	4	78	2	9	80	8	12	0	2	322	186	173	52	122	3	2	46	39	61	61	358	0	416	164	212	82	43	59	88	192	1	12	8	102	25	1	148	138	749	16	2
Synechococcus T7-like virus Sep4-2	17	1	1	0	1	0	0	0	0	2	1	1	1	0	1	0	1	0	0	55	0	0	2	0	0	0	0	0	0	0	0	0	0	0	0	0	0	1	0	0	0	0	0	0	0	0	0	0	0
Rhodococcus rhodochrous	17	35	6	14	0	36	1	3	0	25	1	3	14	4	2	0	1	99	49	57	15	18	1	1	13	9	8	13	75	0	155	57	64	20	11	11	16	31	1	3	1	29	11	0	65	51	274	3	0
Richelia intracellularis	17	138	34	41	0	47	2	55	16	142	1	4	47	6	9	0	0	165	67	150	58	120	0	0	161	171	229	81	1063	0	148	65	70	383	236	168	162	624	2	1	10	98	99	1	68	49	270	22	5
Ostreococcus lucimarinus virus OlV3	17	169	29	65	0	0	0	47	4	76	2	42	41	10	9	1	5	10	1	1196	102	245	1	0	3	2	2	1	7	0	1	0	1	1	1	3	7	8	0	0	0	8	0	0	0	0	2	0	0
Geobacillus kaustophilus	17	13	1	2	0	4	0	4	1	9	1	3	1	0	2	1	0	18	8	99	3	12	1	1	7	5	5	5	48	2	29	19	13	13	4	2	35	22	2	1	0	13	4	0	8	8	26	1	0
Bergeyella zoohelcum	17	52	11	28	2	36	1	28	4	69	2	8	41	5	8	2	7	122	57	181	34	103	10	1	28	35	40	68	371	1	141	58	95	69	50	28	121	209	0	1	6	71	11	2	44	43	210	11	5
Nitrospira bacterium SG8_3	17	109	20	42	2	195	5	42	2	74	7	11	46	12	11	2	3	648	311	179	44	103	8	0	31	35	45	89	389	10	727	299	356	70	58	35	132	208	4	2	3	113	47	2	242	254	1124	6	4
Alphaproteobacteria bacterium CG11_big_fil_rev_8_21_14_0_20_39_49	17	480	91	187	3	240	6	218	50	520	2	9	265	50	59	1	2	791	383	199	239	688	3	0	188	203	286	435	1859	4	963	425	397	475	290	221	879	856	4	12	10	660	111	1	303	275	1396	46	14
Oxalobacter formigenes	17	159	19	53	1	93	5	64	17	116	7	10	76	15	15	1	3	266	105	180	80	176	5	0	44	67	58	135	477	3	400	168	184	117	84	46	212	230	1	2	3	189	38	2	127	132	605	16	1
Luteibacter yeojuensis	17	69	20	23	0	39	0	21	3	38	4	8	35	8	6	1	4	130	56	93	18	51	7	0	24	16	34	34	203	0	189	90	95	49	30	23	73	100	0	1	4	54	22	2	67	64	351	12	1
Mycobacterium kansasii	17	91	45	32	0	70	1	26	2	50	1	6	44	11	6	1	4	252	132	155	22	73	6	1	41	45	34	13	183	0	362	196	153	64	36	49	13	74	3	7	14	28	6	4	96	104	509	25	4
Verrucomicrobiae bacterium DG1235	17	355	68	130	0	154	1	64	11	140	2	10	163	24	41	1	3	512	228	251	93	240	4	0	48	57	81	86	721	0	697	301	403	119	76	56	165	345	2	25	34	129	255	7	259	249	1390	12	4
Morganella morganii	17	57	15	21	1	51	2	38	6	73	2	4	30	4	9	1	4	159	63	165	25	85	10	0	28	32	33	55	264	2	174	85	108	66	42	31	118	112	1	4	1	54	24	3	83	62	627	4	5
Sphaerobacter thermophilus	17	106	19	35	0	205	5	27	3	55	1	5	59	10	9	1	4	625	323	140	36	94	4	1	32	30	31	94	294	0	643	316	393	59	35	23	110	163	0	2	5	247	78	1	430	385	1777	4	2
Candidatus Kaiserbacteria bacterium RIFCSPHIGHO2_01_FULL_48_10	17	33	7	8	3	25	1	9	1	22	5	10	10	1	4	1	5	71	23	294	12	40	3	0	7	5	7	24	56	4	61	29	24	27	7	6	31	21	1	1	0	31	3	4	22	26	111	7	1
Desulfuromonas sp. TF	17	88	12	32	2	103	5	20	8	74	4	5	33	2	9	0	2	329	136	223	36	108	8	0	32	38	42	56	284	2	381	165	196	60	36	15	90	138	3	3	2	96	23	1	180	146	713	8	3
Jejuia pallidilutea	17	88	10	33	0	53	2	48	17	104	0	3	64	9	16	1	5	204	83	138	46	105	9	0	53	48	60	78	529	0	233	93	100	133	66	57	190	294	2	1	3	87	35	1	111	84	1432	8	4
Salisaeta longa	17	98	15	40	0	117	3	37	3	76	1	3	39	3	6	0	2	372	162	109	33	90	5	0	45	62	52	70	369	0	517	195	257	134	87	62	98	217	0	3	2	121	41	2	140	136	659	9	5
Tetraselmis virus 1	17	174	27	63	0	37	1	58	9	101	1	13	33	12	6	0	1	103	42	364	79	218	1	1	33	41	50	40	196	1	131	46	55	70	47	27	247	164	1	1	3	194	23	0	88	58	189	7	4
Paraburkholderia sp. BL10I2N1	17	32	3	12	0	17	1	11	3	18	1	8	16	3	4	0	1	64	28	136	12	27	2	0	16	17	20	16	122	4	89	42	31	31	24	17	25	61	2	0	0	19	5	2	29	23	144	3	1
Thiorhodovibrio sp. 970	17	130	32	69	0	165	3	57	5	106	0	8	80	18	23	1	3	575	284	133	63	131	5	2	47	62	66	112	520	3	821	303	393	105	66	68	159	245	1	3	5	134	46	0	260	227	1151	9	6
Chlamydia sp. 2742-308	17	21	4	6	0	13	1	12	0	13	1	15	10	1	3	1	2	28	11	284	8	30	4	0	9	6	14	30	66	0	51	18	16	12	16	6	22	30	0	0	5	24	7	1	9	7	47	0	0
uncultured Mediterranean phage MEDS3 group	17	0	0	2	0	0	0	0	0	0	3	7	1	0	0	0	8	0	0	147	1	1	4	0	0	0	0	0	0	0	0	0	0	0	0	0	0	0	0	0	0	0	0	0	0	0	0	0	0
Olavius algarvensis associated proteobacterium Delta 3	17	194	34	97	1	223	9	93	13	174	3	6	101	29	28	0	1	661	292	130	69	233	1	0	51	83	90	146	646	2	762	301	382	120	91	61	216	329	3	8	8	218	54	1	308	266	1320	20	6
Sinorhizobium fredii	17	177	25	69	1	208	12	86	11	136	2	9	128	21	40	0	9	648	276	245	86	219	9	0	96	122	136	235	827	5	802	343	290	204	138	94	351	340	2	6	5	340	40	4	282	289	1608	24	4
Flammeovirgaceae bacterium 311	17	170	31	72	0	130	4	84	12	155	2	14	91	22	23	1	0	491	227	243	82	238	14	2	79	89	90	159	746	2	529	213	281	153	91	68	358	445	5	2	3	215	71	2	193	158	958	12	5
Flavobacterium sp. ov086	17	25	4	10	0	0	0	11	0	21	0	0	7	1	5	1	2	9	5	62	7	39	2	0	1	2	2	2	15	0	9	3	3	4	1	1	5	6	0	0	0	5	1	0	3	4	14	1	0
Carboxylicivirga sp. M1479	17	157	24	65	0	107	1	108	24	200	1	9	115	15	27	0	0	343	163	118	106	243	1	0	70	89	135	129	856	2	474	201	224	162	114	97	269	539	0	4	9	161	40	0	134	140	661	15	5
Variovorax sp. UMC13	17	31	8	13	0	27	1	19	1	26	1	6	21	6	2	0	2	79	59	75	9	25	6	0	13	16	9	10	108	1	114	41	50	33	20	9	17	42	0	1	2	42	11	0	51	25	259	3	1
Arenicella xantha	17	228	45	87	0	178	9	94	16	204	2	6	132	31	24	1	2	738	295	185	96	276	3	2	73	95	100	222	788	1	942	400	454	176	121	65	313	441	0	5	6	199	59	1	293	272	1387	31	5
Ekhidna lutea	17	330	49	146	0	198	6	179	35	373	4	8	203	23	51	1	2	742	255	156	182	513	12	3	108	152	141	318	1827	1	1037	459	486	264	170	123	1215	1046	9	11	9	753	118	10	451	356	1758	34	3
Parcubacteria group bacterium ADurb.Bin192	17	24	8	12	0	23	0	13	4	24	2	14	15	3	1	1	10	74	40	274	17	27	17	0	18	10	21	23	86	1	90	34	46	23	13	10	35	39	0	0	1	33	8	1	33	33	131	4	3
Aestuariibacter sp. GS-14	17	43	7	20	0	85	4	21	2	35	2	3	64	8	10	0	1	1040	453	75	15	35	2	0	35	46	56	101	335	0	200	125	94	105	62	40	123	187	1	4	10	48	61	0	366	270	1747	12	2
Rodentibacter pneumotropicus	17	39	4	19	1	12	0	18	0	33	0	3	9	3	1	0	0	31	22	190	16	36	1	0	25	27	32	11	113	0	37	23	13	49	25	22	17	62	0	5	2	14	4	2	23	23	53	11	8
Proteus phage Saba	17	0	1	0	1	0	0	0	0	2	1	8	0	0	0	2	2	0	1	99	0	0	9	0	0	0	0	1	1	5	1	0	1	4	0	0	0	2	0	1	0	0	0	1	0	0	0	0	0
Okeania sp. KiyG1	17	80	23	37	0	40	2	33	6	72	2	12	32	12	8	0	3	153	66	329	42	102	2	0	42	49	59	28	282	1	196	90	105	128	73	58	82	175	0	2	4	53	21	0	97	68	385	23	5
Gloeocapsa sp. PCC 73106	17	95	8	31	0	44	1	32	7	74	2	5	51	4	10	0	1	151	70	137	38	86	3	0	32	53	67	53	255	0	228	99	115	108	73	65	117	160	0	5	3	99	45	0	75	59	359	14	5
Inhella inkyongensis	17	48	9	22	1	17	0	19	3	35	5	7	24	5	7	0	7	78	32	138	27	67	3	2	12	9	13	25	87	1	128	52	63	24	16	6	20	56	1	1	1	36	6	1	38	48	160	11	0
Gemmobacter sp. HB-1	17	78	15	19	1	27	1	37	2	58	4	1	37	6	14	0	0	119	54	26	26	75	3	0	22	28	32	19	211	0	85	40	43	51	26	24	38	106	2	1	1	43	8	2	44	64	337	7	2
Flavobacteria bacterium GWA2_35_26	17	53	6	16	1	20	0	24	5	40	2	2	30	2	7	0	1	87	26	85	20	68	5	0	15	18	26	32	195	2	98	50	55	36	26	15	82	128	2	2	0	28	10	0	38	27	223	2	1
Runella sp. SP2	17	25	5	14	1	53	2	18	3	19	10	9	10	3	1	1	5	132	52	320	7	41	6	1	24	19	31	32	182	1	154	63	92	37	30	16	79	109	3	1	1	38	18	3	69	62	289	4	0
Pseudoalteromonas tunicata	17	918	157	366	0	66	1	492	101	963	0	12	625	107	166	0	2	287	121	314	617	1735	6	1	212	218	297	726	1608	1	582	234	236	526	323	207	1292	764	1	19	13	1424	125	2	111	112	595	108	19
Candidatus Kentron sp. LFY	17	158	25	48	0	116	3	55	13	97	3	7	56	10	19	2	2	404	202	178	43	133	3	0	27	38	53	121	371	1	467	207	234	71	50	30	139	170	0	2	2	148	35	1	204	174	831	12	6
Salipiger pacificus	17	110	19	43	0	68	2	28	0	48	21	3	53	10	12	1	9	248	117	57	42	80	13	2	45	41	41	26	393	3	266	121	150	75	51	32	58	207	6	7	13	58	36	7	242	267	2145	14	8
Acidisphaera sp. S103	17	325	79	147	0	211	13	82	18	182	6	6	166	36	36	4	2	719	319	182	124	316	9	1	70	120	136	104	1092	1	1127	499	552	214	141	103	166	493	2	15	19	272	152	2	388	351	1848	25	5
Ruminococcus albus	17	94	24	34	1	36	0	36	4	66	1	3	41	5	7	0	2	119	54	210	35	105	1	2	37	51	44	49	299	5	191	73	90	89	40	44	98	120	3	2	1	81	32	2	57	51	244	10	3
Ulvibacter litoralis	17	83	15	34	0	87	4	46	5	119	10	16	91	17	17	0	6	495	230	152	47	134	59	10	46	57	69	70	500	4	264	79	112	114	85	54	166	348	25	0	2	107	41	3	108	93	4053	22	6
Halomonas massiliensis	17	11	1	2	2	31	0	1	0	4	7	3	7	0	2	0	10	31	12	110	2	6	32	3	3	6	10	6	47	2	47	29	20	10	3	5	6	26	2	1	0	3	0	2	25	19	168	0	1
bacterium SM23_57	17	65	10	21	0	124	0	27	3	61	4	6	41	9	6	0	4	385	176	173	31	94	9	2	20	22	28	86	297	0	490	195	308	40	23	18	160	158	0	3	4	152	38	0	192	144	784	3	1
Deltaproteobacteria bacterium ADurb.Bin207	17	211	57	81	0	142	2	57	11	130	2	7	84	21	18	1	2	451	212	181	64	190	5	0	38	51	53	67	398	0	519	245	278	88	64	43	109	239	2	5	14	136	58	1	189	172	933	26	4
Saccharospirillum salsuginis	17	344	53	143	0	149	5	128	18	239	8	9	189	39	40	0	1	549	217	207	119	325	3	1	73	93	130	227	1003	0	812	337	346	172	108	67	215	467	3	5	10	193	52	1	241	192	1009	24	5
Pseudomonas sp. Sample_16	17	0	0	0	0	1	0	2	0	2	0	5	1	0	0	1	2	4	2	85	1	6	4	0	2	0	4	4	9	1	6	0	2	4	2	5	1	2	1	0	0	4	0	2	3	4	3	0	0
Candidatus Microthrix parvicella	17	407	95	180	0	680	19	132	22	317	2	7	196	49	53	0	4	2615	1379	158	117	274	8	1	191	289	315	477	2427	1	4952	2337	2195	562	372	254	716	1290	4	11	10	517	137	3	1116	1084	4085	25	5
Ayaqvirus S45C18	17	2	1	0	0	1	0	0	0	0	3	9	1	2	1	6	59	0	2	157	3	3	10	2	0	0	0	2	2	0	12	8	1	2	0	1	2	3	1	1	1	7	5	3	1	1	6	0	0
Clostridium cellulovorans	17	60	10	23	0	41	0	29	2	60	1	6	26	6	9	1	1	101	50	196	21	66	2	1	16	23	35	46	181	0	135	55	66	42	33	32	97	95	0	4	0	73	15	0	37	32	211	7	0
Candidatus Hodgkinia cicadicola	17	255	45	96	0	29	0	79	21	149	0	6	86	14	17	0	3	93	40	247	74	209	4	0	66	91	101	147	504	0	128	52	47	196	106	62	216	307	2	2	3	131	13	0	38	37	225	15	5
Flavobacterium pallidum	17	39	6	23	0	24	0	23	4	53	2	11	29	9	9	2	0	81	35	262	41	90	1	0	27	25	45	32	258	0	138	61	90	49	33	24	65	144	0	3	3	66	13	2	48	43	510	15	1
Planctomyces sp. SH-PL14	17	278	62	110	0	391	10	62	8	113	0	7	165	28	45	1	4	1247	641	184	96	217	1	0	55	80	105	73	787	1	2029	943	1301	148	99	62	113	485	2	15	17	113	187	1	582	620	2964	12	3
Nitrospinae bacterium RIFCSPLOWO2_12_FULL_45_22	17	82	23	43	0	182	7	42	6	65	0	5	55	12	13	0	3	638	272	148	43	127	1	0	26	33	36	87	317	2	824	361	408	67	32	30	179	193	1	2	7	162	51	2	317	270	1400	4	3
Betaproteobacteria bacterium GR16-43	17	81	18	30	1	94	2	33	6	56	6	5	34	14	9	1	4	313	158	154	27	95	6	1	33	58	57	93	372	1	394	138	208	84	50	42	129	177	1	3	4	102	22	2	153	134	701	8	1
BD1-7 clade bacterium	17	346	55	131	0	186	9	117	32	261	4	8	230	48	50	0	1	751	368	233	210	519	8	2	85	103	129	222	966	1	1117	479	489	175	121	84	277	439	3	9	5	241	70	3	272	242	1310	29	9
Flammeovirgaceae bacterium	17	111	23	49	0	95	6	70	14	131	3	9	97	14	17	1	4	339	144	182	56	201	12	0	46	41	58	115	628	2	427	163	224	87	73	42	351	365	6	1	7	172	44	2	154	119	576	10	4
Phycisphaera sp.	17	258	60	105	0	223	6	36	8	112	5	6	162	37	33	9	71	735	330	127	84	195	21	1	66	83	73	133	774	6	1130	463	714	127	94	71	169	458	2	3	8	109	43	22	317	316	2948	13	2
Plesiocystis pacifica	17	480	127	181	0	235	4	102	18	245	1	9	217	35	47	1	1	842	411	245	134	282	3	1	95	127	143	139	1052	1	1001	447	584	200	119	101	183	681	3	13	19	142	119	1	332	305	1839	23	6
Aeoliella mucimassa	17	285	58	108	0	342	9	55	11	113	2	9	145	34	33	0	3	1080	577	191	63	217	1	1	44	51	79	83	735	0	1591	668	1114	120	61	60	89	431	2	17	29	97	329	3	576	532	3044	8	1
Lactobacillus phage LfeInf	17	2	0	1	0	0	0	0	0	1	3	3	0	0	0	0	4	1	0	66	0	0	3	0	0	0	0	0	0	3	1	0	0	1	0	0	0	3	1	0	0	4	0	1	0	0	1	0	0
Cnuella takakiae	17	59	8	21	1	36	1	25	4	54	3	9	28	7	10	1	5	159	43	190	23	84	6	0	14	21	31	37	222	1	133	63	83	49	31	23	75	169	1	2	3	47	19	2	62	46	292	7	4
Hyphomonas adhaerens	17	92	19	29	0	42	3	22	8	89	98	5	30	10	8	5	23	133	61	54	42	71	59	6	50	60	68	71	1248	3	152	72	89	130	92	85	84	603	23	37	42	241	227	31	3226	3231	23241	41	11
Alteromonadaceae bacterium 2753L.S.0a.02	17	189	36	68	2	111	2	59	13	101	4	7	85	10	23	1	4	334	130	270	57	181	12	2	41	62	71	129	574	6	523	220	227	116	82	54	196	258	5	1	3	118	50	4	168	150	959	8	5
Cesiribacter andamanensis	17	128	15	49	0	79	2	63	7	138	1	9	65	14	23	1	3	280	115	274	63	189	7	2	55	61	82	116	601	1	366	150	193	97	62	45	259	325	5	1	7	121	37	0	153	111	582	18	3
Gynuella sunshinyii	17	235	47	106	2	132	1	103	17	235	6	5	143	30	31	0	4	478	190	130	131	297	12	2	66	61	85	181	671	3	589	268	238	159	107	65	206	320	3	11	4	176	63	0	202	212	1123	22	7
bacterium ADurb.Bin236	17	85	16	45	1	117	5	37	10	56	4	14	63	5	10	1	4	339	168	588	47	138	3	0	35	56	60	125	414	3	380	149	206	87	49	38	187	165	1	2	2	211	30	2	158	130	727	5	0
Pandoravirus inopinatum	17	56	8	26	0	19	0	0	0	15	0	2	23	2	5	0	1	44	28	115	14	21	0	0	21	22	24	13	111	0	67	30	24	38	19	17	20	49	0	6	3	27	6	0	31	25	122	9	3
Planctomycetes bacterium K22_7	17	248	58	89	0	225	3	55	3	105	3	8	188	31	47	1	4	687	336	128	81	221	5	1	46	68	72	39	656	2	941	443	603	120	99	60	88	417	2	13	26	74	132	4	317	280	1621	13	4
Cenarchaeum symbiosum	17	29	5	10	1	406	14	14	3	23	2	4	42	8	6	1	3	1446	570	104	18	64	3	0	12	32	32	89	200	1	1603	641	276	55	32	29	123	84	0	1	2	218	14	0	458	381	1047	5	1
Varunaivibrio sulfuroxidans	17	684	155	309	0	350	14	217	33	440	5	7	304	57	77	1	1	1143	519	103	176	567	3	1	232	298	304	229	2597	0	1506	634	669	564	350	238	473	1211	5	11	19	312	158	3	554	536	2191	50	18
Candidatus Aegiribacteria sp. MLS_C	17	39	6	21	1	84	2	22	4	40	2	6	27	7	6	0	2	242	97	133	16	47	4	0	10	26	22	46	160	1	290	118	151	28	16	15	67	96	0	2	1	73	25	1	100	95	431	4	3
Deltaproteobacteria bacterium HGW-Deltaproteobacteria-20	17	93	23	42	1	56	1	23	6	54	1	1	47	9	6	0	1	228	113	131	23	61	0	0	20	22	32	28	225	1	267	113	169	41	25	17	26	113	1	4	4	59	29	2	96	106	547	11	4
Flavobacterium lutivivi	17	68	13	26	2	32	0	44	3	78	2	8	41	14	9	0	2	85	33	174	43	88	3	0	25	40	42	40	319	2	137	50	85	76	40	42	130	235	2	2	1	53	15	3	42	40	566	10	3
Brachyspira pilosicoli	17	58	13	25	0	55	0	28	5	63	2	2	21	5	10	1	2	159	75	113	28	67	0	0	35	46	61	45	294	0	215	62	106	83	58	31	144	135	0	1	6	75	19	0	64	75	313	17	4
Clostridiales bacterium GWF2_36_10	17	31	5	11	0	17	1	7	1	19	0	7	10	1	5	0	0	55	27	147	11	27	0	0	18	7	9	19	103	0	72	27	42	16	9	2	46	61	0	1	0	52	11	0	25	17	101	2	1
Putridiphycobacter roseus	17	280	45	112	1	145	3	179	25	406	1	10	198	54	44	1	3	464	219	233	218	583	2	0	176	195	235	126	1734	0	745	293	429	376	239	156	366	1244	1	4	8	194	85	2	223	200	1047	55	16
Bacillus pumilus	16	30	7	18	1	30	0	9	4	37	3	6	18	4	2	0	4	119	57	171	19	61	3	0	15	11	11	26	123	2	146	61	76	25	18	6	72	89	0	2	1	52	11	0	58	46	296	7	3
Oleiphilus sp. HI0130	16	6	0	3	2	10	1	1	0	3	0	2	6	0	1	0	0	12	8	82	0	5	3	0	2	3	3	3	17	0	13	4	5	3	2	2	6	8	0	0	1	1	0	0	9	7	31	0	0
Sphingobium lactosutens	16	77	15	46	0	257	5	27	5	59	1	11	167	38	43	0	1	1097	634	126	33	90	3	1	18	25	30	65	230	0	122	58	302	32	29	24	54	162	2	15	11	299	78	9	564	610	9263	12	3
Vibrio maritimus	16	20	3	10	1	20	1	16	2	21	4	6	18	3	3	1	3	85	37	135	17	39	4	2	14	16	13	17	101	0	143	48	46	34	14	9	30	66	1	1	1	27	6	2	46	25	182	1	1
Winogradskyella schleiferi	16	64	12	16	0	31	2	24	6	67	0	6	44	2	6	0	5	136	57	152	27	90	14	0	24	29	46	43	348	2	169	72	87	87	53	34	70	190	2	4	4	56	34	4	146	101	2059	11	6
Firmicutes bacterium ADurb.Bin080	16	66	12	14	0	44	3	42	7	57	2	4	31	7	8	2	3	134	56	141	35	106	2	0	22	36	40	61	231	1	176	72	59	72	55	34	111	147	0	1	5	77	26	1	60	48	267	10	2
Bacteroides pyogenes	16	25	6	7	0	25	1	15	5	34	1	3	17	1	4	2	2	80	30	63	14	43	2	0	16	21	19	30	140	5	84	31	38	45	22	11	42	85	2	0	1	18	8	0	31	42	181	4	1
Roseibium sp. RKSG952	16	180	29	66	1	59	1	60	8	124	7	4	88	20	26	1	2	243	93	132	76	169	2	0	77	82	91	98	668	2	330	157	140	197	103	72	192	332	5	3	6	99	41	6	121	90	811	19	4
Ensifer sp. ENS04	16	27	4	10	1	1	1	3	2	21	2	2	9	4	3	1	3	19	9	117	5	15	6	1	2	6	3	5	27	4	16	5	6	10	5	1	8	16	0	0	0	3	2	0	6	9	34	1	1
Kallotenue sp. CFH 73958	16	132	37	60	0	241	5	42	6	98	1	4	80	11	24	0	2	760	345	129	60	152	3	0	38	46	52	84	379	1	851	442	407	91	39	35	105	147	1	11	4	185	60	2	367	351	1668	22	5
Yersinia phage fEV-1	16	8	0	1	0	1	0	1	0	0	0	8	1	0	0	1	2	5	2	107	0	2	3	0	1	0	0	0	0	2	0	6	2	2	0	0	1	1	0	0	0	0	0	0	4	3	3	0	0
Brevifollis gellanilyticus	16	351	61	132	2	202	4	71	7	167	3	5	164	37	27	0	3	734	320	209	103	259	5	0	77	103	111	67	869	6	1053	451	576	180	103	83	126	487	1	15	23	121	105	1	357	327	1823	13	3
Phycisphaerae bacterium RAS1	16	163	34	65	1	215	3	46	7	81	3	11	74	15	29	1	5	611	289	160	47	158	3	2	31	46	38	67	387	1	765	314	462	76	27	30	94	202	0	2	3	108	43	1	289	268	1485	11	1
Thioalkalivibrio sp. HK1	16	561	98	237	1	586	26	184	30	384	5	8	287	58	65	0	2	1893	871	155	190	563	5	0	192	185	232	389	1674	0	2624	1103	1176	420	256	197	497	816	7	6	16	418	157	1	982	873	4030	40	17
Candidatus Saccharibacteria bacterium oral taxon 488	16	10	3	5	0	23	0	6	0	21	2	4	9	3	3	0	1	48	27	73	8	19	2	0	7	10	10	8	58	0	23	13	25	16	11	5	12	28	0	1	1	19	4	0	13	6	59	3	0
Tenacibaculum agarivorans	16	152	31	74	0	57	1	67	21	155	4	11	106	17	24	0	1	189	84	261	69	185	5	0	98	88	126	109	728	0	328	129	193	161	125	88	209	418	0	2	9	94	30	0	96	90	700	19	4
Acaryochloris sp. RCC1774	16	169	37	63	0	84	1	53	5	99	0	5	54	10	12	0	1	288	111	131	61	158	2	0	117	121	152	69	541	0	305	117	157	372	229	200	112	406	2	6	12	74	50	0	103	116	553	29	6
Flagellimonas sp. CMM7	16	65	15	27	0	38	1	37	5	95	4	7	55	11	11	1	2	159	54	121	34	123	4	1	41	42	62	96	420	3	216	85	126	71	56	27	231	234	1	1	1	72	35	4	154	98	1513	10	1
Sphingomonas wittichii	16	54	11	18	0	56	1	18	4	34	2	5	34	6	4	1	1	223	98	115	16	43	7	0	12	18	19	23	145	4	184	82	103	27	16	13	48	88	1	6	5	60	22	3	101	80	936	9	2
Spirosoma sp. PL0136	16	31	9	15	0	46	2	22	4	39	2	6	23	5	5	0	4	146	59	144	15	26	4	1	15	14	20	38	150	1	158	73	91	25	17	14	60	80	4	1	3	35	13	0	75	53	389	3	1
Pseudolabrys sp. Root1462	16	102	21	49	0	91	1	47	3	99	5	7	61	9	23	0	2	246	98	143	44	122	4	1	40	37	51	61	409	1	341	118	146	110	70	60	212	195	1	4	4	101	34	6	109	97	584	11	7
Bdellovibrionales bacterium CG10_big_fil_rev_8_21_14_0_10_45_34	16	200	34	65	0	143	1	84	12	166	0	2	94	14	28	0	1	447	185	109	82	216	3	0	187	210	293	1827	1838	0	478	220	234	234	149	107	760	442	1	1	12	283	54	2	484	432	970	22	7
Neisseriales bacterium	16	58	15	24	0	51	1	34	3	67	1	13	28	6	11	0	0	129	54	151	41	85	3	0	20	29	26	71	223	0	147	58	62	51	38	31	109	130	1	0	1	83	15	0	69	53	259	9	2
Sneathiella glossodoripedis	16	337	39	115	3	197	6	133	18	253	4	8	165	33	37	1	0	656	295	127	117	330	3	0	112	151	162	219	1162	2	906	390	364	296	202	139	425	569	4	4	3	285	96	4	243	241	1095	26	10
Synechococcus sp. PCC 6312	16	138	28	54	0	34	0	43	3	85	1	5	41	14	12	1	4	126	56	210	47	127	1	1	91	122	151	59	498	0	153	51	90	343	200	138	113	345	1	3	3	83	60	2	60	55	246	17	4
Pseudoalteromonas aurantia	16	97	13	44	0	55	1	30	1	73	1	8	45	10	6	0	1	183	87	189	41	98	1	0	27	39	52	100	385	1	333	222	135	73	63	42	164	202	3	2	2	108	36	1	82	64	521	6	2
Acidithiobacillus thiooxidans	16	18	8	9	1	24	0	13	0	18	6	7	10	2	3	0	0	91	49	231	9	22	3	0	16	23	18	25	109	4	124	63	65	24	26	18	39	58	0	3	4	25	9	2	69	53	268	3	0
Bradyrhizobium sp. USDA 3458	16	7	2	4	1	2	0	8	1	6	1	6	2	1	2	1	6	7	2	82	5	12	5	0	1	2	1	0	33	2	3	1	0	5	3	1	2	6	0	0	0	7	3	1	4	1	22	4	0
Chitinophagaceae bacterium IBVUCB1	16	71	4	20	0	76	3	36	7	82	1	9	30	5	13	0	2	234	105	161	31	87	2	0	34	56	52	38	377	2	276	97	165	81	56	43	107	260	0	0	2	67	19	0	110	104	502	14	1
Cyanophage P-SS1	16	26	4	11	1	0	0	12	1	17	1	11	2	0	2	0	3	2	0	296	6	17	0	0	13	6	9	5	18	1	0	0	0	17	11	9	13	16	1	0	3	27	1	1	0	1	0	2	1
Rudanella paleaurantiibacter	16	26	12	8	1	17	0	16	0	35	1	2	18	5	1	0	1	65	30	66	16	31	2	1	15	14	14	10	101	0	100	33	49	29	18	7	24	57	1	1	2	24	9	3	27	26	165	6	0
Streptomyces olivochromogenes	16	20	7	6	0	16	0	7	1	15	6	10	5	0	0	0	2	34	22	238	4	21	2	0	6	5	5	1	29	0	51	31	29	15	9	9	1	11	1	1	3	11	5	3	17	22	197	4	1
Reinekea marinisedimentorum	16	152	32	52	0	93	4	52	14	99	2	6	63	15	17	0	3	352	146	150	57	163	3	1	42	58	72	115	479	0	530	208	214	89	67	52	165	214	0	3	7	127	32	5	125	117	581	16	4
Crocinitomix catalasitica	16	223	33	86	0	133	2	149	25	303	1	14	160	30	37	1	3	400	165	219	149	424	2	0	126	162	199	73	1298	3	695	244	367	280	203	118	256	923	2	2	5	142	91	0	204	154	1106	41	10
Candidatus Entotheonella serta	16	399	85	179	0	762	33	100	17	187	4	3	183	28	38	0	1	2393	1185	207	116	295	1	0	89	114	137	158	1058	0	2815	1143	1476	188	115	107	211	539	3	12	21	618	289	0	1589	1504	6839	14	3
Alteromonas sp. W12	16	86	15	46	0	144	5	3	2	9	0	2	19	2	1	0	0	576	237	47	1	8	0	1	86	144	211	212	489	0	545	233	27	116	71	37	70	467	0	17	19	70	255	0	336	259	15307	9	3
Chromatiales bacterium	16	1031	212	422	0	1467	39	387	67	737	6	13	727	153	159	2	8	5597	2522	298	540	1449	18	4	323	432	542	1901	3469	1	8468	3517	3515	744	481	346	1720	1840	6	17	29	1277	298	23	1857	1630	8452	74	15
Chryseolinea flava	16	117	20	38	0	73	2	51	16	122	2	6	63	14	20	0	2	269	137	202	78	206	6	0	64	65	83	111	621	1	312	145	213	112	81	44	306	395	1	3	5	170	36	4	142	103	703	17	3
Bacillus velezensis	16	64	10	19	1	28	1	29	6	50	0	3	23	10	10	2	4	76	28	146	29	72	2	0	11	17	21	50	154	3	115	32	40	53	23	22	76	64	2	2	1	95	16	1	34	31	171	5	1
Plesiomonas shigelloides	16	56	16	30	0	48	1	20	5	61	1	3	29	3	6	0	5	100	56	184	28	69	15	0	37	36	46	41	230	0	128	65	77	80	52	38	82	120	0	3	4	42	19	2	67	81	380	17	7
Bacillus panaciterrae	16	39	6	14	0	11	0	9	3	19	3	14	12	2	6	1	3	53	28	252	24	37	6	1	7	13	13	21	100	1	87	51	38	23	10	11	40	44	0	1	1	40	11	1	27	29	127	0	2
Streptomyces sp. CB03238	16	17	4	8	1	5	0	3	1	9	4	3	5	1	1	0	2	30	16	91	5	8	3	0	2	8	6	2	27	1	69	27	29	11	9	8	1	8	1	1	3	10	3	0	23	18	154	19	2
Bacteroidetes bacterium RIFCSPLOWO2_12_FULL_31_6	16	127	20	61	0	73	4	89	21	183	3	6	101	21	23	0	0	264	122	209	95	278	5	2	83	110	117	88	834	1	457	179	218	172	129	58	208	582	2	4	3	122	43	1	186	170	822	35	5
Pseudomonas alcaligenes	16	90	24	28	1	39	2	31	4	56	3	3	56	10	14	3	5	182	77	109	41	81	48	5	18	30	45	72	338	0	223	102	265	60	27	25	96	147	4	4	5	88	75	1	219	175	2902	12	4
Alkaliphilus sp.	16	46	11	22	0	37	0	24	4	26	0	7	20	5	6	0	2	120	67	139	24	53	4	1	17	20	37	66	216	1	167	72	74	35	25	13	137	100	0	0	2	75	27	2	52	46	217	2	1
Hymenobacter gummosus	16	25	10	16	1	40	2	15	1	30	0	6	18	1	6	2	0	134	72	104	17	40	1	0	15	13	15	13	130	2	150	83	90	21	15	21	20	61	0	1	3	27	9	0	52	39	216	3	0
Alphaproteobacteria bacterium MarineAlpha3_Bin6	16	2222	448	876	1	21037	632	502	86	1154	5	11	1116	218	264	0	0	67037	30241	188	772	1980	2	0	731	937	1210	467	10288	0	102136	42310	55109	2064	1389	864	1174	5270	5	37	62	666	867	7	41109	36153	199396	103	25
candidate division WWE3 bacterium CG_4_10_14_0_2_um_filter_41_14	16	18	5	3	1	11	0	6	0	14	1	7	10	2	2	0	2	29	14	123	4	16	7	0	2	9	11	5	38	3	33	10	15	8	7	6	12	18	1	1	1	7	4	2	22	10	42	2	2
Cryomorphaceae bacterium BACL21 MAG-121220-bin10	16	128	30	54	0	61	1	83	8	159	0	6	120	22	28	0	1	438	158	143	90	227	7	2	86	62	117	135	871	0	185	94	120	179	96	76	292	483	0	0	1	130	38	1	121	100	3252	19	7
Crocinitomicaceae bacterium	16	219	37	104	1	81	0	193	29	391	1	16	168	29	41	0	4	290	102	262	155	454	1	1	145	147	192	83	1340	0	418	176	247	263	165	108	140	1016	1	4	4	82	49	2	140	130	690	34	8
Algoriphagus boseongensis	16	85	13	41	0	40	1	61	9	92	2	8	41	5	8	0	0	147	60	199	40	122	4	0	19	35	33	68	320	0	198	69	113	79	45	27	130	167	0	2	0	88	19	2	50	55	267	10	2
Alkalispirochaeta odontotermitis	16	5	3	4	0	4	0	4	0	13	0	8	2	0	1	0	5	15	9	163	2	14	4	0	5	4	5	18	18	0	23	16	11	11	8	4	15	5	0	0	2	34	1	2	8	12	49	2	1
Vibrio fortis	16	37	9	12	0	13	0	19	2	34	2	1	19	6	4	0	3	58	20	55	11	36	4	0	11	16	17	36	114	0	81	34	25	25	15	14	46	59	0	2	1	29	13	0	22	16	464	6	4
delta proteobacterium NaphS2	16	122	22	46	0	180	0	46	14	100	0	0	72	13	10	0	0	556	211	70	55	182	6	0	36	45	66	60	378	2	576	250	335	73	42	25	175	184	0	5	3	115	62	1	222	212	1012	9	2
Nonlabens arenilitoris	16	26	5	7	0	10	0	26	5	36	4	9	25	5	5	3	1	38	18	134	19	56	2	0	19	22	33	21	254	2	60	23	20	63	40	28	54	188	1	1	1	19	7	2	17	14	246	7	1
Virgibacillus phasianinus	16	18	2	11	1	19	1	10	1	15	1	1	8	3	3	1	0	69	29	90	9	25	2	0	11	13	19	16	95	1	82	32	30	19	18	10	59	45	1	0	0	33	3	1	26	26	82	3	0
Podoviridae sp. cty5g4	16	2	0	0	0	0	1	0	0	0	1	3	0	0	0	0	7	3	0	86	0	3	6	0	2	1	0	0	2	1	10	1	3	1	0	1	1	2	1	0	0	2	1	2	3	2	6	2	1
Bradyrhizobium sp. 83012	16	5	0	1	1	7	0	4	0	2	1	3	7	5	1	0	5	20	13	126	3	13	4	1	1	2	3	1	12	1	23	7	8	5	3	2	4	7	0	0	0	5	2	1	9	8	50	4	1
Candidatus Kaiserbacteria bacterium RIFCSPLOWO2_01_FULL_54_20	16	11	0	9	3	9	0	5	1	12	1	8	6	1	1	0	2	32	12	139	3	16	3	1	3	7	10	15	42	7	66	16	32	8	7	2	22	26	0	1	1	27	8	1	19	16	75	2	0
Psychroflexus sp. MES1-P1E	16	39	11	22	1	28	0	23	3	55	3	10	29	4	10	1	10	95	47	205	23	63	8	0	32	34	44	55	308	0	147	58	91	62	36	23	112	198	0	1	4	40	9	1	51	34	387	5	4
Pseudomonas savastanoi	16	112	25	34	1	41	2	26	5	76	2	4	36	6	10	3	6	139	52	103	37	107	22	0	35	46	55	96	267	2	202	97	181	113	58	72	96	156	6	4	6	70	31	5	170	172	2236	15	6
Bacteroidetes/Chlorobi group bacterium Naka2016	16	36	8	17	1	25	0	13	2	25	3	7	10	0	2	0	0	66	19	186	13	35	1	0	7	7	12	14	83	0	78	26	35	13	16	8	35	35	0	0	0	31	3	0	16	17	86	3	0
Tupanvirus soda lake	16	46	9	29	0	26	0	15	5	47	1	5	20	0	6	0	0	68	36	204	25	51	0	0	16	30	35	14	97	0	95	34	29	61	49	22	43	84	0	2	1	41	9	0	33	30	120	12	1
Ponticaulis koreensis	16	108	26	49	0	187	8	51	12	107	34	5	136	27	33	1	11	748	357	51	59	162	7	2	58	63	73	161	426	6	1161	700	1468	127	85	61	161	221	13	12	20	162	170	14	819	746	5629	32	6
Pontiella sulfatireligans	16	306	60	124	0	159	4	128	19	286	1	7	141	24	27	0	0	515	223	158	80	223	4	1	61	88	82	133	675	3	703	264	348	140	68	60	202	398	0	3	15	135	89	1	274	220	1128	42	10
Flavobacteriaceae bacterium CG_4_9_14_3_um_filter_33_16	16	21	5	8	1	7	0	8	0	14	3	11	7	1	2	0	9	20	7	196	11	22	6	1	3	5	12	11	46	3	41	14	15	9	7	2	15	27	1	0	3	17	8	1	17	8	85	2	0
Candidatus Kentron sp. FW	16	222	37	77	0	172	4	65	12	143	2	7	107	27	23	0	6	522	221	140	79	189	7	0	67	56	67	142	505	0	677	270	308	127	80	62	208	203	0	5	7	180	47	1	278	267	1196	20	6
Parcubacteria bacterium RAAC4_OD1_1	16	27	5	15	1	17	0	18	5	28	1	7	11	2	1	1	2	54	29	147	10	36	4	0	14	10	9	26	57	1	99	39	30	17	8	10	47	31	2	1	2	48	8	0	25	19	103	3	0
Thermoanaerobacterium sp. RBIITD	16	29	5	14	1	35	1	13	0	48	0	7	20	3	4	1	0	91	44	165	17	72	2	0	12	23	12	54	172	2	97	39	50	29	25	10	77	51	2	2	1	60	18	1	39	41	182	0	2
Mimivirus LCMiAC02	16	111	19	43	0	73	2	63	7	116	0	20	33	9	10	0	2	215	76	598	93	280	0	0	30	42	59	36	247	0	227	80	88	90	58	47	256	192	0	1	6	195	37	1	179	136	437	13	7
Vulcanococcus limneticus	16	178	39	72	0	15	0	72	11	155	0	11	138	24	31	1	1	64	22	314	31	73	6	1	70	115	114	11	654	2	70	35	46	177	154	92	27	514	0	22	22	60	333	2	25	34	130	10	3
Nakamurella silvestris	16	33	7	12	0	25	1	8	0	18	2	6	13	3	3	0	0	84	45	96	8	23	1	0	7	7	4	25	68	1	126	47	59	12	12	7	15	33	1	0	0	23	14	0	55	79	943	4	3
Paludisphaera borealis	16	143	32	47	0	197	8	36	6	64	0	6	79	19	10	1	3	650	319	121	41	104	4	0	32	44	40	39	337	2	889	438	587	81	33	28	60	240	1	5	8	62	90	0	304	299	1553	7	4
Pontiella desulfatans	16	327	56	102	0	182	5	142	31	302	2	7	173	23	46	1	3	686	330	140	88	245	4	1	55	78	87	98	656	1	961	419	524	140	65	56	132	394	2	1	12	203	81	3	328	341	1526	39	19
Flavobacterium sp. LB3P56	16	23	1	10	1	1	0	6	2	13	3	4	3	0	0	0	1	4	4	180	5	16	2	0	5	13	6	2	40	0	4	4	5	6	6	3	7	24	0	0	0	15	1	0	4	4	33	1	2
Candidatus Hydrogenedentes bacterium ADurb.Bin179	16	39	12	18	0	69	6	10	0	23	1	9	16	4	8	1	3	252	111	140	13	49	4	0	9	19	15	48	110	0	292	118	185	32	18	15	45	64	0	0	2	41	15	3	97	94	495	3	2
Endozoicomonas acroporae	16	102	34	41	1	67	0	42	8	79	1	5	52	12	10	0	2	205	90	137	30	107	7	0	42	39	54	92	323	1	246	105	111	104	55	31	104	150	2	3	1	58	22	0	80	78	406	21	4
Lewinella cohaerens	16	251	55	105	0	200	5	121	22	223	5	3	155	30	39	1	2	640	259	187	122	334	6	1	102	142	151	208	1195	0	795	339	435	217	140	89	418	779	8	5	8	190	95	4	342	311	2539	23	9
Fusobacterium nucleatum	16	319	65	144	1	117	6	151	19	266	2	12	142	20	35	0	5	343	142	233	132	379	4	0	262	361	397	436	1807	1	471	186	201	1024	617	414	578	1327	1	3	2	269	61	3	144	119	579	48	14
Gammaproteobacteria bacterium TMED1	16	2142	347	803	0	305	11	646	104	1275	0	9	639	113	149	0	0	1120	530	111	406	1132	4	0	236	306	382	470	3043	0	2133	875	805	589	368	259	663	1495	0	64	94	1337	839	1	516	455	2073	220	53
Quisquiliibacterium transsilvanicum	16	176	39	67	1	139	4	49	13	107	2	5	106	21	28	1	2	458	206	112	62	155	11	2	31	37	41	111	413	2	713	280	288	85	58	44	118	177	2	3	4	128	36	1	227	191	910	8	2
Cyanobacteria bacterium M5B4	16	105	17	49	0	27	0	36	4	83	2	9	54	12	7	1	2	117	43	175	63	158	5	2	131	156	196	59	497	2	104	36	56	562	326	219	96	397	0	2	7	74	50	1	45	46	223	39	11
uncultured Gemmatimonadetes bacterium	16	304	73	113	0	230	7	52	8	101	3	2	70	16	24	1	0	748	351	119	71	156	11	1	92	102	123	63	465	0	926	425	461	143	92	87	64	188	4	10	14	136	47	2	429	367	1878	72	14
uncultured Thiotrichaceae bacterium	16	453	88	173	2	474	16	206	24	378	3	5	274	54	67	0	5	1604	767	161	187	603	11	0	149	184	221	615	1664	3	2619	992	986	358	237	159	663	752	3	6	13	513	131	4	634	557	2685	54	12
Candidatus Buchananbacteria bacterium CG10_big_fil_rev_8_21_14_0_10_33_19	16	35	3	16	3	46	1	23	1	63	4	8	28	3	4	1	7	122	61	201	26	76	7	2	12	20	29	33	185	0	158	78	80	37	25	12	85	104	1	3	1	89	17	1	66	49	219	0	1
[truncated: 49,510 more rows]
[truncated: 27 more columns]
