# Supplementary material for: Metagenomic Analyses Reveal the Influence of Depth Layers on Marine Biodiversity on Tropical and Subtropical Regions
Source: Microorganisms. 2023 Jun 27;11(7):1668. doi: 10.3390/microorganisms11071668 (PMC10386303; doi:10.3390/microorganisms11071668)
Supplement: Supplementary file 1 [file microorganisms-11-01668-s001.zip › SupTableS4.xlsx]

## Sheet: complete_table
Supplementary Table S4. Values of species diversity index and abundance per sample
ID	diversity_index	abundance	depths	stations	samples
DCM - T064 - 594324	0.426664889038343	1537478	DCM	64	ERR594324
DCM - T064 - 598972	0.555726097554781	8247410	DCM	64	ERR598972
DCM - T064 - 599023	0.569720819009687	1466076	DCM	64	ERR599023
DCM - T064 - 599025	0.556281199675563	3285891	DCM	64	ERR599025
DCM - T064 - 594385	0.401475474122095	54390	DCM	64	ERR594385
MES - T064 - 599021	0.58628222045916	4931780	MES	64	ERR599021
MES - T064 - 599164	0.576293225230909	154419	MES	64	ERR599164
SRF - T064 - 598970	0.519445055385619	4024322	SRF	64	ERR598970
SRF - T064 - 599088	0.514761492218122	710792	SRF	64	ERR599088
SRF - T064 - 599150	0.523037933078519	8243407	SRF	64	ERR599150
SRF - T064 - 594392	0.492058616233363	286379	SRF	64	ERR594392
DCM - T065 - 594291	0.467382910800705	688993	DCM	65	ERR594291
DCM - T065 - 598990	0.564660703337974	4232490	DCM	65	ERR598990
DCM - T065 - 599018	0.566305378359349	828817	DCM	65	ERR599018
DCM - T065 - 599110	0.5642652593122	1000060	DCM	65	ERR599110
DCM - T065 - 594382	0.45271882104434	55586	DCM	65	ERR594382
DCM - T065 - 594414	0.461253049851578	313555	DCM	65	ERR594414
MES - T065 - 598960	0.603072943029048	16023173	MES	65	ERR598960
MES - T065 - 599034	0.607376094808765	7103495	MES	65	ERR599034
SRF - T065 - 594320	0.462080444452172	17451383	SRF	65	ERR594320
SRF - T065 - 598979	0.546003536656907	3729919	SRF	65	ERR598979
SRF - T065 - 599146	0.542242288918706	10474704	SRF	65	ERR599146
SRF - T065 - 594359	0.474107165087753	526772	SRF	65	ERR594359
SRF - T065 - 594361	0.465282628746851	52119	SRF	65	ERR594361
DCM - T068 - 599017	0.518403083883213	3478315	DCM	68	ERR599017
DCM - T068 - 599056	0.521657354110264	4185381	DCM	68	ERR599056
DCM - T068 - 599103	0.519666284521052	5112249	DCM	68	ERR599103
DCM - T068 - 594294	0.517364718864798	7847444	DCM	68	ERR594294
DCM - T068 - 594348	0.518921268254509	36536666	DCM	68	ERR594348
DCM - T068 - 594415	0.394041520885768	161138	DCM	68	ERR594415
MES - T068 - 598947	0.582593833421851	21200826	MES	68	ERR598947
MES - T068 - 599131	0.586223653951457	8782607	MES	68	ERR599131
MES - T068 - 594302	0.586864443776836	8787057	MES	68	ERR594302
SRF - T068 - 599129	0.520850805611368	8221171	SRF	68	ERR599129
SRF - T068 - 599171	0.521563147659085	5263925	SRF	68	ERR599171
SRF - T068 - 599174	0.526643092361922	3658670	SRF	68	ERR599174
SRF - T068 - 594318	0.501692216227141	15533279	SRF	68	ERR594318
SRF - T068 - 594297	0.515443812253093	18660494	SRF	68	ERR594297
SRF - T068 - 594391	0.477679778594615	170968	SRF	68	ERR594391
DCM - T076 - 599040	0.606835227442116	160323	DCM	76	ERR599040
DCM - T076 - 599148	0.598093854535457	237182	DCM	76	ERR599148
DCM - T076 - 594321	0.531338159614705	9206499	DCM	76	ERR594321
DCM - T076 - 594298	0.591039287487348	1950065	DCM	76	ERR594298
DCM - T076 - 594355	0.490221901277152	168444	DCM	76	ERR594355
MES - T076 - 599000	0.602555503929566	7451563	MES	76	ERR599000
MES - T076 - 599154	0.606250053225255	6524143	MES	76	ERR599154
MES - T076 - 594333	0.639693909550858	37203809	MES	76	ERR594333
SRF - T076 - 599010	0.563517370951364	758587	SRF	76	ERR599010
SRF - T076 - 599126	0.552444431038048	219127	SRF	76	ERR599126
SRF - T076 - 594310	0.506771084717669	37571481	SRF	76	ERR594310
SRF - T076 - 594286	0.535721126440049	34441336	SRF	76	ERR594286
SRF - T076 - 594354	0.500794909309698	51666	SRF	76	ERR594354
DCM - T078 - 599046	0.573148321340792	2935964	DCM	78	ERR599046
DCM - T078 - 599101	0.569953167323834	11114975	DCM	78	ERR599101
DCM - T078 - 594336	0.527075209849555	34578954	DCM	78	ERR594336
DCM - T078 - 594303	0.545739168952627	23484699	DCM	78	ERR594303
MES - T078 - 599124	0.612110984027744	4181291	MES	78	ERR599124
MES - T078 - 599159	0.599265364104464	3632952	MES	78	ERR599159
MES - T078 - 594289	0.608451532315481	6109227	MES	78	ERR594289
SRF - T078 - 599006	0.515294860102653	4718248	SRF	78	ERR599006
SRF - T078 - 599022	0.529135751748766	3035333	SRF	78	ERR599022
SRF - T078 - 594340	0.502098436407644	38571384	SRF	78	ERR594340
SRF - T078 - 594332	0.505849709154367	15316879	SRF	78	ERR594332
SRF - T078 - 594411	0.451401134375912	265527	SRF	78	ERR594411
DCM - T098 - 599042	0.528902735221505	15211321	DCM	98	ERR599042
DCM - T098 - 599079	0.524637124617527	7594950	DCM	98	ERR599079
MES - T098 - 599071	0.589295549290207	7229982	MES	98	ERR599071
MES - T098 - 599085	0.594948296528865	2854350	MES	98	ERR599085
SRF - T098 - 599093	0.511882913041112	13844277	SRF	98	ERR599093
SRF - T098 - 599120	0.516702239694423	7669270	SRF	98	ERR599120
DCM - T111 - 598961	0.529262907190252	32418801	DCM	111	ERR598961
MES - T111 - 599086	0.598771961110862	39643916	MES	111	ERR599086
SRF - T111 - 599077	0.550061696034615	13896237	SRF	111	ERR599077
DCM - T112 - 598957	0.515132075203246	56756	DCM	112	ERR598957
MES - T112 - 599072	0.588810002562956	1011935	MES	112	ERR599072
SRF - T112 - 598954	0.535488954102273	1368280	SRF	112	ERR598954
